# Supplementary material
Source: publisher figshare collection journal article supplement (https://tandf.figshare.com/articles/dataset/_/7886671)

Quality Control & Pre-processing Evaluation  
of  
E-GEOD-50584.raw.1\_0  
**REPORT**

## Array names and grouping

| ArrayDataFile                 | SourceName | FactorValue |
|-------------------------------|------------|-------------|
| GSM1223926_WIBR3-Mut2_4wk.CEL | Array1     | Group1      |
| GSM1223925_WIBR3-Mut1_4wk.CEL | Array2     | Group1      |
| GSM1223924_WIBR1-Mut_4wk.CEL  | Array3     | Group1      |
| GSM1223923_WIBR3-Con2_4wk.CEL | Array4     | Group1      |
| GSM1223922_WIBR3-Con1_4wk.CEL | Array5     | Group1      |
| GSM1223921_WIBR1-Con_4wk.CEL  | Array6     | Group1      |
| GSM1223920_WIBR3-Mut2_2wk.CEL | Array7     | Group2      |
| GSM1223919_WIBR3-Mut1_2wk.CEL | Array8     | Group2      |
| GSM1223918_WIBR1-Mut_2wk.CEL  | Array9     | Group2      |
| GSM1223917_WIBR3-Con2_2wk.CEL | Array10    | Group2      |
| GSM1223916_WIBR3-Con1_2wk.CEL | Array11    | Group2      |
| GSM1223915_WIBR1-Con_2wk.CEL  | Array12    | Group2      |
| GSM1223914_WIBR3-Mut2_NP.CEL  | Array13    | Group3      |
| GSM1223913_WIBR3-Mut1_NP.CEL  | Array14    | Group3      |
| GSM1223912_WIBR1-Mut_NP.CEL   | Array15    | Group3      |
| GSM1223911_WIBR3-Con2_NP.CEL  | Array16    | Group3      |
| GSM1223910_WIBR3-Con1_NP.CEL  | Array17    | Group3      |
| GSM1223909_WIBR1-Con_NP.CEL   | Array18    | Group3      |

# RNA degradation plot

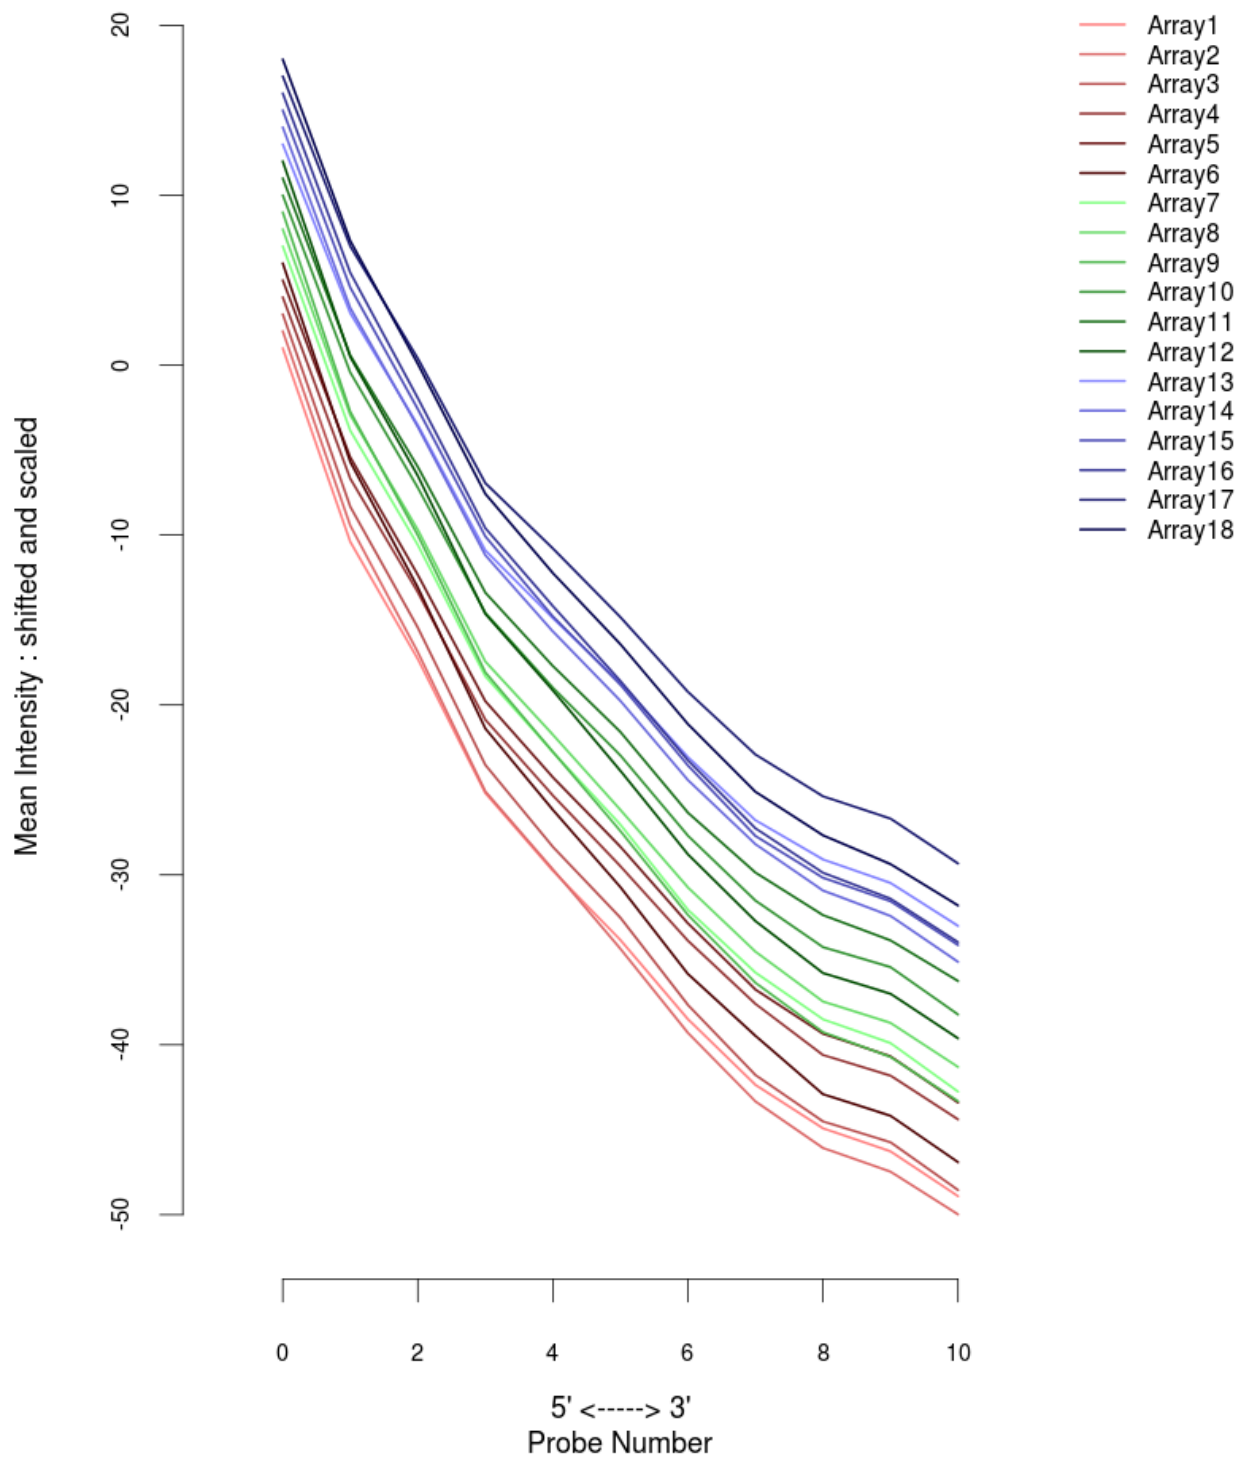

# affx control profiles

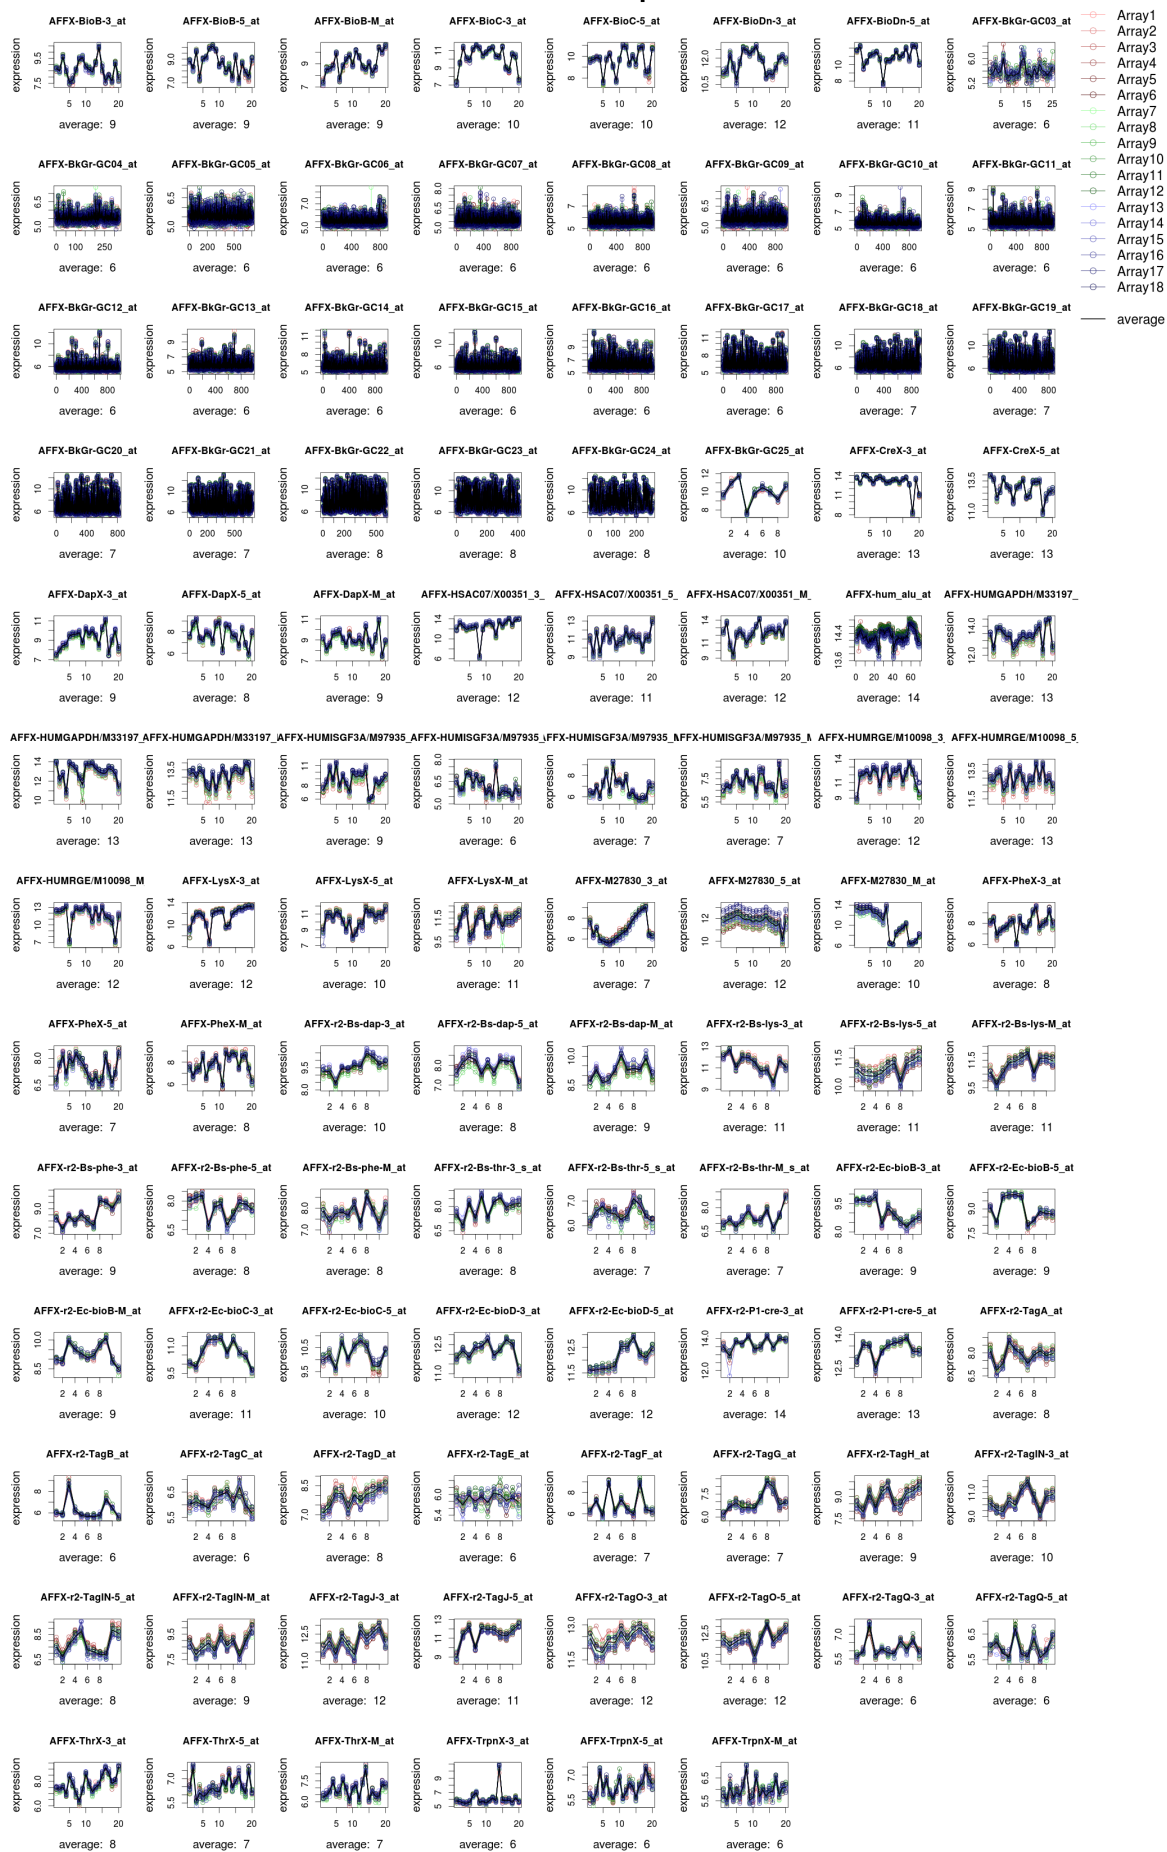

# affx controls

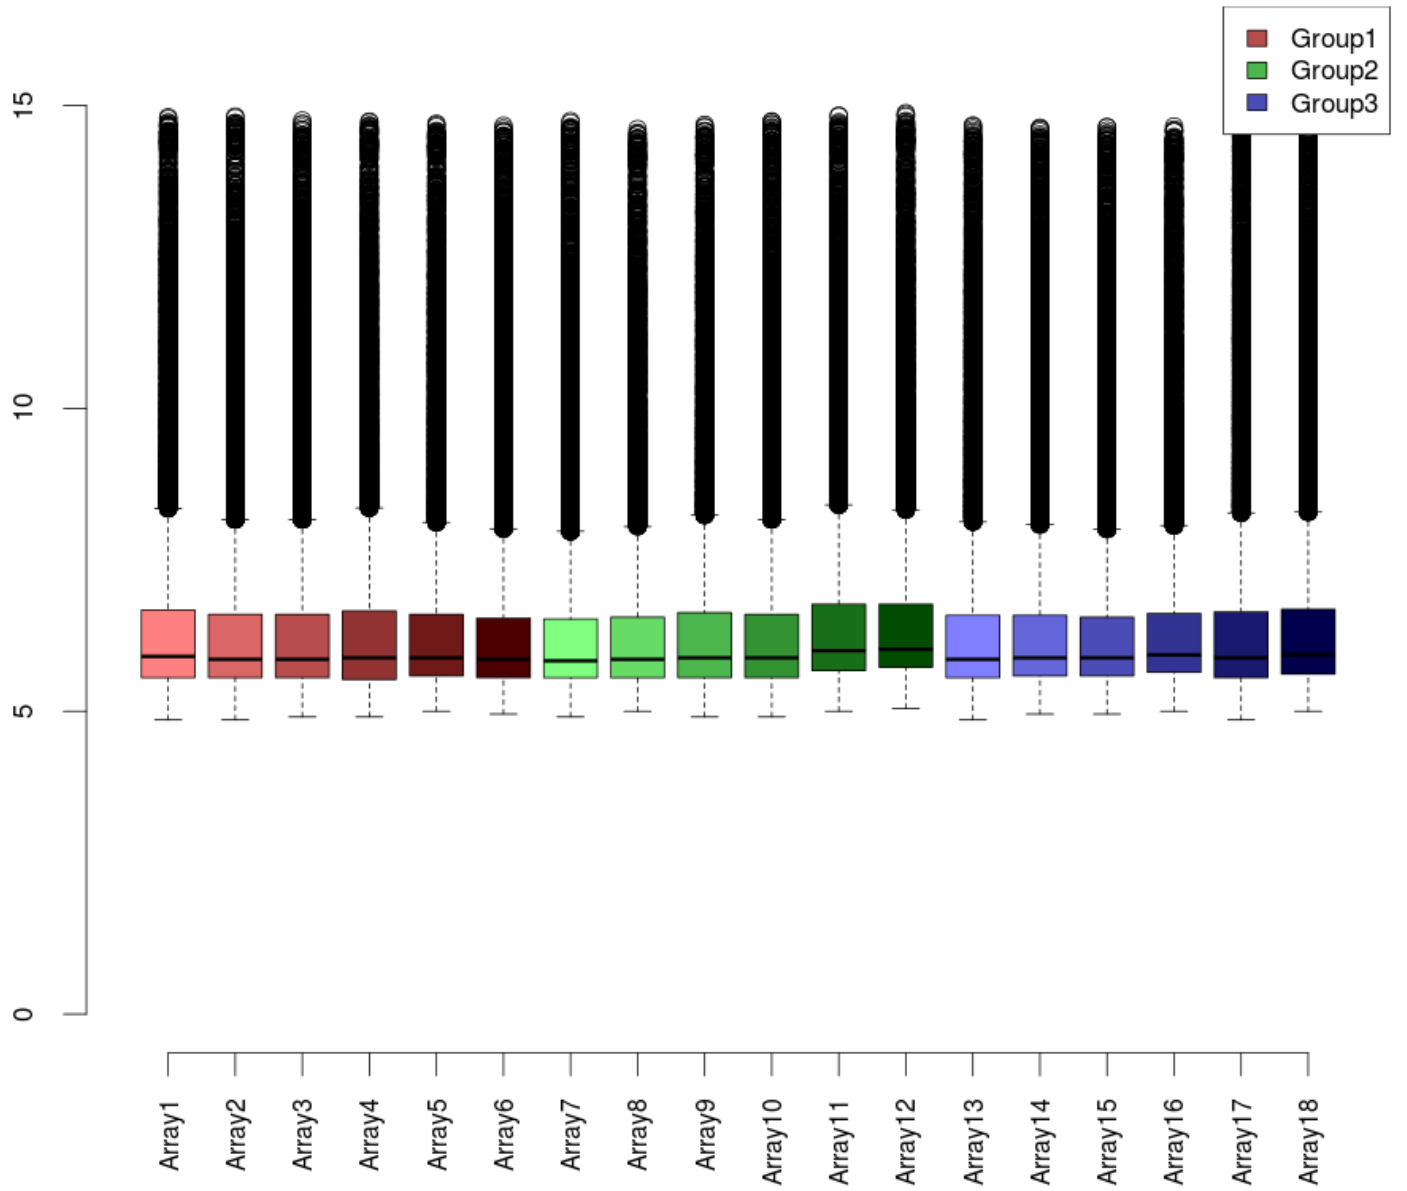

# Boxplot of raw intensities

Distributions should be comparable between arrays

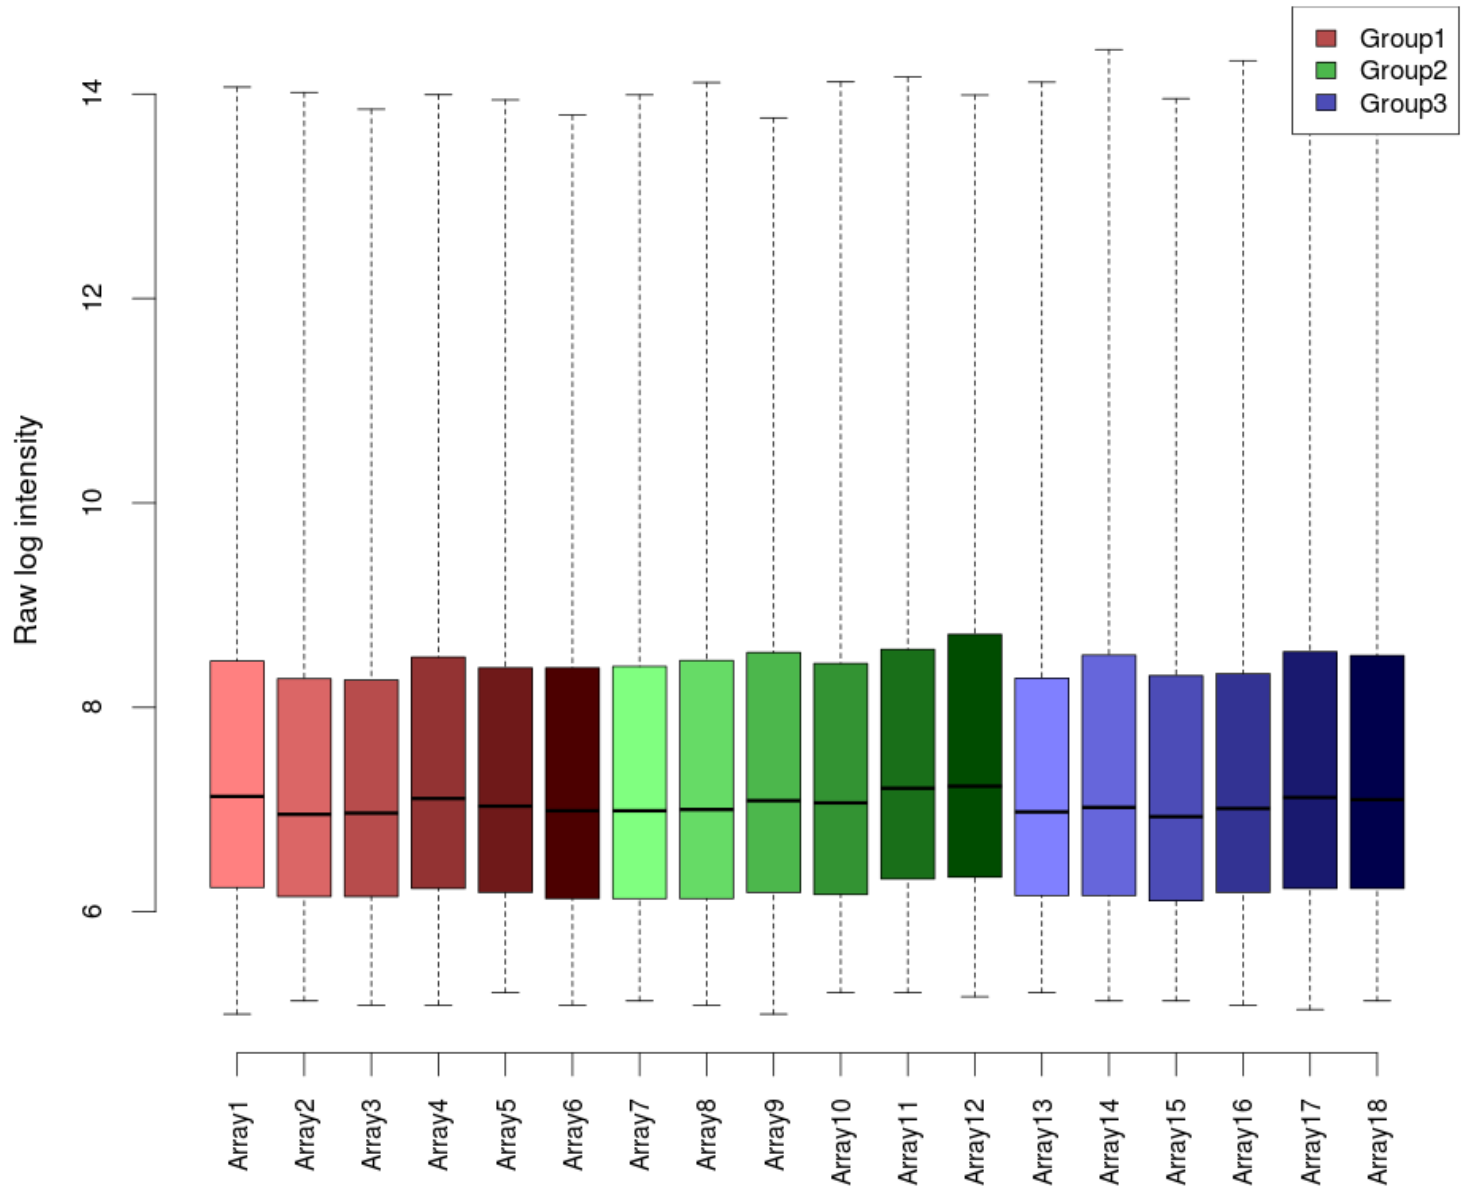

# Density histogram of raw intensities

Curves should be comparable between arrays

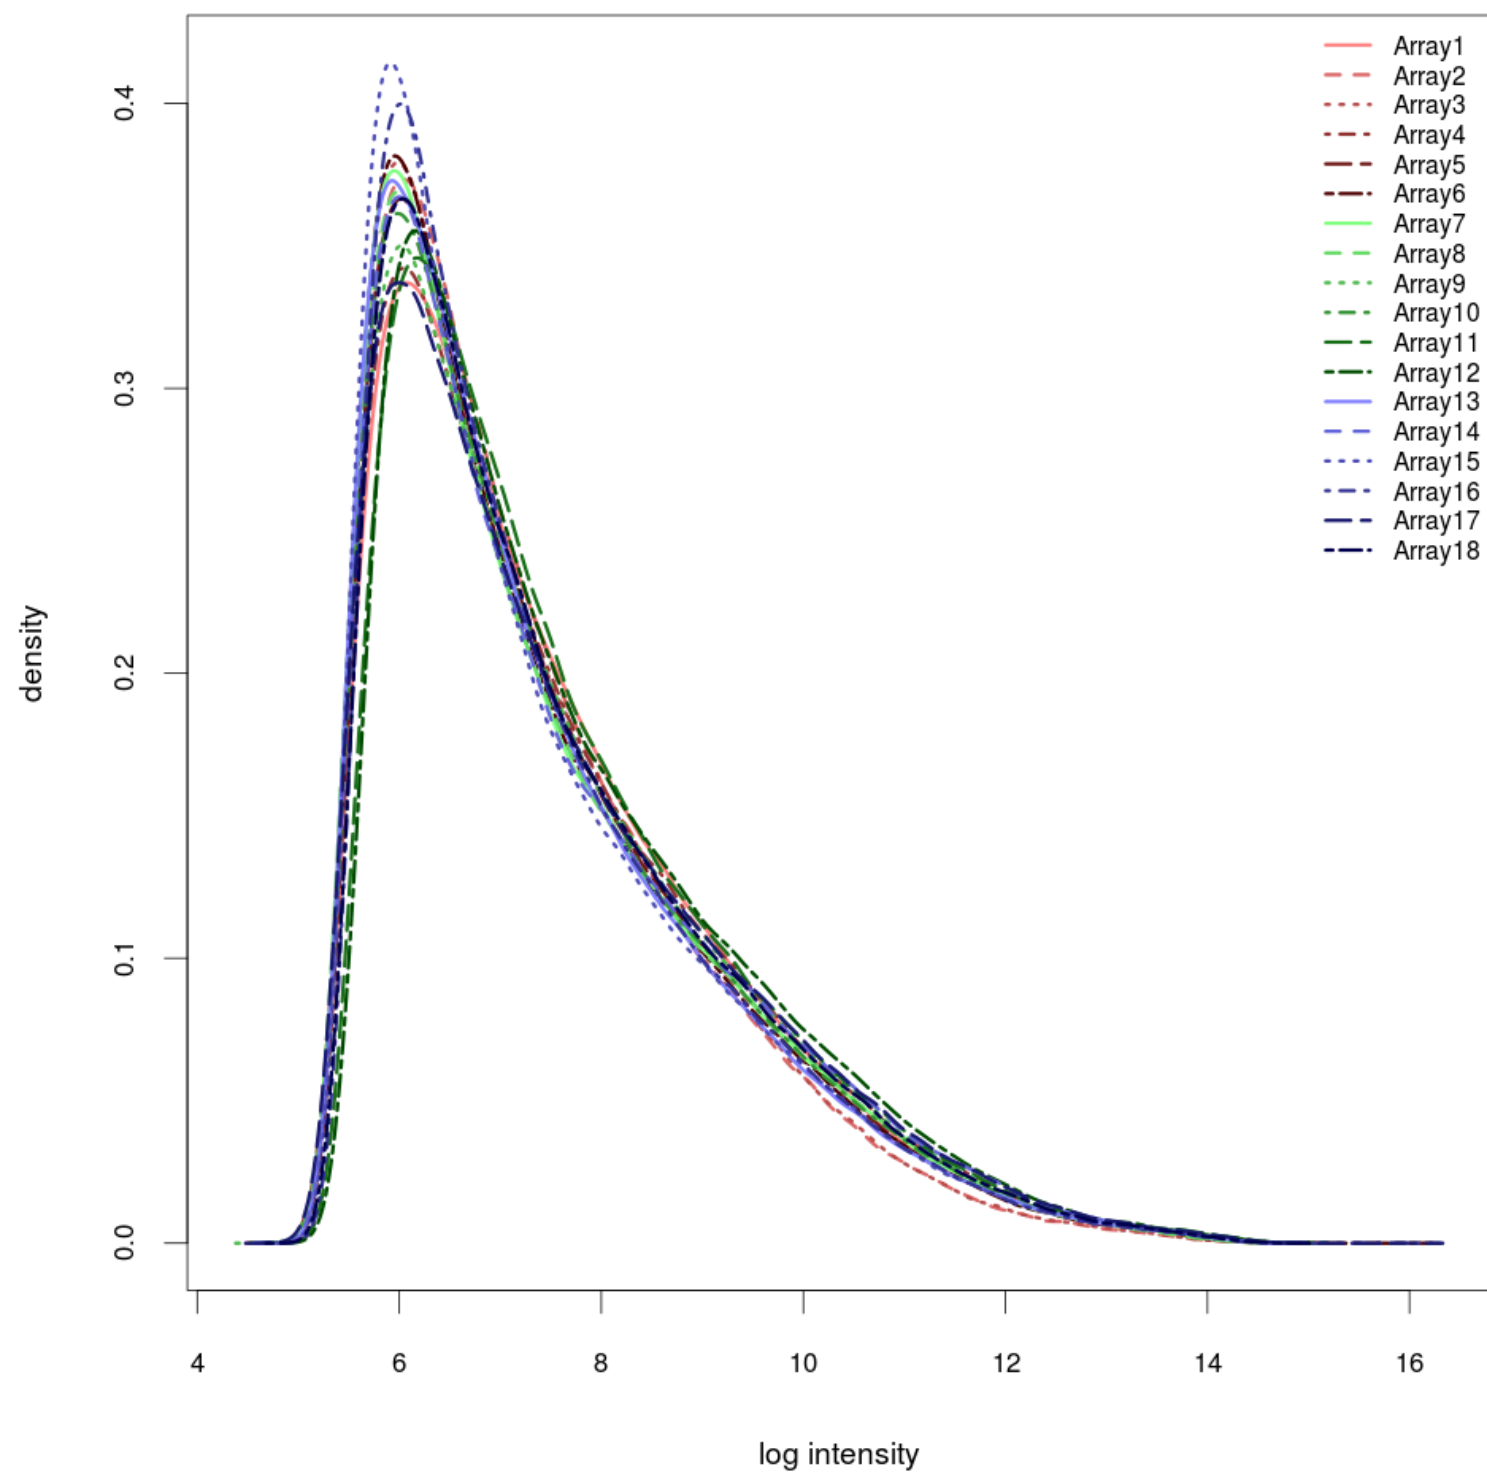

# MA plots of raw data 1 / 2

Array1 vs pseudo-median reference chip

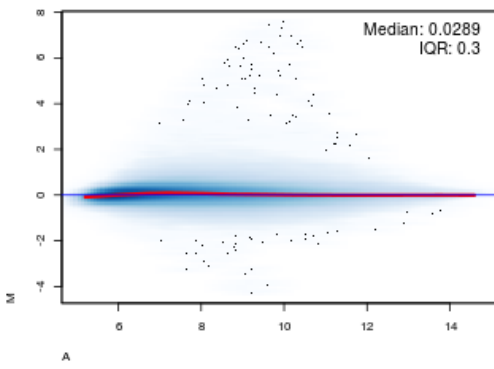

Array2 vs pseudo-median reference chip

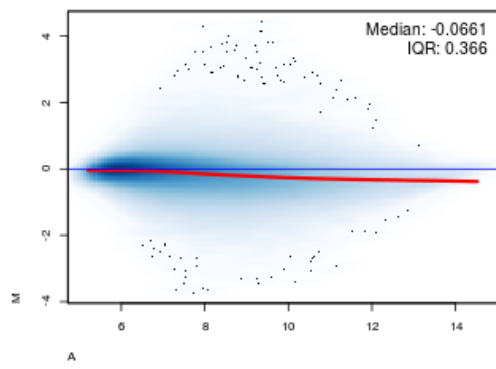

Array3 vs pseudo-median reference chip

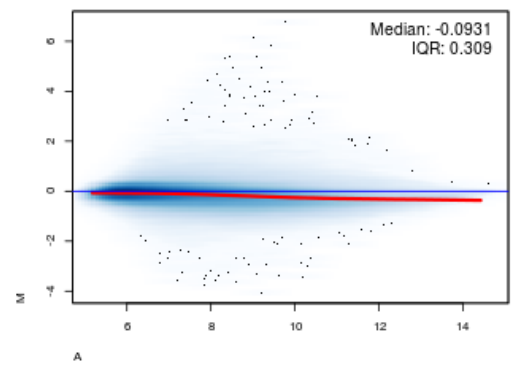

Array4 vs pseudo-median reference chip

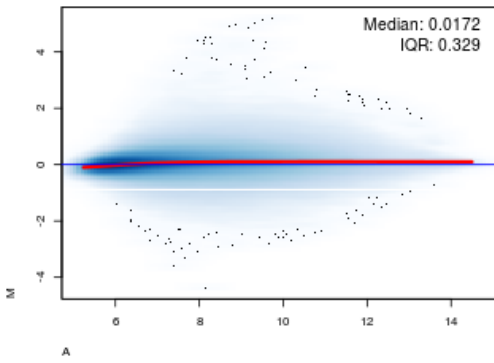

Array5 vs pseudo-median reference chip

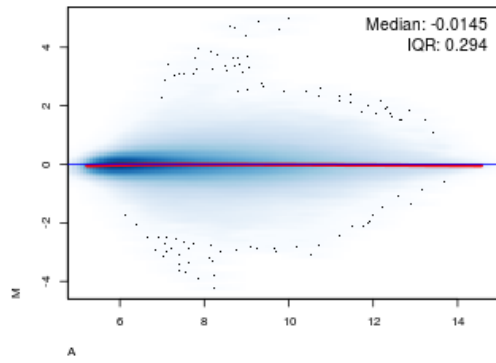

Array6 vs pseudo-median reference chip

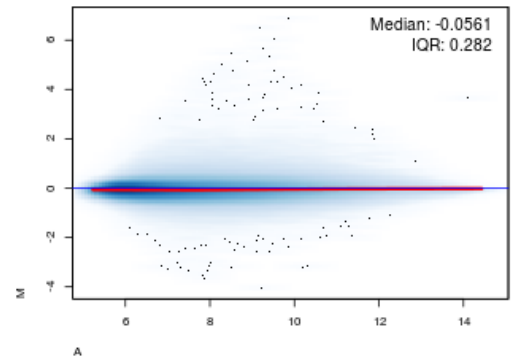

Array7 vs pseudo-median reference chip

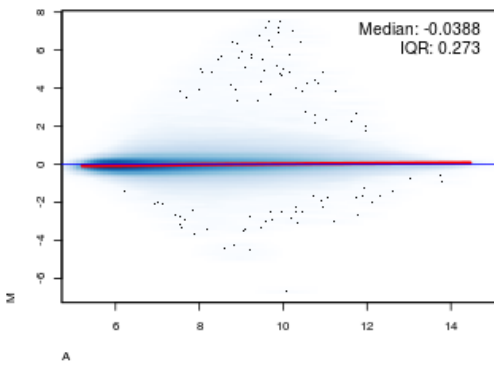

Array8 vs pseudo-median reference chip

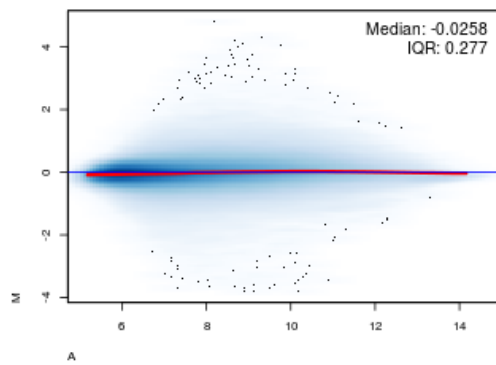

Array9 vs pseudo-median reference chip

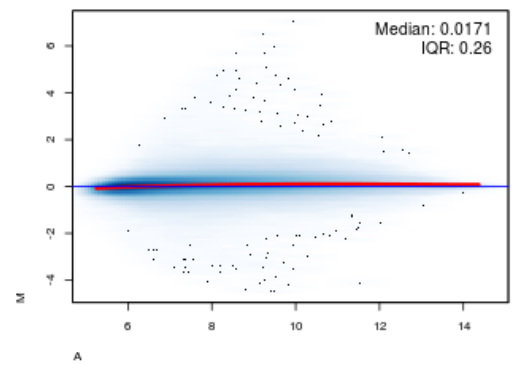

Array10 vs pseudo-median reference chip

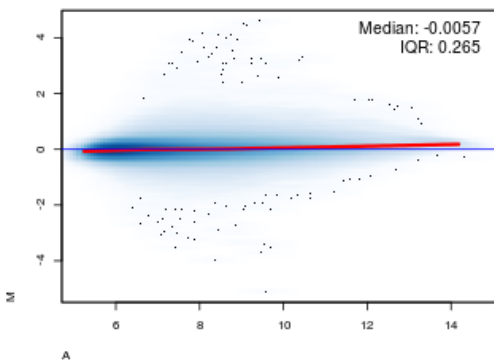

Array11 vs pseudo-median reference chip

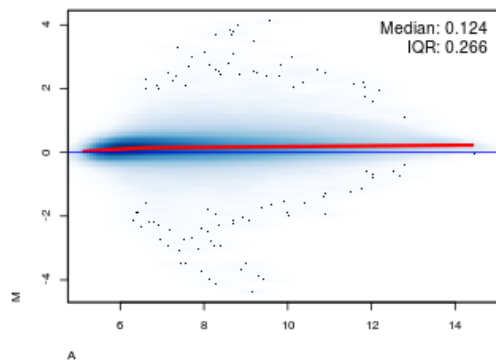

Array12 vs pseudo-median reference chip

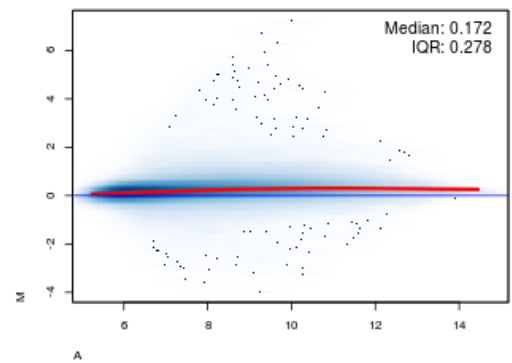

Array13 vs pseudo-median reference chip

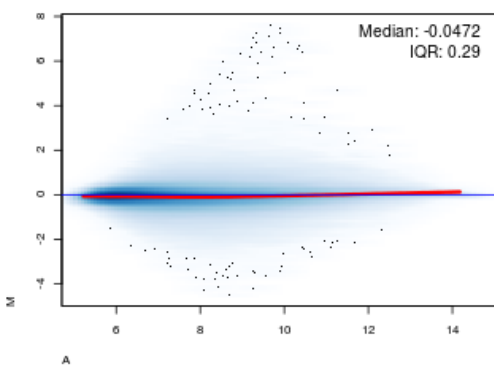

Array14 vs pseudo-median reference chip

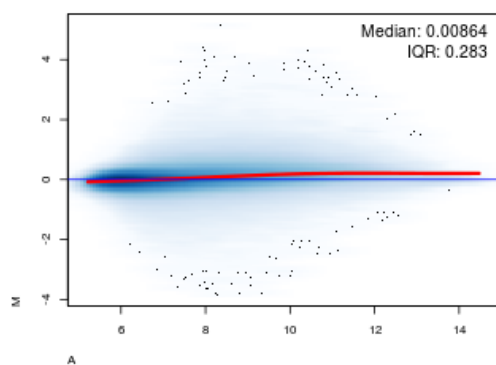

Array15 vs pseudo-median reference chip

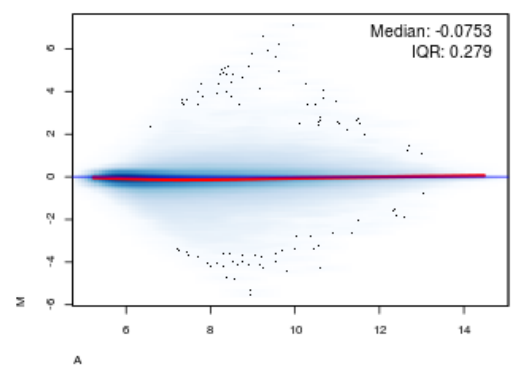



MA plots of raw data 2 / 2

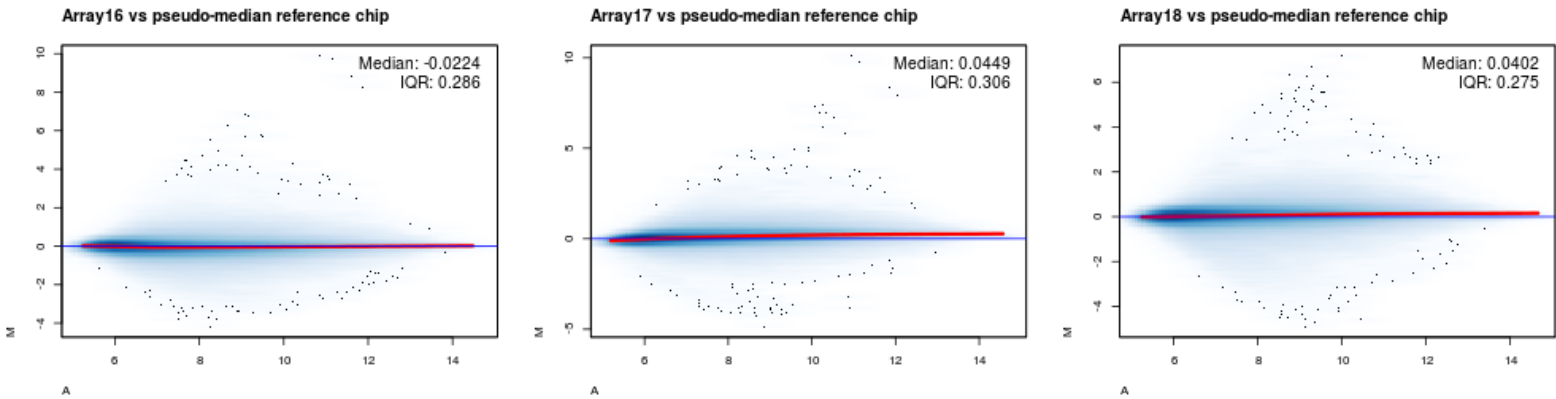



## 2D virtual PLM image for model characteristic: resid 1 / 3

Array1

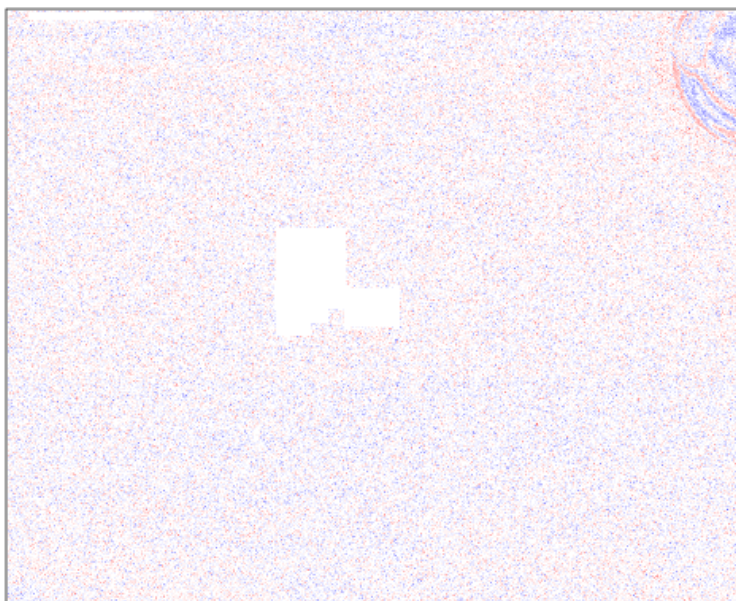

Array2

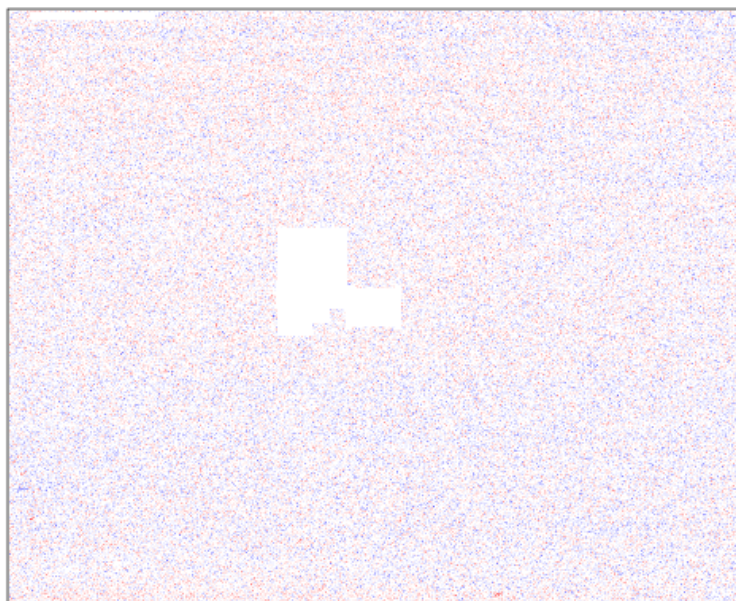

Array3

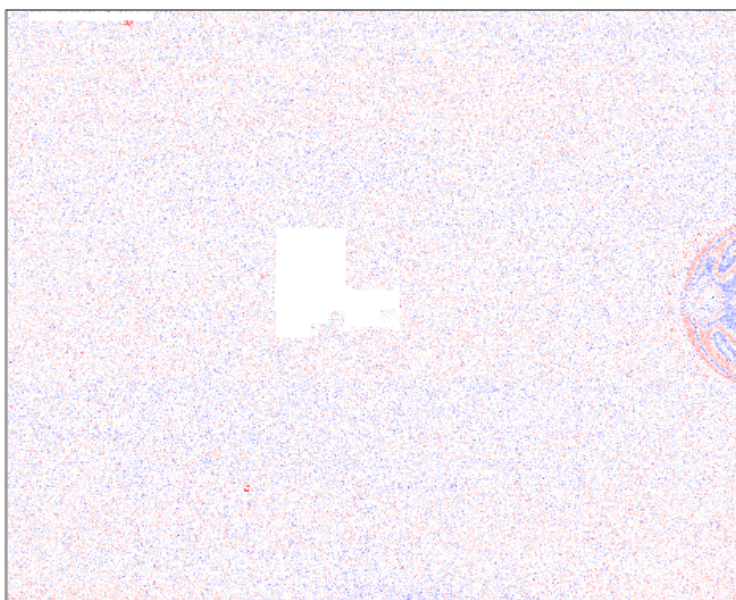

Array4

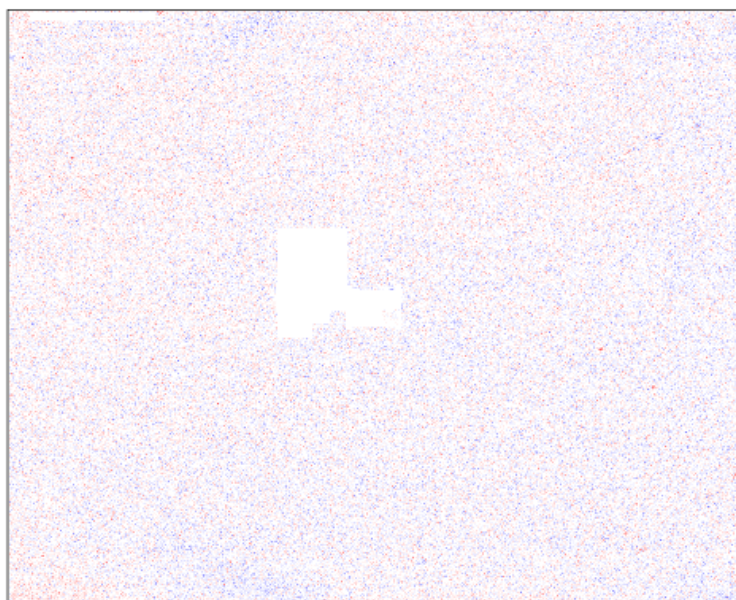

Array5

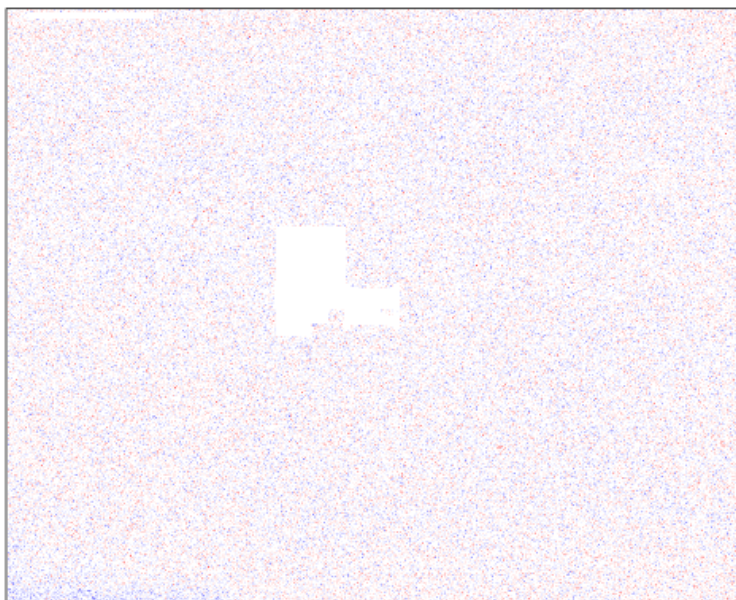

Array6

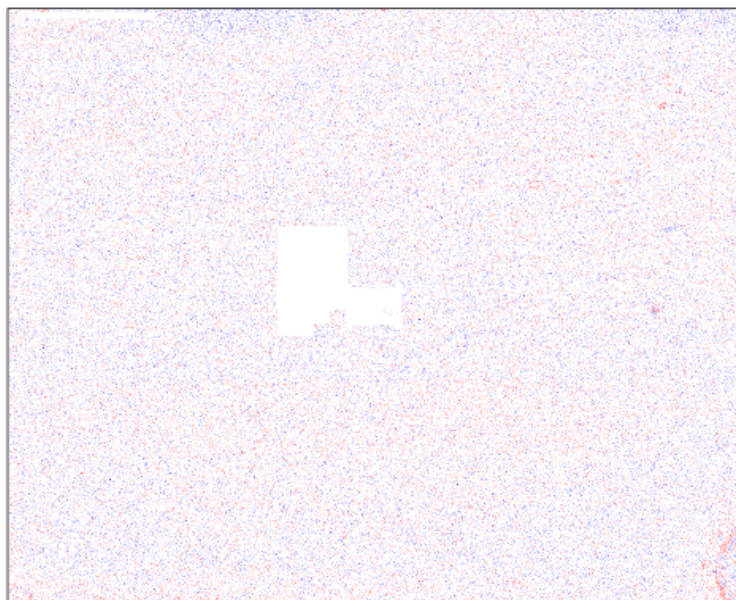



## 2D virtual PLM image for model characteristic: resid 2 / 3

Array7

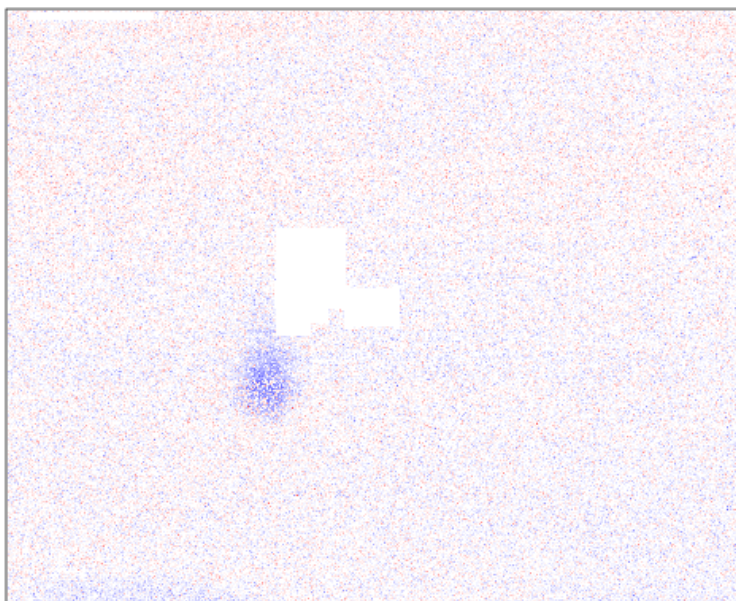

Array8

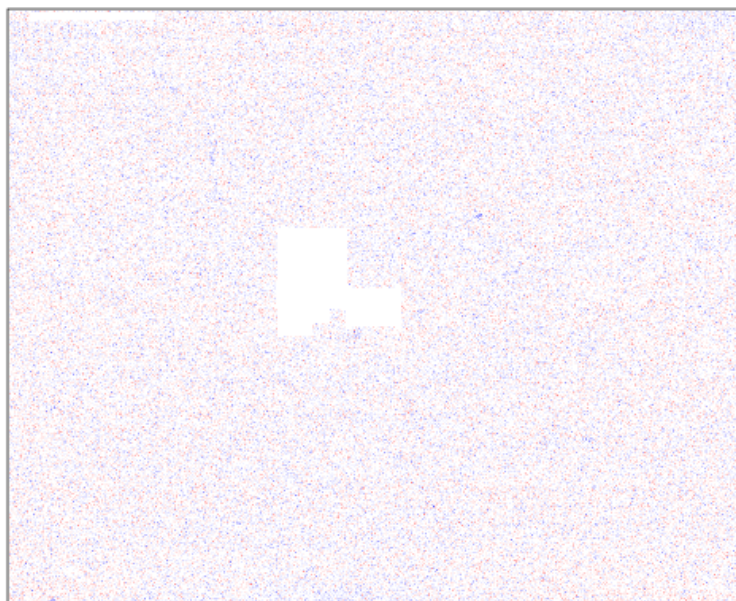

Array9

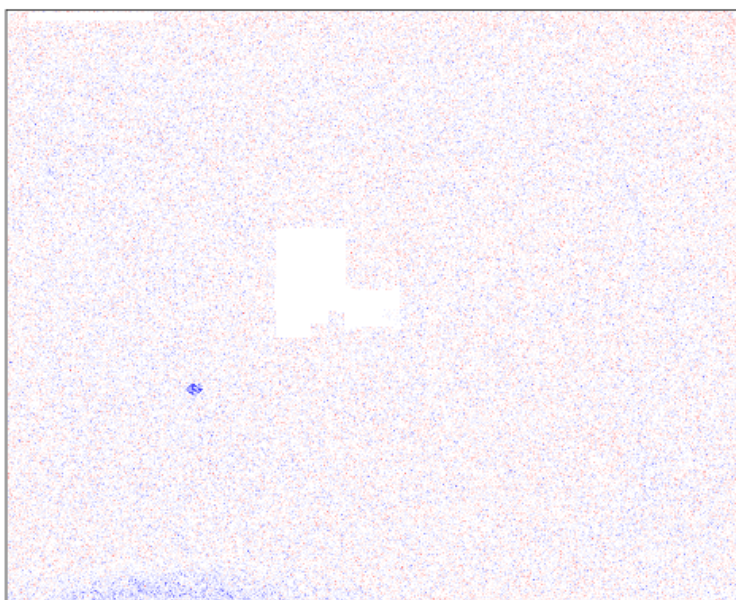

Array10

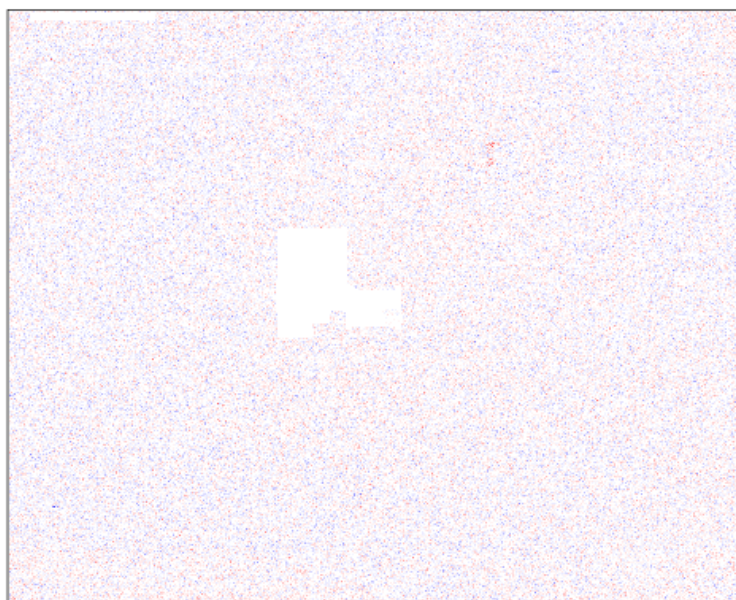

Array11

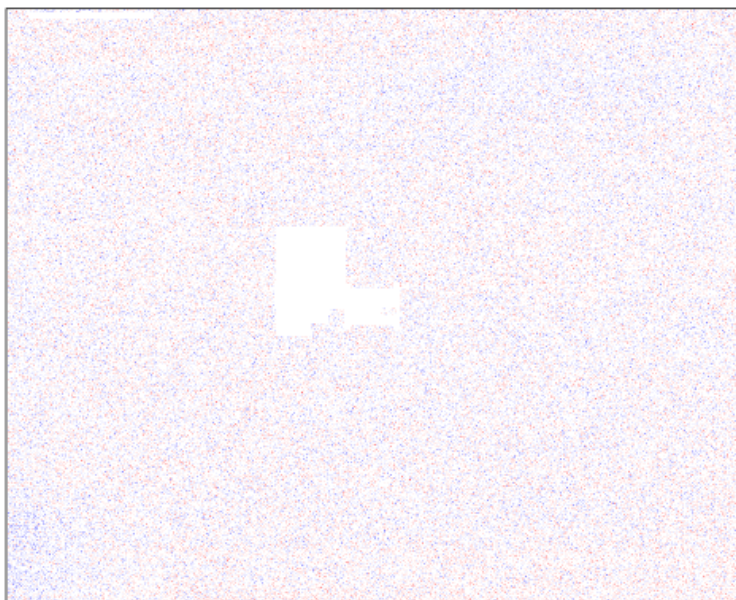

Array12

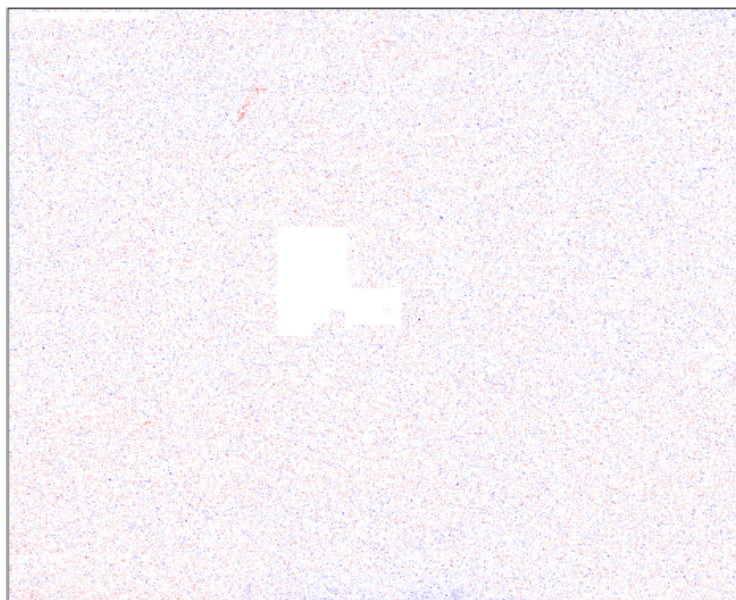



## 2D virtual PLM image for model characteristic: resid 3 / 3

Array13

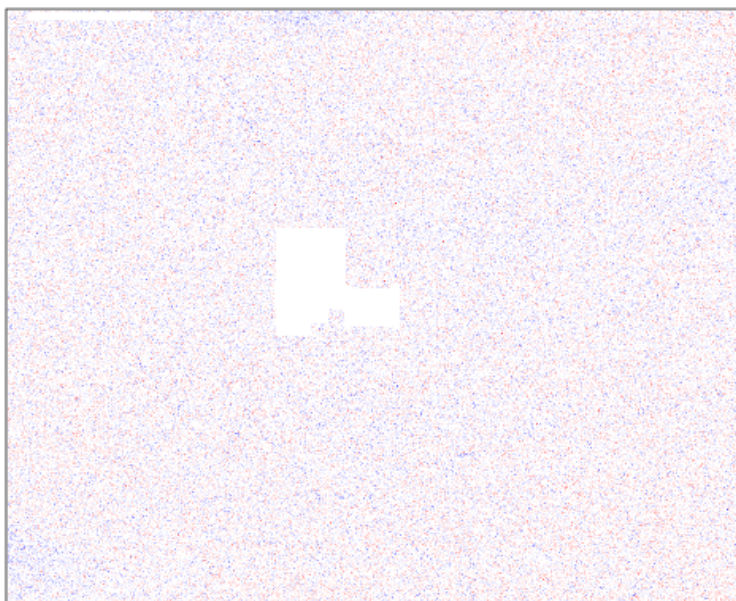

Array14

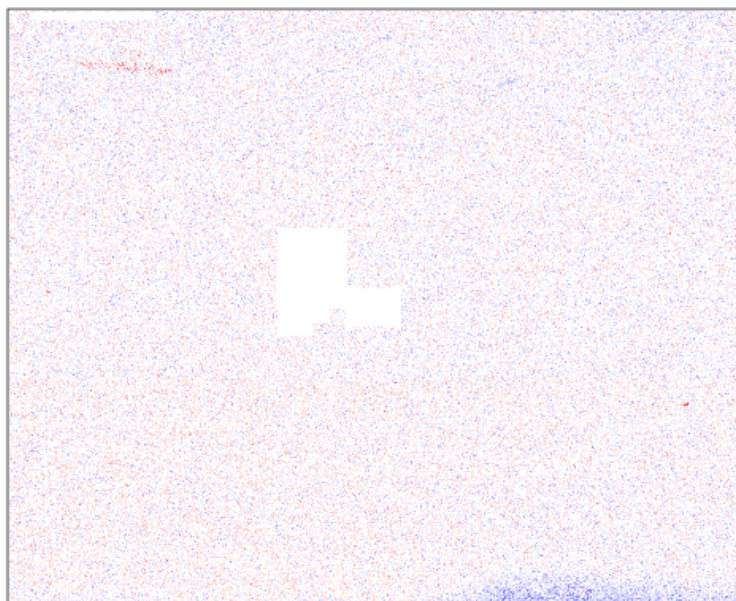

Array15

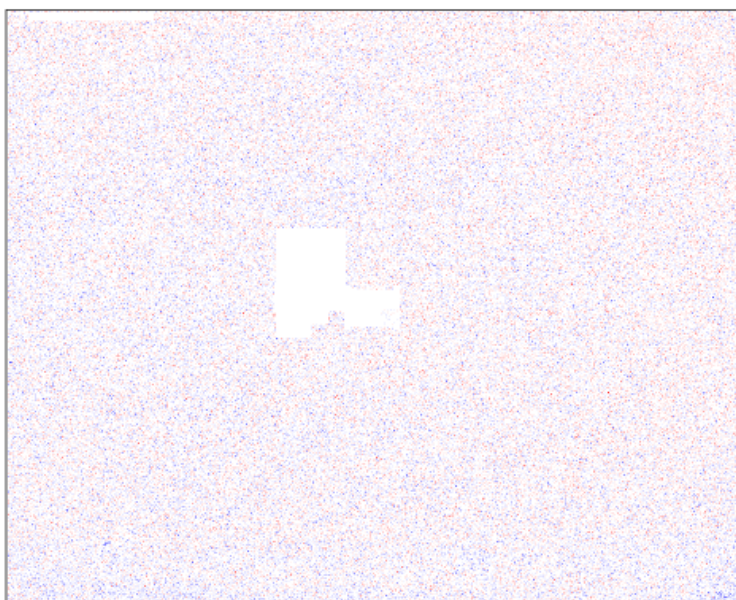

Array16

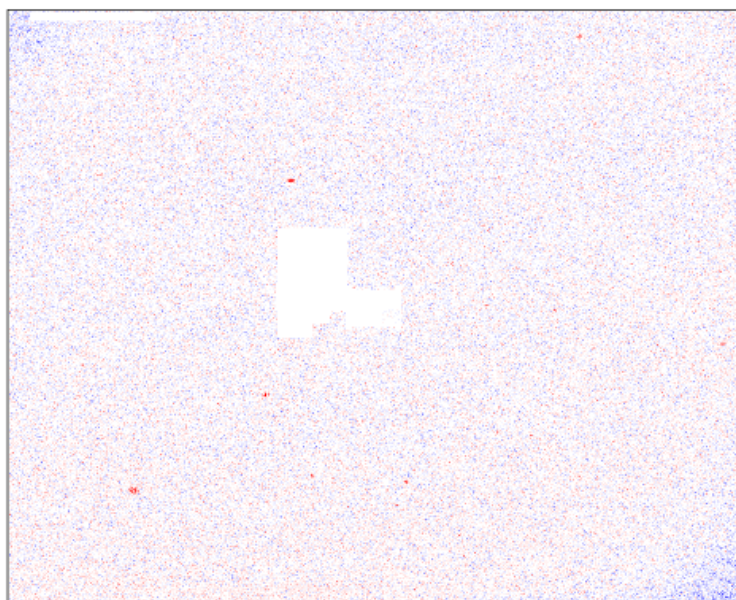

Array17

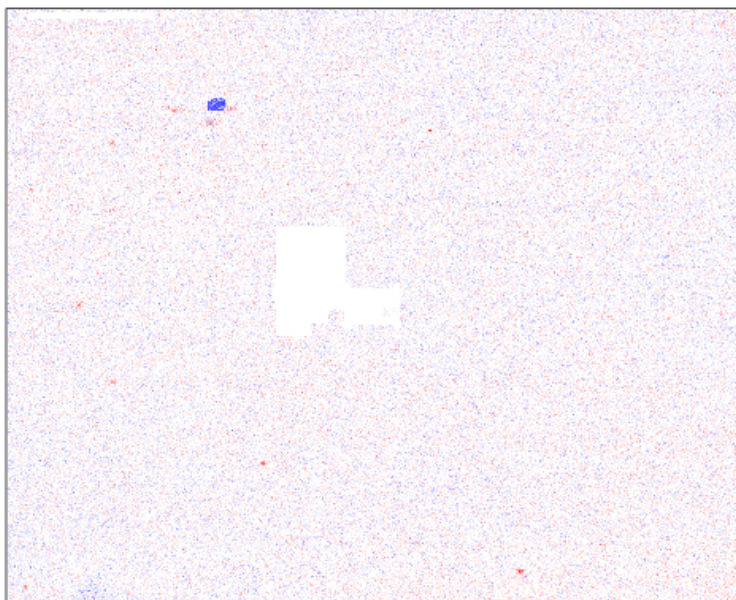

Array18

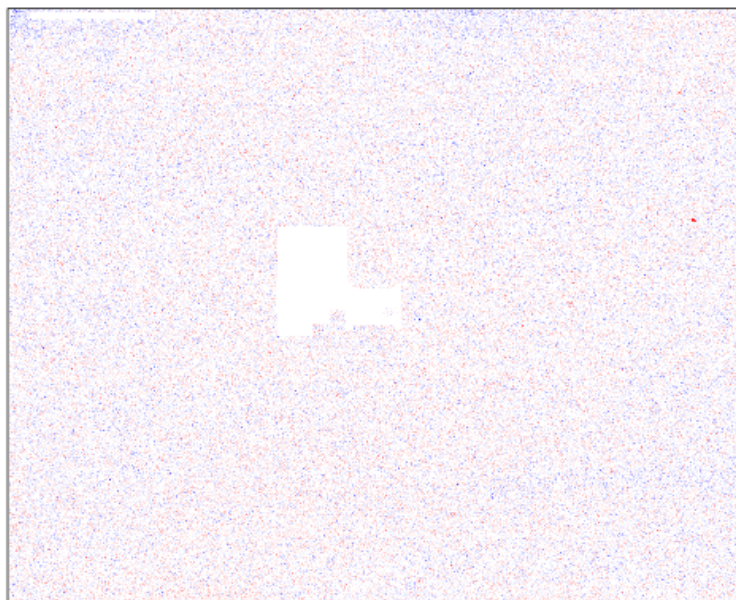



# Normalized Unscaled Standard Errors (NUSE)

NUSE median value should be < 1.1

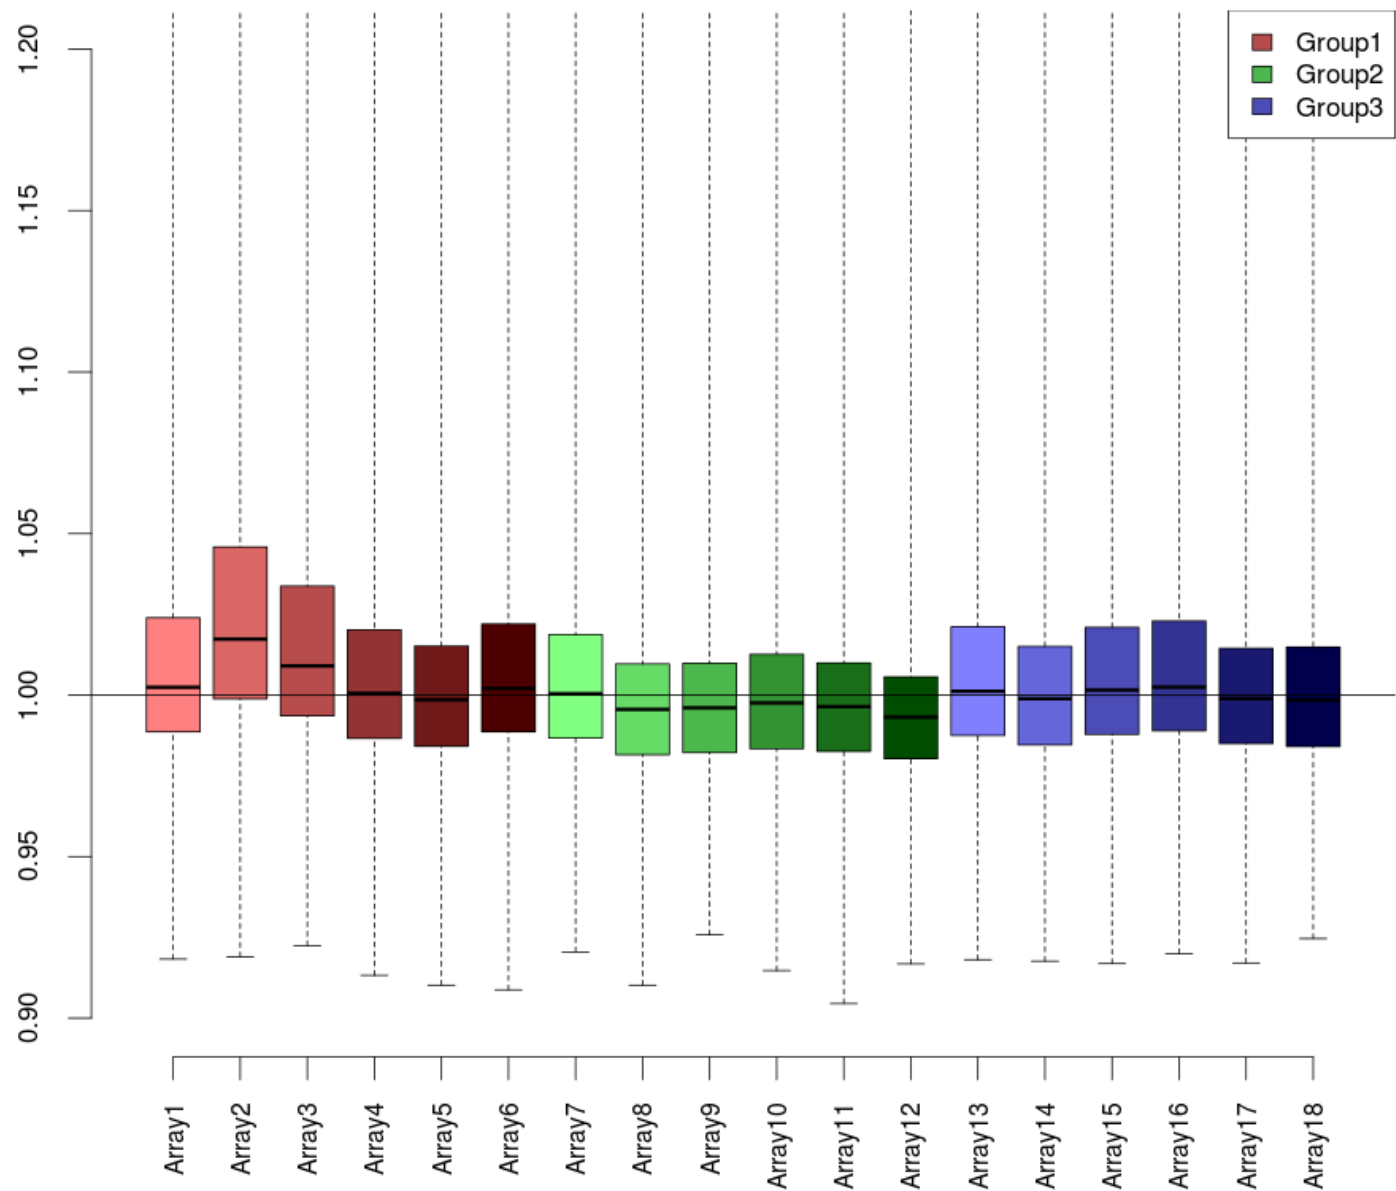

# Relative Log Expression (RLE)

RLE distributions should be centered around 0

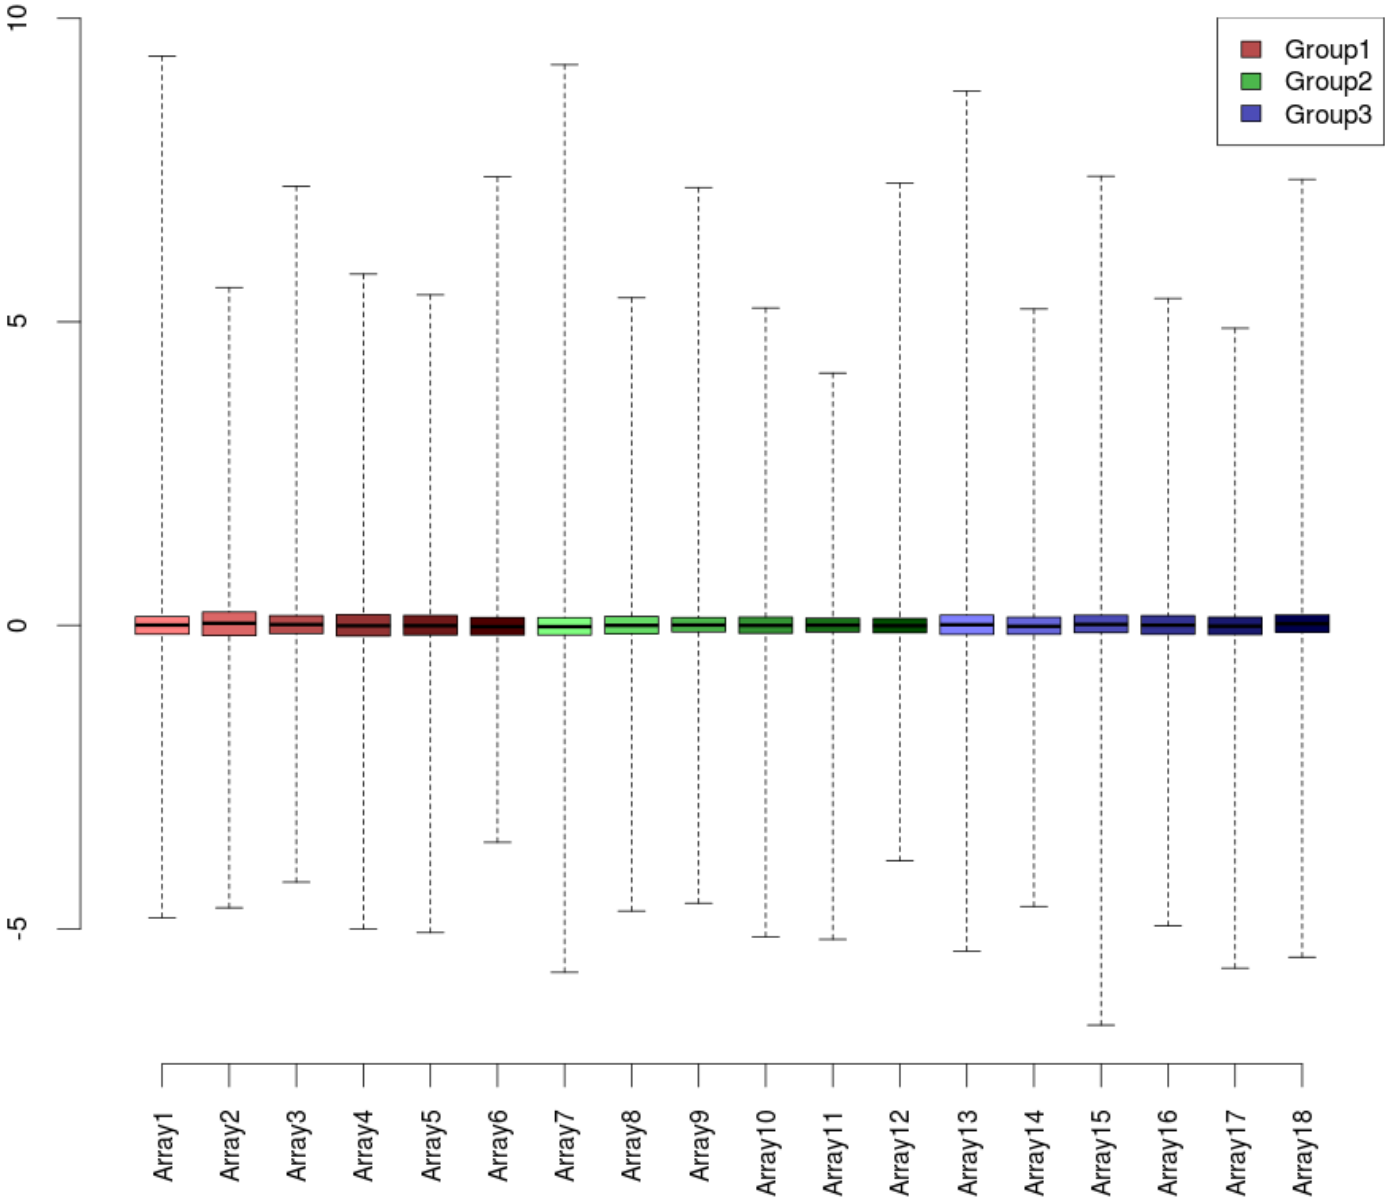

Heatmap visualization of the correlation matrix for 18 arrays. The color scale ranges from dark blue (low correlation) to dark red (high correlation). The diagonal is dark red, indicating perfect self-correlation. The matrix is symmetric. The arrays are ordered as follows: Array9, Array12, Array6, Array3, Array8, Array2, Array1, Array7, Array4, Array5, Array10, Array11, Array16, Array17, Array13, Array14, Array18, Array15.

# PCA analysis of Raw data

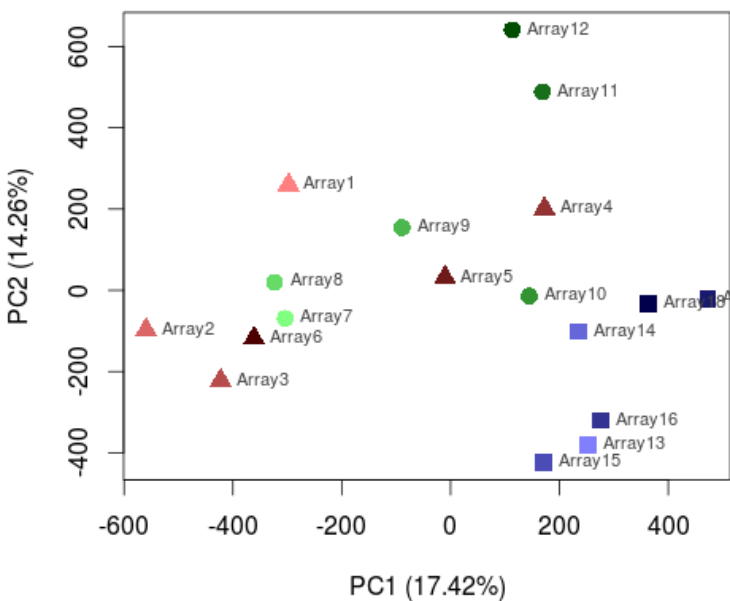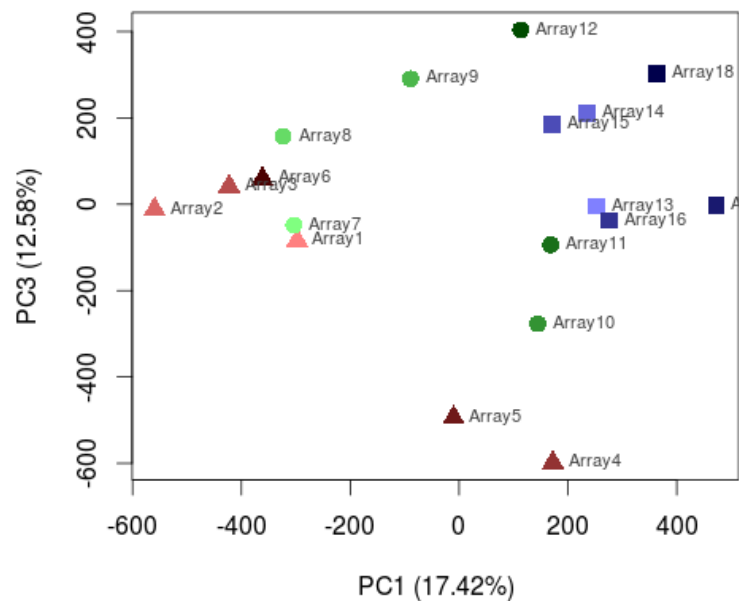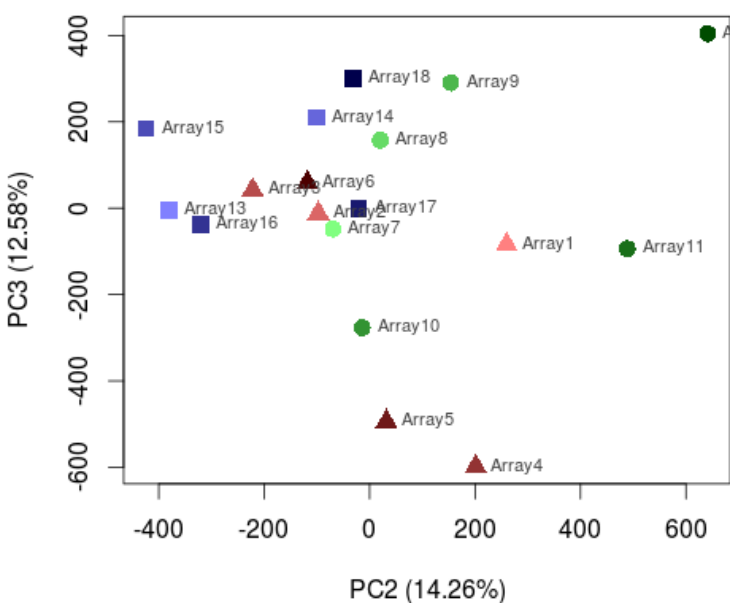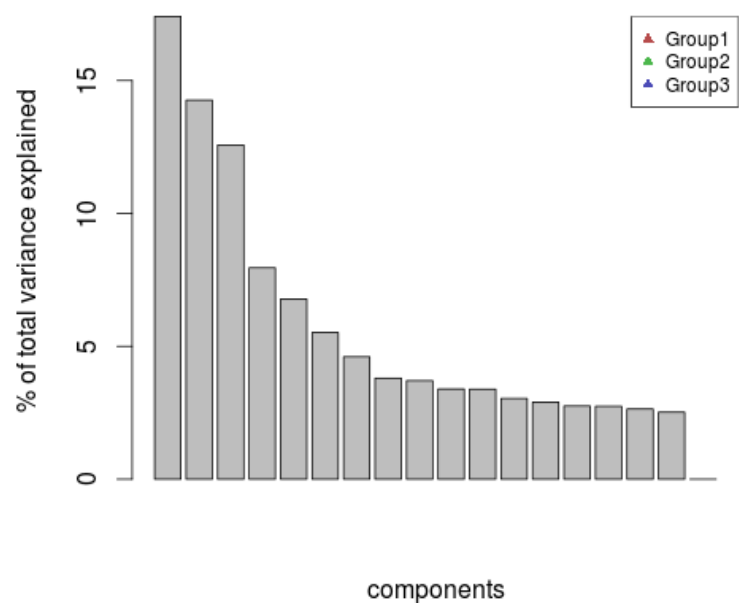



Cluster dendrogram of raw data

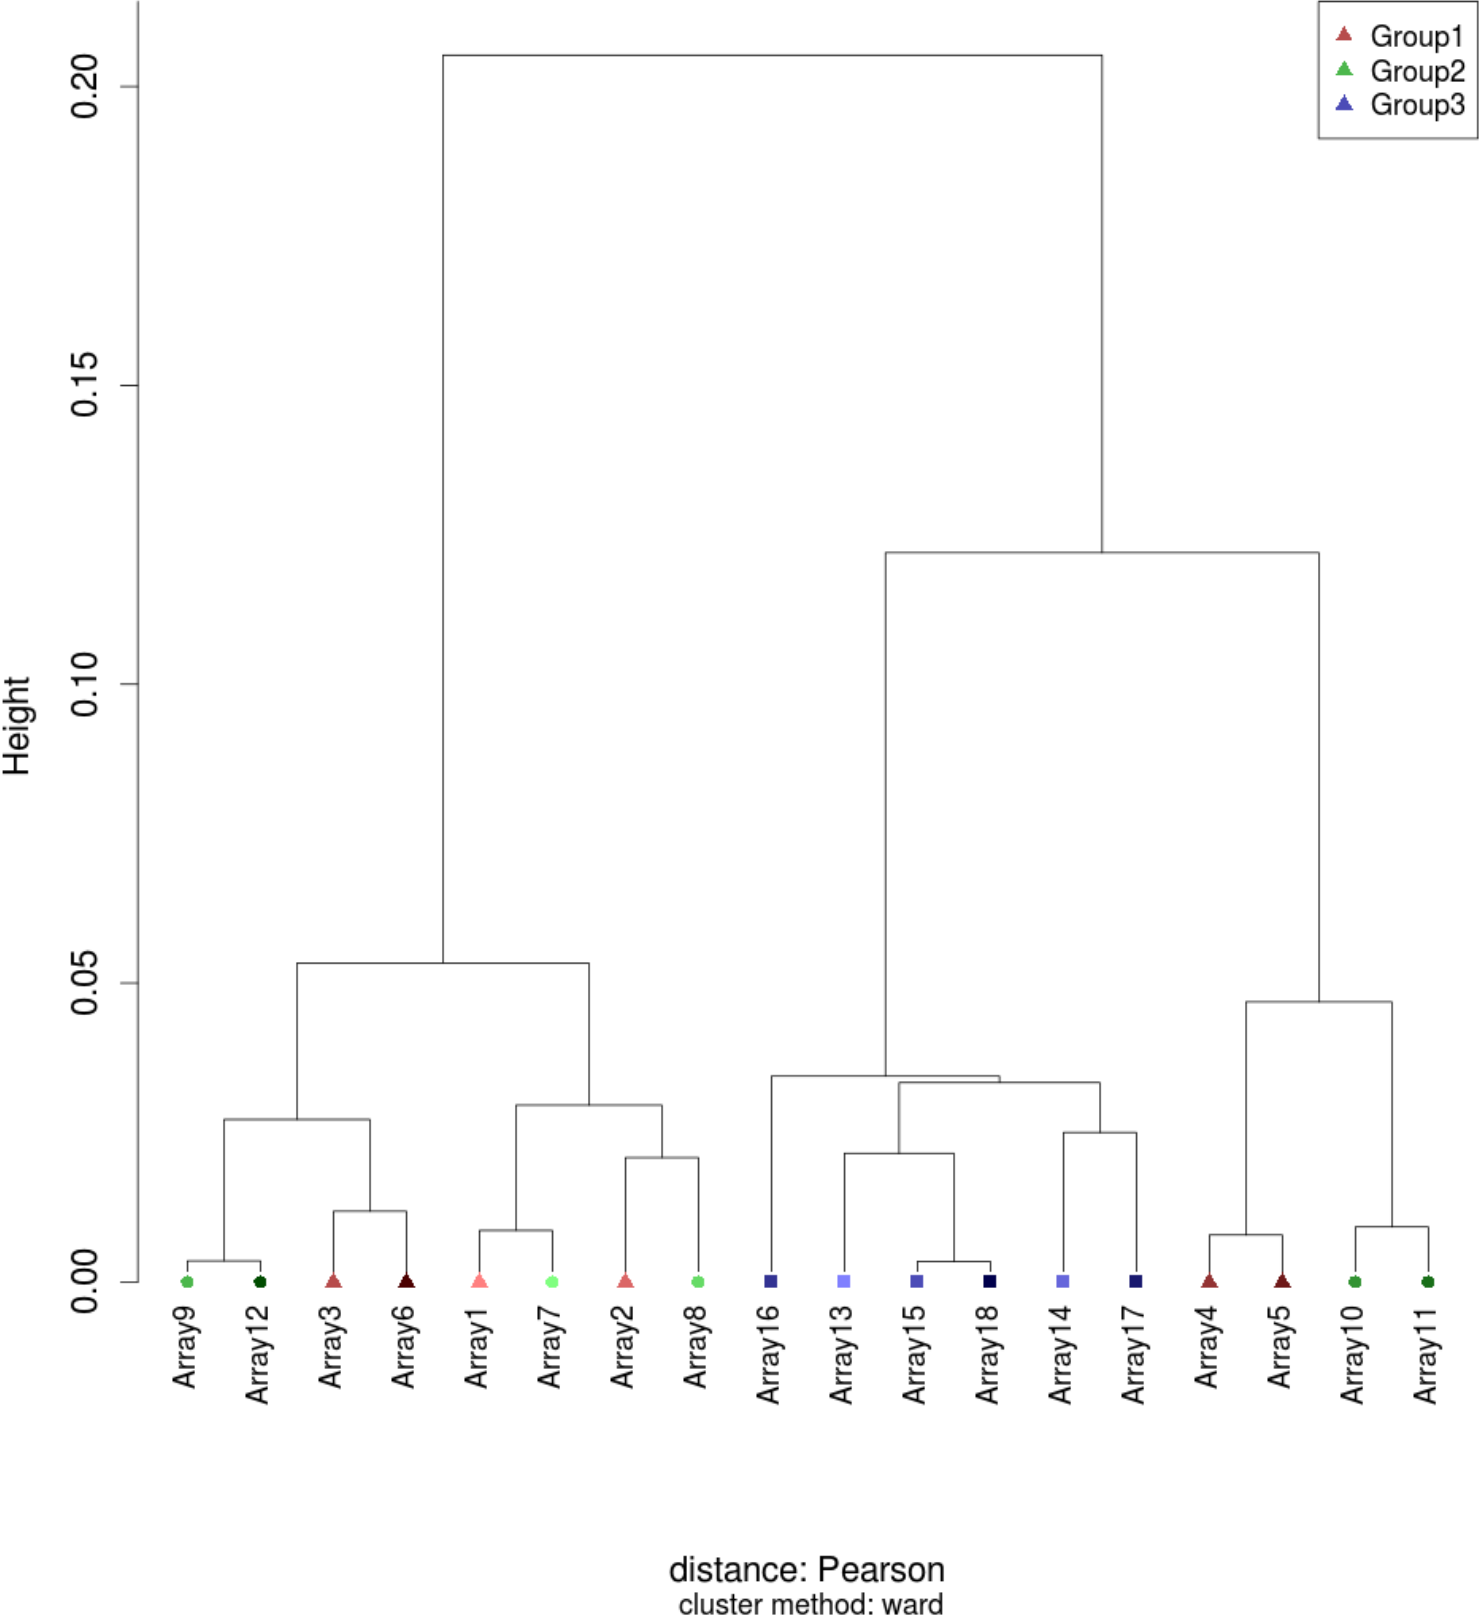

## Pre-processing of Raw Data

Method: GCRMA

Annotation: primeview\_Hs\_ENSG

# Boxplot after GCRMA

Distributions should be comparable between arrays

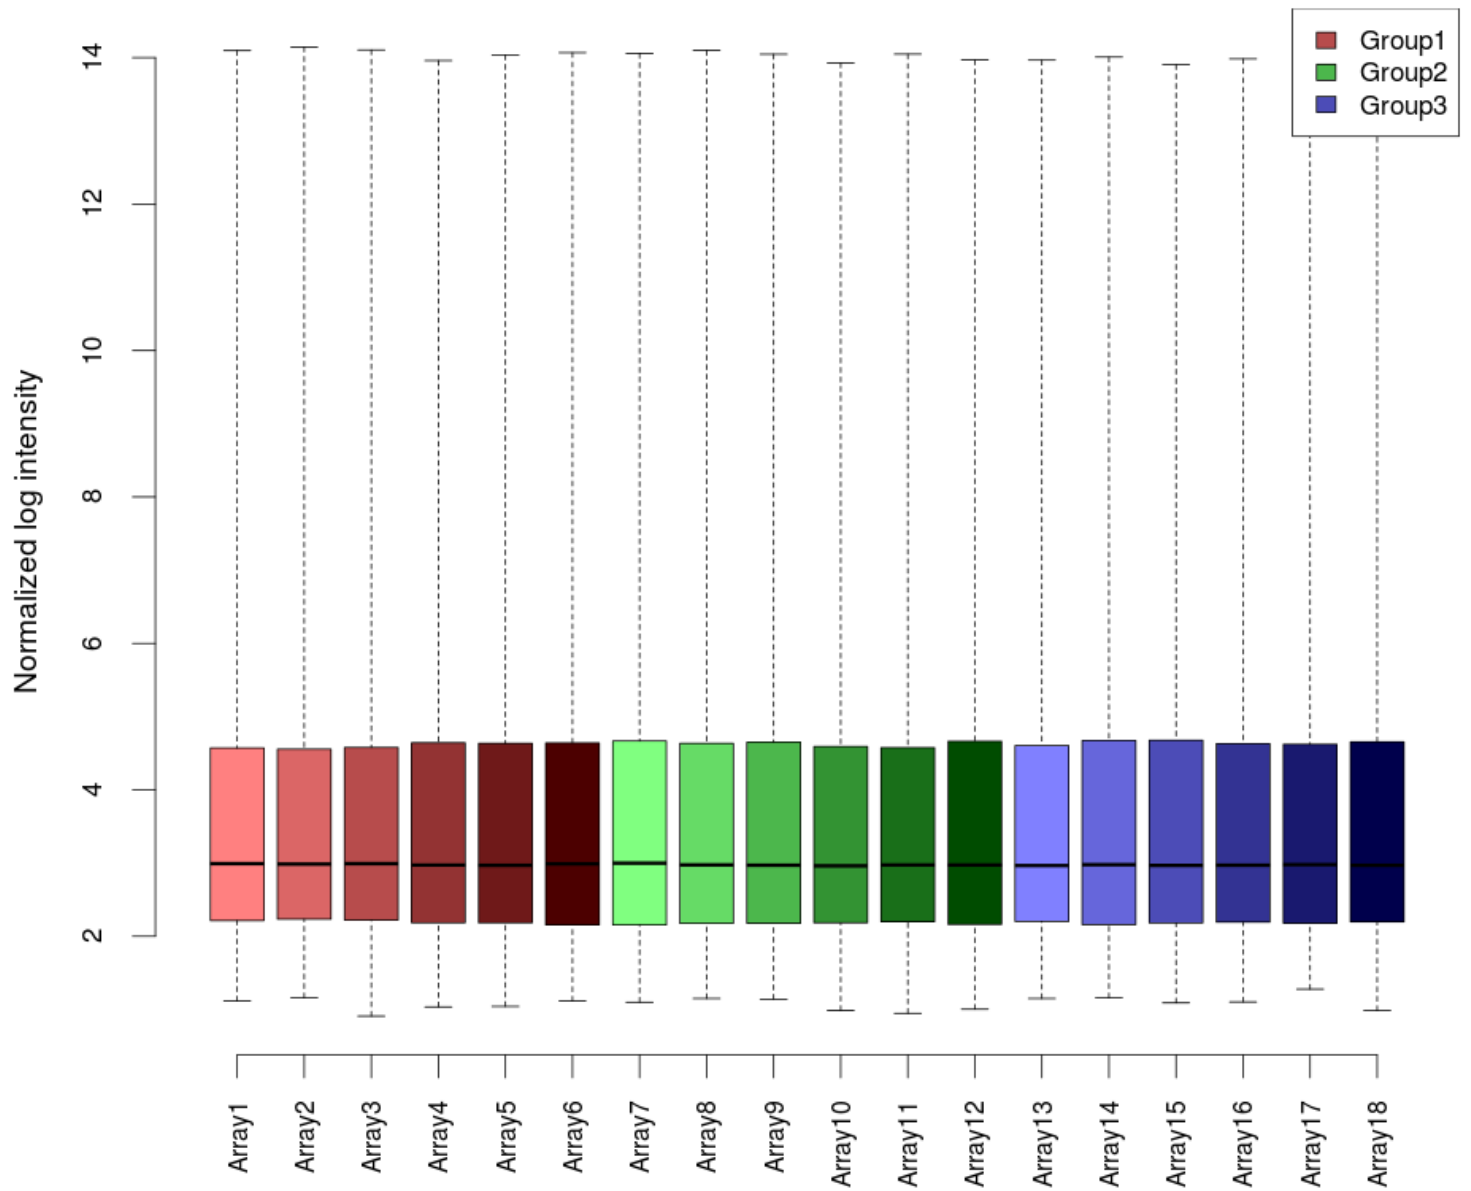

# Density histogram after GCRMA

Curves should be comparable between arrays

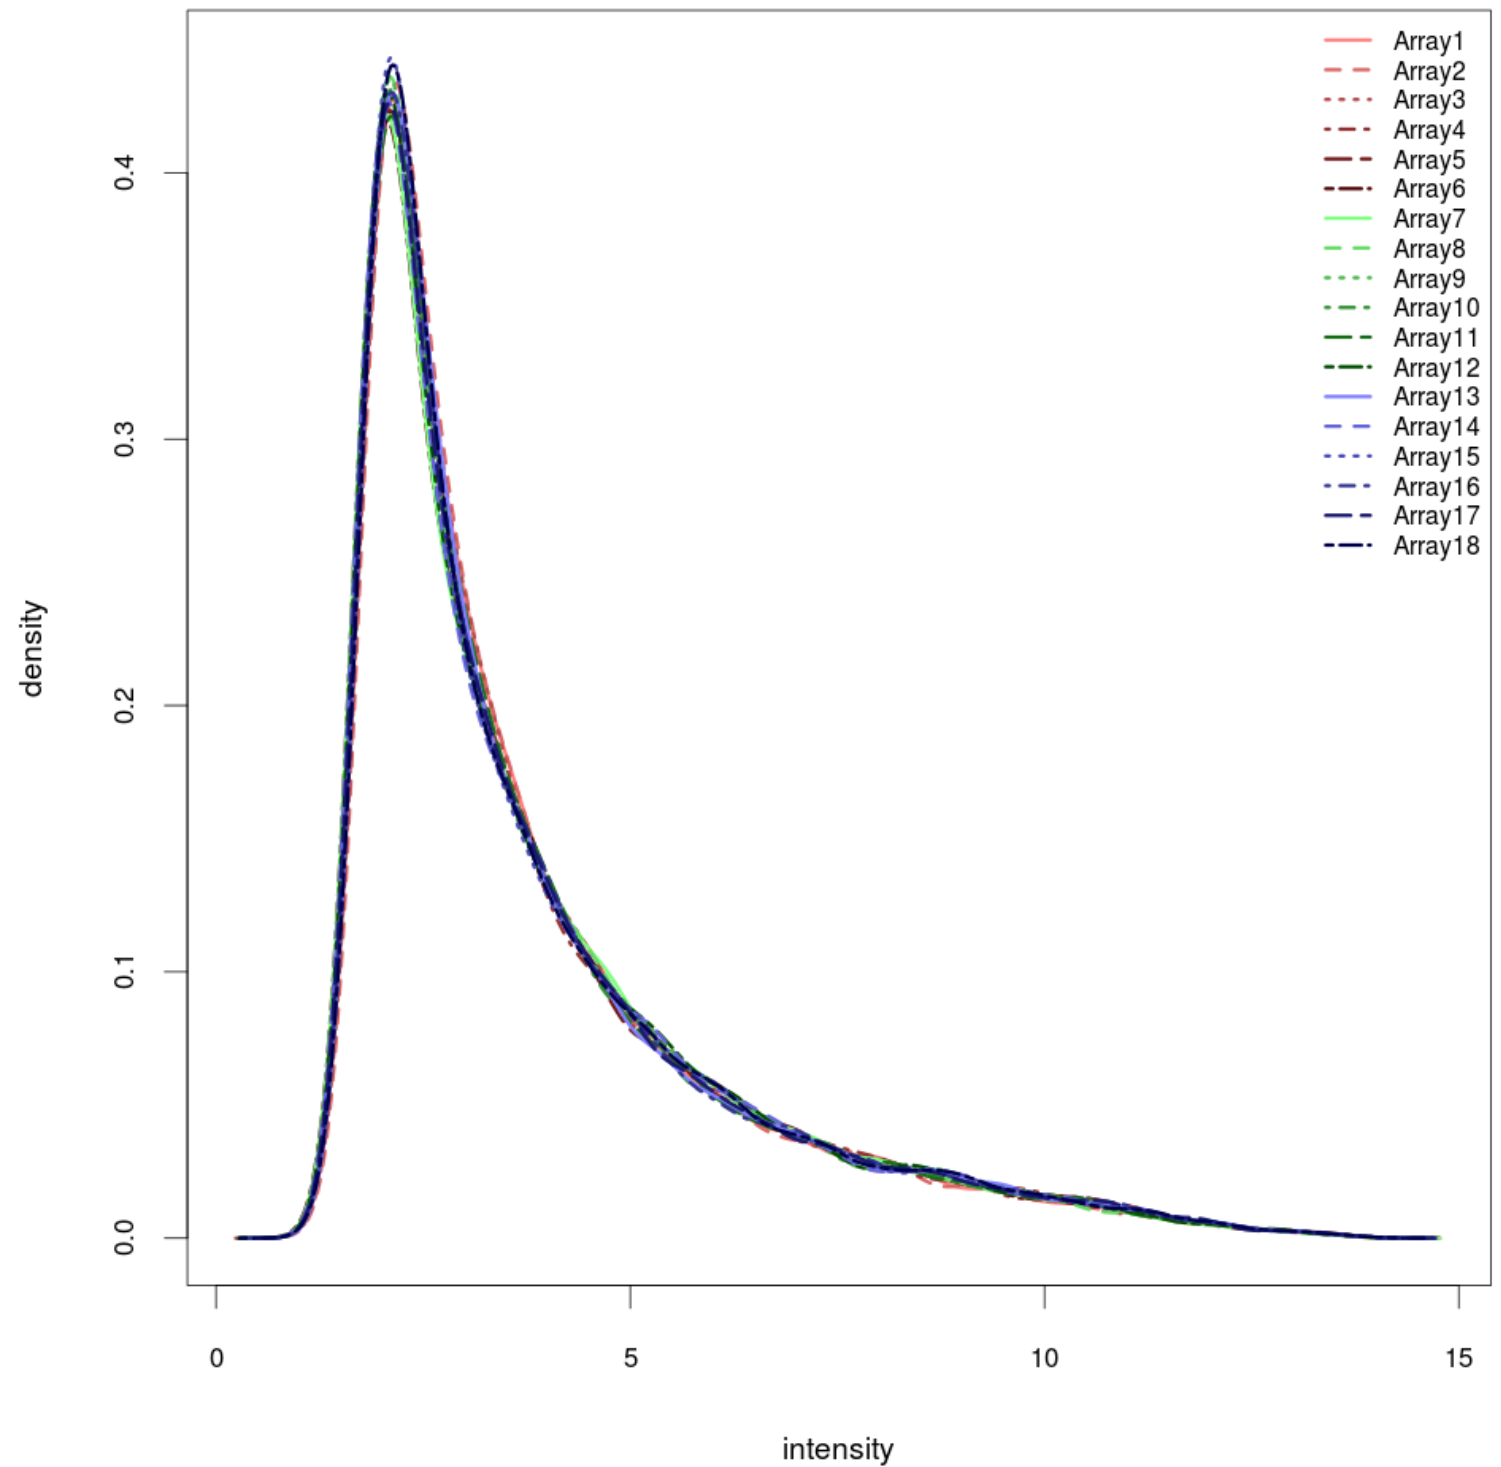

# MA plots after GCRMA normalization 1 / 2

Array1 vs pseudo-median reference chip

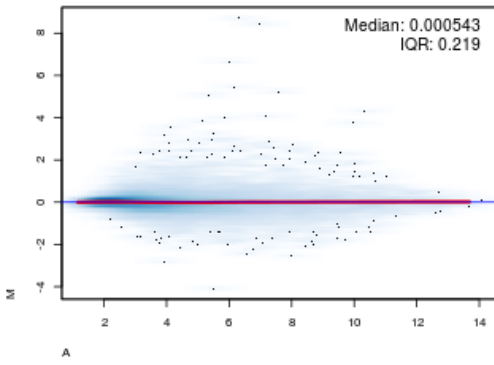

Array2 vs pseudo-median reference chip

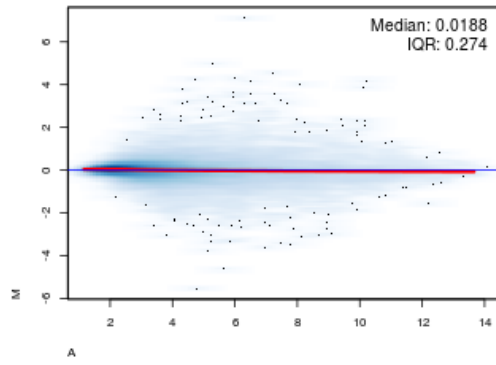

Array3 vs pseudo-median reference chip

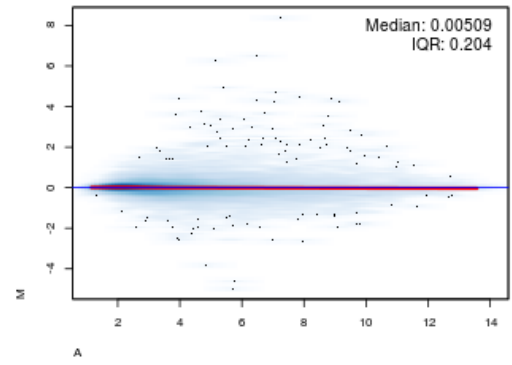

Array4 vs pseudo-median reference chip

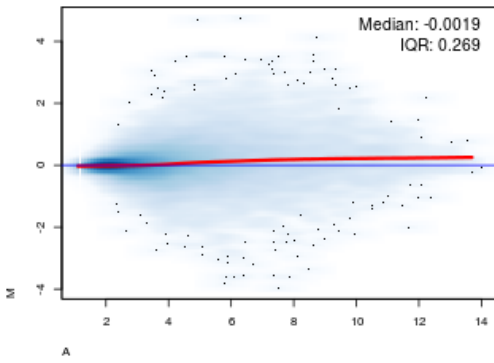

Array5 vs pseudo-median reference chip

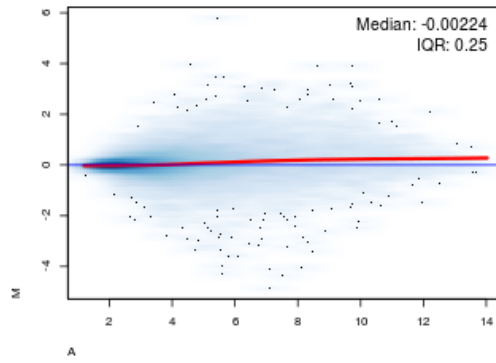

Array6 vs pseudo-median reference chip

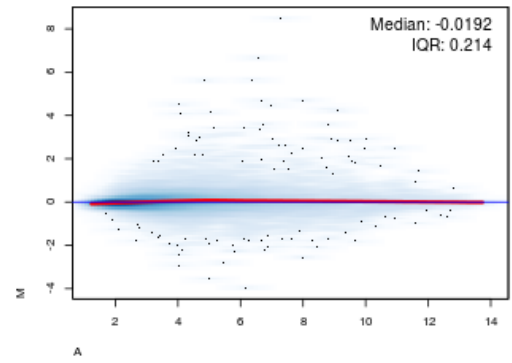

Array7 vs pseudo-median reference chip

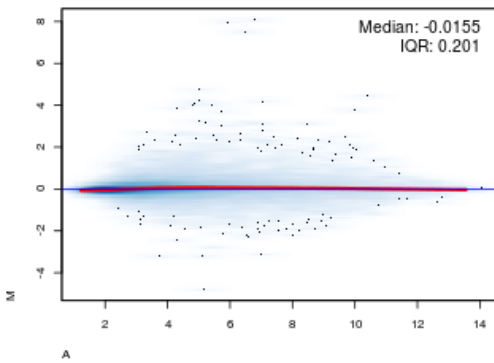

Array8 vs pseudo-median reference chip

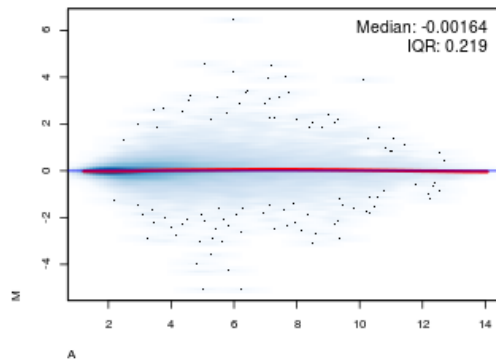

Array9 vs pseudo-median reference chip

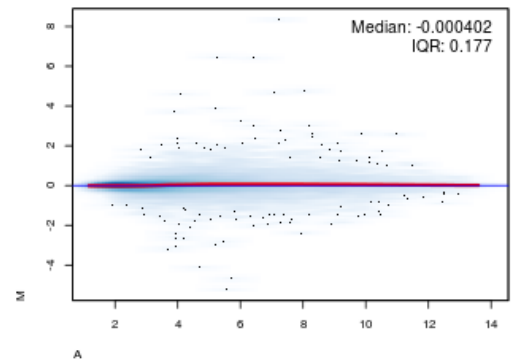

Array10 vs pseudo-median reference chip

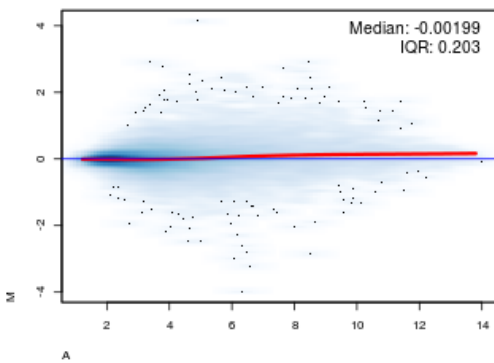

Array11 vs pseudo-median reference chip

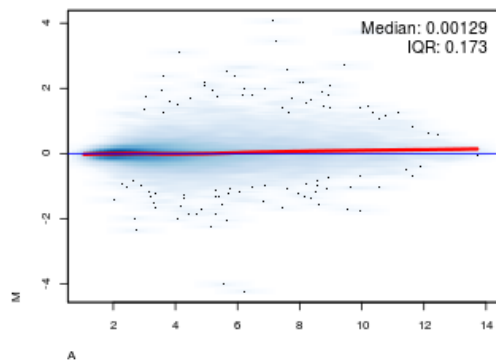

Array12 vs pseudo-median reference chip

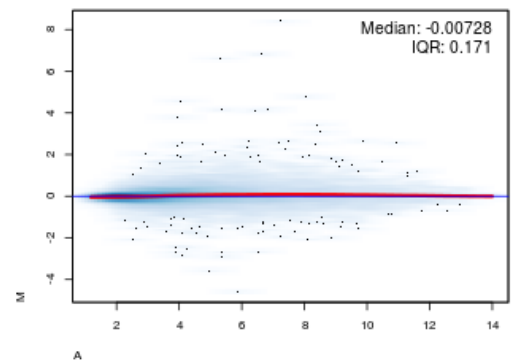

Array13 vs pseudo-median reference chip

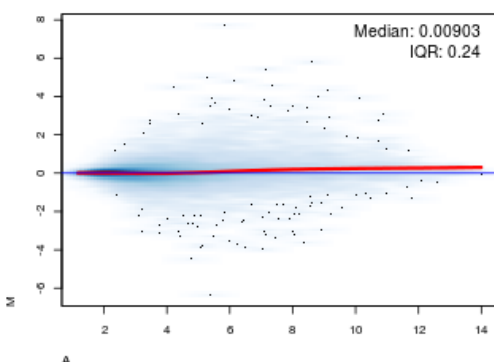

Array14 vs pseudo-median reference chip

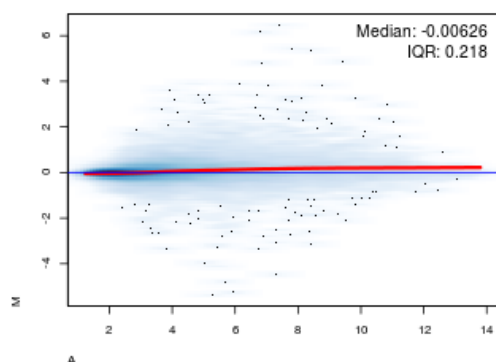

Array15 vs pseudo-median reference chip

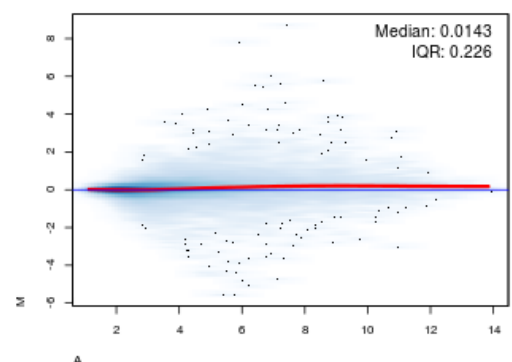

MA plots afterGCRMANormalization 2 / 2

Array16 vs pseudo-median reference chip

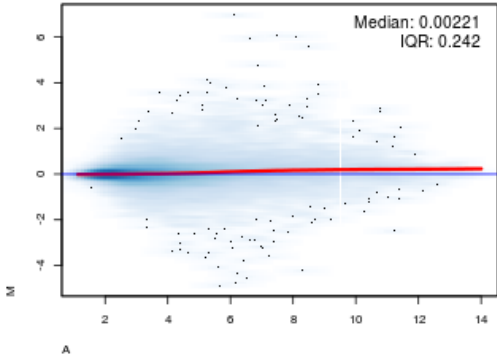

Array17 vs pseudo-median reference chip

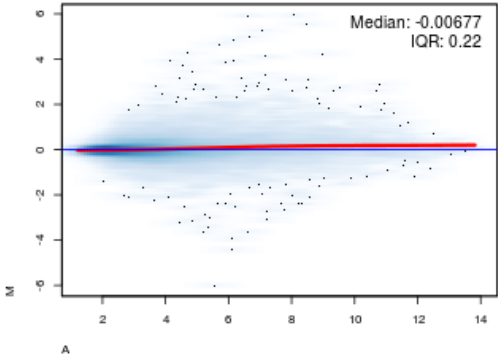

Array18 vs pseudo-median reference chip

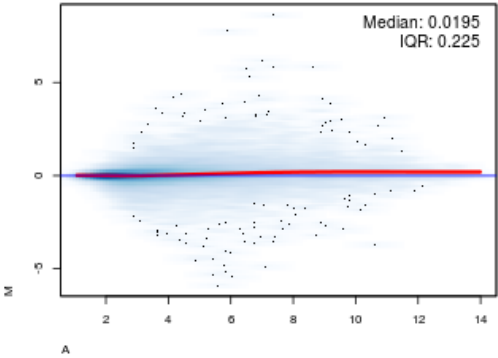

Color Key  
and Density Plot

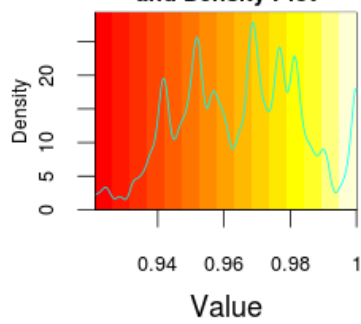

Array correlation plot  
after GCRMA normalization  
correlation method: pearson  
cluster method: ward

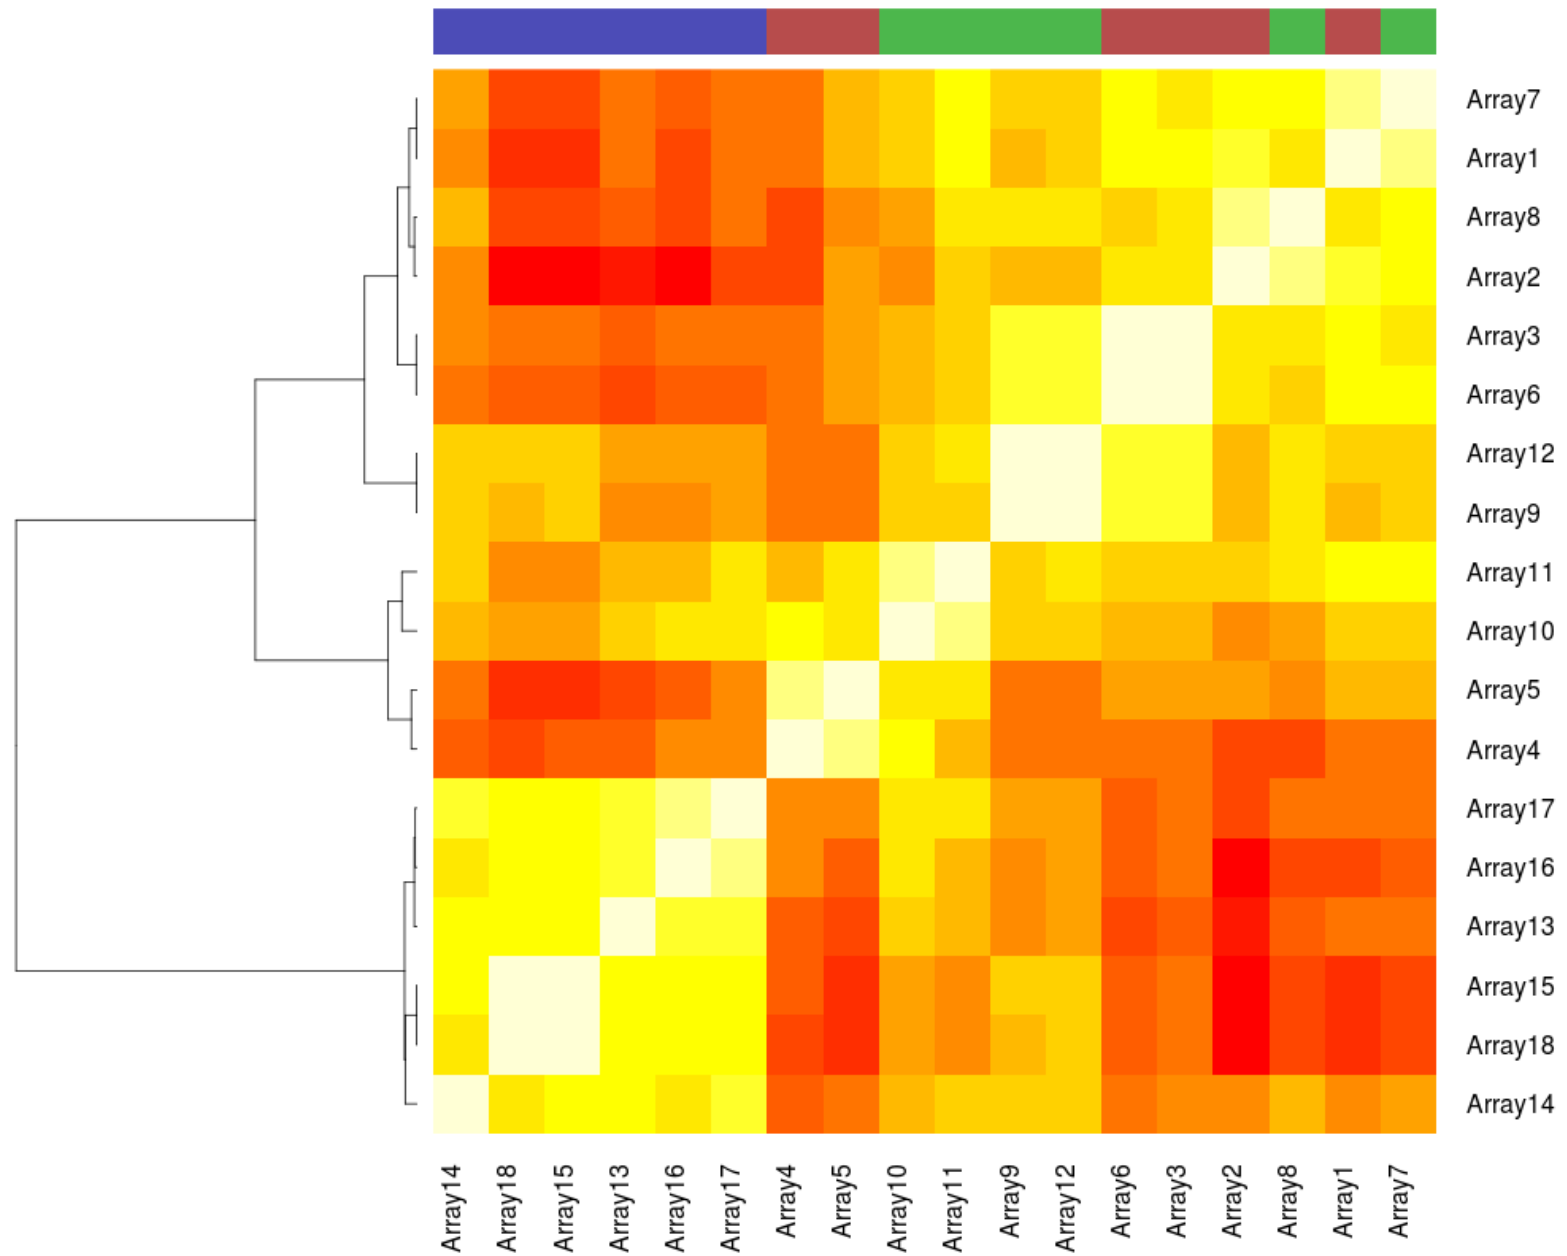

# PCA analysis after GCRMA normalization

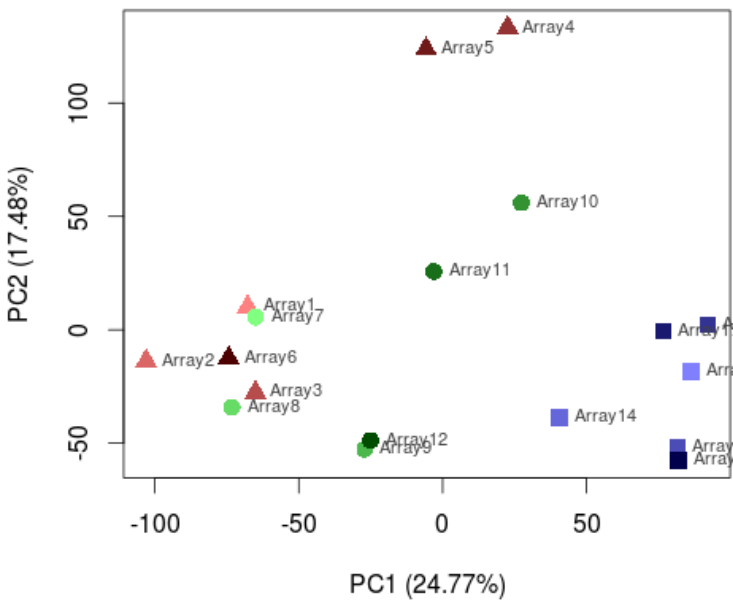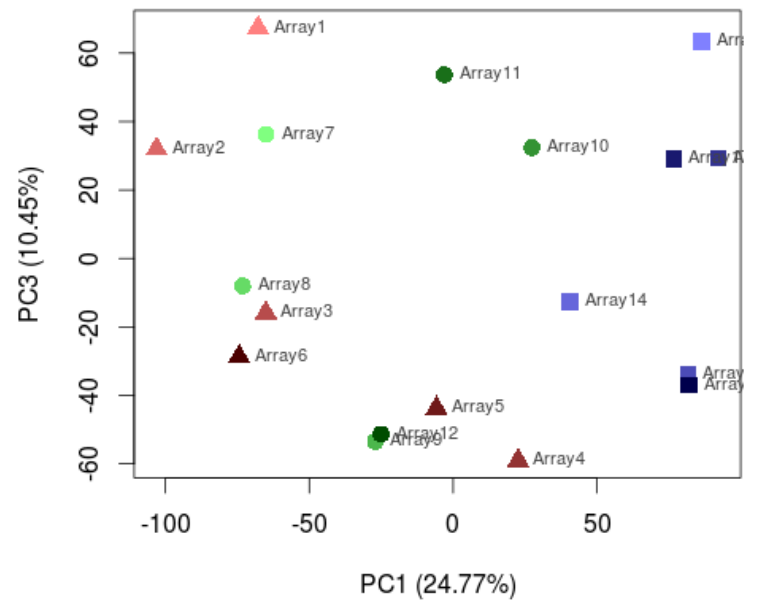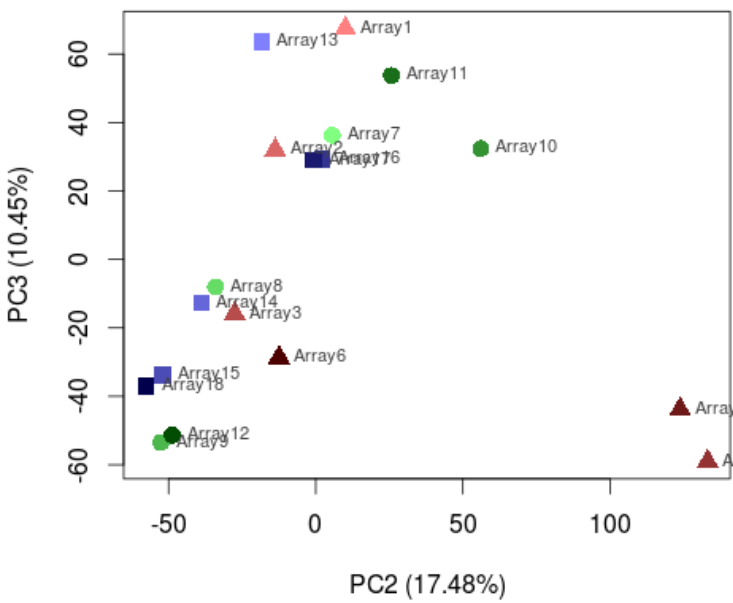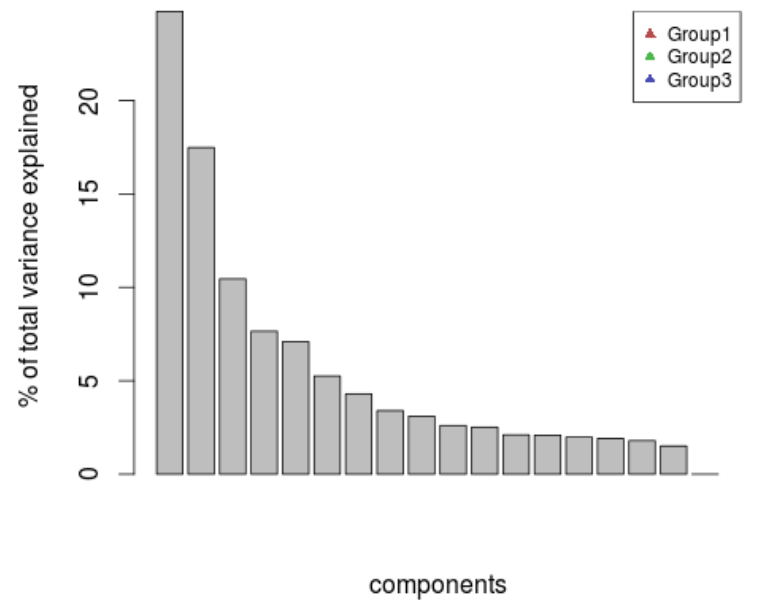



Cluster dendrogram of GCRMA normalized data

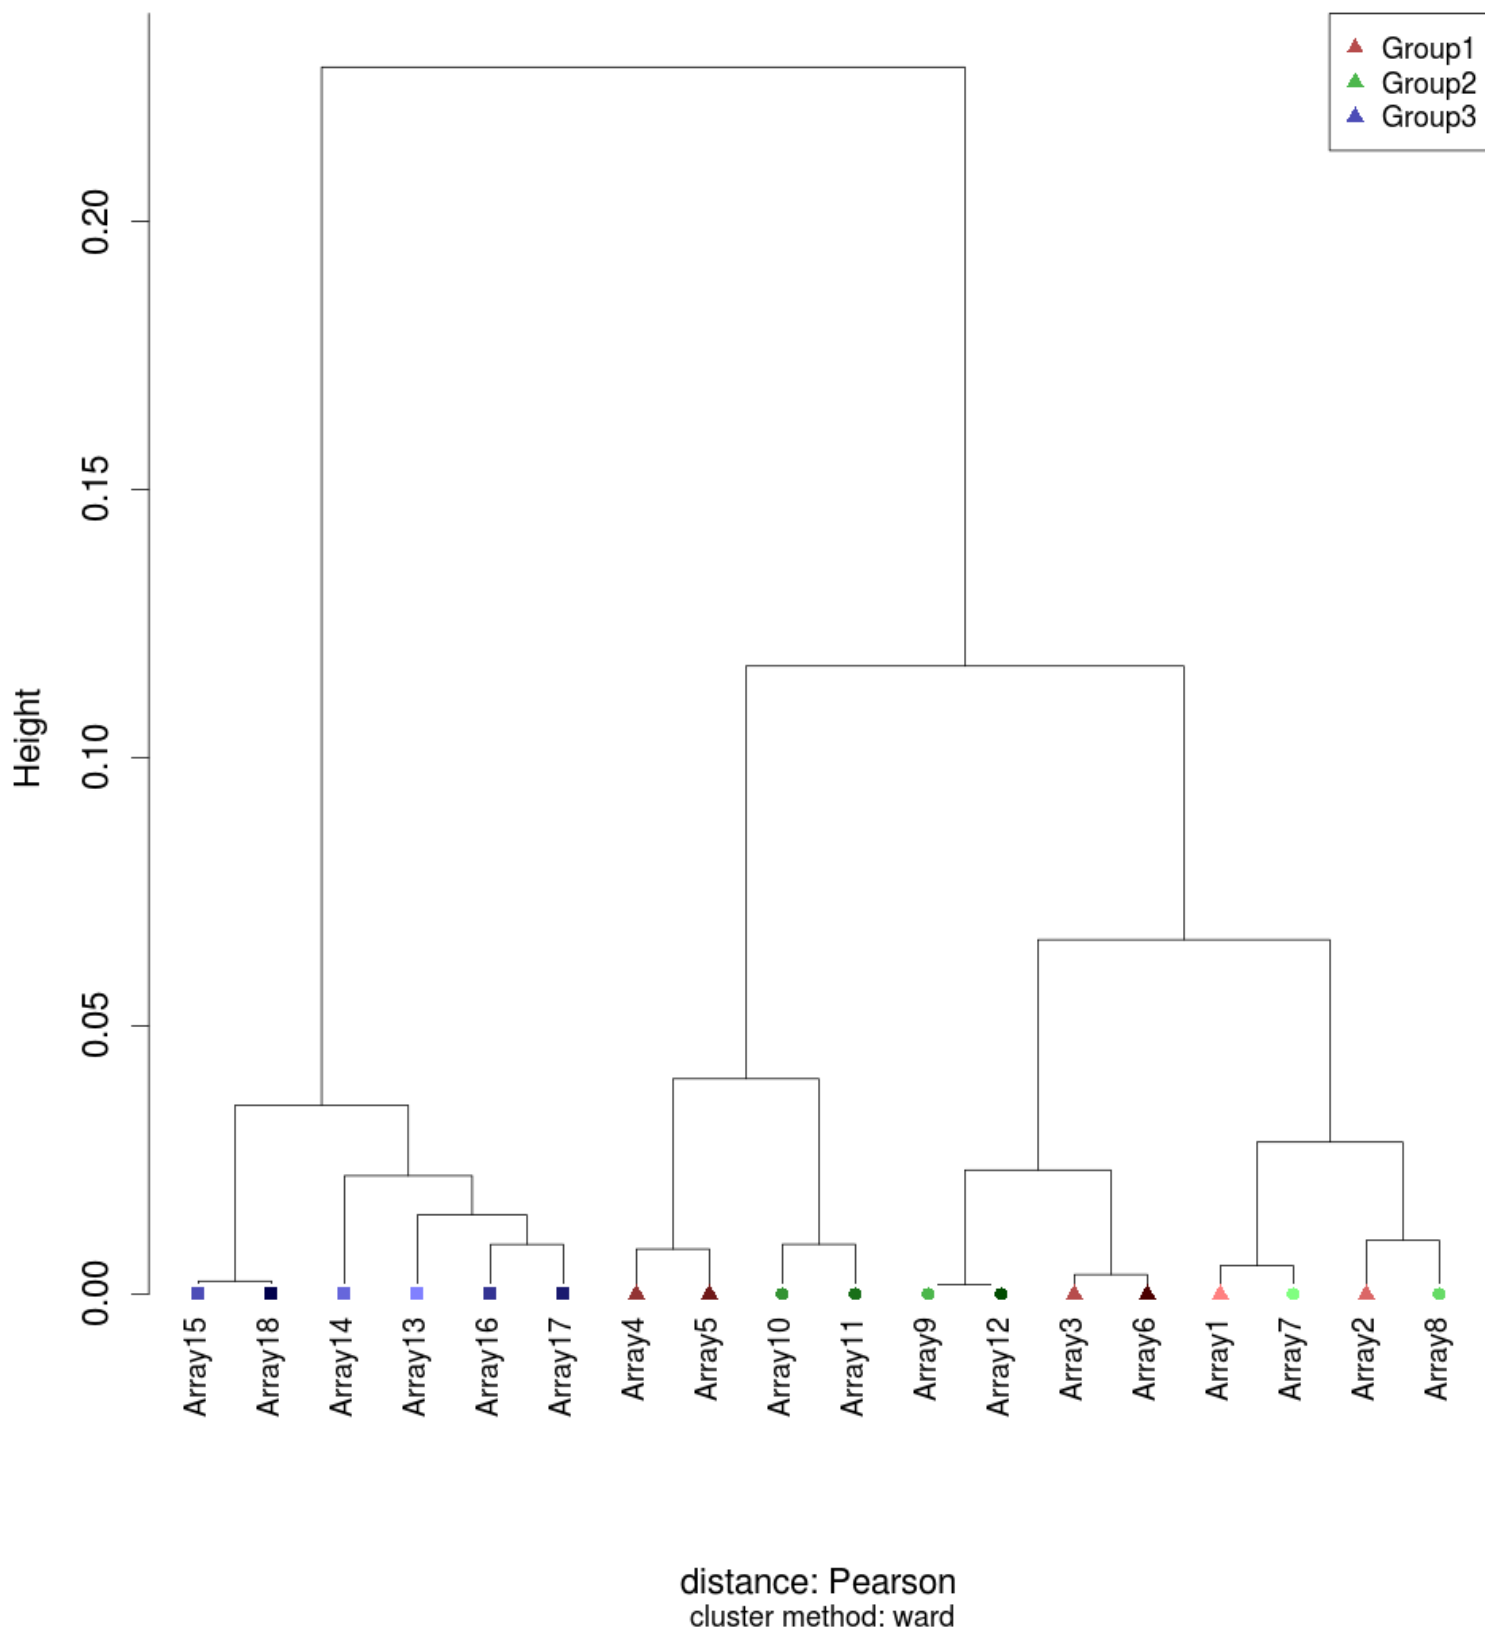

Supplement: Supplementary file 3 [file 2]
