# Supplementary material
Source: publisher figshare collection journal article supplement (https://tandf.figshare.com/articles/dataset/_/7886671)

Quality Control & Pre-processing Evaluation  
of  
E-GEOD-21037.raw.1\_0  
**REPORT**

## Array names and grouping

| ArrayDataFile | SourceName | FactorValue |
|---------------|------------|-------------|
| GSM525426.CEL | Array1     | Group1      |
| GSM525425.CEL | Array2     | Group1      |
| GSM525424.CEL | Array3     | Group1      |
| GSM525423.CEL | Array4     | Group2      |
| GSM525422.CEL | Array5     | Group2      |
| GSM525421.CEL | Array6     | Group2      |
| GSM525420.CEL | Array7     | Group3      |
| GSM525419.CEL | Array8     | Group3      |
| GSM525418.CEL | Array9     | Group3      |
| GSM525417.CEL | Array10    | Group4      |
| GSM525416.CEL | Array11    | Group4      |
| GSM525415.CEL | Array12    | Group4      |
| GSM525414.CEL | Array13    | Group5      |
| GSM525413.CEL | Array14    | Group5      |
| GSM525412.CEL | Array15    | Group5      |
| GSM525411.CEL | Array16    | Group6      |
| GSM525410.CEL | Array17    | Group6      |
| GSM525409.CEL | Array18    | Group6      |
| GSM525408.CEL | Array19    | Group7      |
| GSM525407.CEL | Array20    | Group7      |
| GSM525406.CEL | Array21    | Group7      |

# affx control profiles

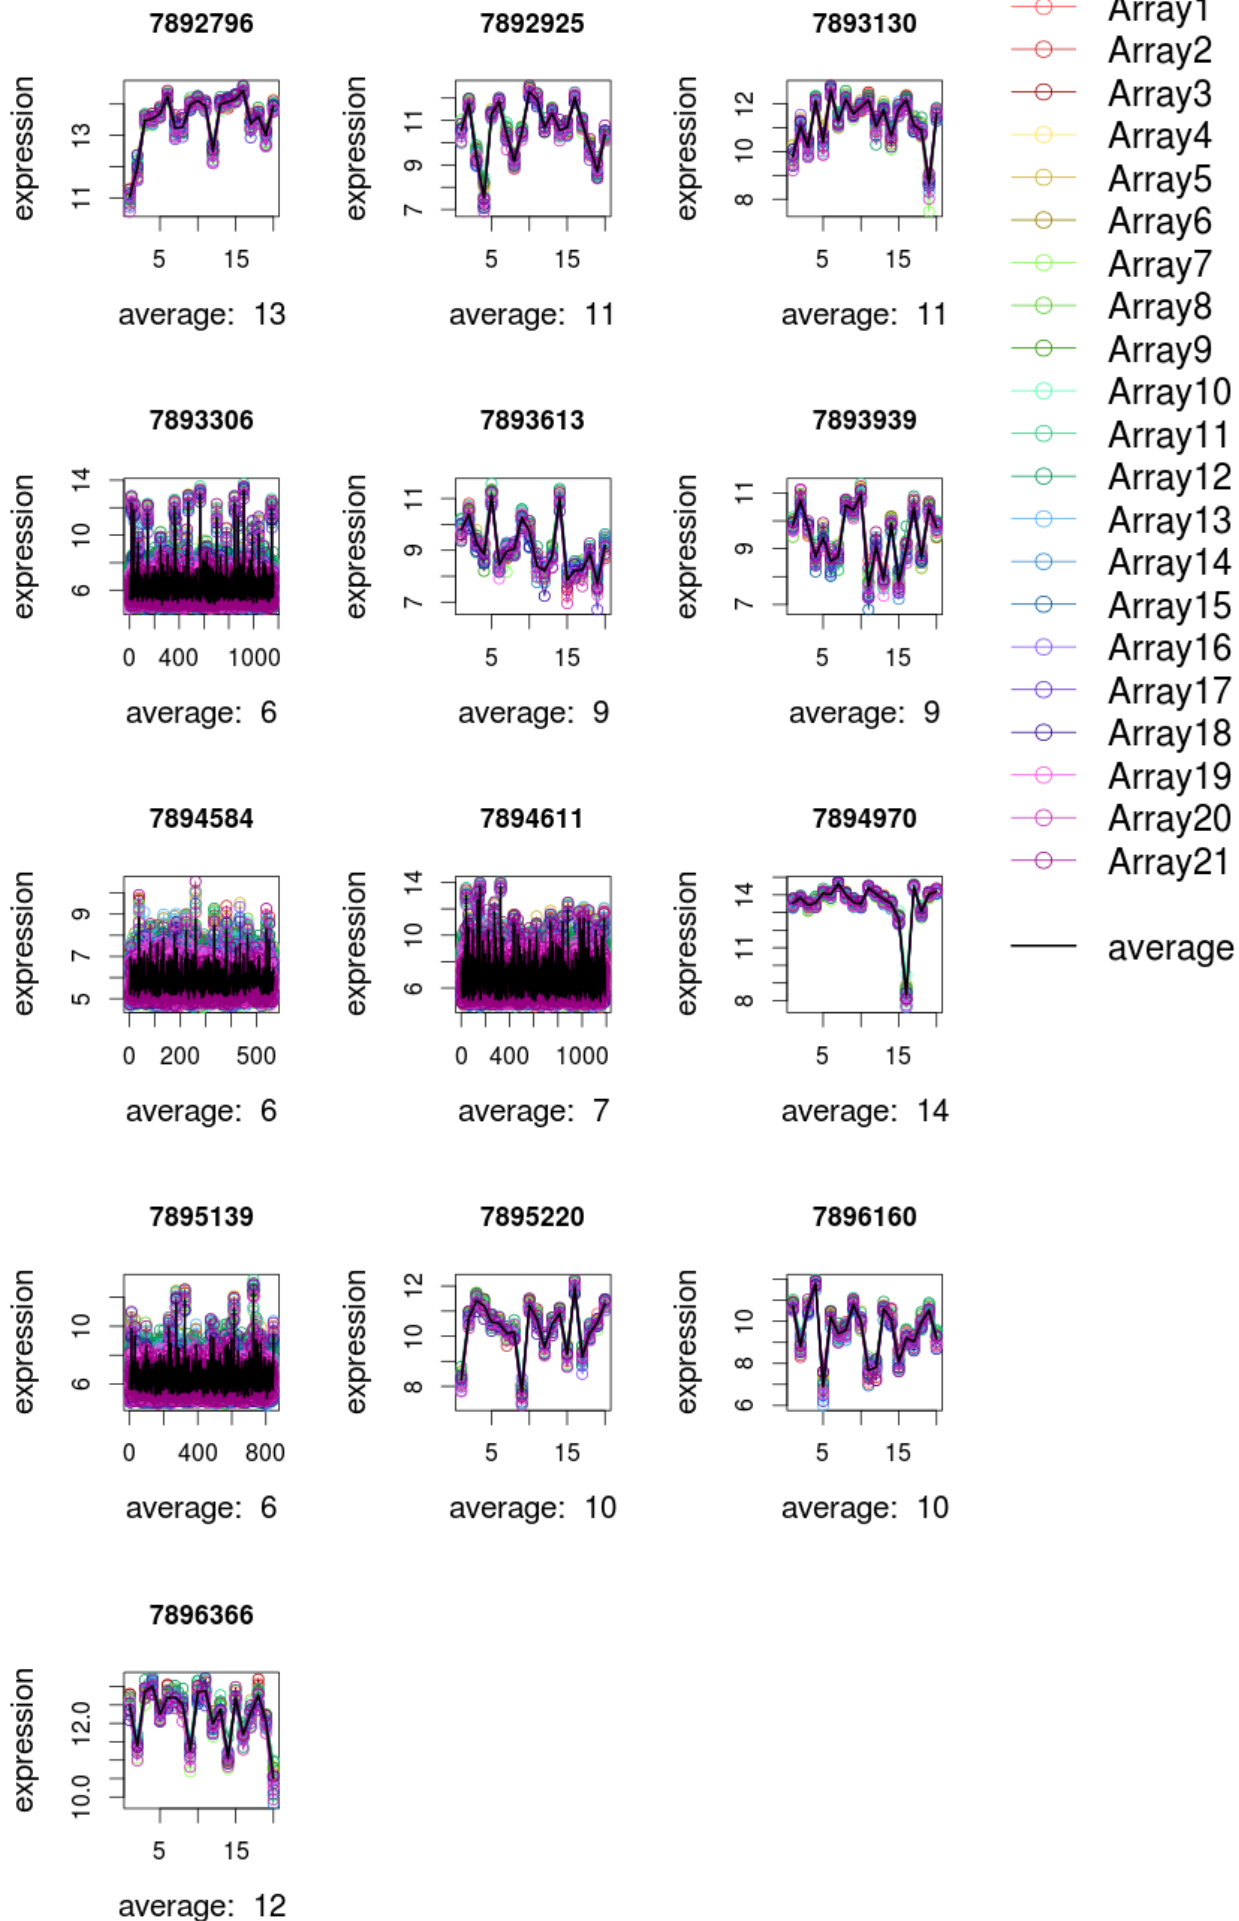

# affx controls

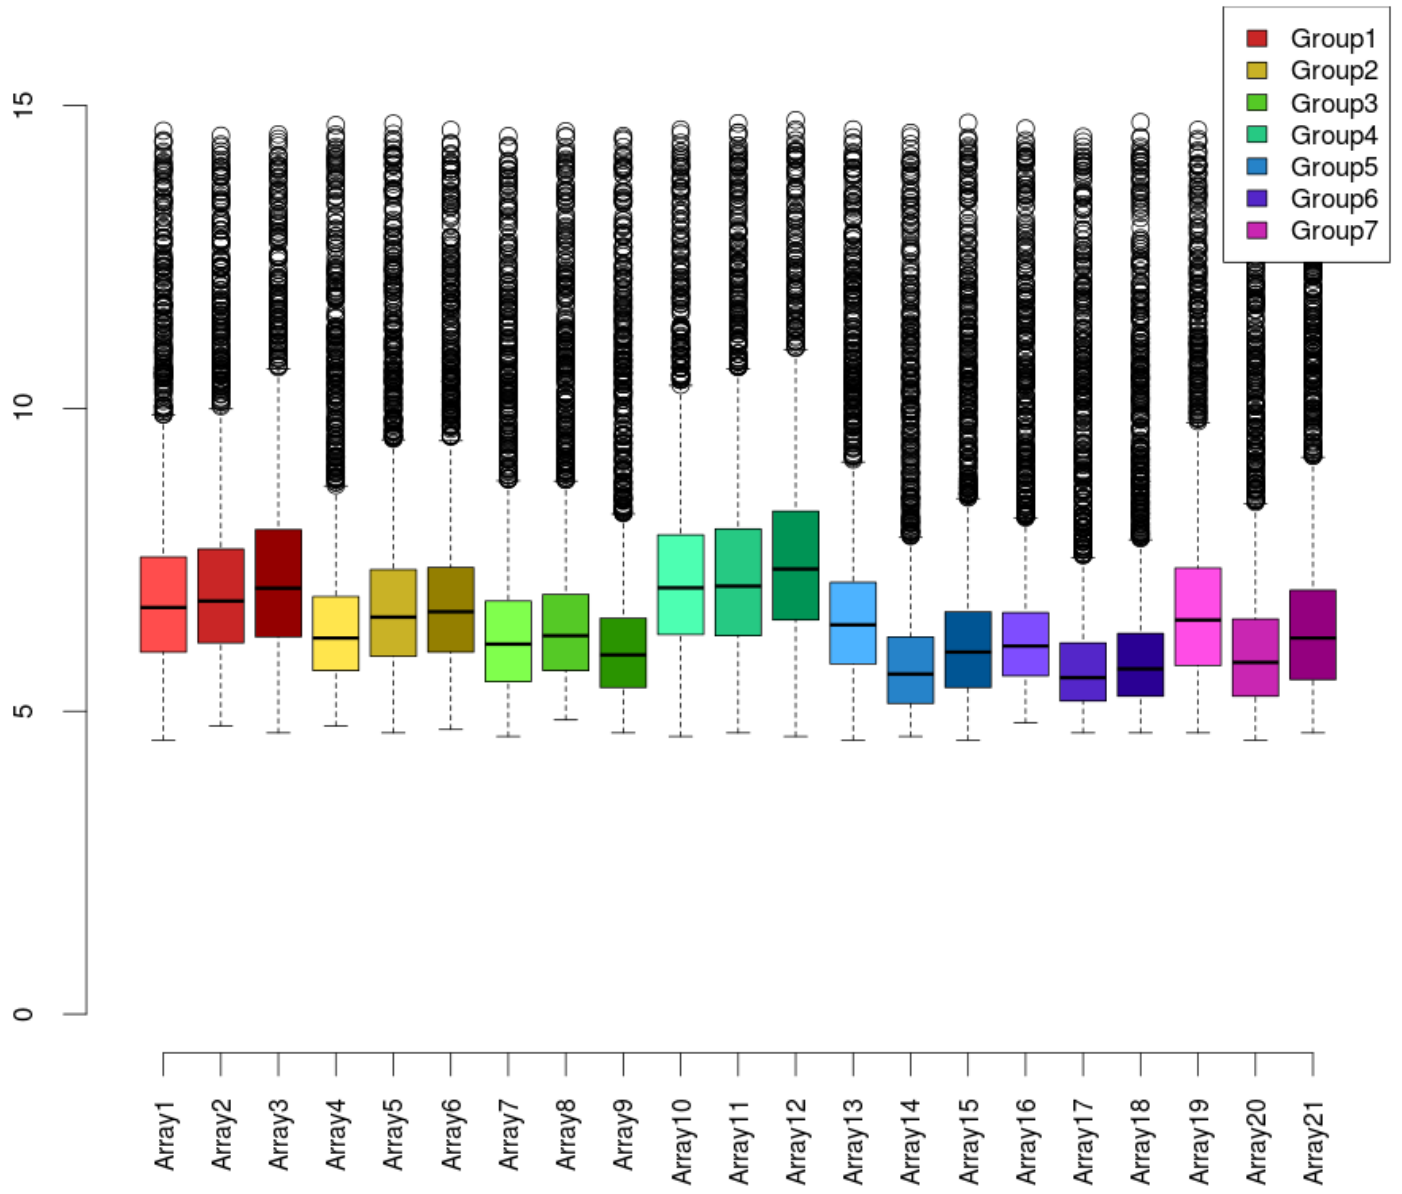

exon controls

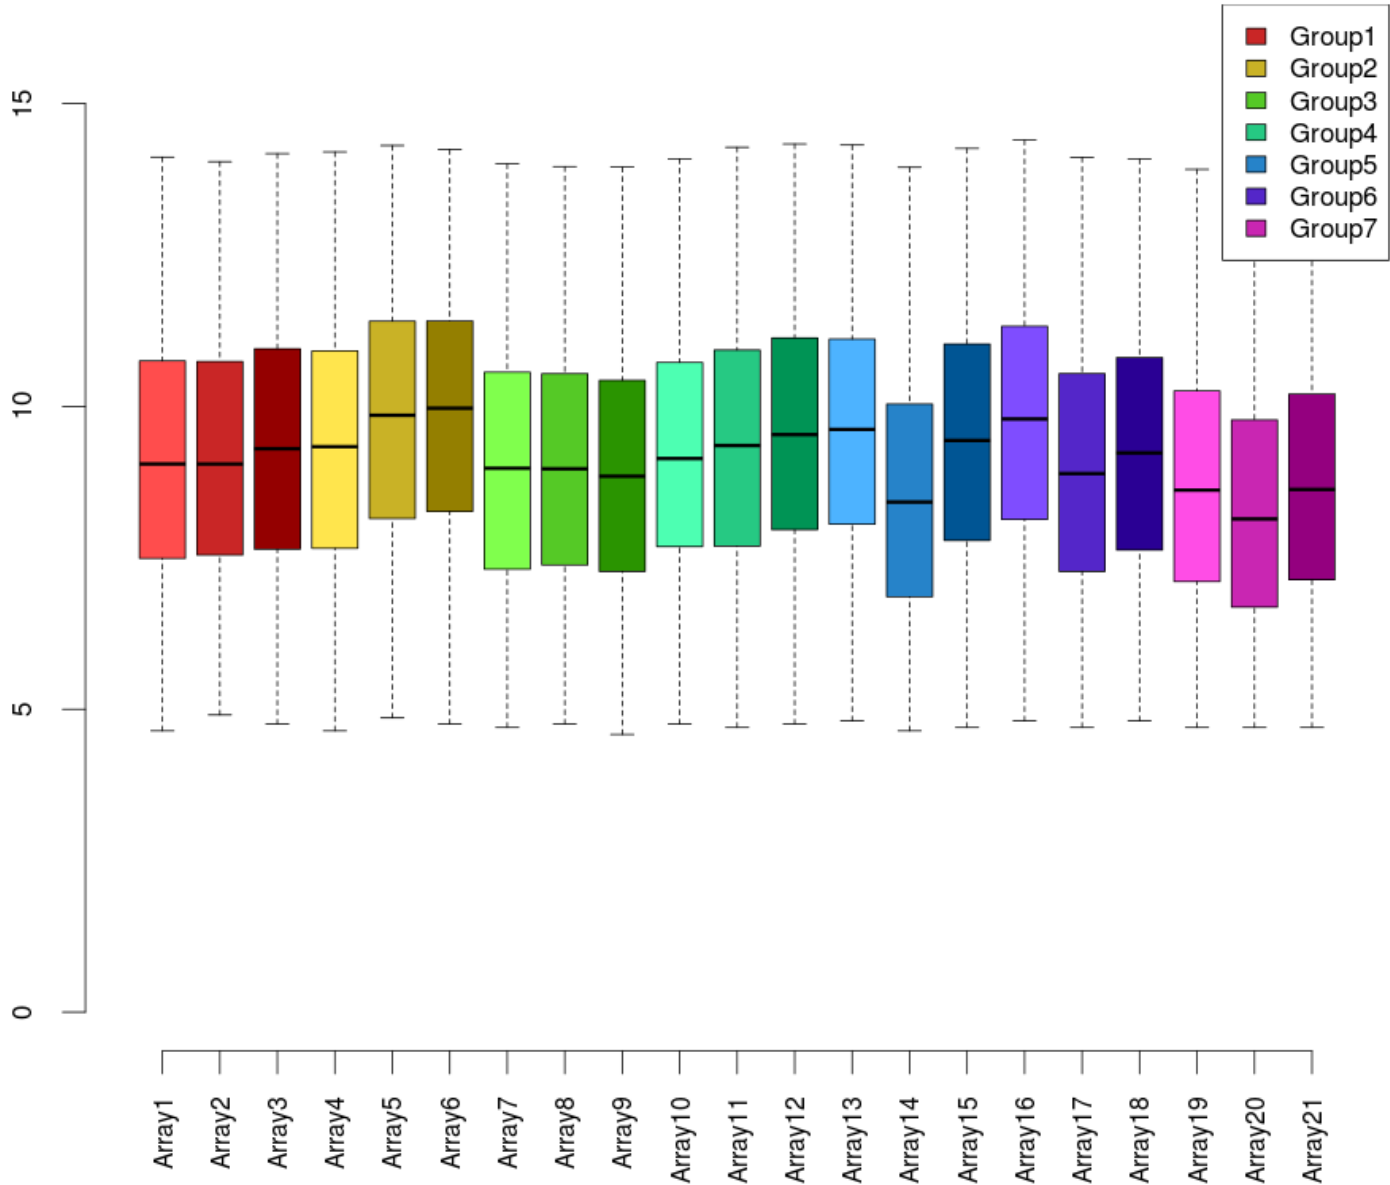

intron controls

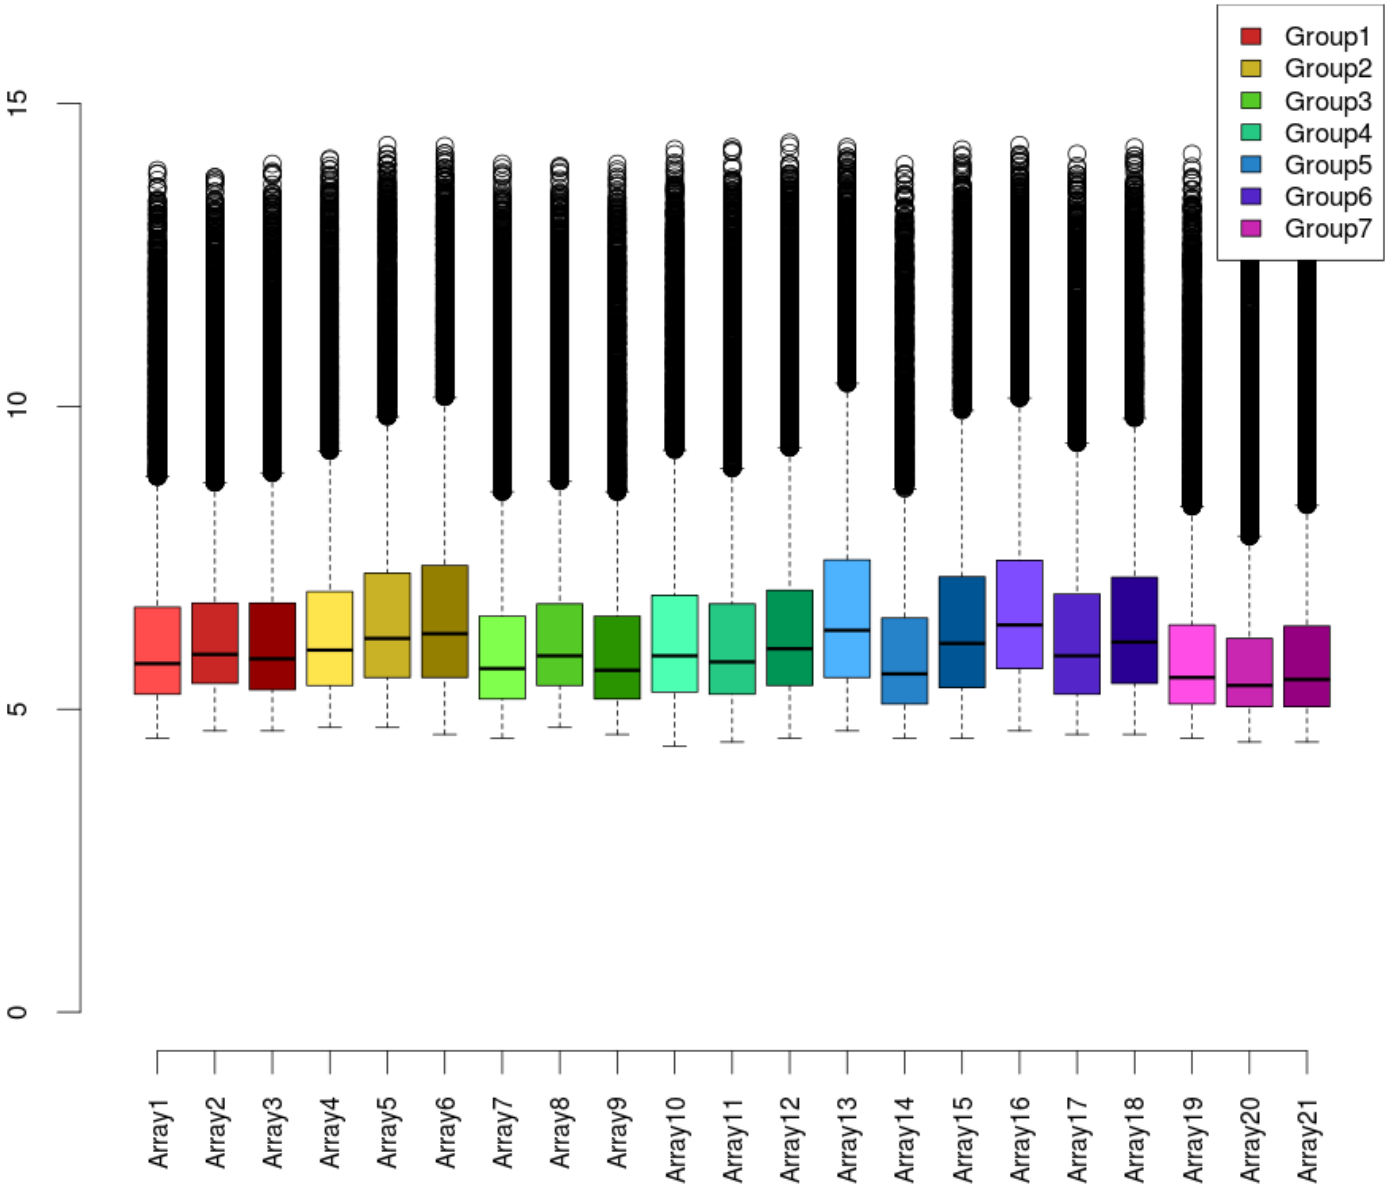

# Boxplot of raw intensities

Distributions should be comparable between arrays

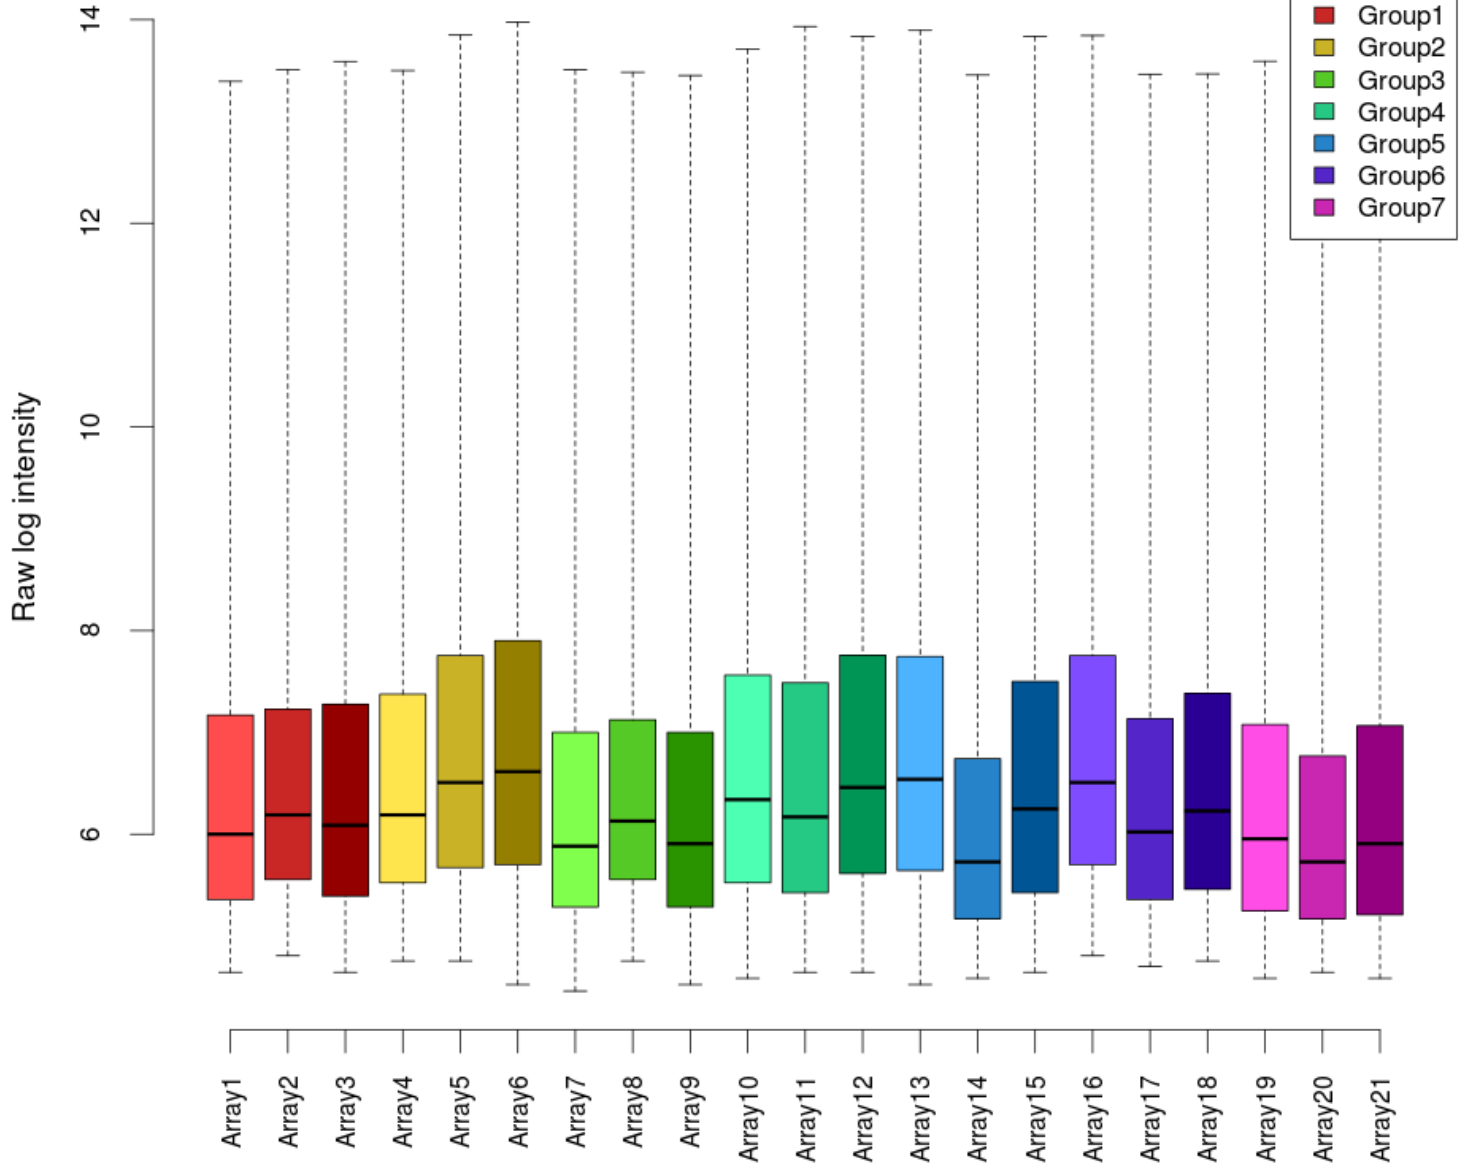

# Density histogram of raw intensities

Curves should be comparable between arrays

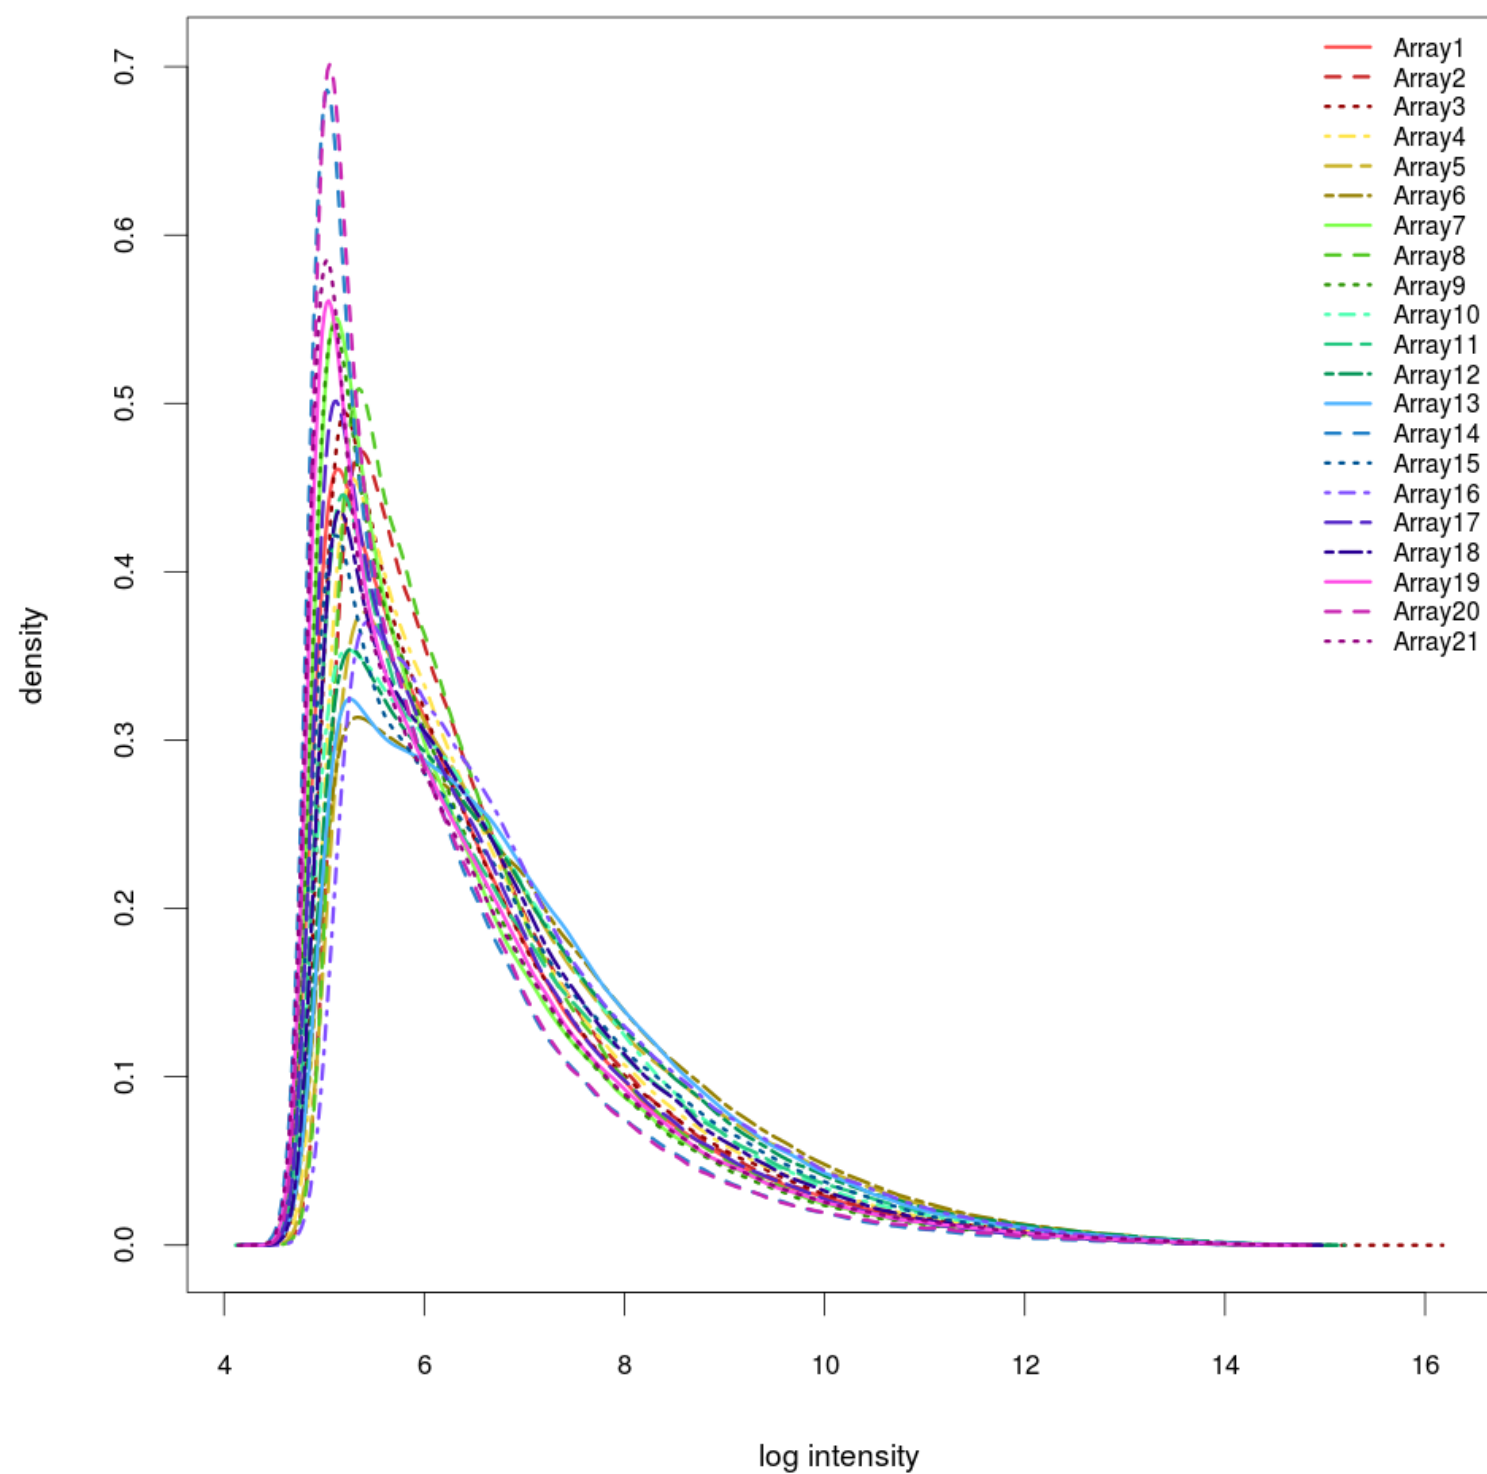



# MA plots of raw data 1 / 2

Array1 vs pseudo-median reference chip

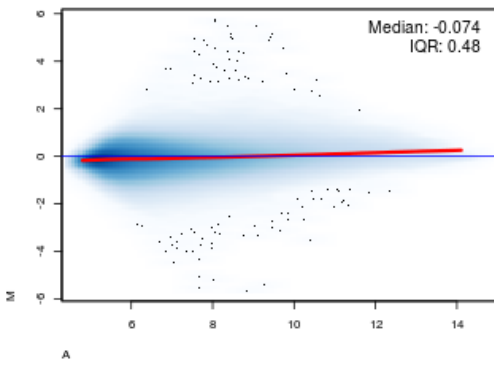

Array2 vs pseudo-median reference chip

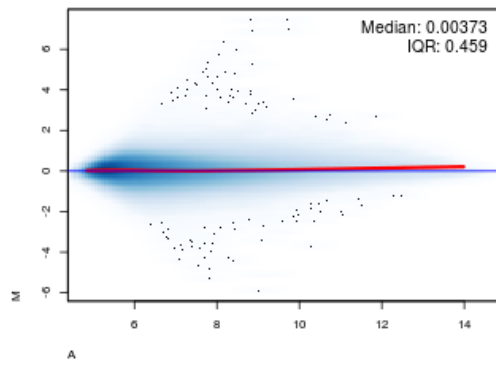

Array3 vs pseudo-median reference chip

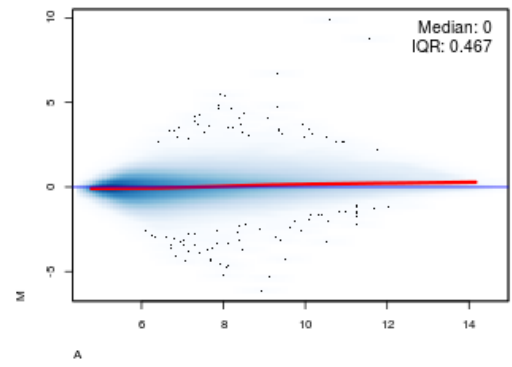

Array4 vs pseudo-median reference chip

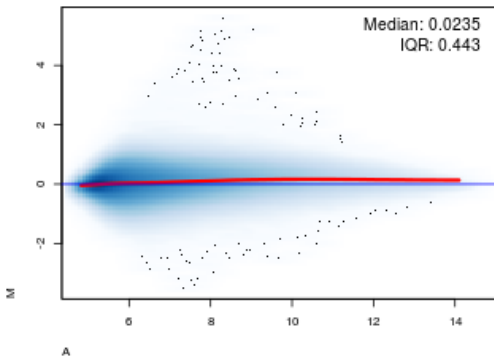

Array5 vs pseudo-median reference chip

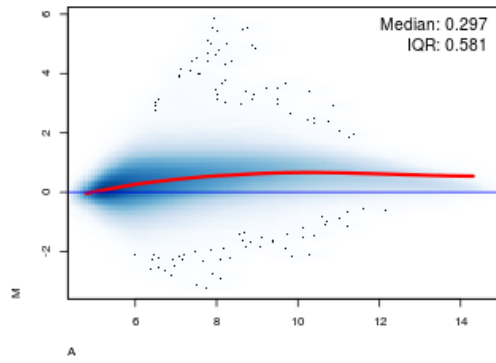

Array6 vs pseudo-median reference chip

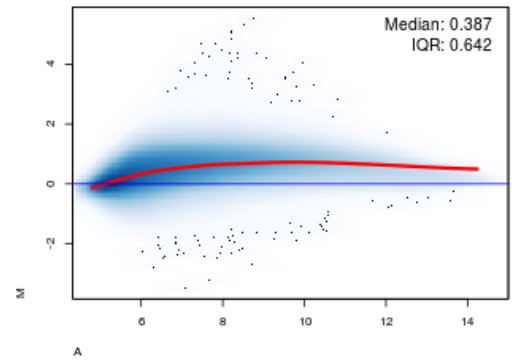

Array7 vs pseudo-median reference chip

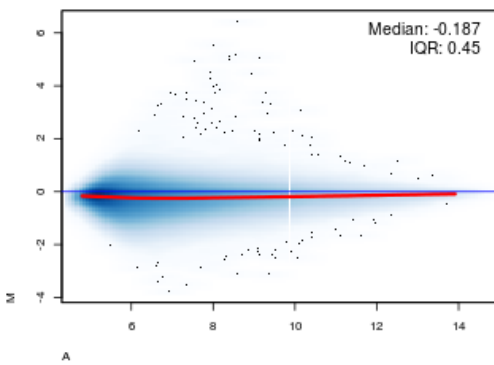

Array8 vs pseudo-median reference chip

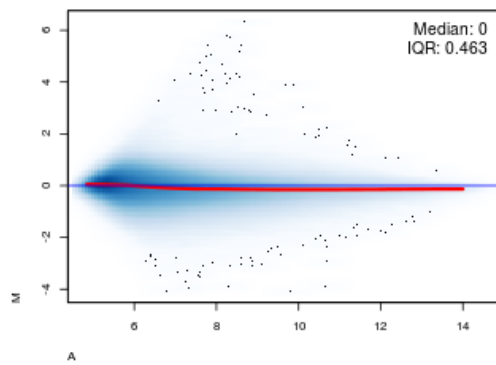

Array9 vs pseudo-median reference chip

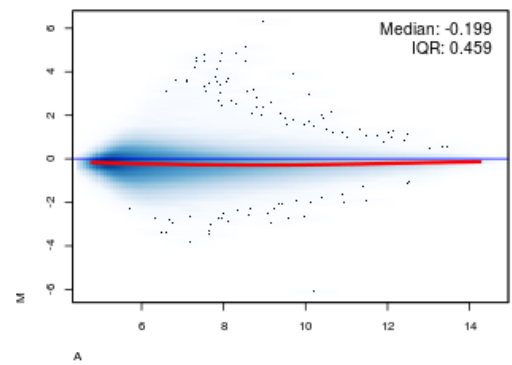

Array10 vs pseudo-median reference chip

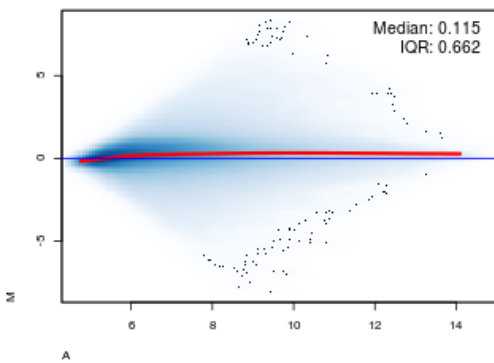

Array11 vs pseudo-median reference chip

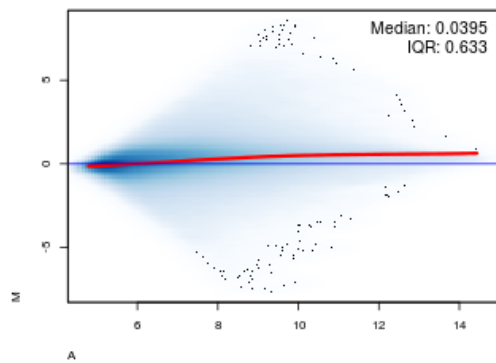

Array12 vs pseudo-median reference chip

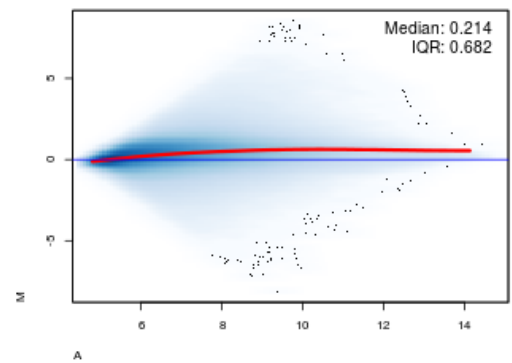

Array13 vs pseudo-median reference chip

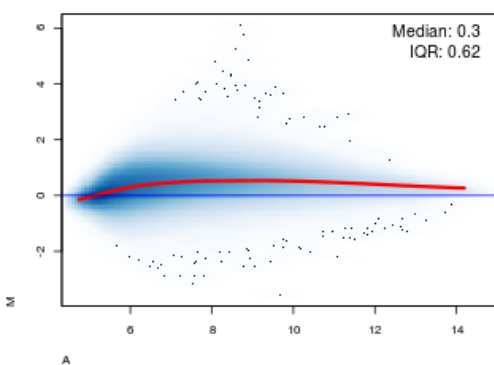

Array14 vs pseudo-median reference chip

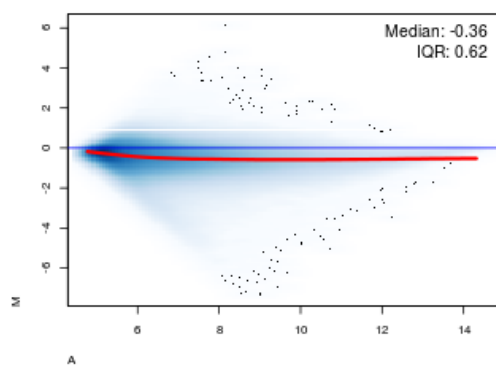

Array15 vs pseudo-median reference chip

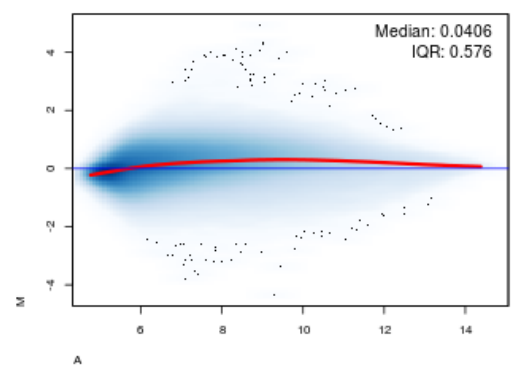

## MA plots of raw data 2 / 2

Array16 vs pseudo-median reference chip

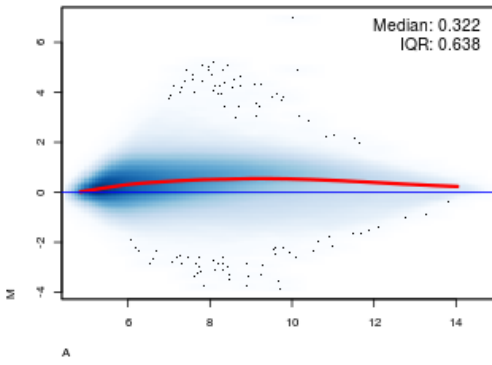

Array17 vs pseudo-median reference chip

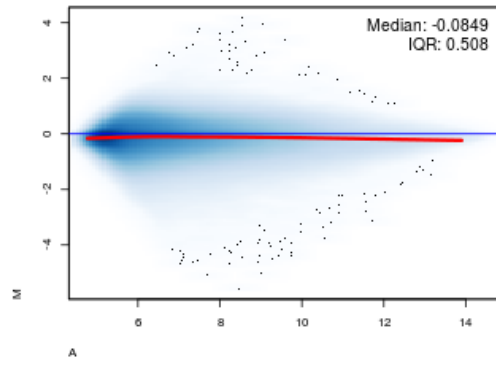

Array18 vs pseudo-median reference chip

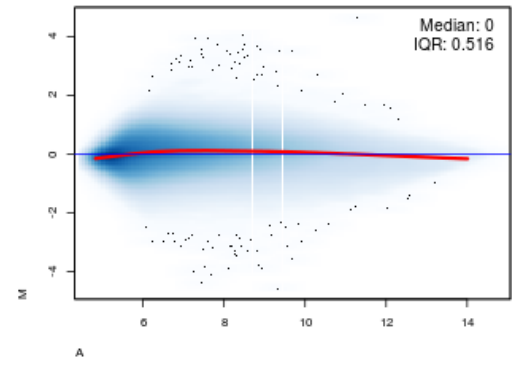

Array19 vs pseudo-median reference chip

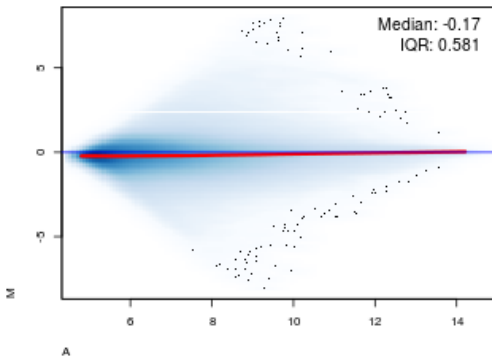

Array20 vs pseudo-median reference chip

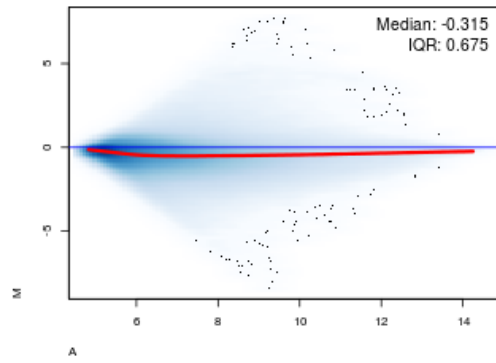

Array21 vs pseudo-median reference chip

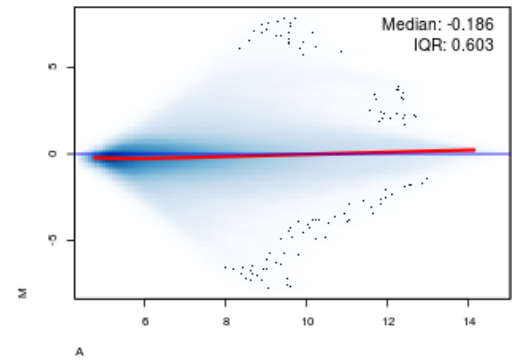



## 2D virtual PLM image for model characteristic: resid 1 / 2

**Array1**

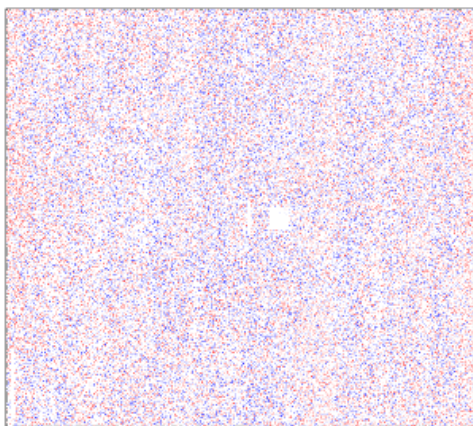

**Array2**

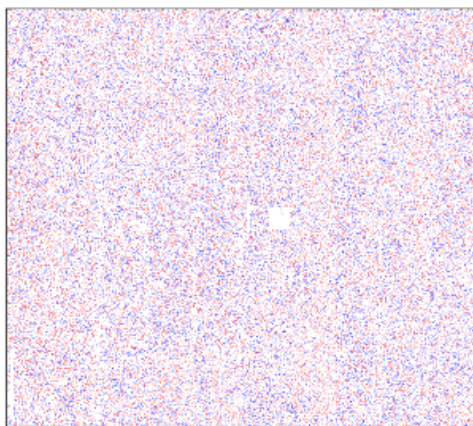

**Array3**

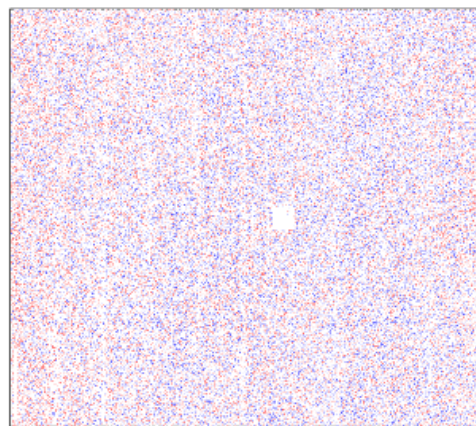

**Array4**

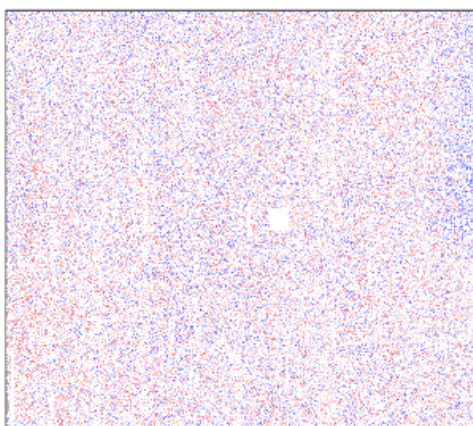

**Array5**

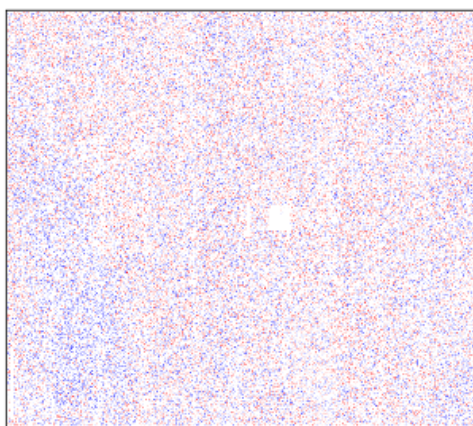

**Array6**

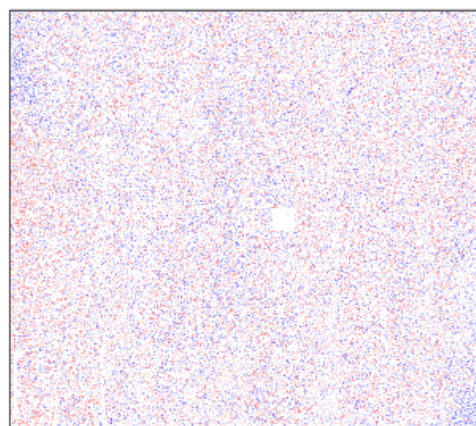

**Array7**

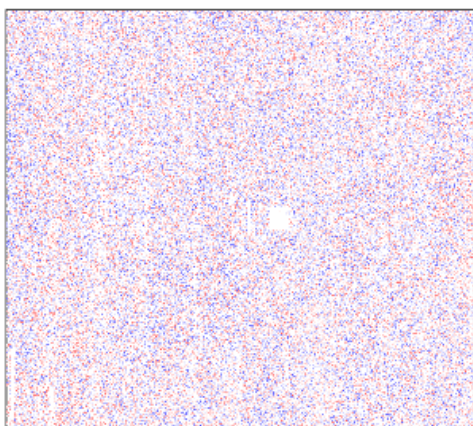

**Array8**

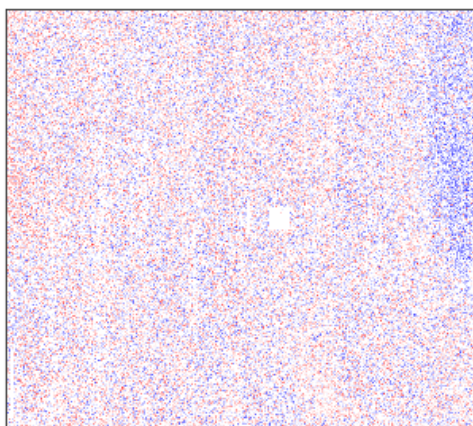

**Array9**

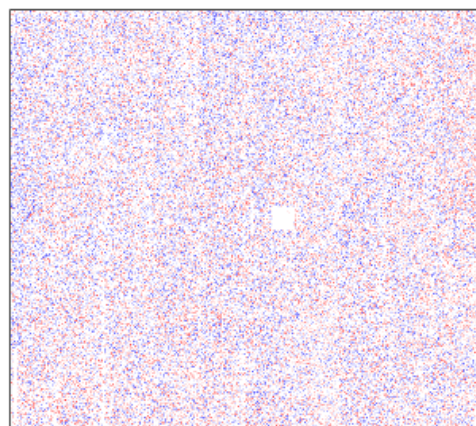

**Array10**

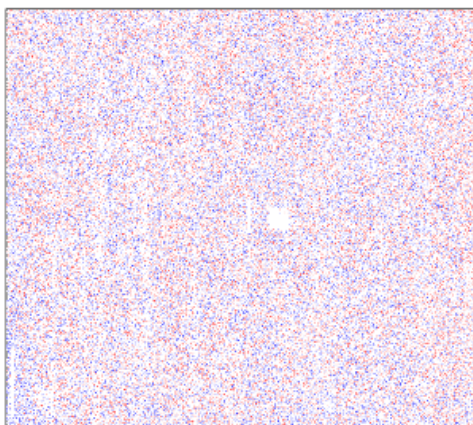

**Array11**

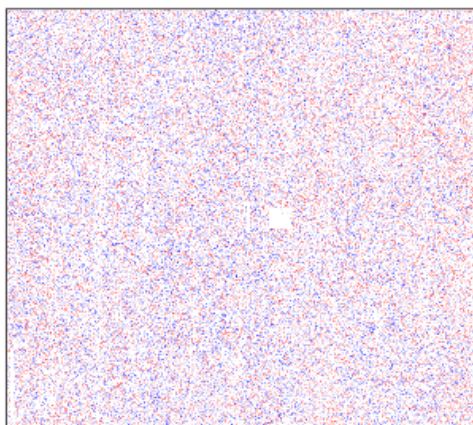

**Array12**

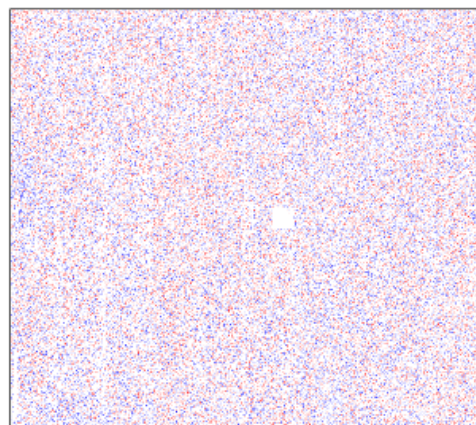



## 2D virtual PLM image for model characteristic: resids 2 / 2

**Array13**

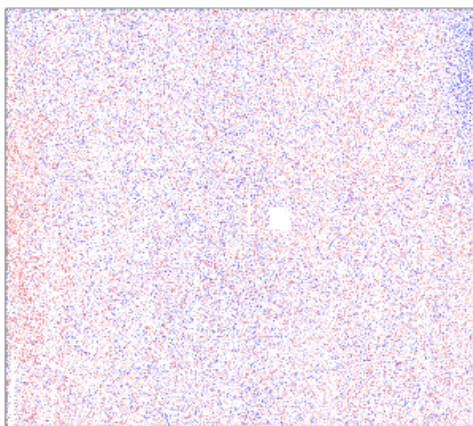

**Array14**

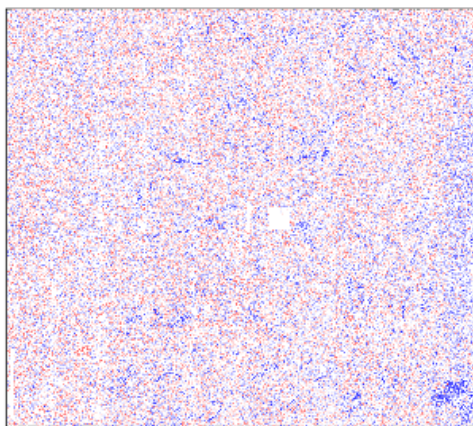

**Array15**

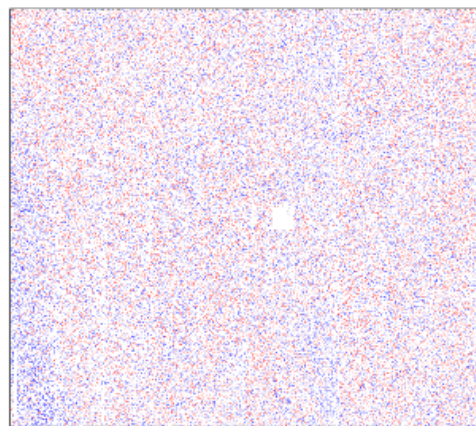

**Array16**

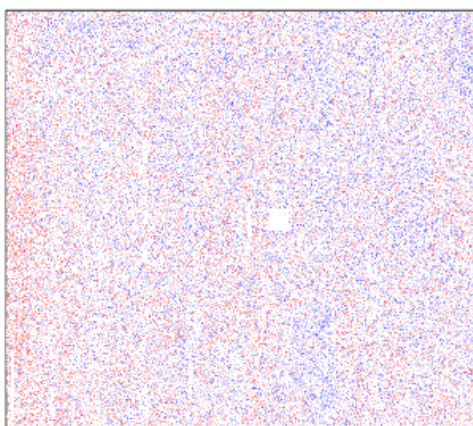

**Array17**

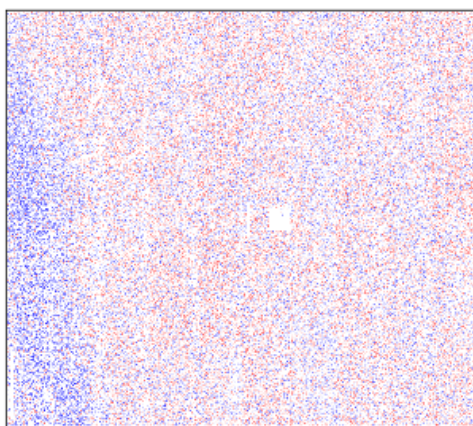

**Array18**

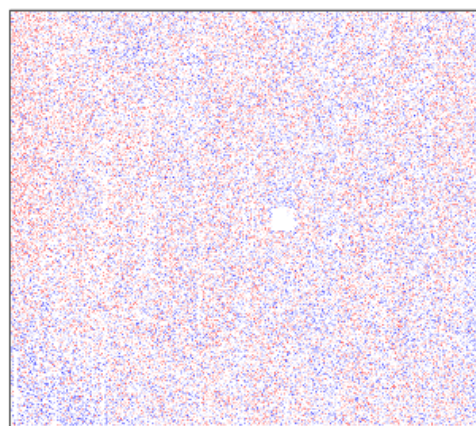

**Array19**

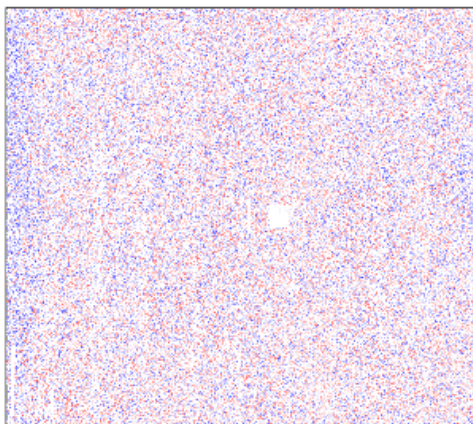

**Array20**

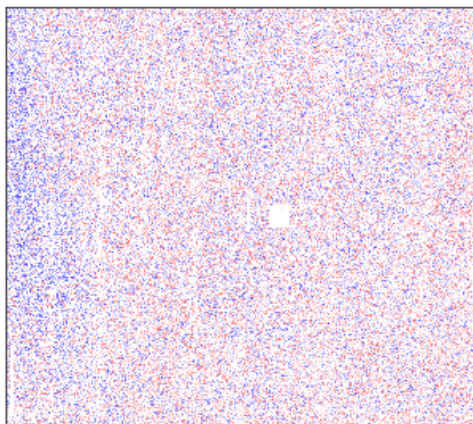

**Array21**

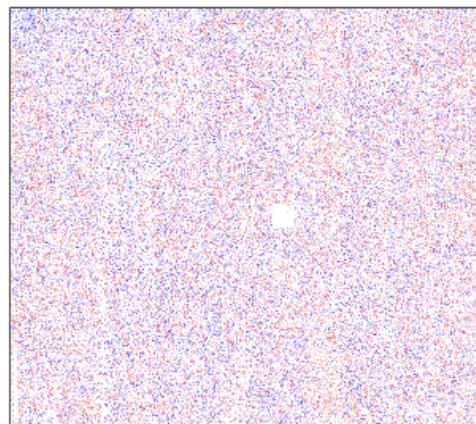



# Normalized Unscaled Standard Errors (NUSE)

NUSE median value should be < 1.1

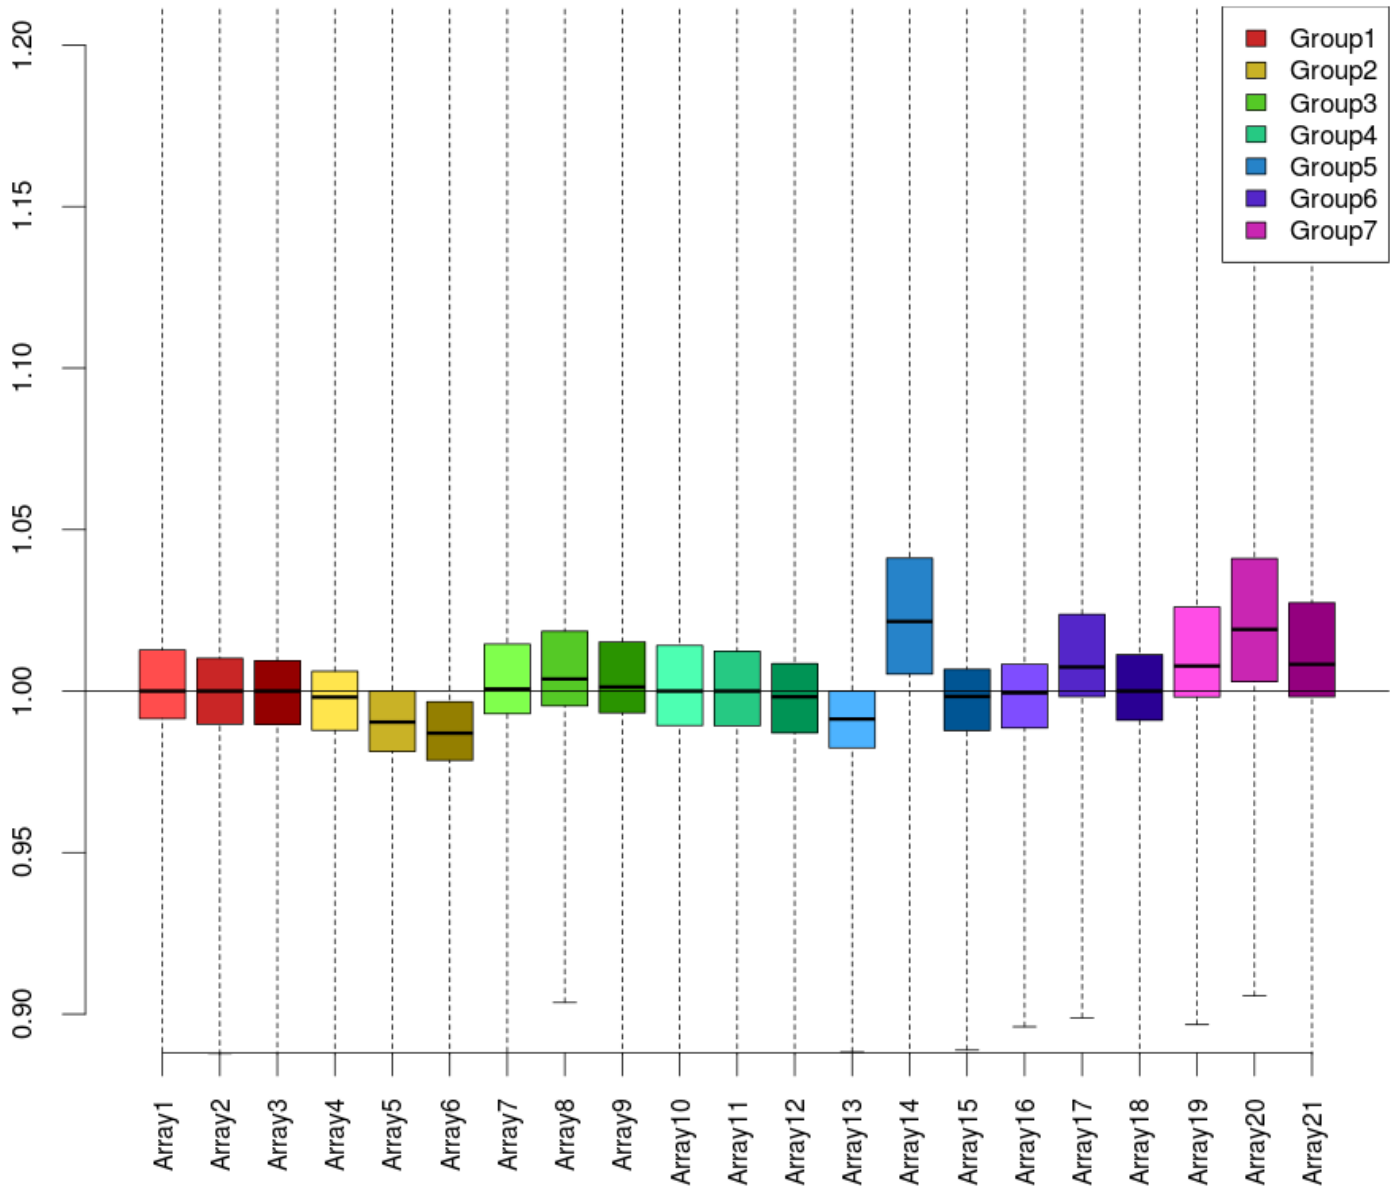

# Relative Log Expression (RLE)

RLE distributions should be centered around 0

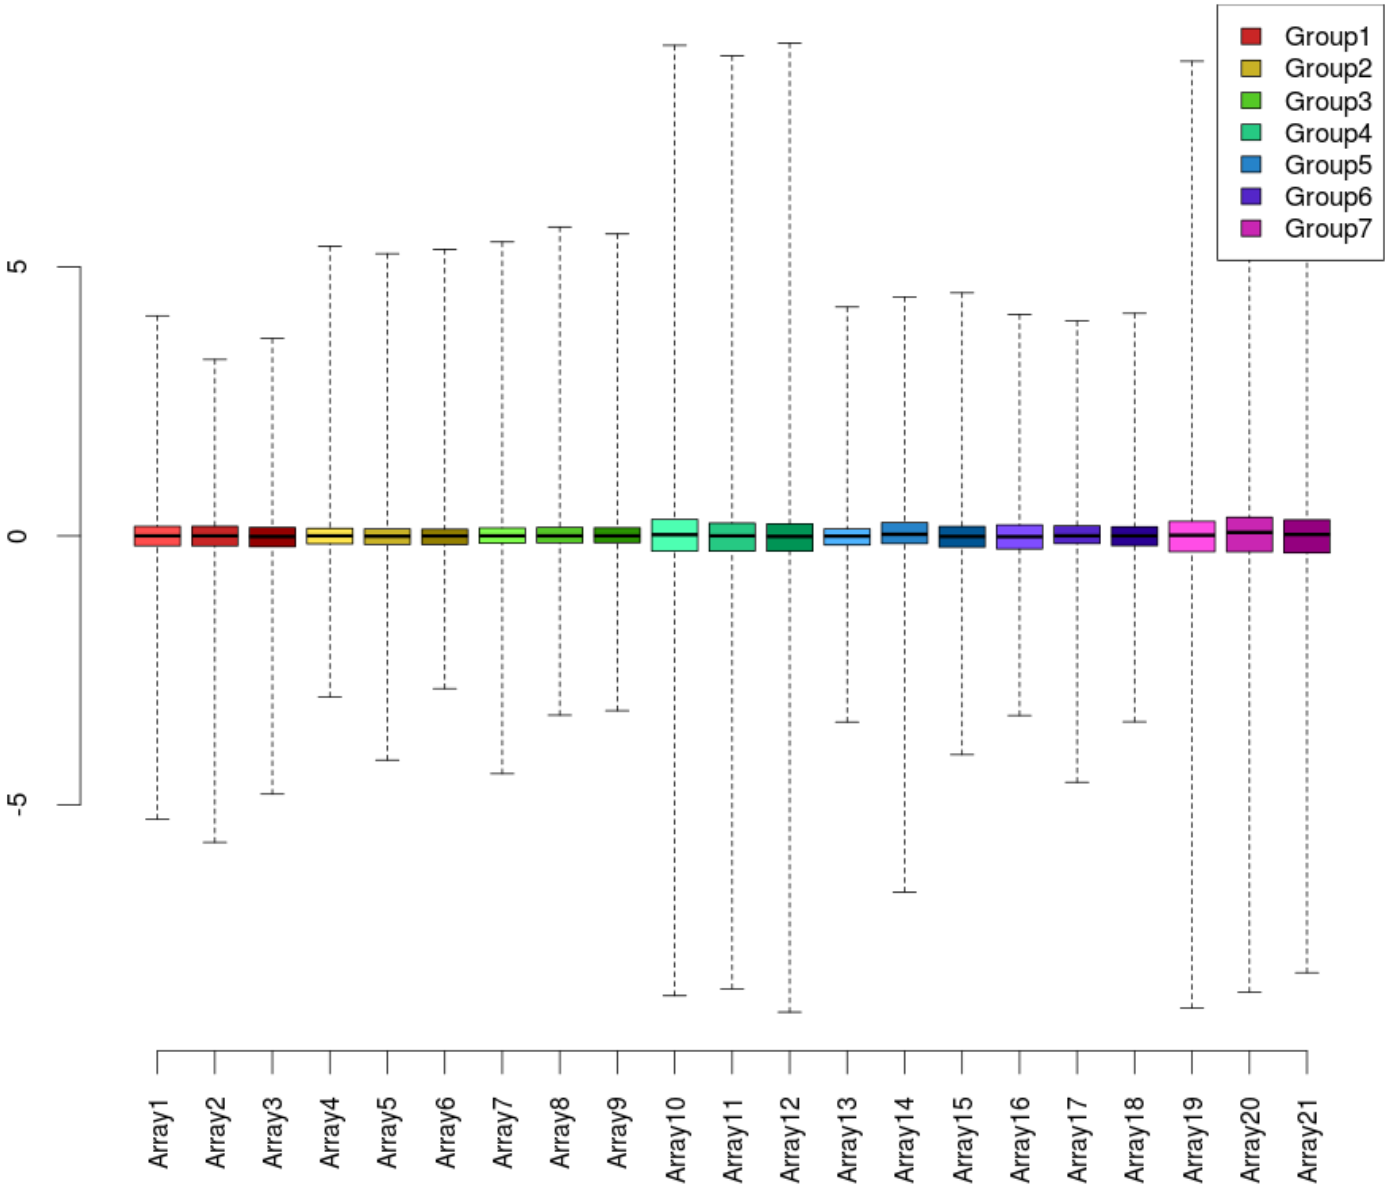

Color Key  
and Density Plot

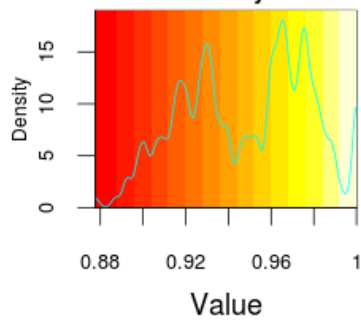

Raw data correlation plot  
correlation method: pearson  
cluster method: ward

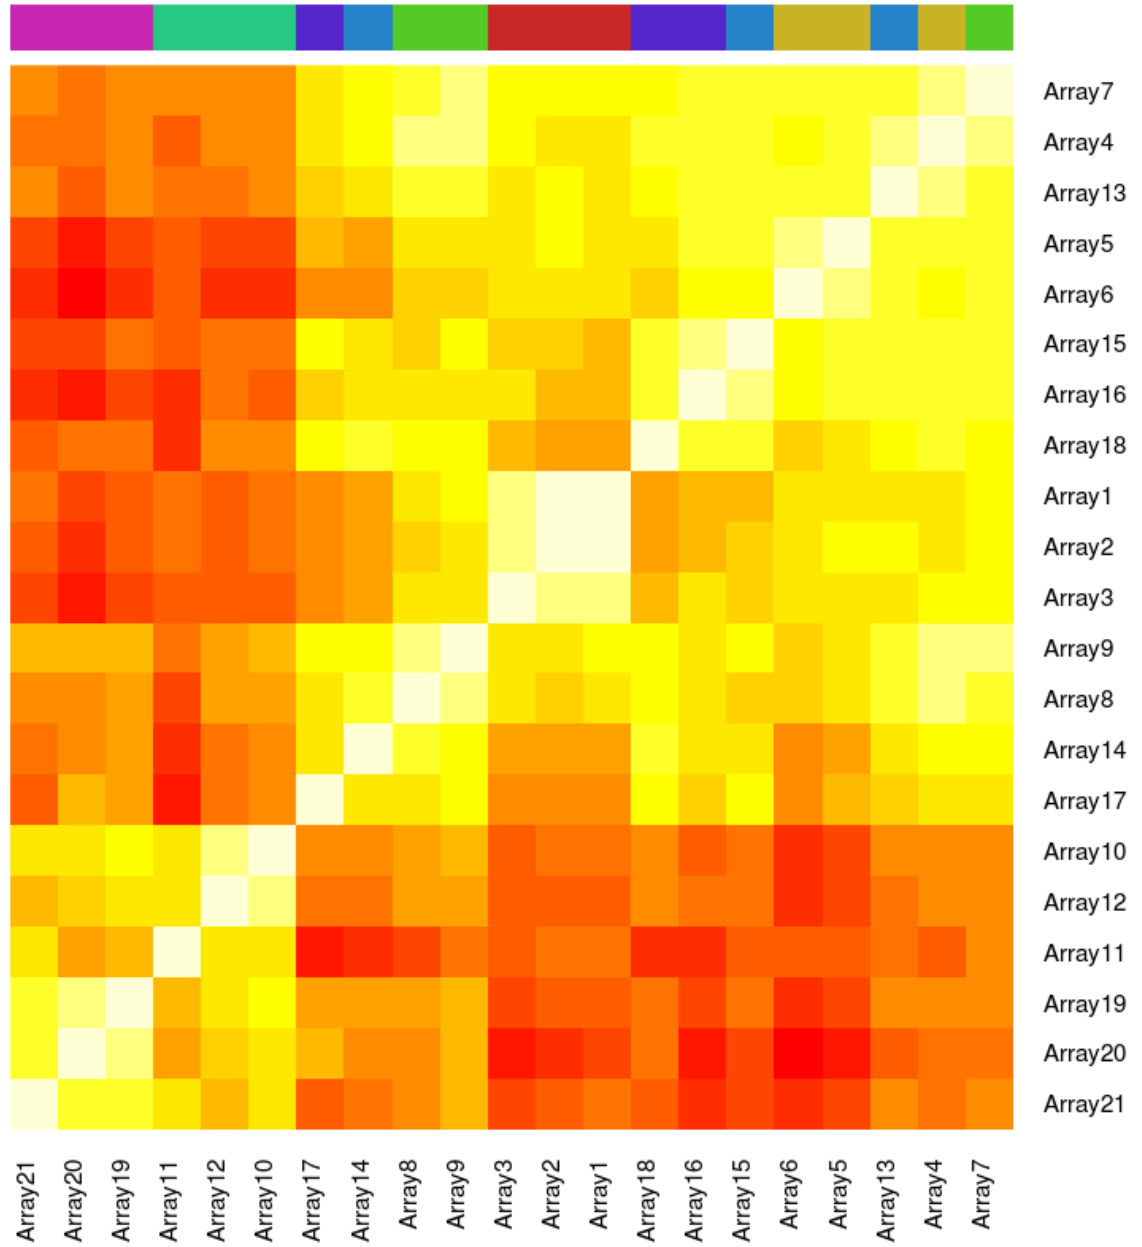

# PCA analysis of Raw data

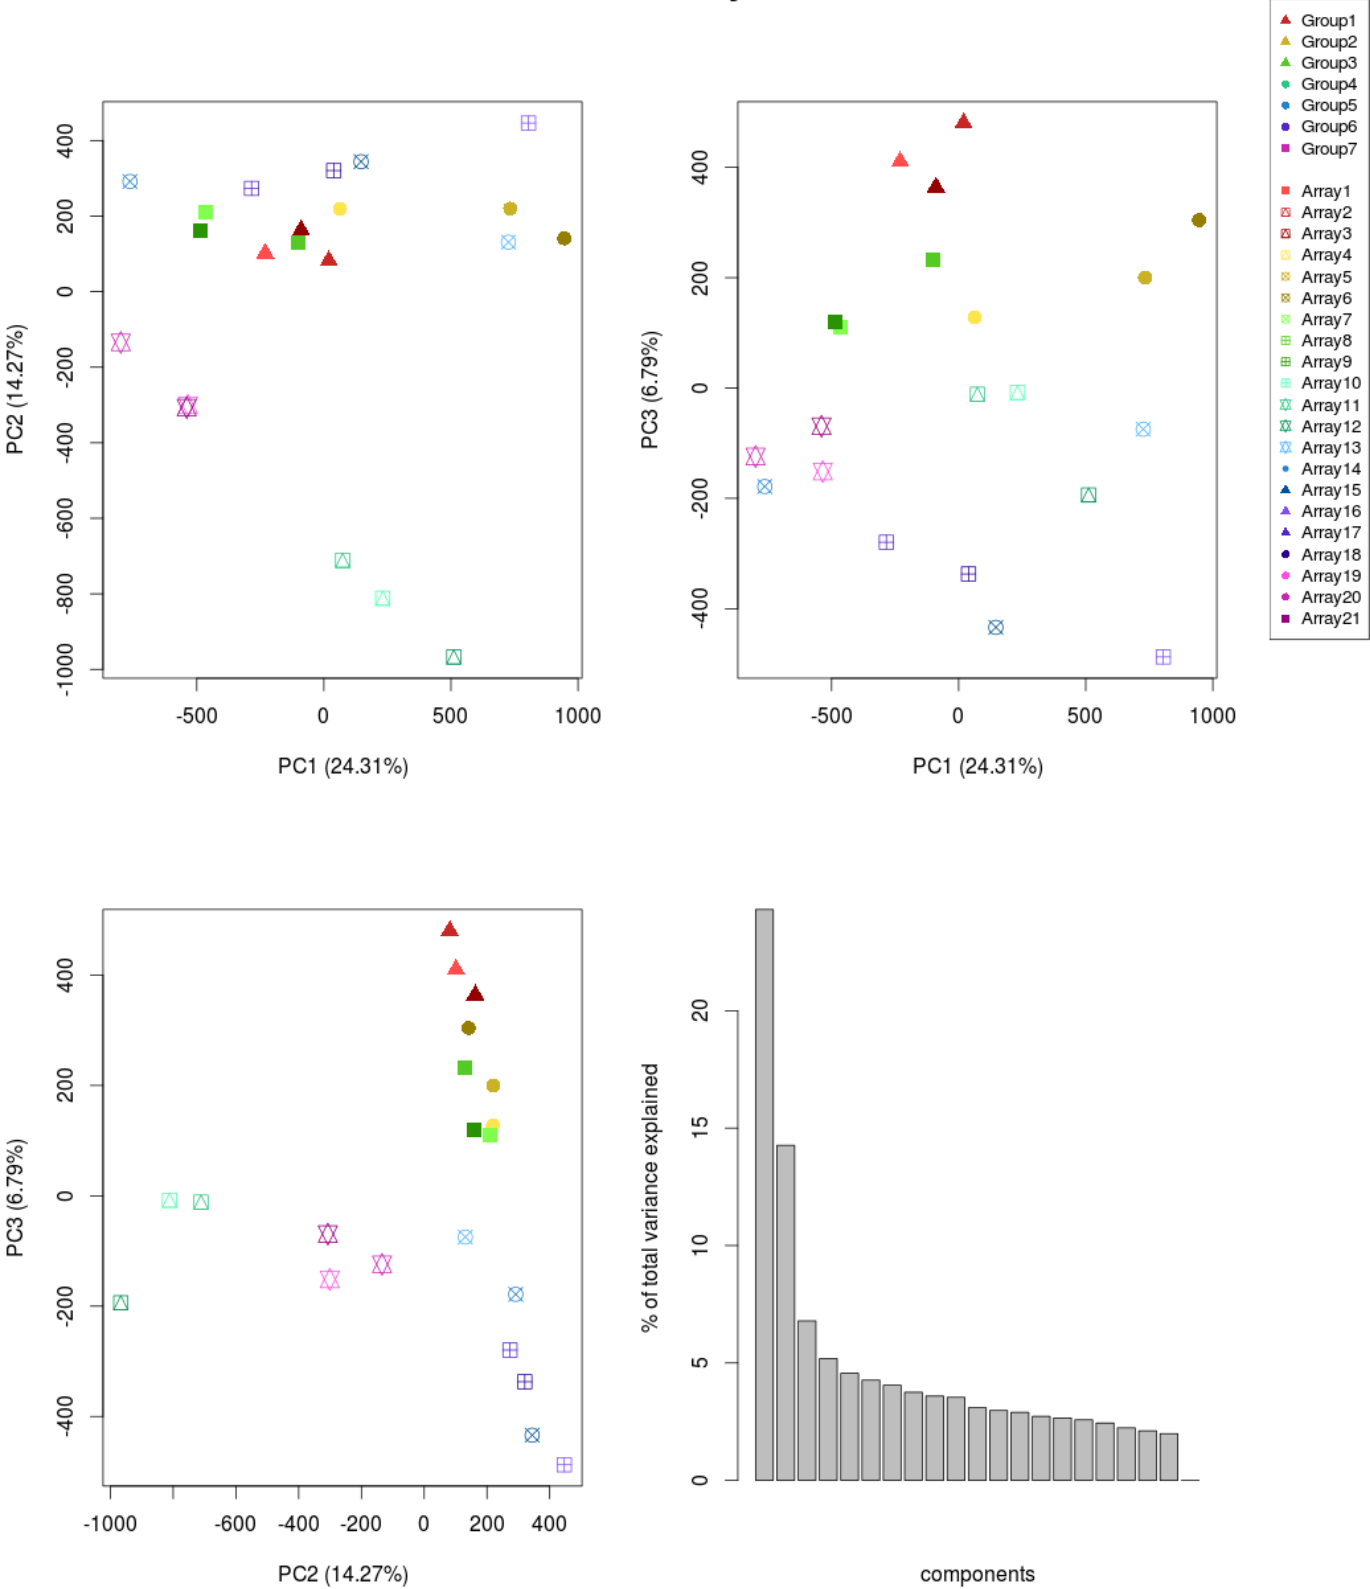



Cluster dendrogram of raw data

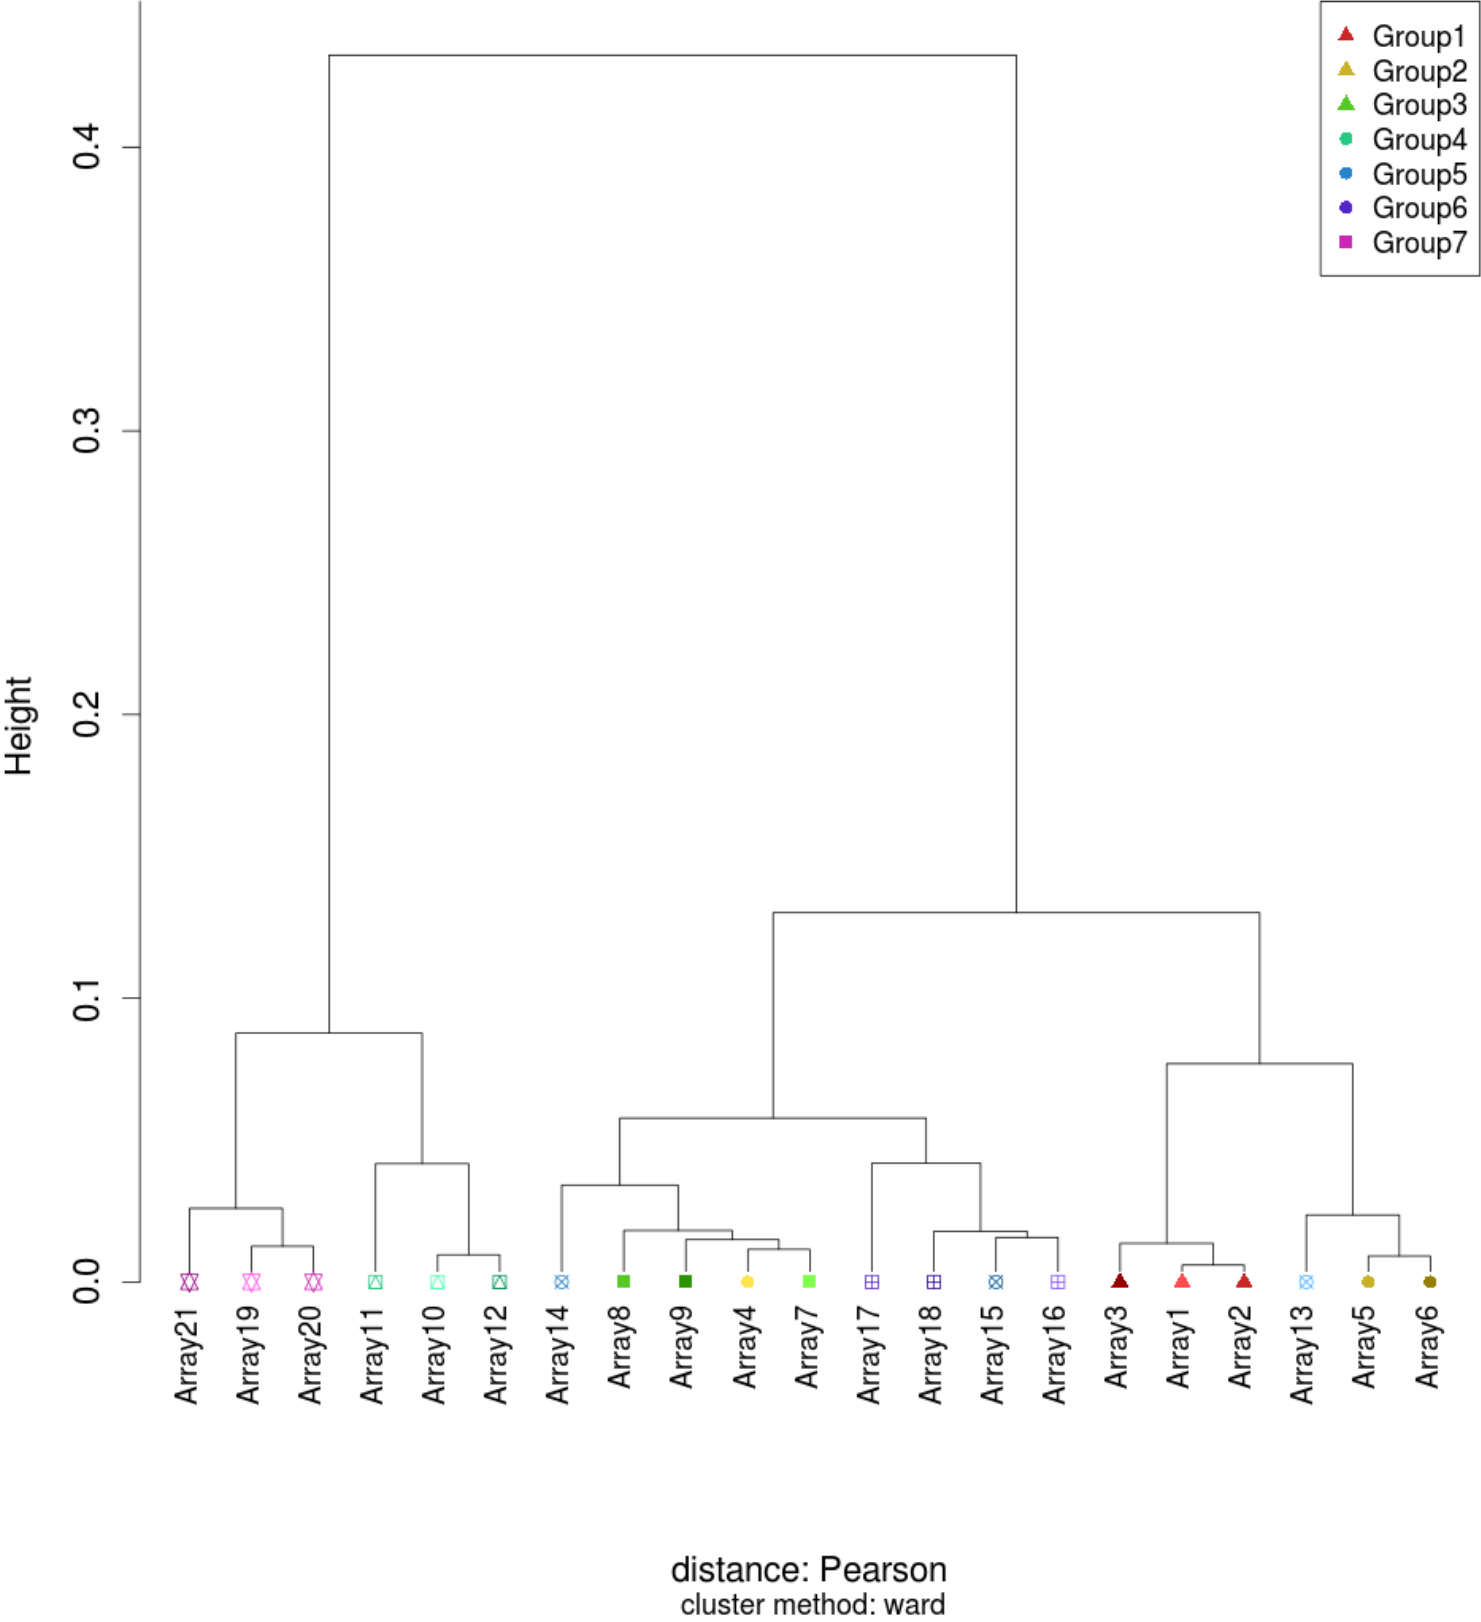

## Pre-processing of Raw Data

Method: RMA

Annotation: hugene10st\_Hs\_ENSG

# Boxplot after RMA

Distributions should be comparable between arrays

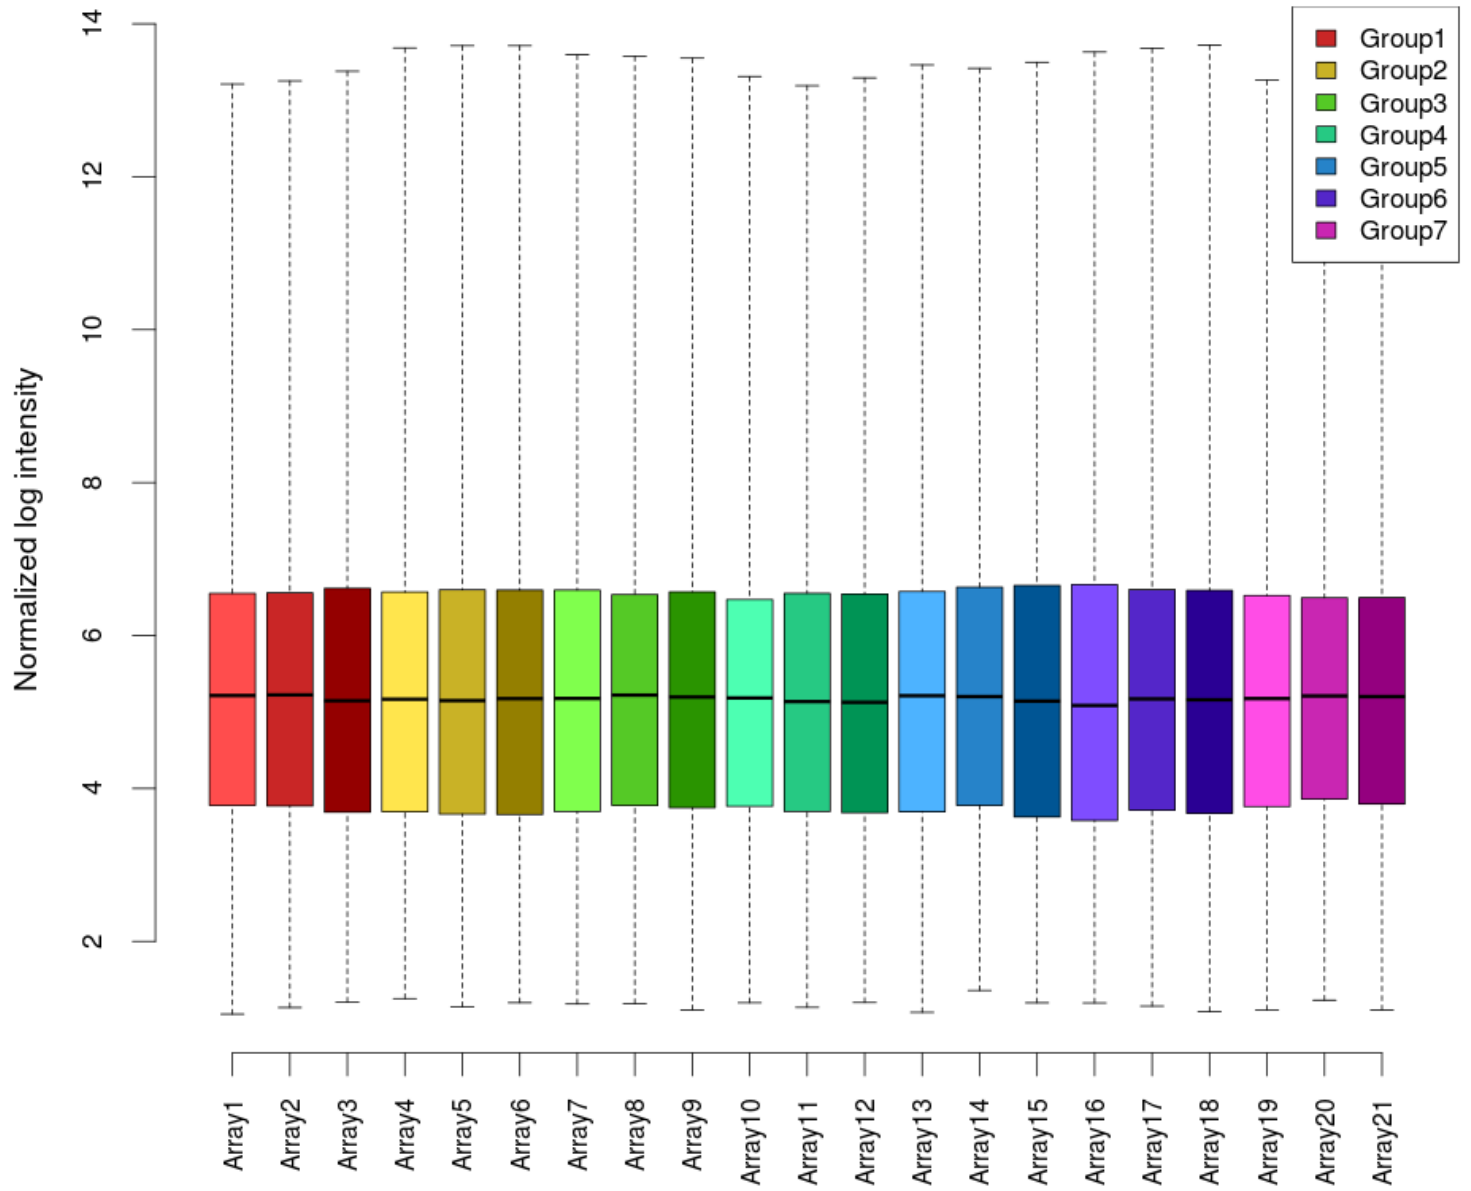

# Density histogram after RMA

Curves should be comparable between arrays

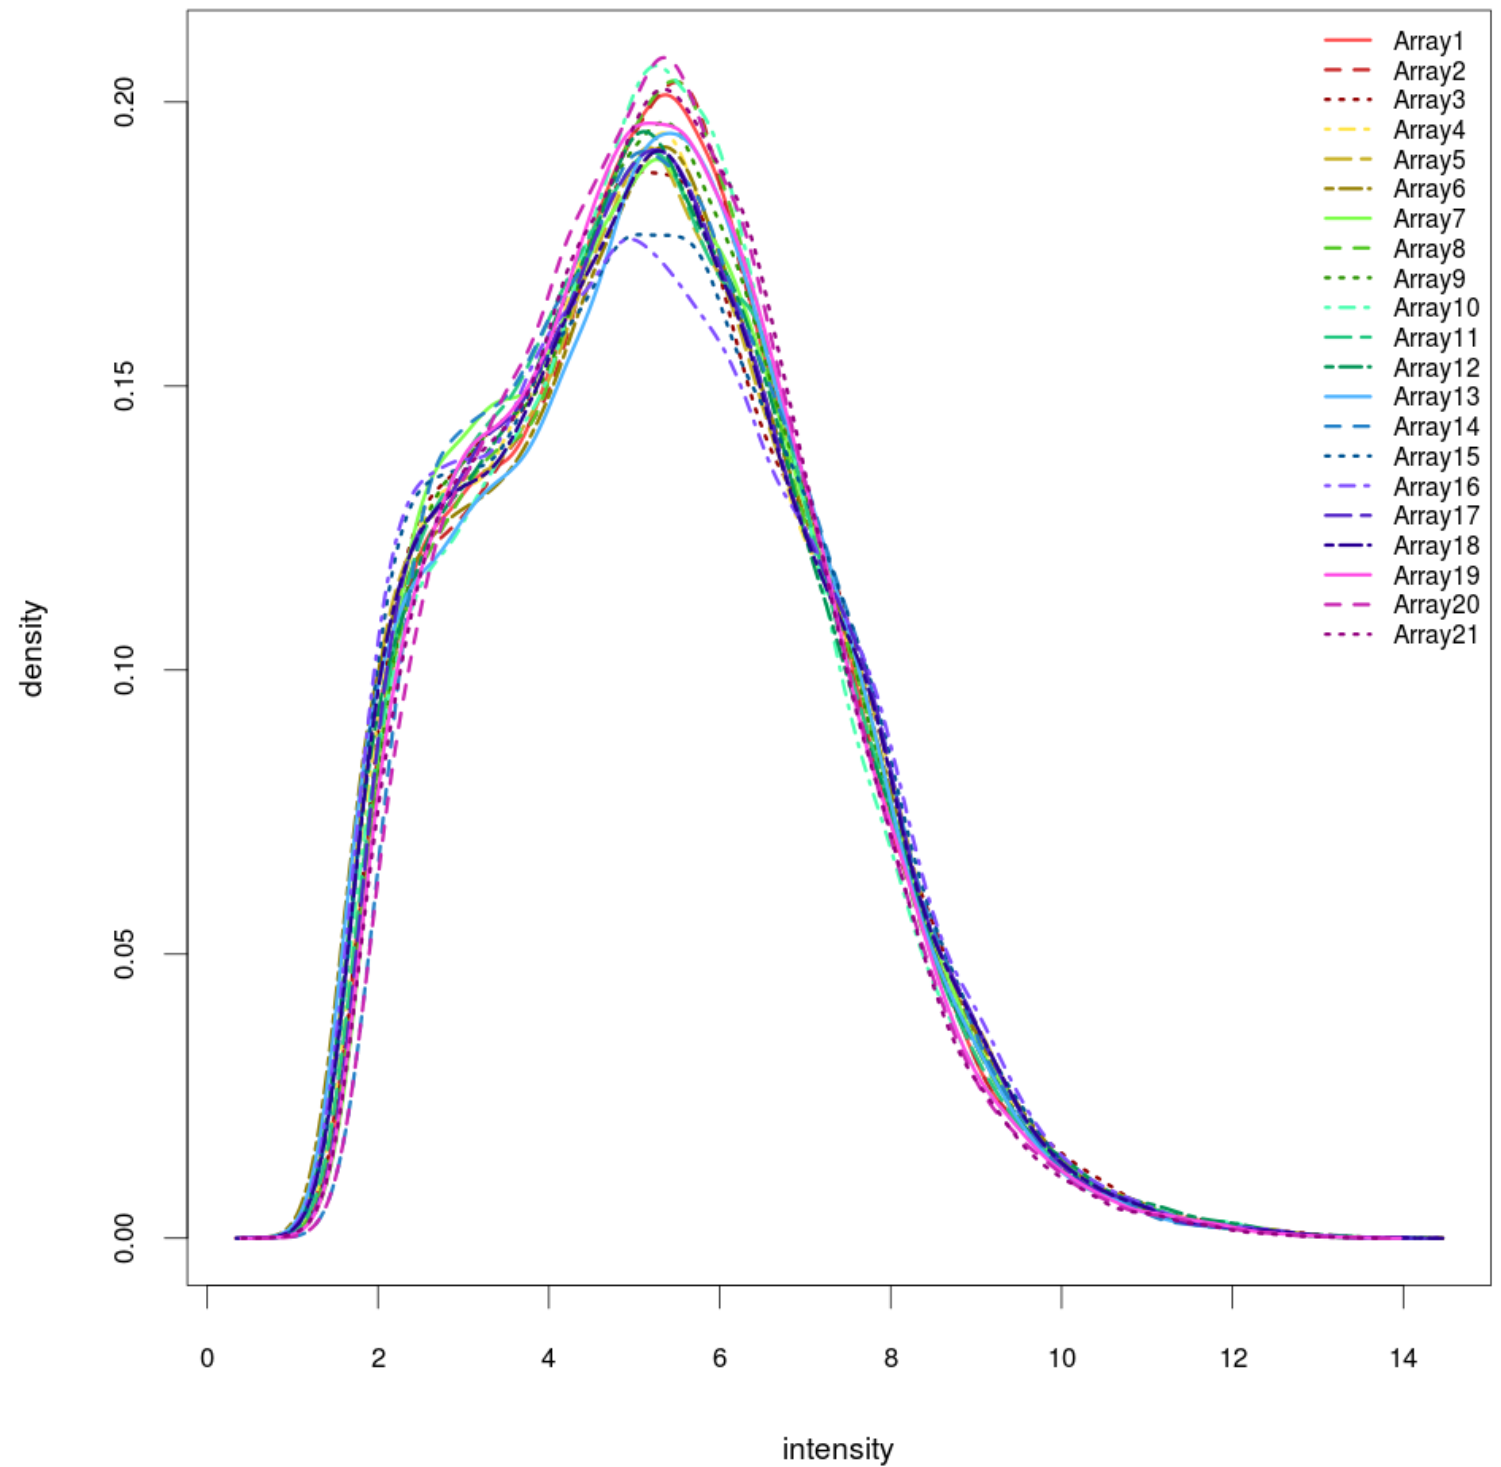

# MA plots after RMA normalization 1 / 2

Array1 vs pseudo-median reference chip

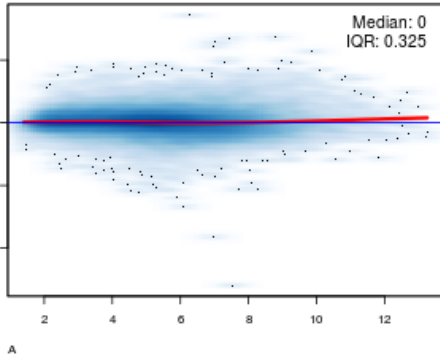

Array2 vs pseudo-median reference chip

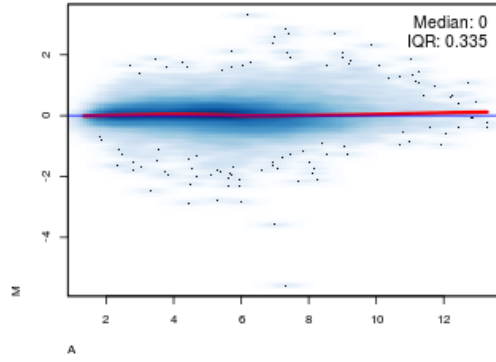

Array3 vs pseudo-median reference chip

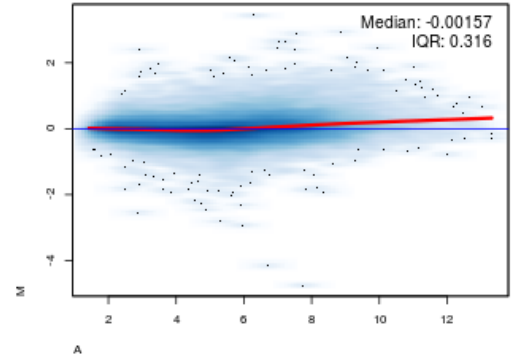

Array4 vs pseudo-median reference chip

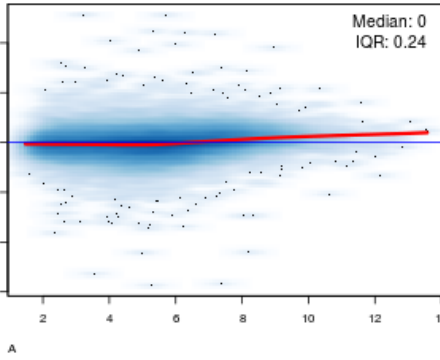

Array5 vs pseudo-median reference chip

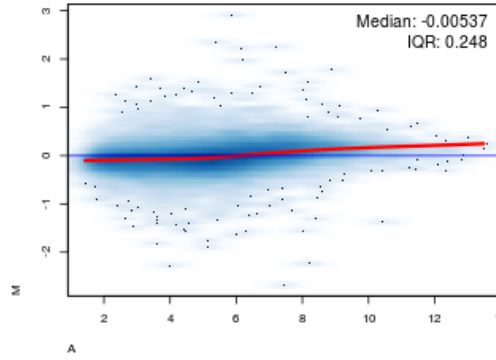

Array6 vs pseudo-median reference chip

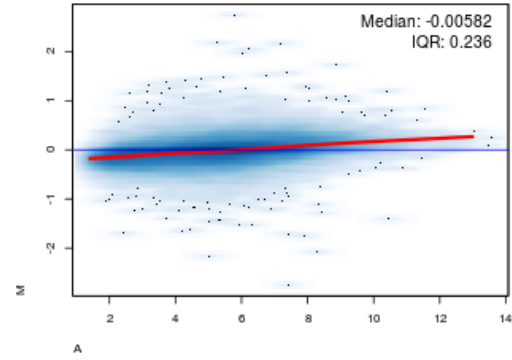

Array7 vs pseudo-median reference chip

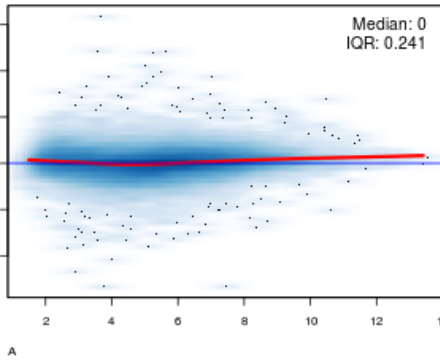

Array8 vs pseudo-median reference chip

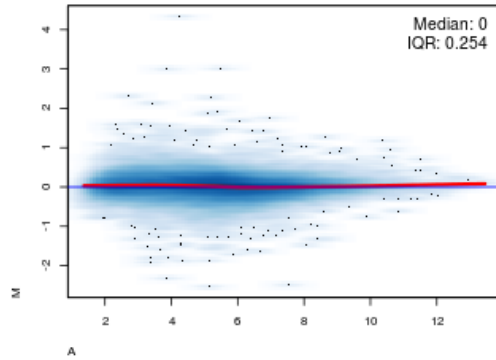

Array9 vs pseudo-median reference chip

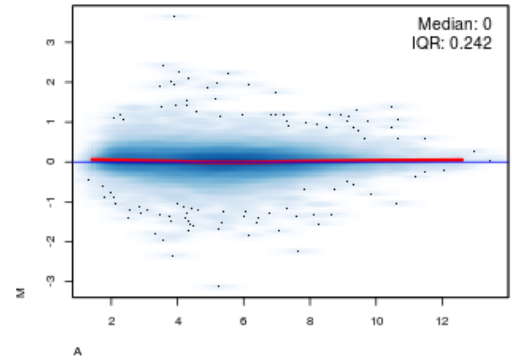

Array10 vs pseudo-median reference chip

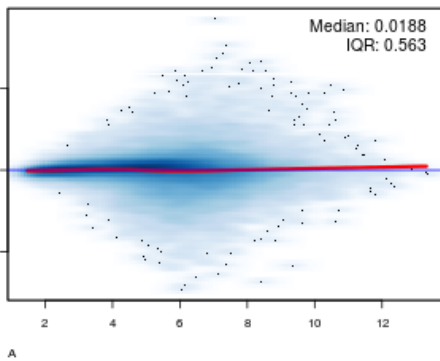

Array11 vs pseudo-median reference chip

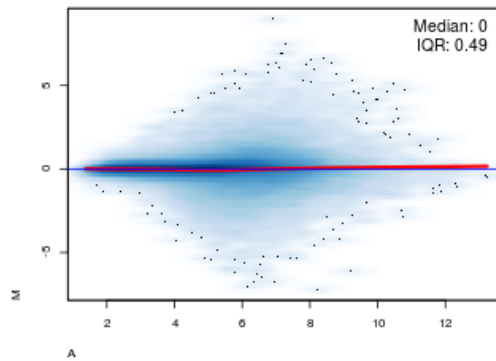

Array12 vs pseudo-median reference chip

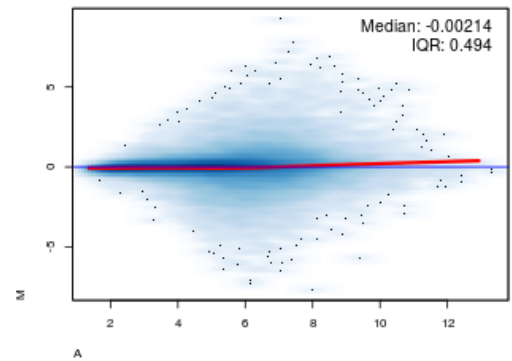

Array13 vs pseudo-median reference chip

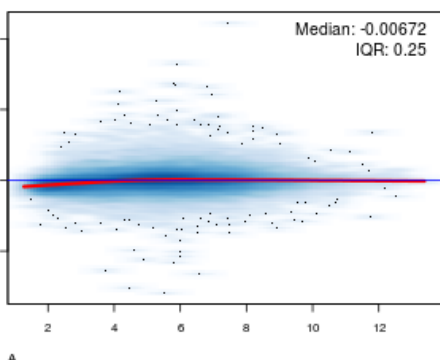

Array14 vs pseudo-median reference chip

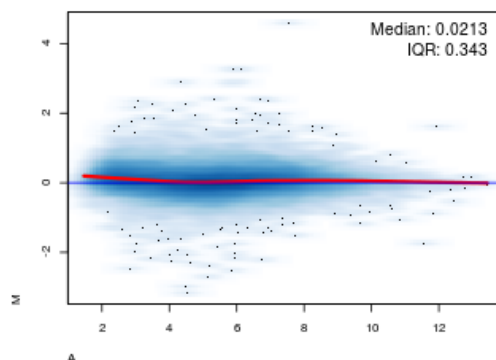

Array15 vs pseudo-median reference chip

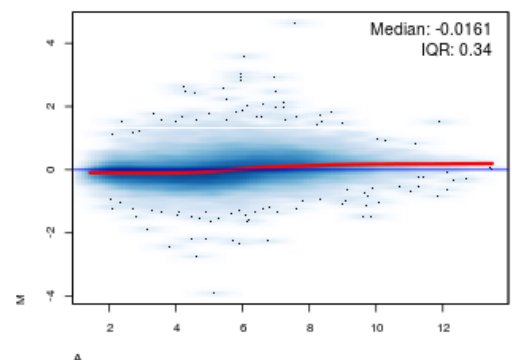

## MA plots afterRMANormalization 2 / 2

Array16 vs pseudo-median reference chip

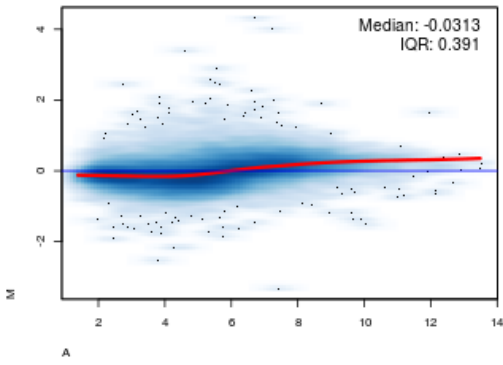

Array17 vs pseudo-median reference chip

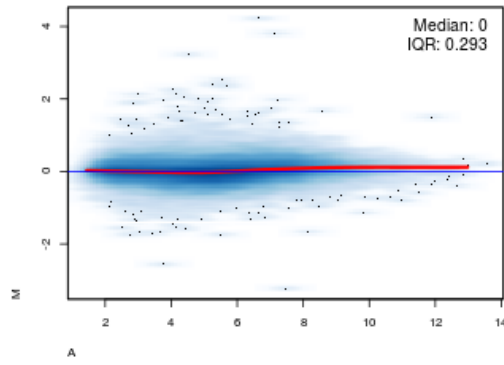

Array18 vs pseudo-median reference chip

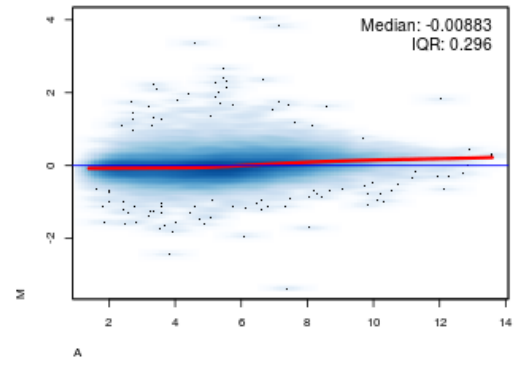

Array19 vs pseudo-median reference chip

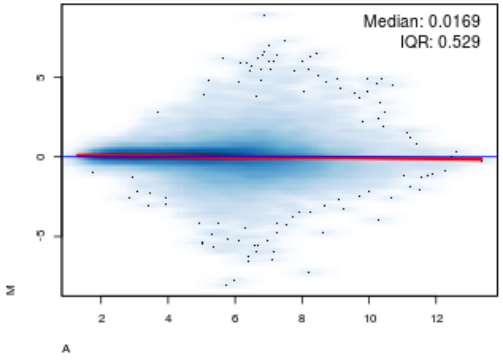

Array20 vs pseudo-median reference chip

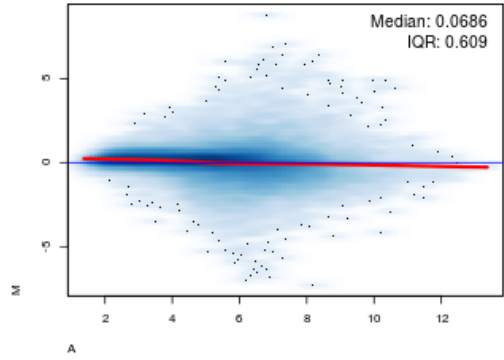

Array21 vs pseudo-median reference chip

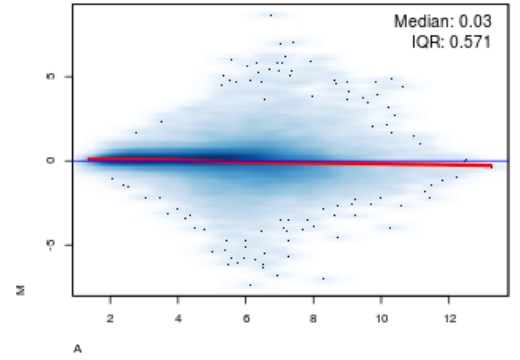

Heatmap visualization showing the relationship between 21 arrays. The color scale ranges from red (high relationship) to yellow (low relationship). The arrays are labeled on the left and right sides of the heatmap.

Arrays (Left to Right):

- Array10
- Array11
- Array12
- Array20
- Array21
- Array19
- Array14
- Array15
- Array13
- Array17
- Array16
- Array18
- Array3
- Array2
- Array1
- Array8
- Array7
- Array9
- Array4
- Array5
- Array6

Arrays (Top to Bottom):

- Array6
- Array5
- Array4
- Array9
- Array7
- Array8
- Array1
- Array2
- Array3
- Array18
- Array16
- Array17
- Array13
- Array15
- Array14
- Array19
- Array21
- Array20
- Array12
- Array11
- Array10

# PCA analysis after RMA normalization

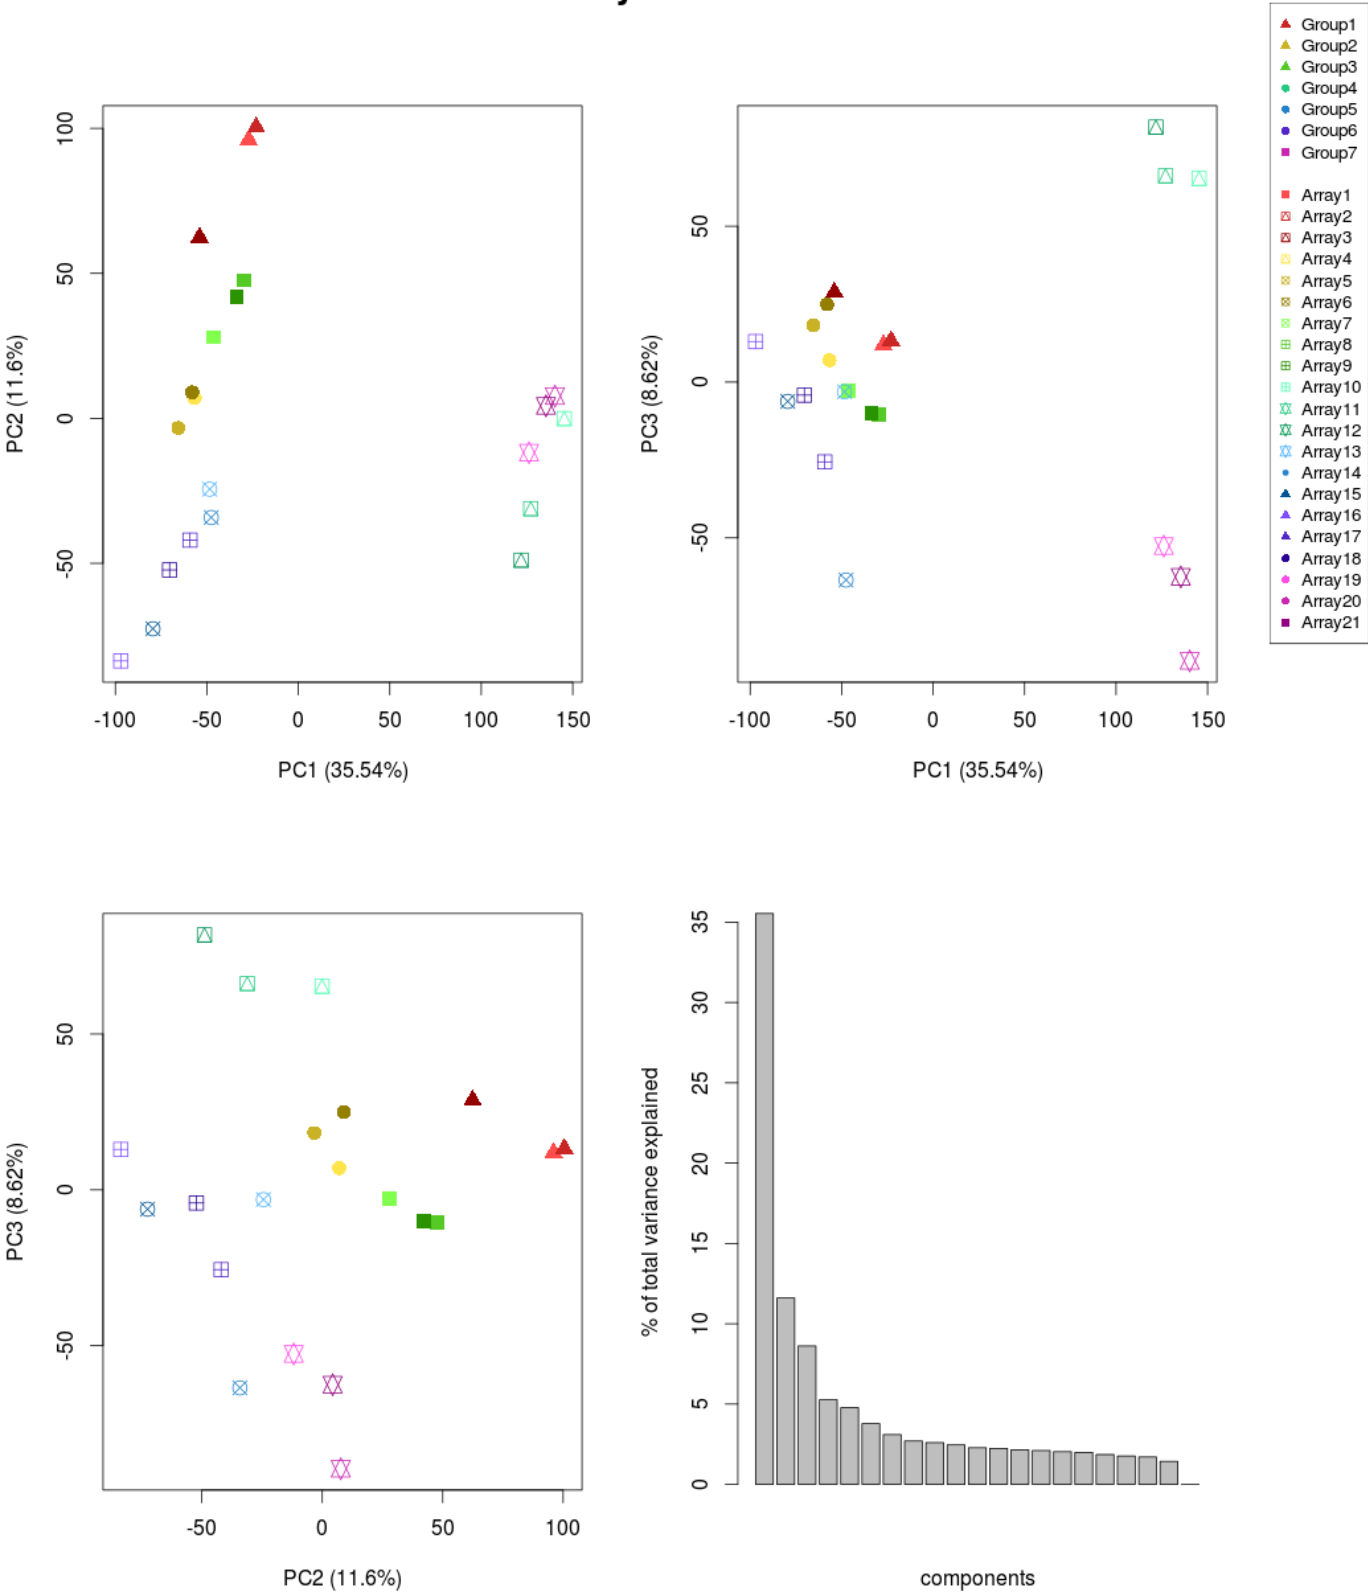



Cluster dendrogram of RMA normalized data

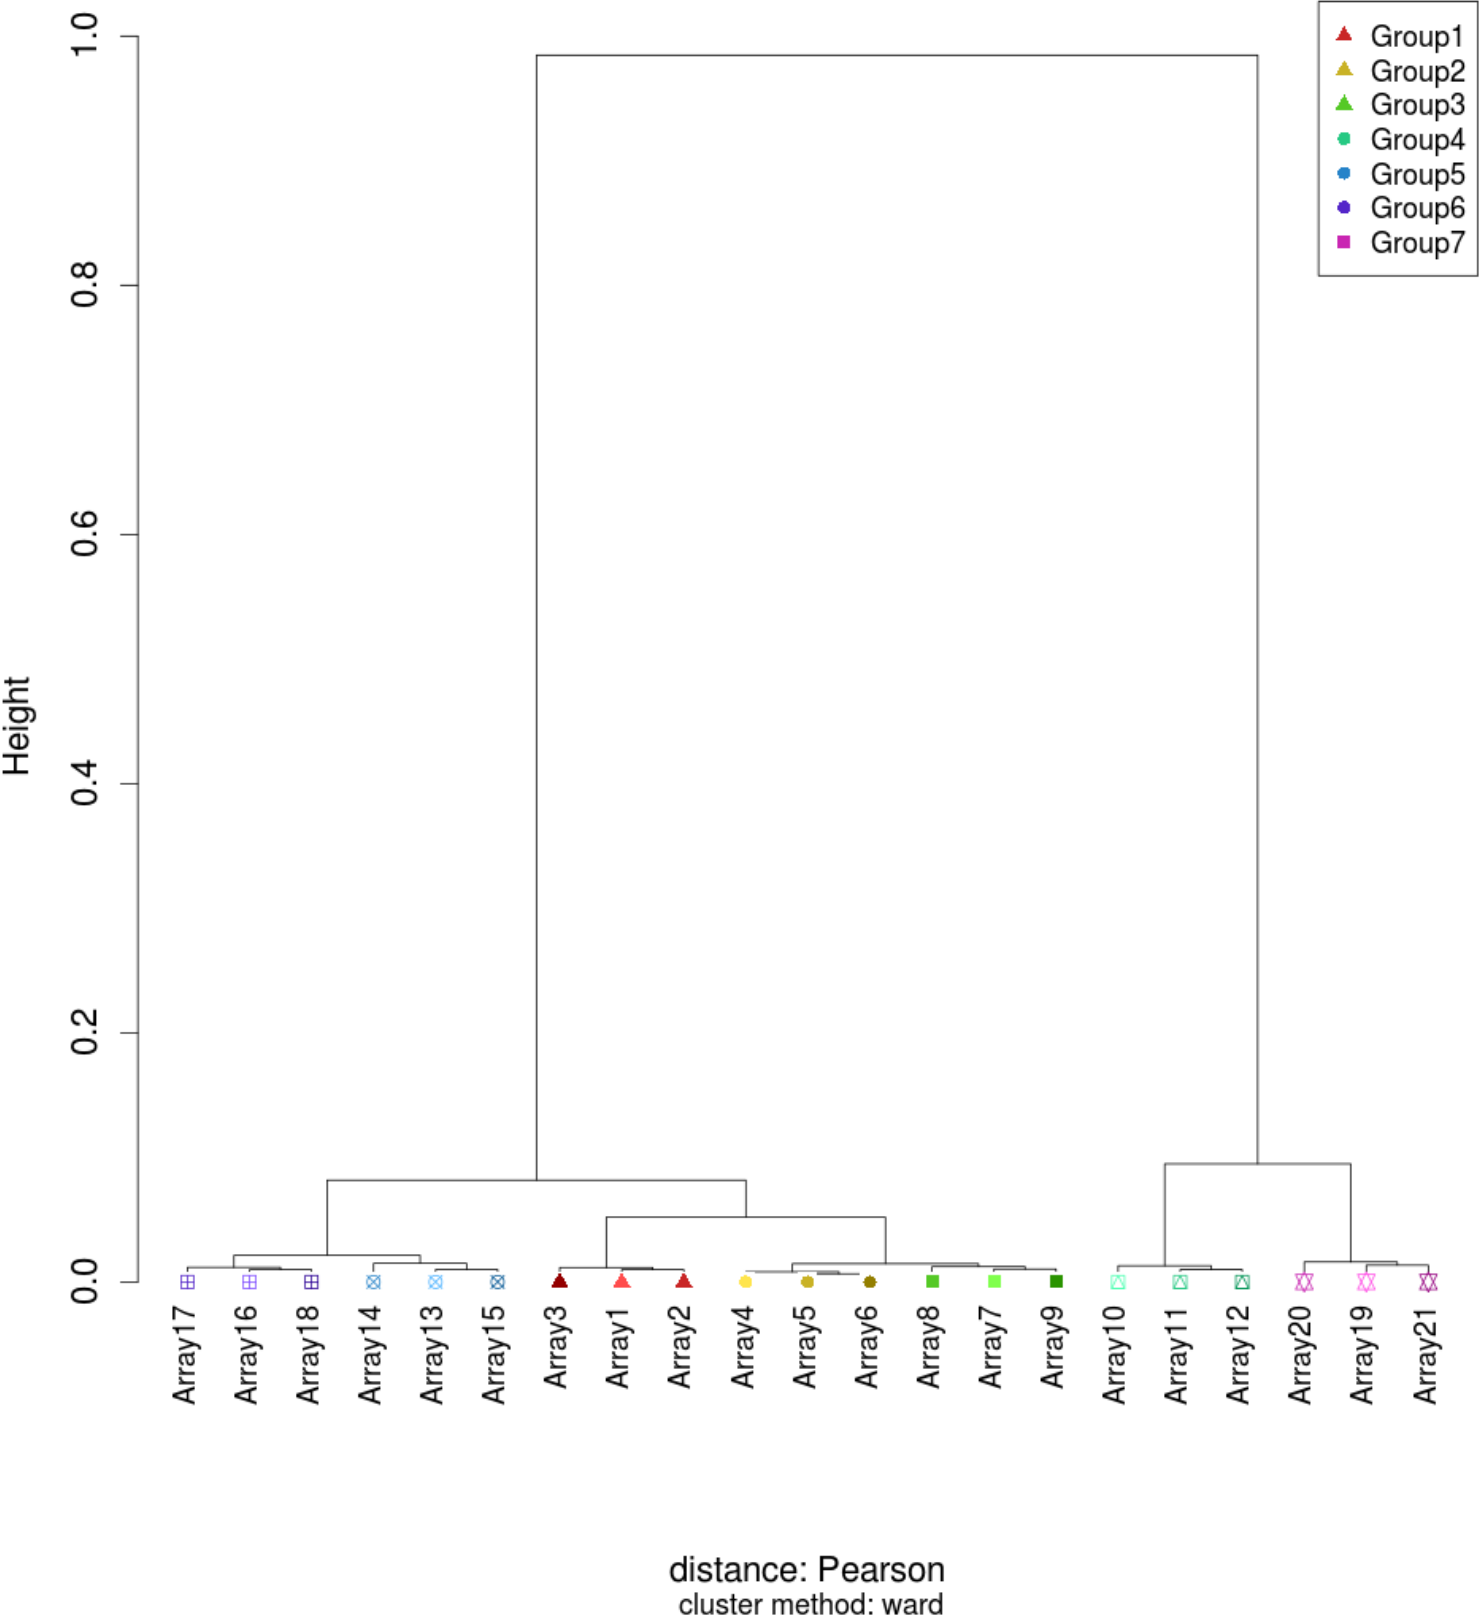

Supplement: Supplementary file 4 [file 2]
