# Supplementary material
Source: publisher figshare collection journal article supplement (https://tandf.figshare.com/articles/dataset/_/7886671)

Quality Control & Pre-processing Evaluation  
of  
E-GEOD-4600.raw.1\_0  
**REPORT**

## Array names and grouping

| ArrayDataFile | SourceName | FactorValue |
|---------------|------------|-------------|
| GSM102842.CEL | Array1     | Group1      |
| GSM102878.CEL | Array2     | Group2      |
| GSM102883.CEL | Array3     | Group3      |
| GSM102825.CEL | Array4     | Group1      |
| GSM102879.CEL | Array5     | Group2      |
| GSM102880.CEL | Array6     | Group2      |
| GSM102881.CEL | Array7     | Group3      |
| GSM102876.CEL | Array8     | Group4      |
| GSM102877.CEL | Array9     | Group4      |
| GSM102875.CEL | Array10    | Group4      |
| GSM102882.CEL | Array11    | Group3      |
| GSM102870.CEL | Array12    | Group1      |

# Summary of raw data quality indicators

blue = "within" / red = "out of" recommended cut-off

|         | 3'/5' beta-actin<br>(cutoff=3) | 3'/5' GAPDH<br>(cutoff= 1.25) | Hybridization<br>BioB<BioC<BioD<CreX | Hybridization<br>BioB=Present | Percent Present<br>spread<= 10% | Background<br>spread<=20% | Log Scale Factor<br>spread<=3 |
|---------|--------------------------------|-------------------------------|--------------------------------------|-------------------------------|---------------------------------|---------------------------|-------------------------------|
| Array1  | 1.01                           | 1.02                          | T                                    | P                             | 30 %                            | 83                        | 0.9                           |
| Array4  | 1.02                           | 1.02                          | T                                    | P                             | 33 %                            | 117                       | 0.66                          |
| Array12 | 1.02                           | 1.02                          | T                                    | P                             | 33 %                            | 74                        | 0.75                          |
| Array2  | 1.01                           | 1.01                          | T                                    | P                             | 31 %                            | 85                        | 1.26                          |
| Array5  | 1.03                           | 1.03                          | T                                    | P                             | 32 %                            | 68                        | 1                             |
| Array6  | 1.01                           | 1.02                          | T                                    | P                             | 34 %                            | 66                        | 0.91                          |
| Array3  | 1.01                           | 1.02                          | T                                    | P                             | 34 %                            | 76                        | 0.67                          |
| Array7  | 1.01                           | 1.02                          | T                                    | P                             | 29 %                            | 121                       | 1.14                          |
| Array11 | 1.01                           | 1.02                          | T                                    | P                             | 33 %                            | 67                        | 0.97                          |
| Array8  | 1.04                           | 1.03                          | T                                    | P                             | 34 %                            | 72                        | 0.64                          |
| Array9  | 1.02                           | 1.02                          | T                                    | P                             | 34 %                            | 81                        | 0.63                          |
| Array10 | 1.02                           | 1.01                          | T                                    | P                             | 34 %                            | 87                        | 0.94                          |

# RNA degradation of beta-actin

3'/5' and 3'/M ratios

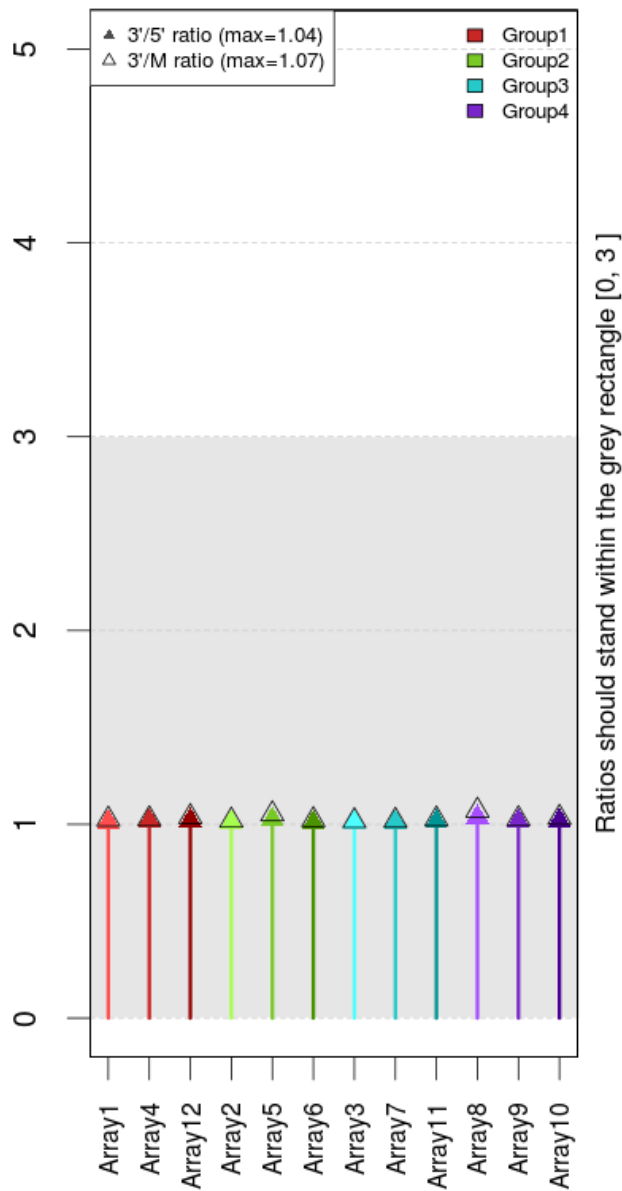

# Boxplot of beta-actin ratios

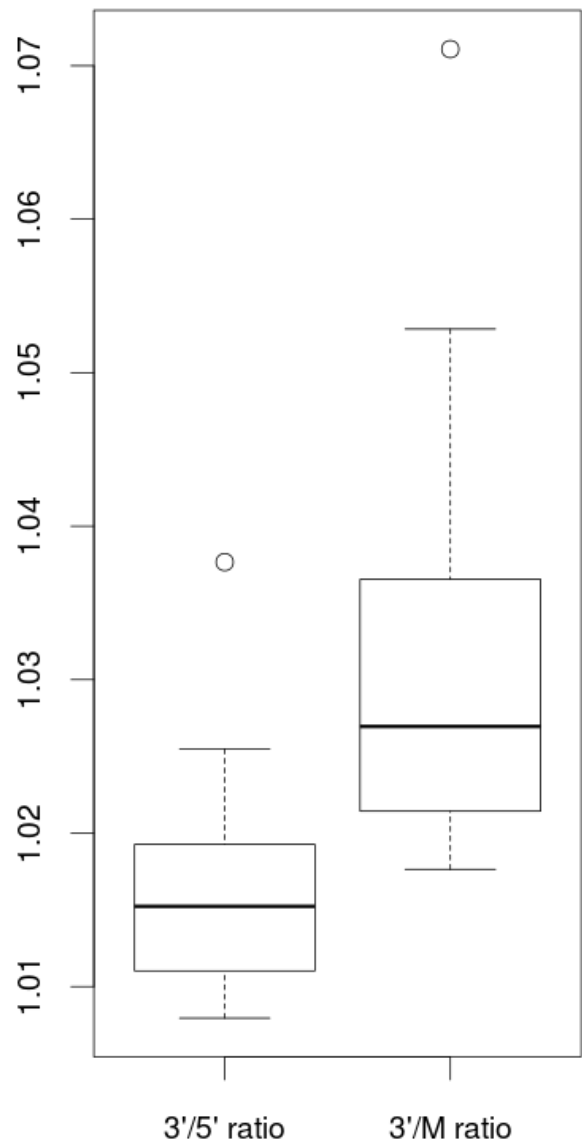

beta-actin QC: OK (all 3'/5' ratios < 3)

# RNA degradation of GAPDH

3'/5' and 3'/M ratios

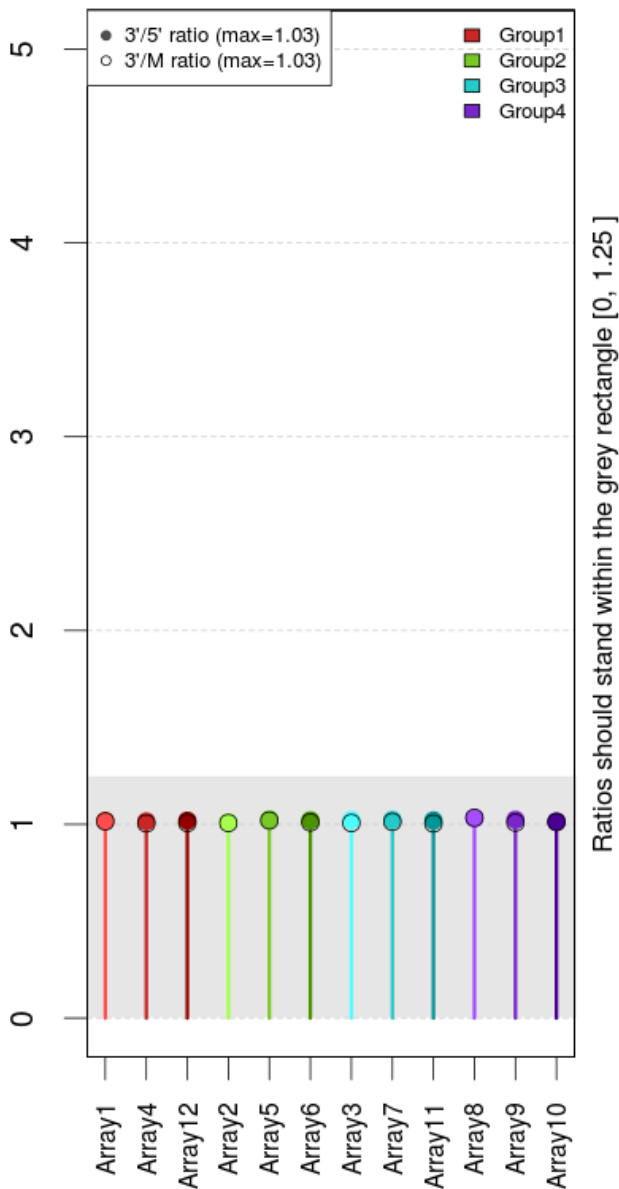

# Boxplot of GAPDH ratios

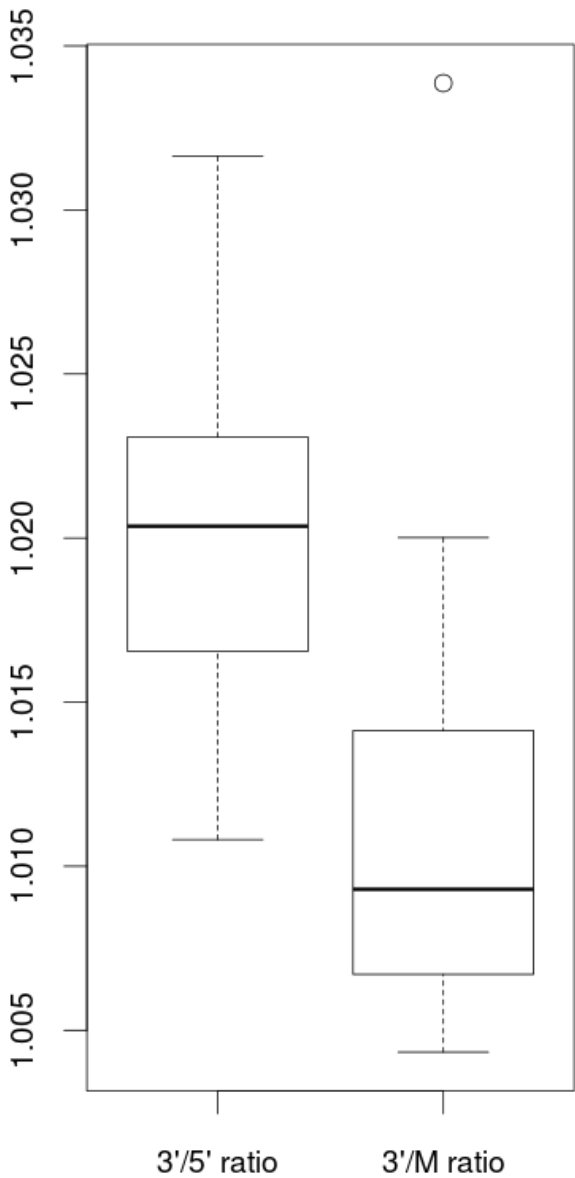

GAPDH QC: OK (all 3'/5' ratios < 1.25)

# RNA degradation plot

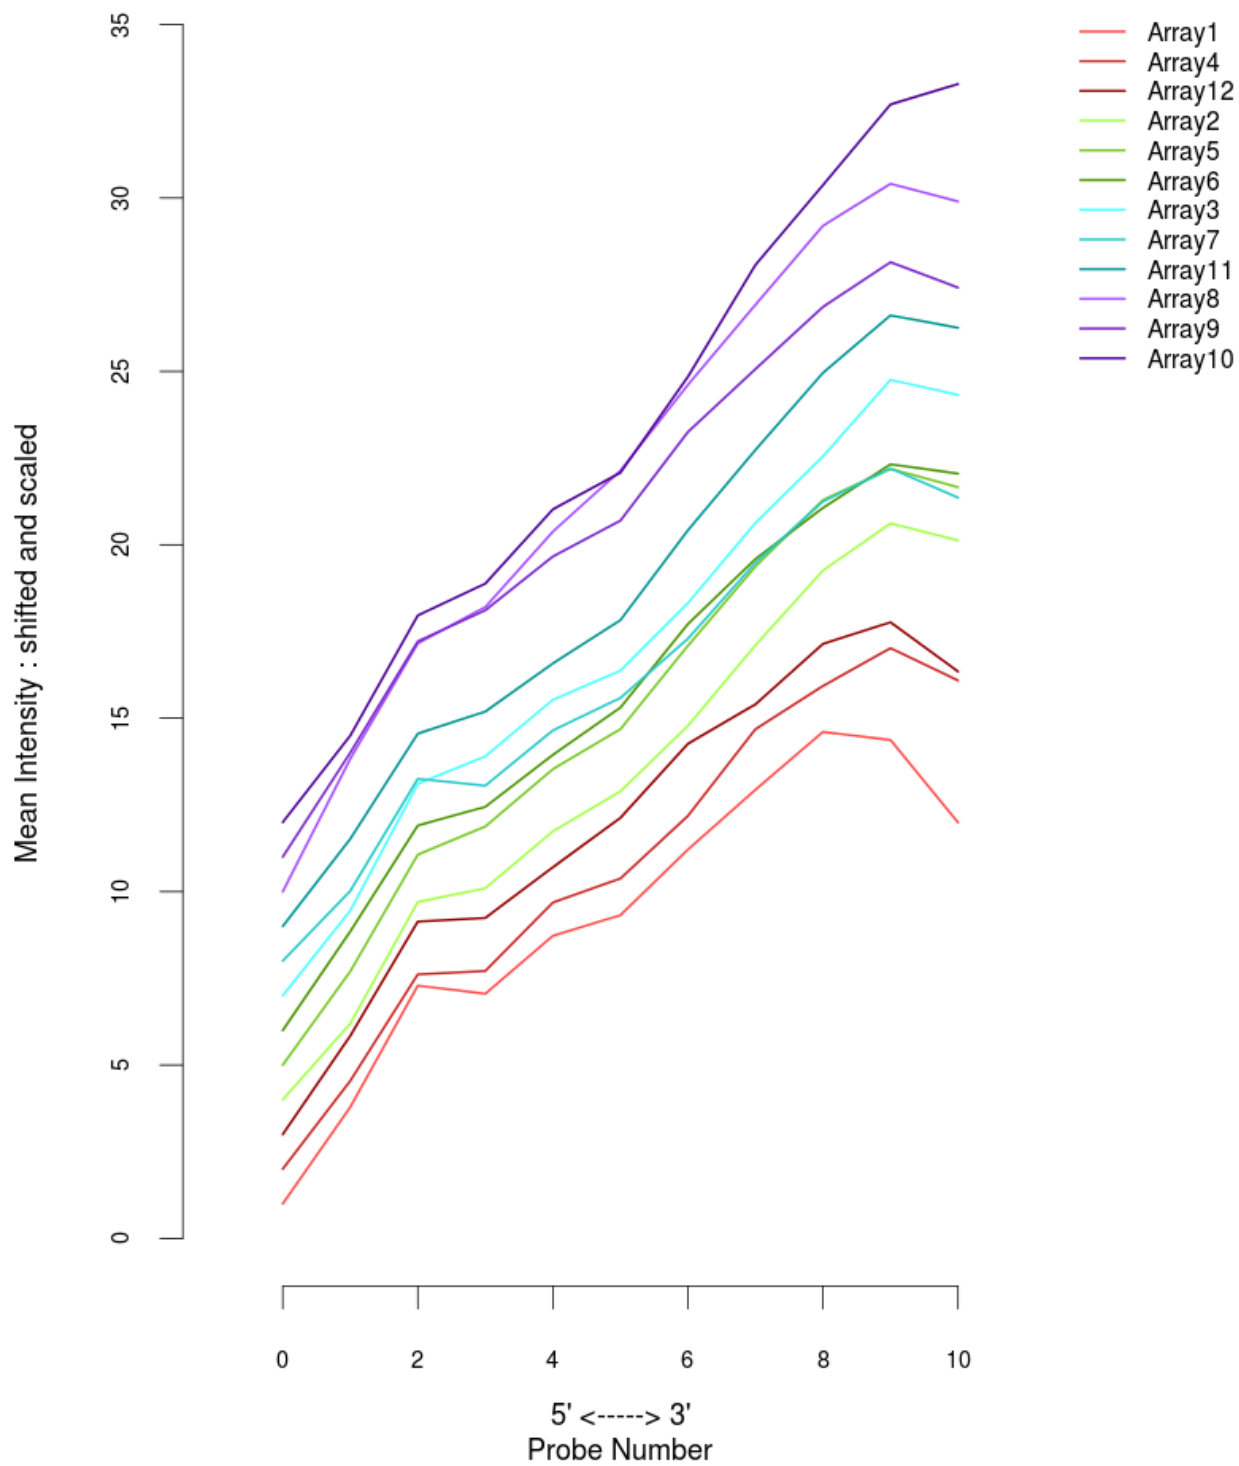

# Spike-in Hybridization controls intensities and calls

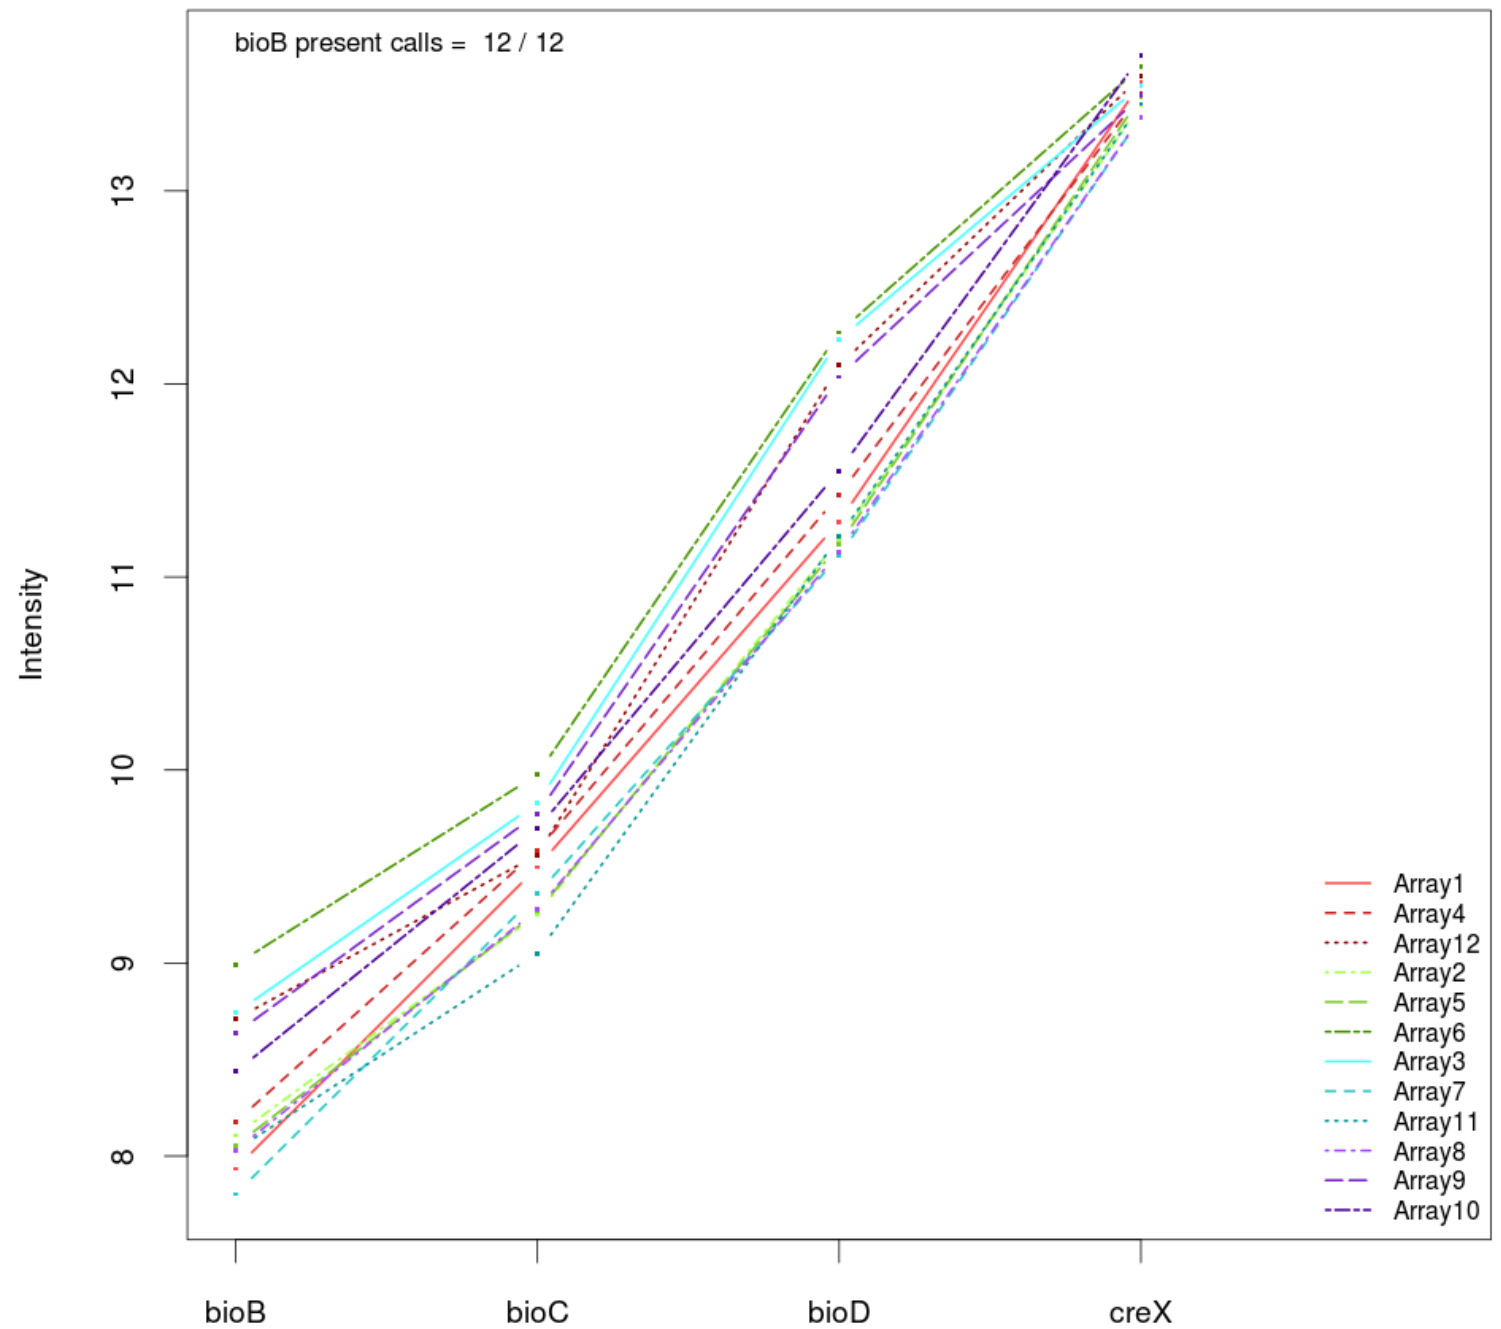

Intensities: OK (bioB < bioC < bioD < creX for all arrays)  
BioB Present calls: OK (indeed all bioB are called present)

Plot of background intensity

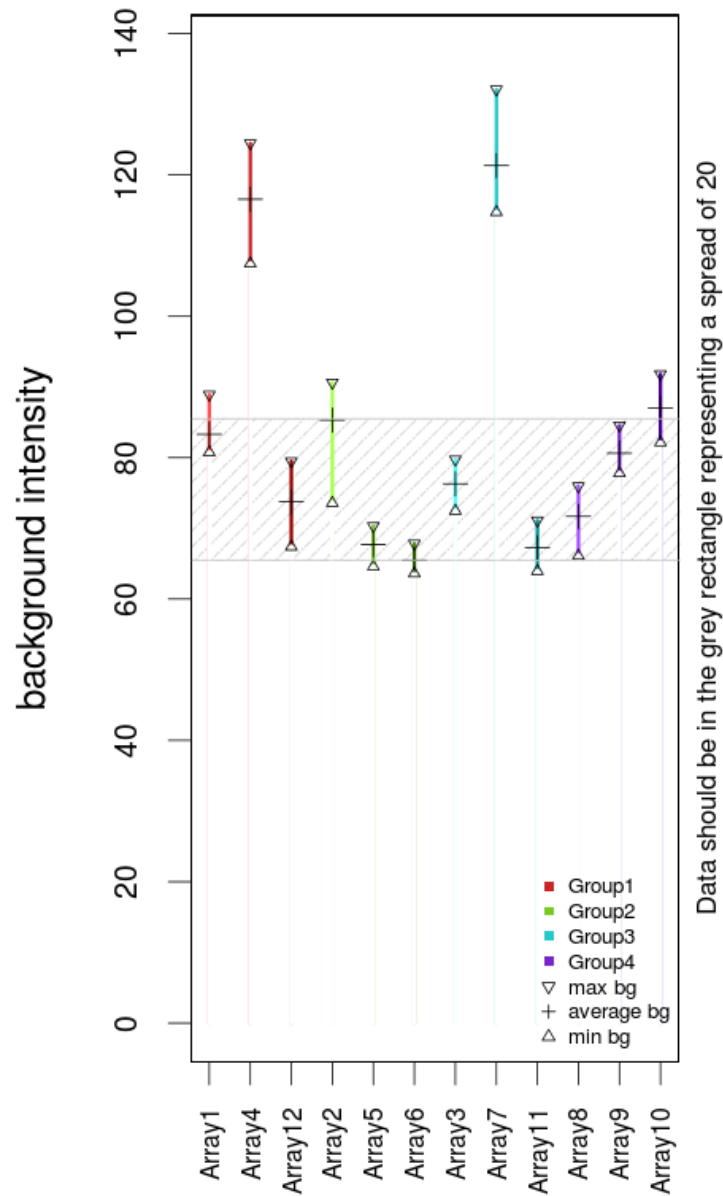

Average background intensity

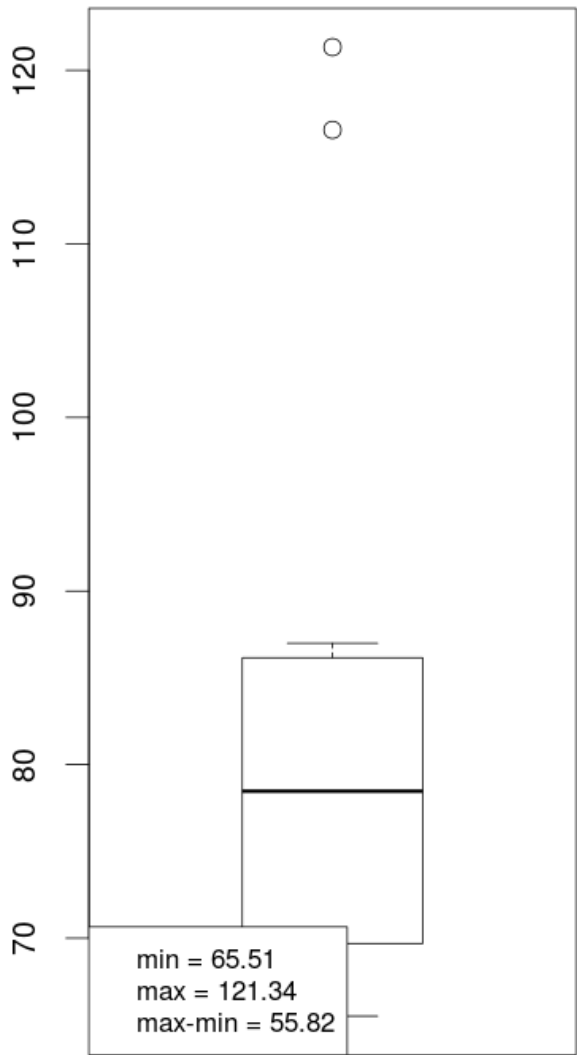

Background QC: not OK (spread > 20)



Plot of percent present

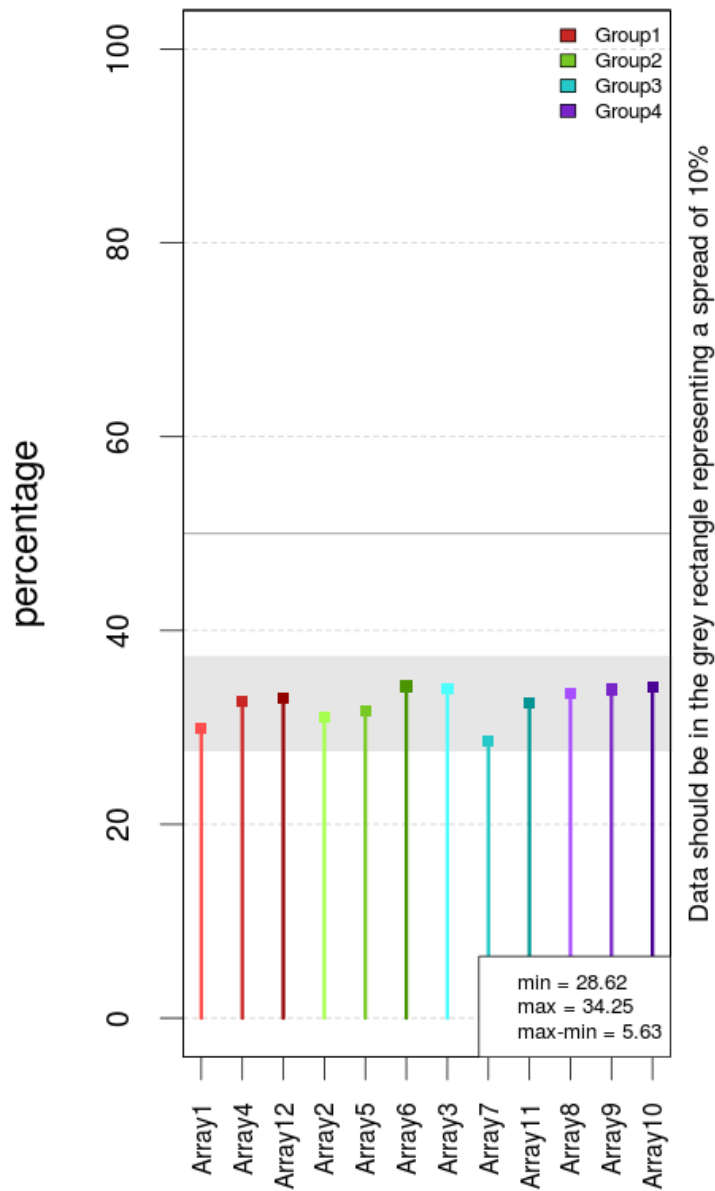

Boxplot of percent present

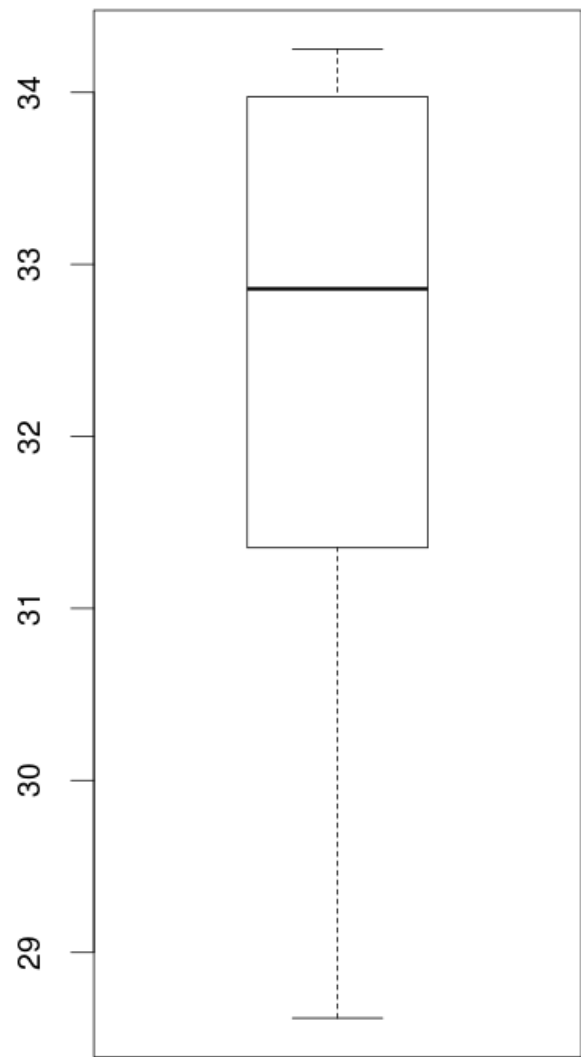

Percent present QC: OK (spread <= 10%)

## affx control profiles

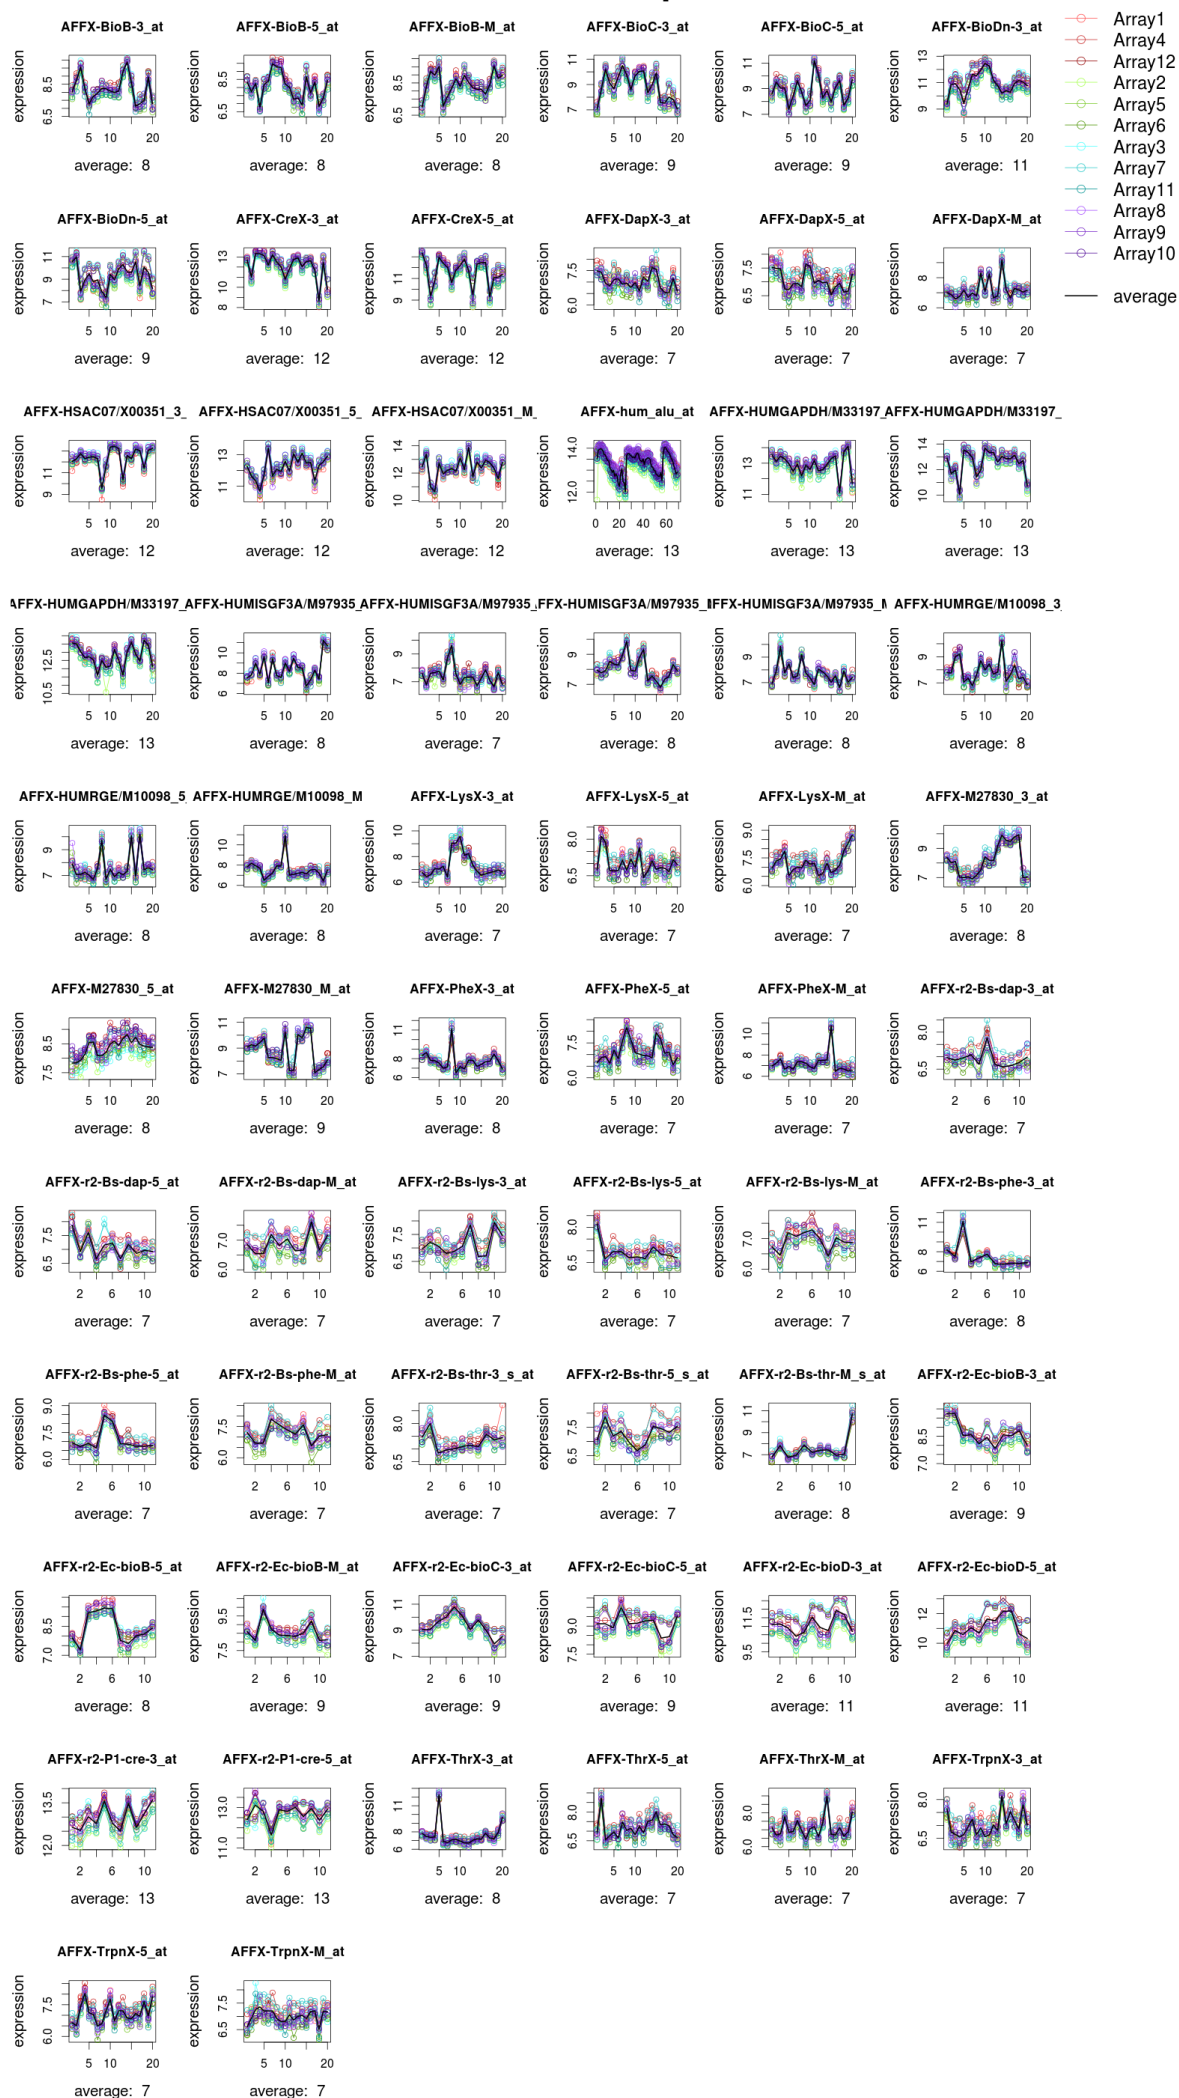

# affx controls

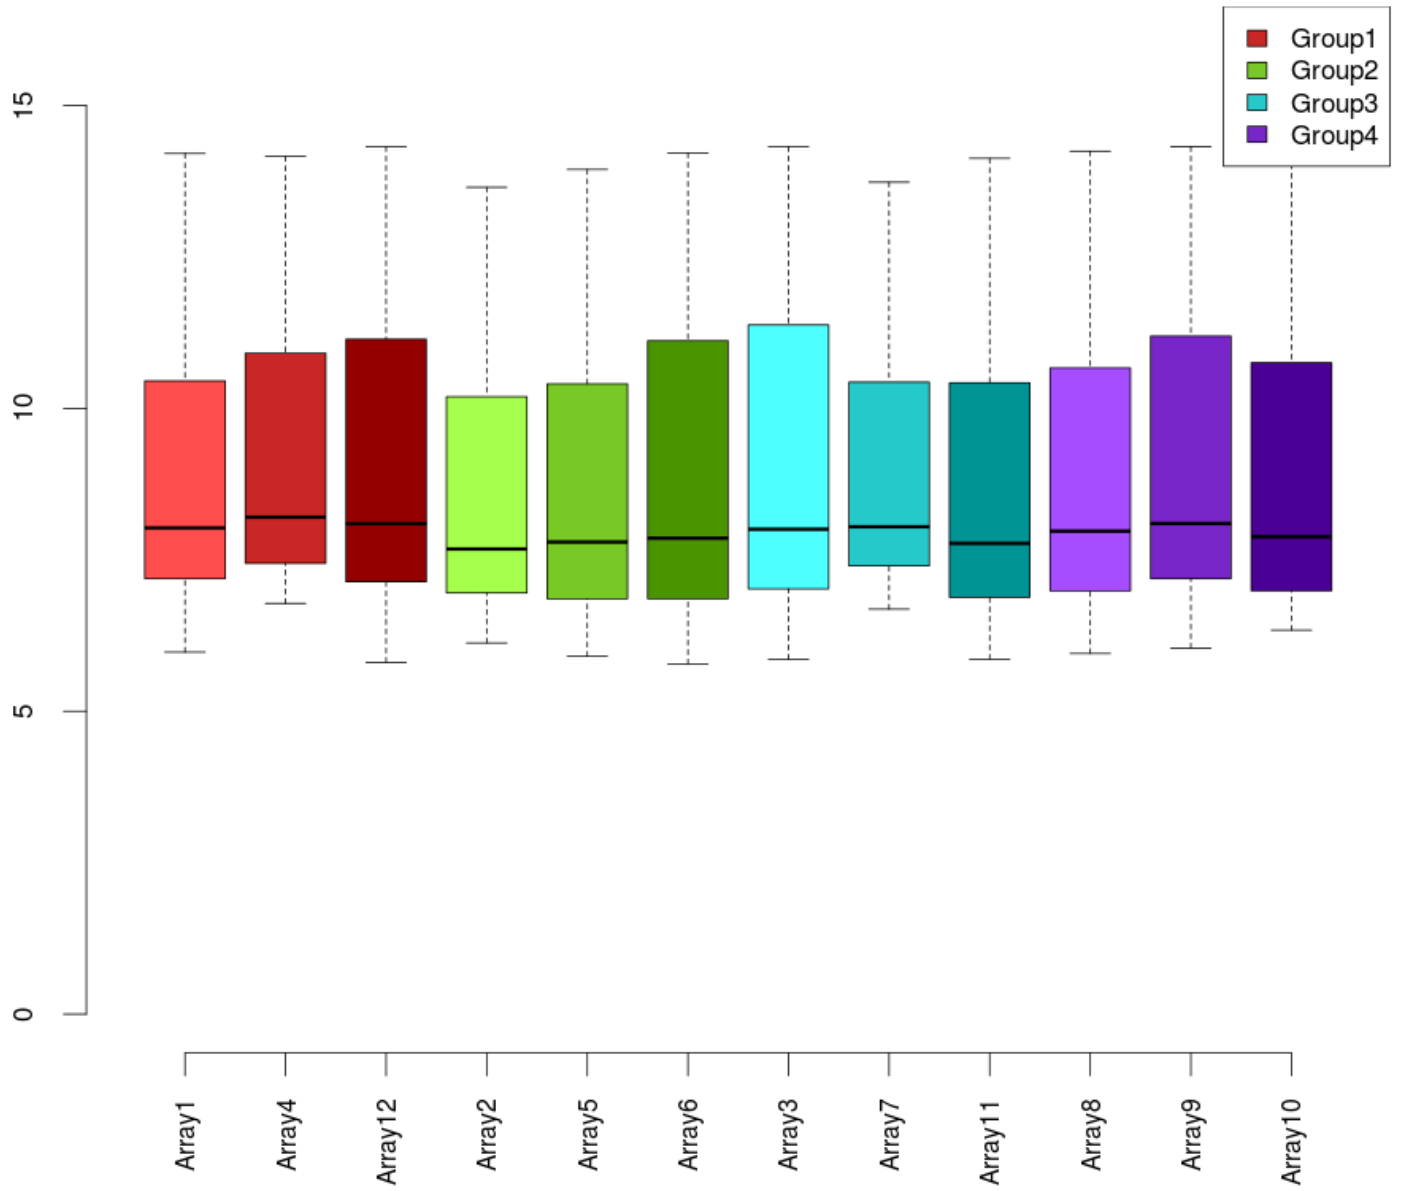

Plot of Log scale factors

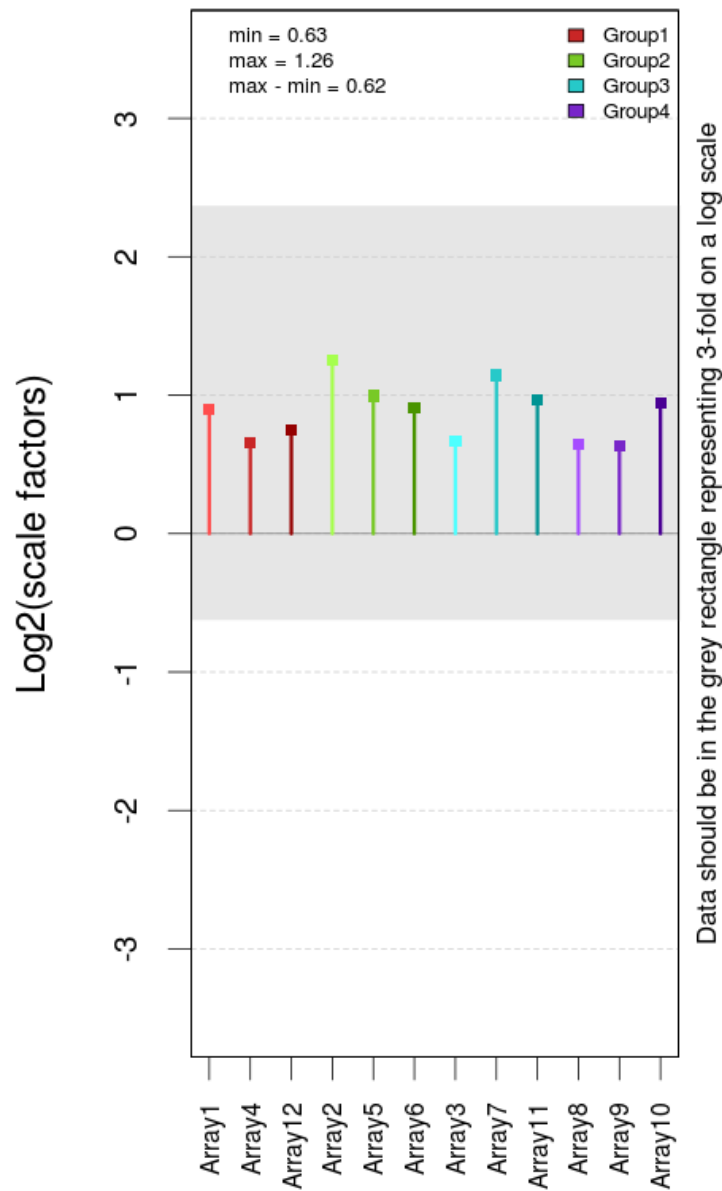

Boxplot of scale factors  
(natural scale)

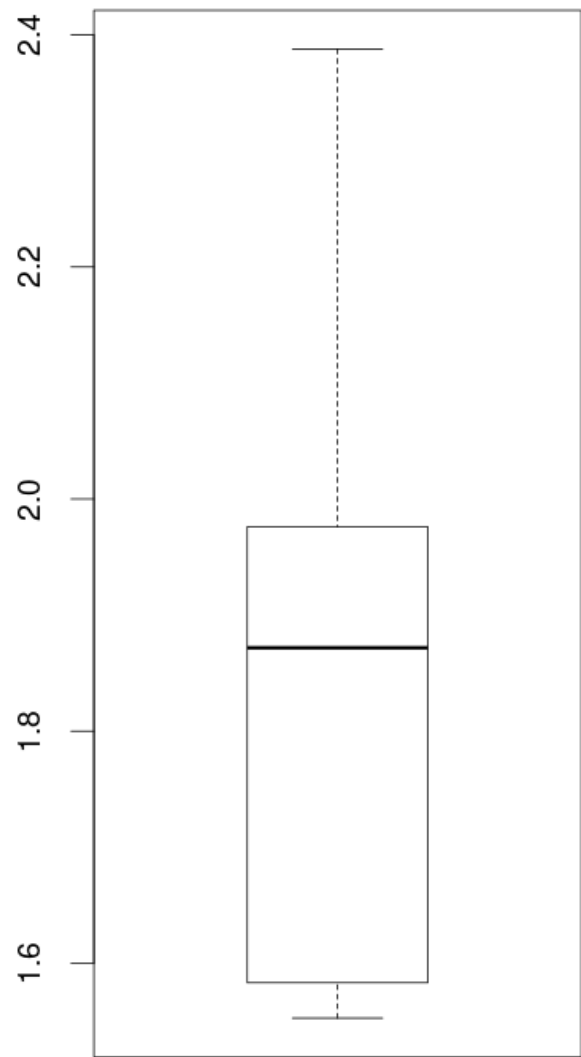

Scale factors QC: OK (spread < 3-fold)

# Boxplot of raw intensities

Distributions should be comparable between arrays

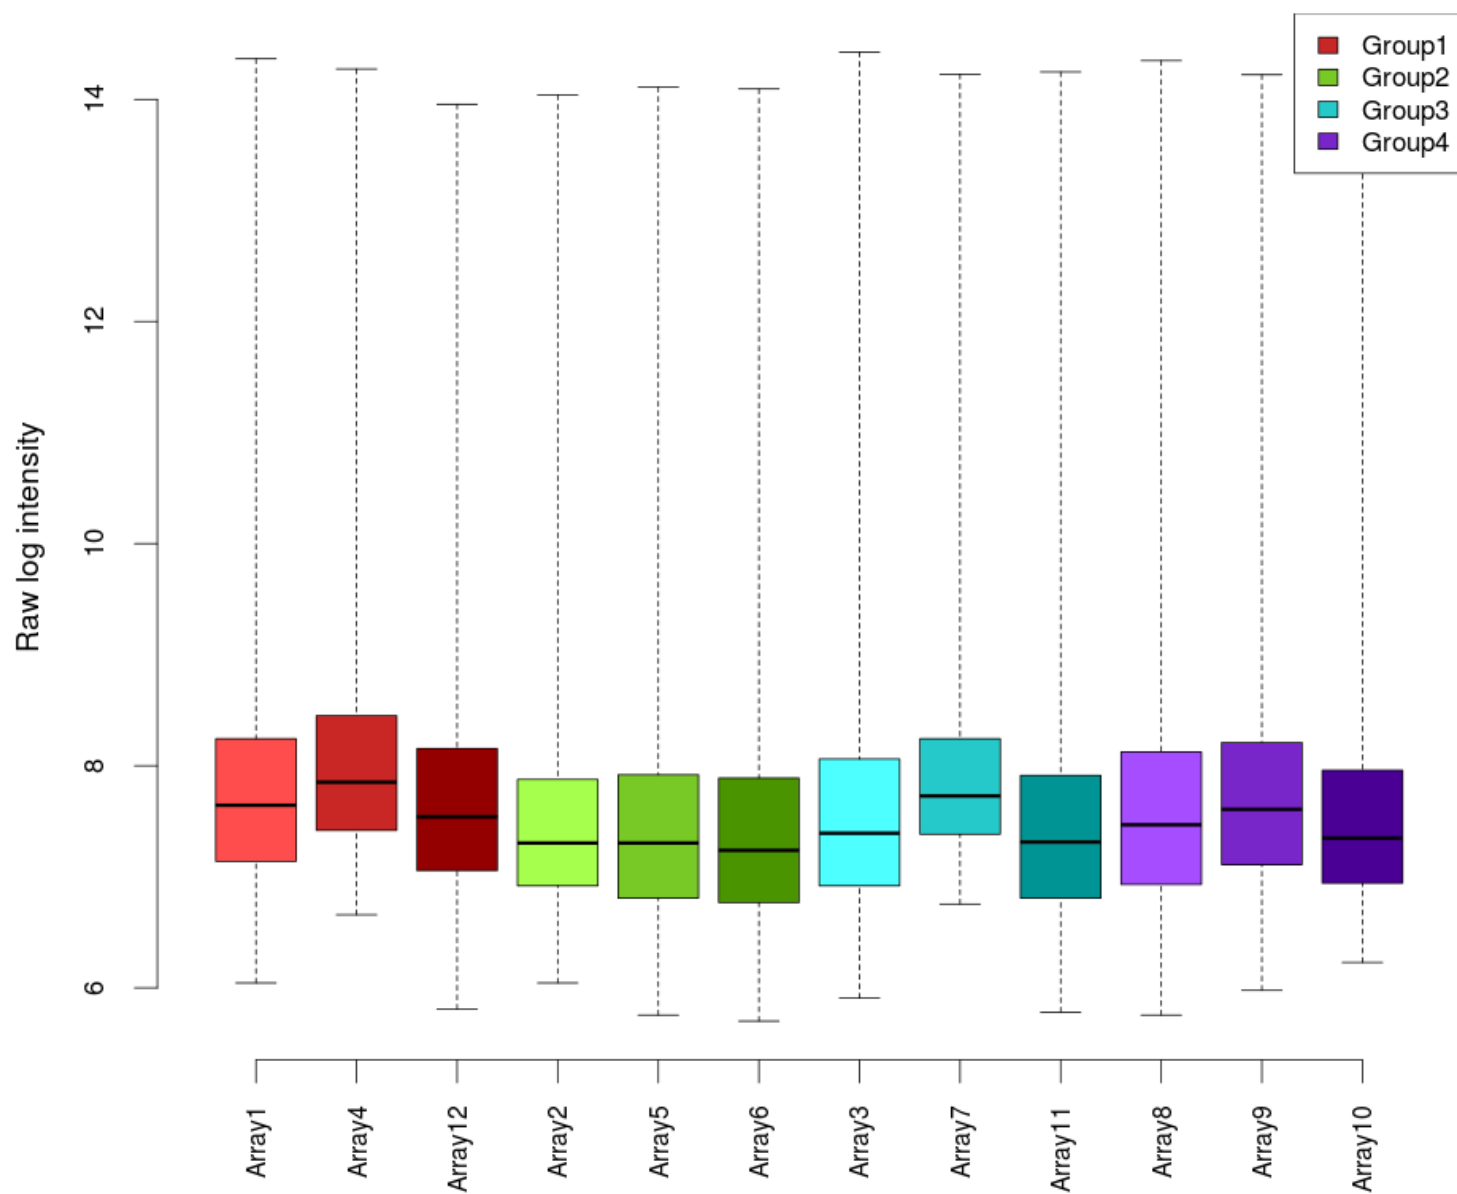

# Density histogram of raw intensities

Curves should be comparable between arrays

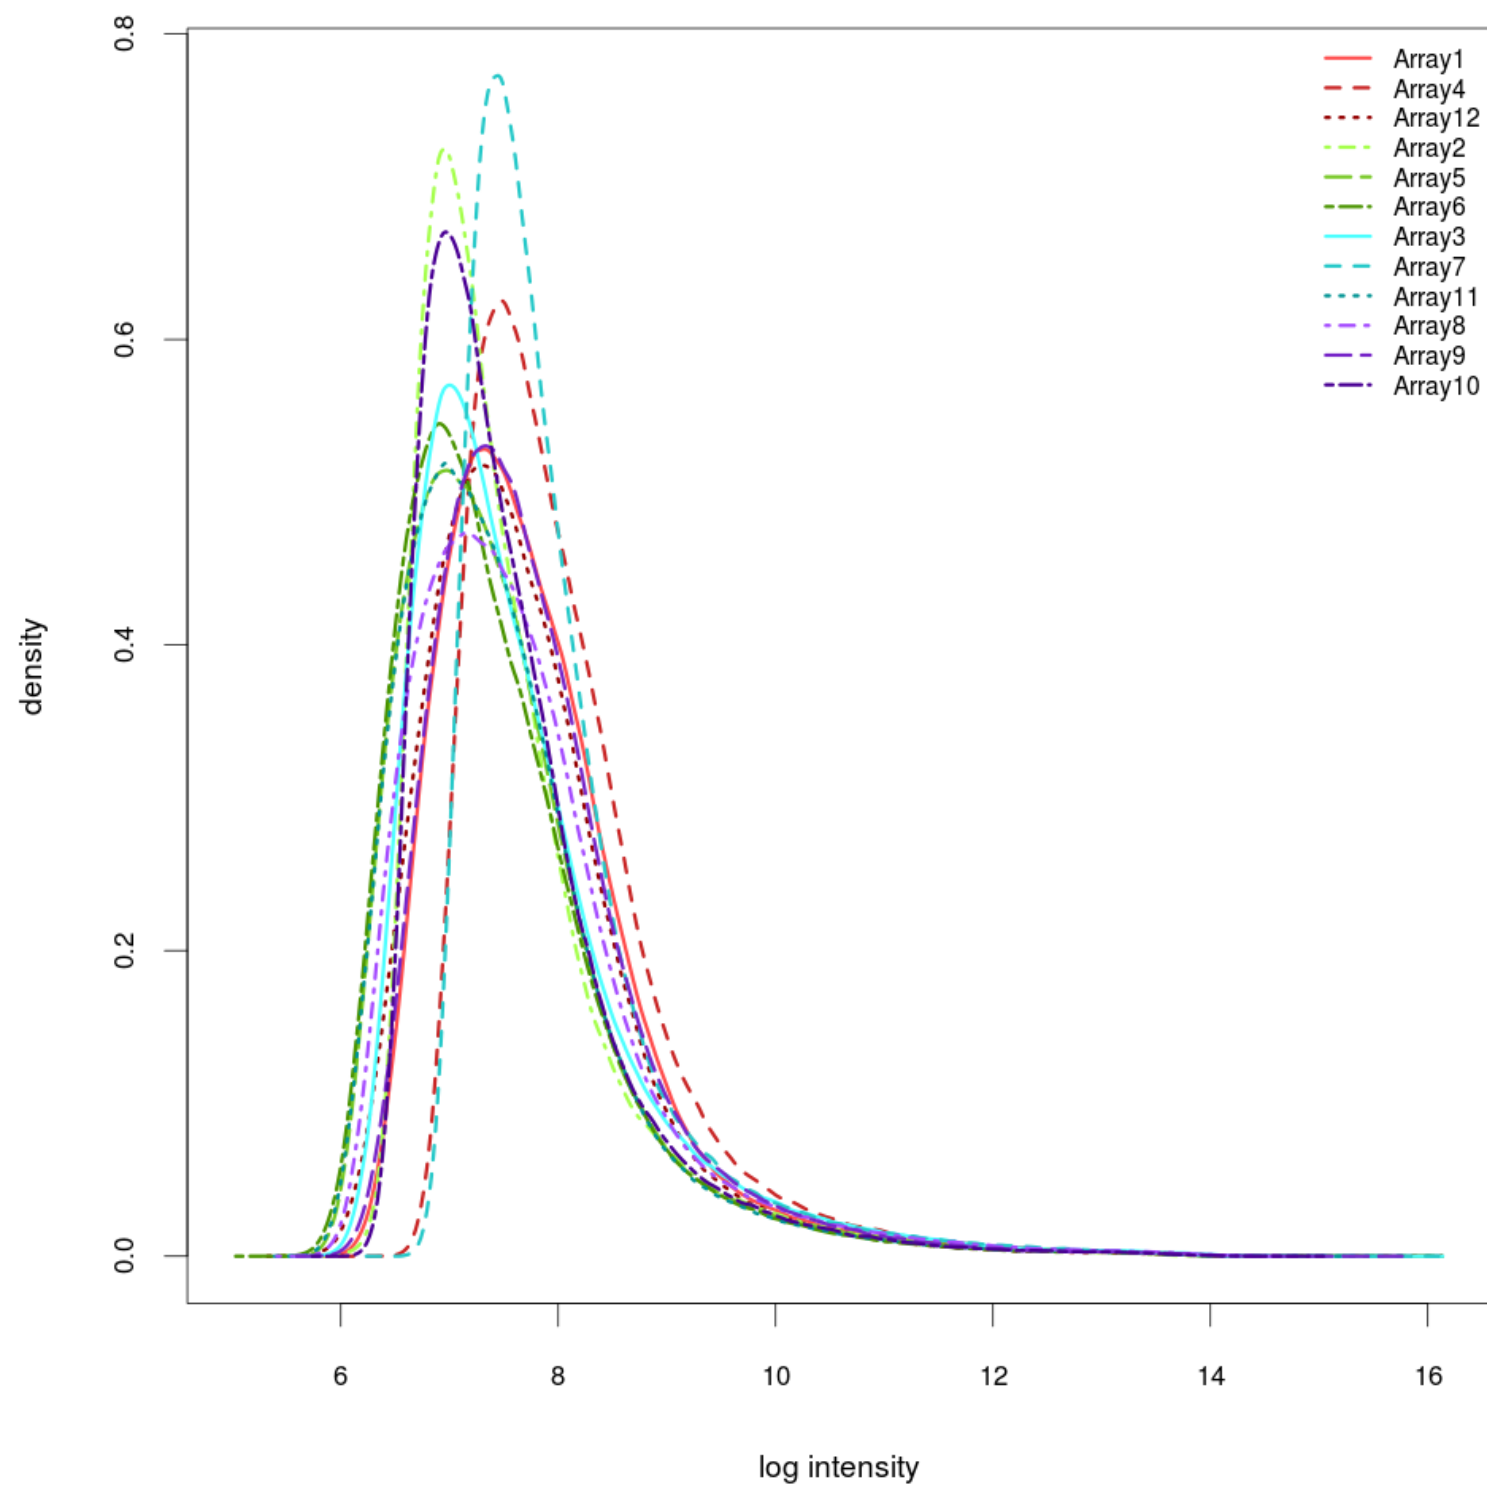

# MA plots of raw data 1 / 2

Array1 vs pseudo-median reference chip

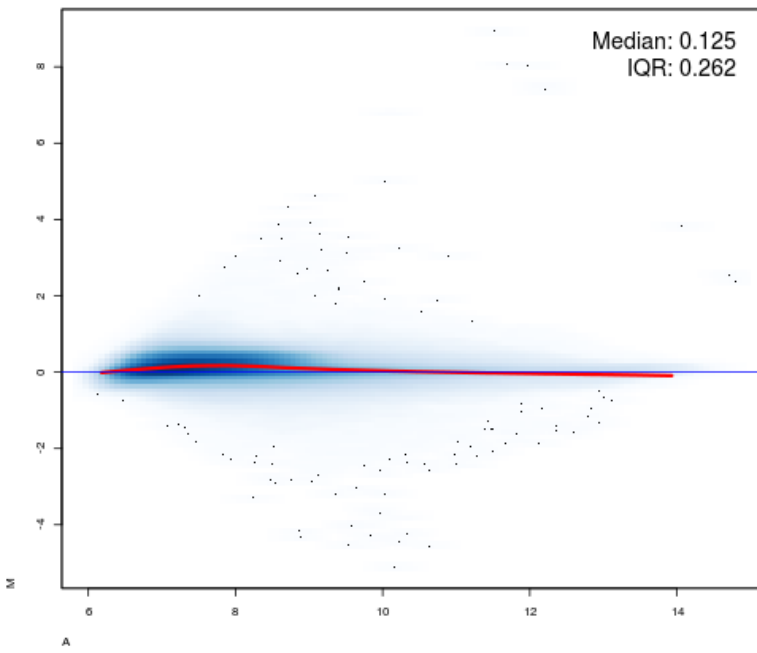

Array4 vs pseudo-median reference chip

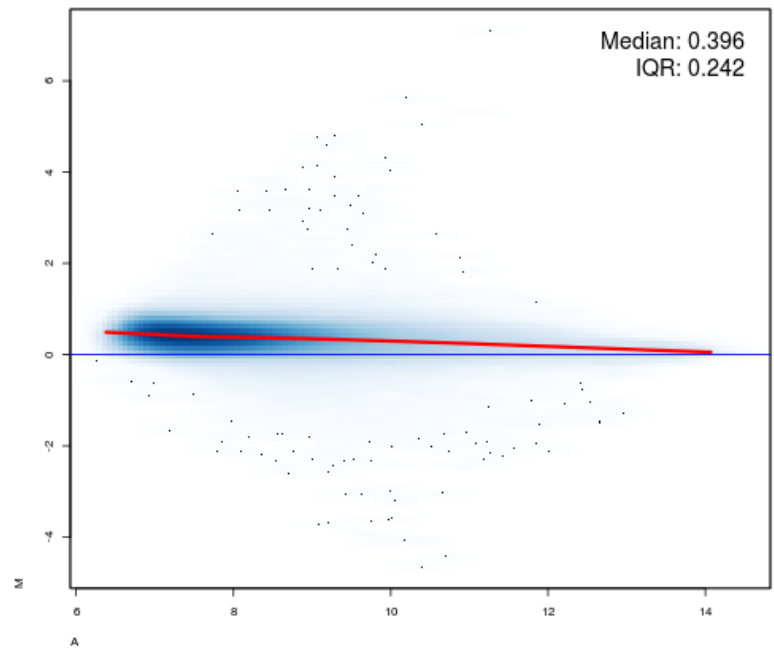

Array12 vs pseudo-median reference chip

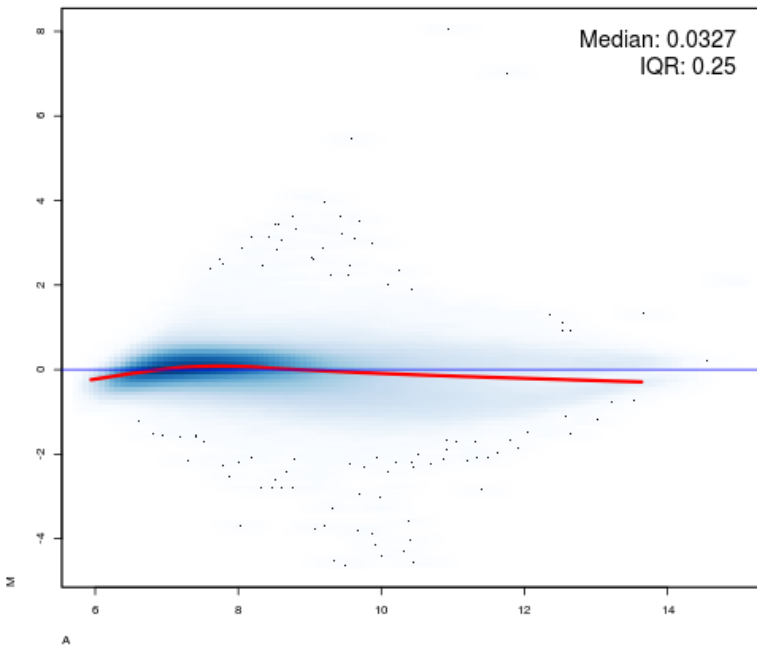

Array2 vs pseudo-median reference chip

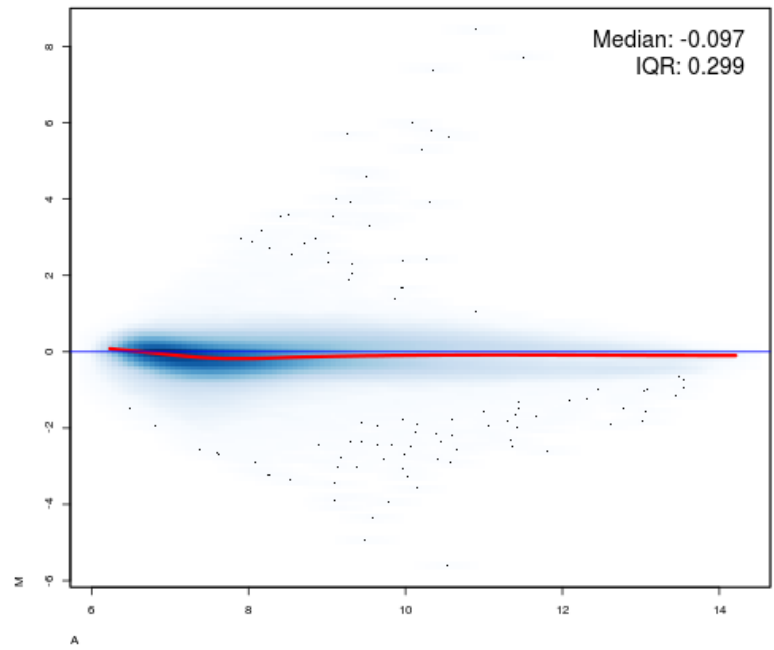

Array5 vs pseudo-median reference chip

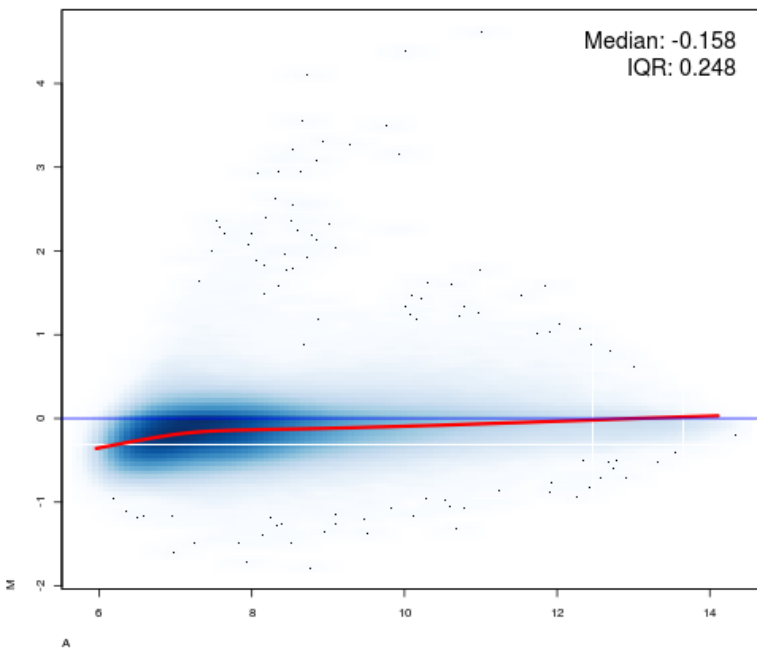

Array6 vs pseudo-median reference chip

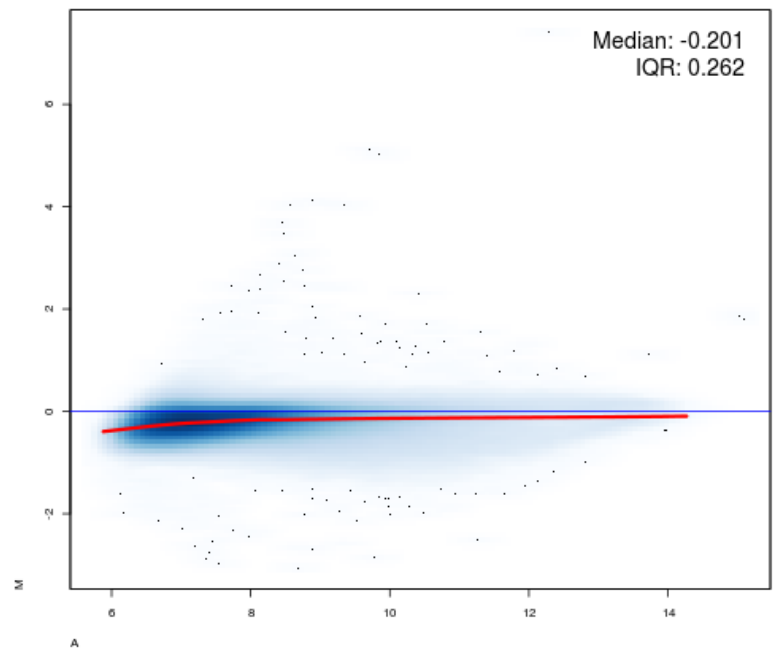

## MA plots of raw data 2 / 2

Array3 vs pseudo-median reference chip

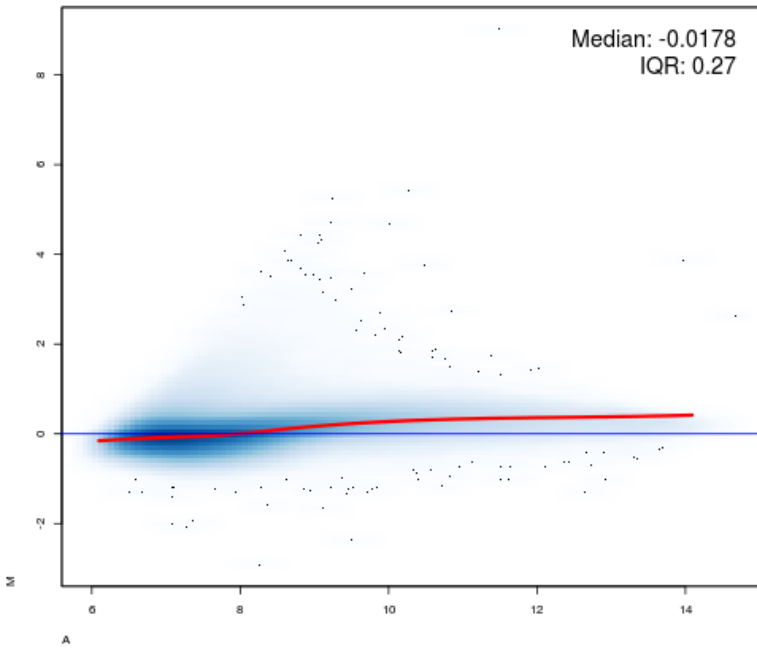

Array7 vs pseudo-median reference chip

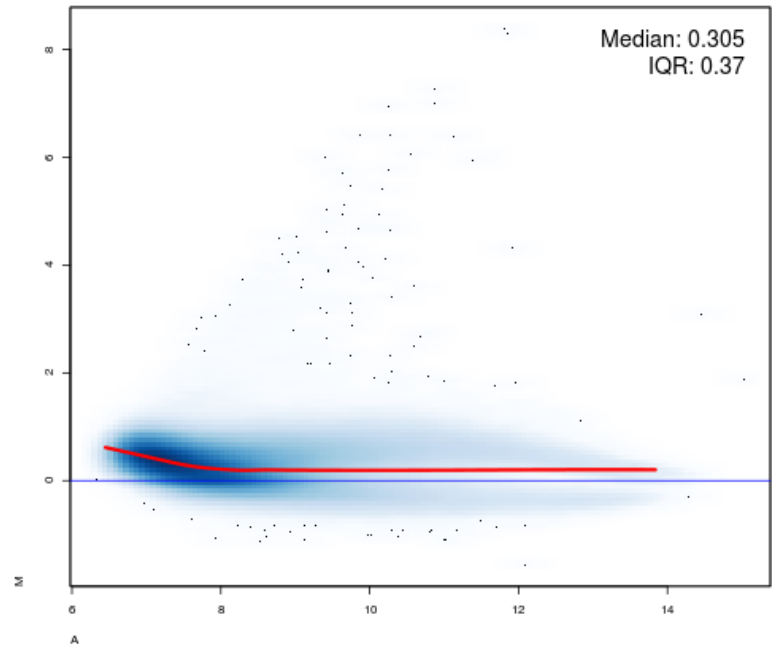

Array11 vs pseudo-median reference chip

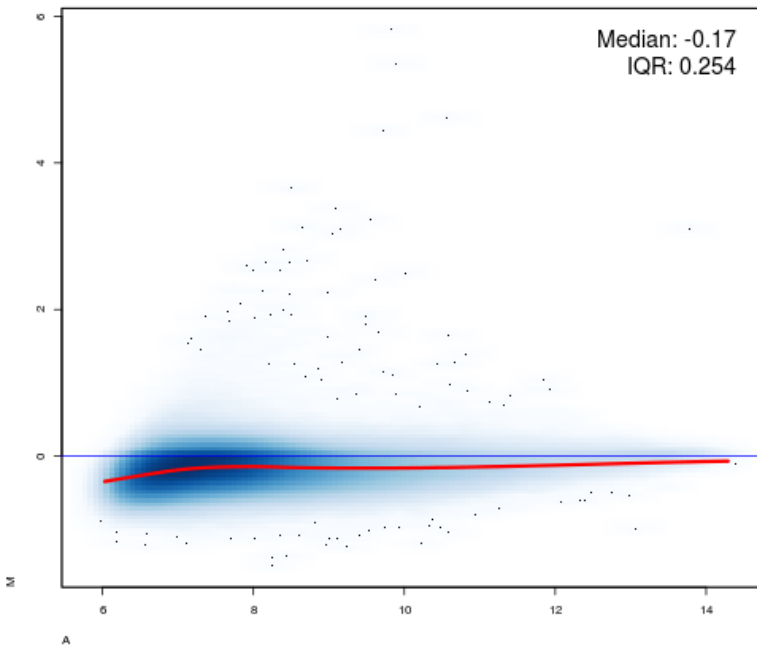

Array8 vs pseudo-median reference chip

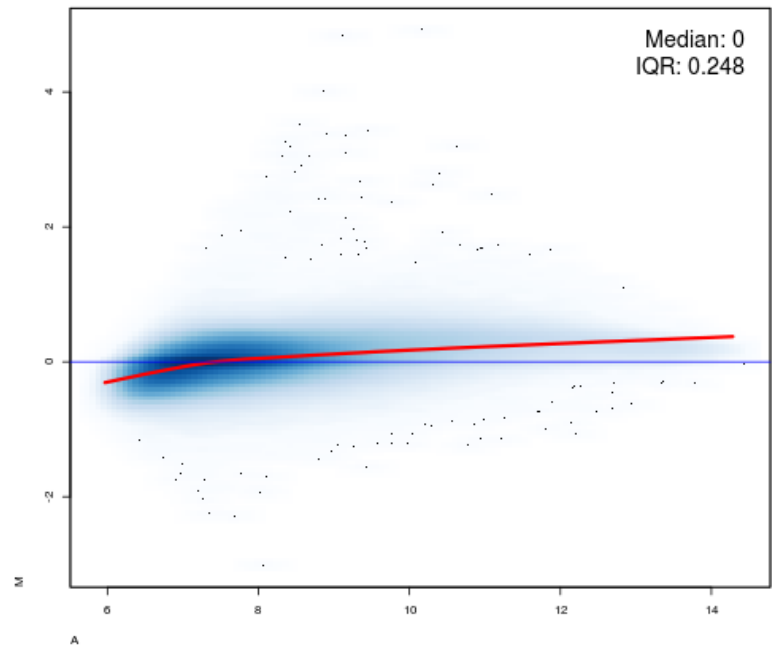

Array9 vs pseudo-median reference chip

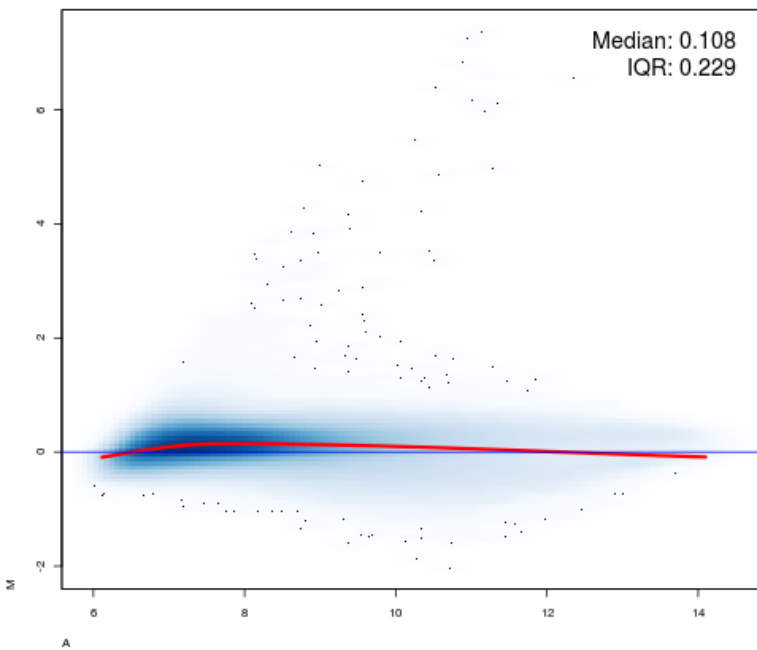

Array10 vs pseudo-median reference chip

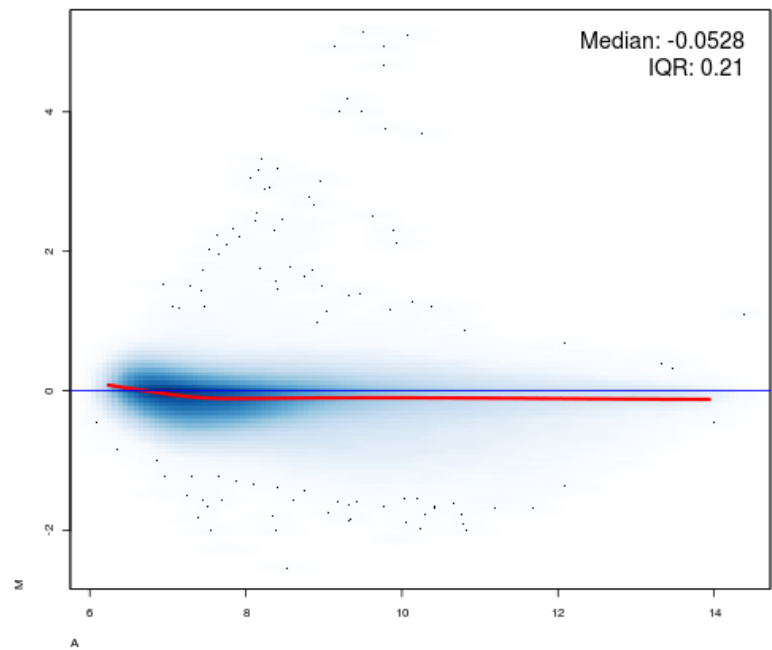



## 2D virtual PLM image for model characteristic: resid 1 / 2

**Array1**

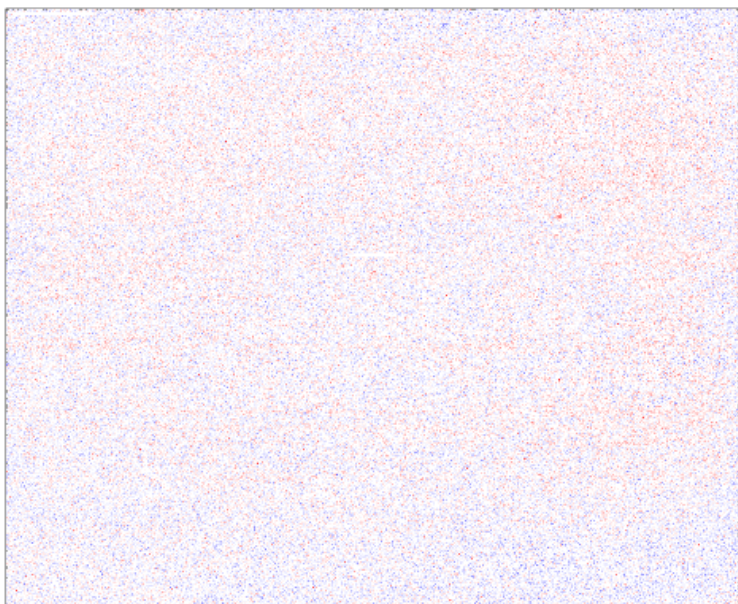

**Array4**

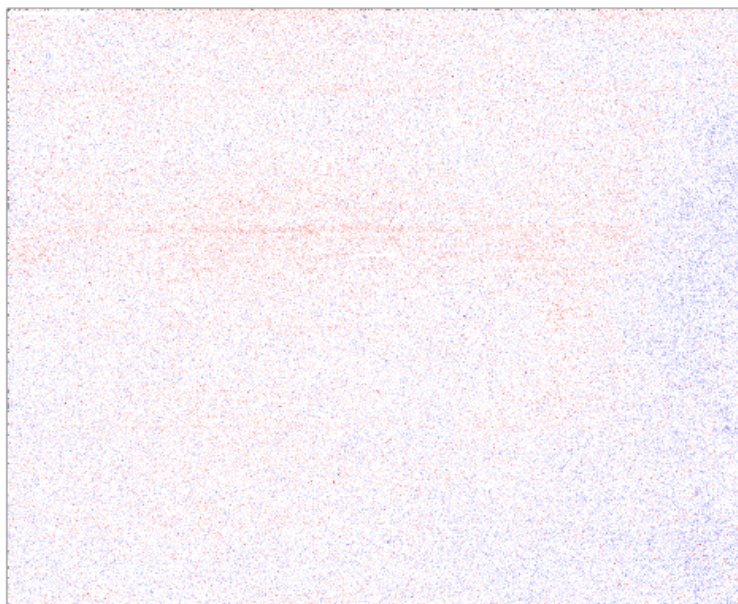

**Array12**

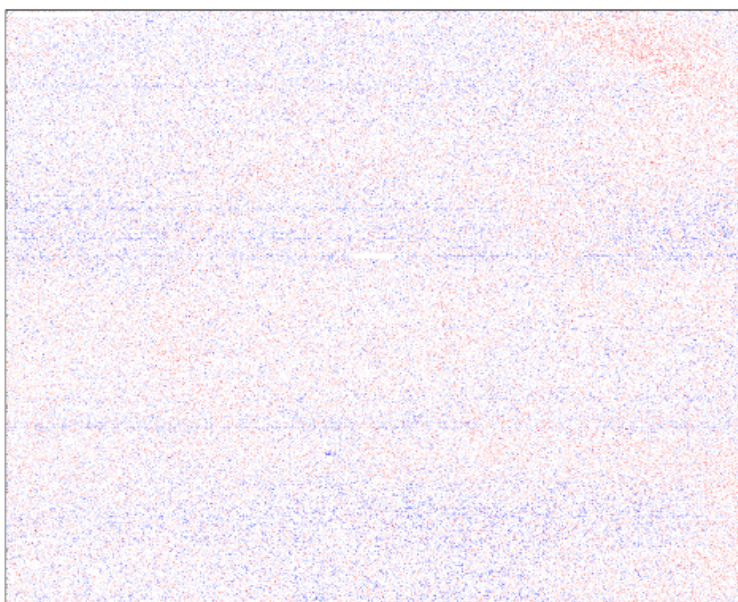

**Array2**

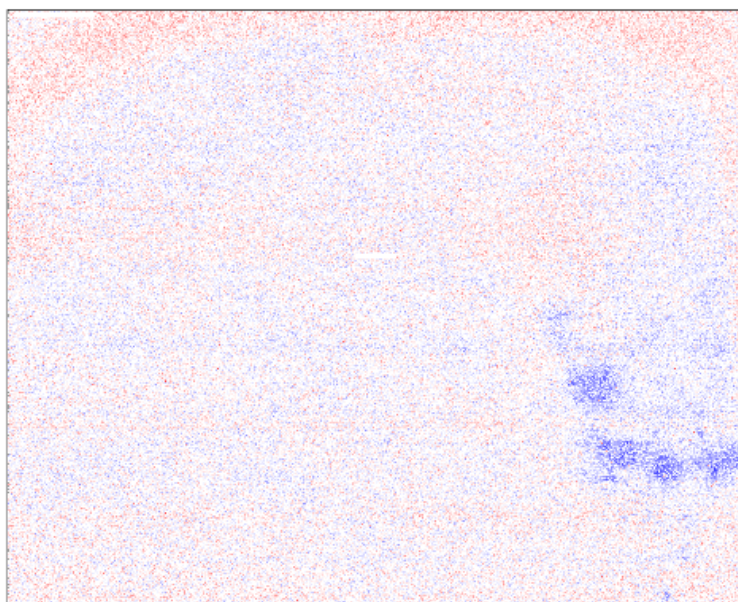

**Array5**

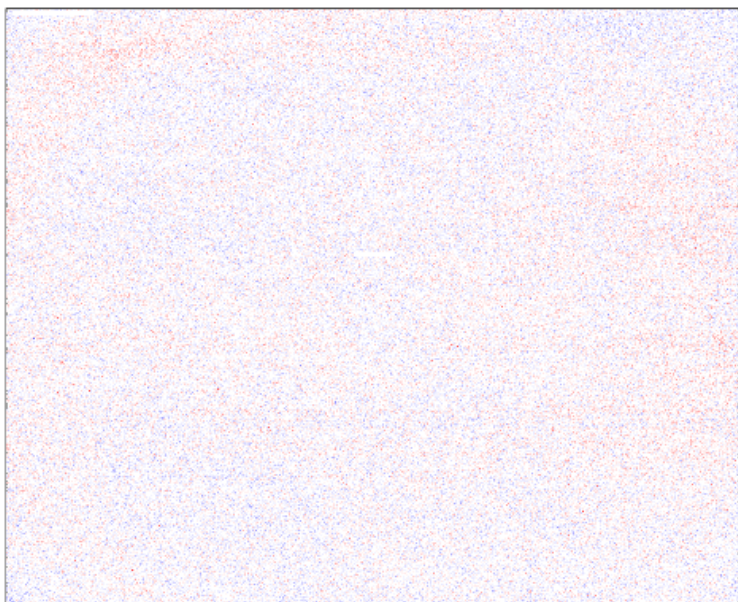

**Array6**

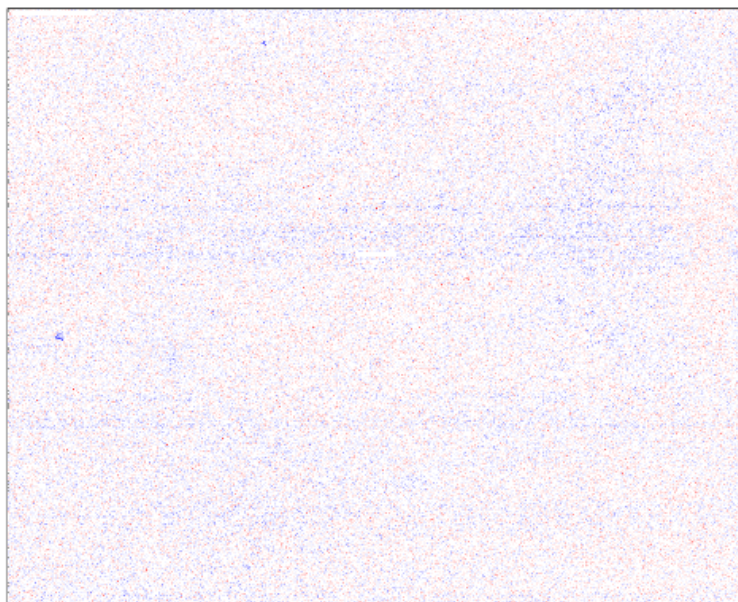



## 2D virtual PLM image for model characteristic: resids 2 / 2

**Array3**

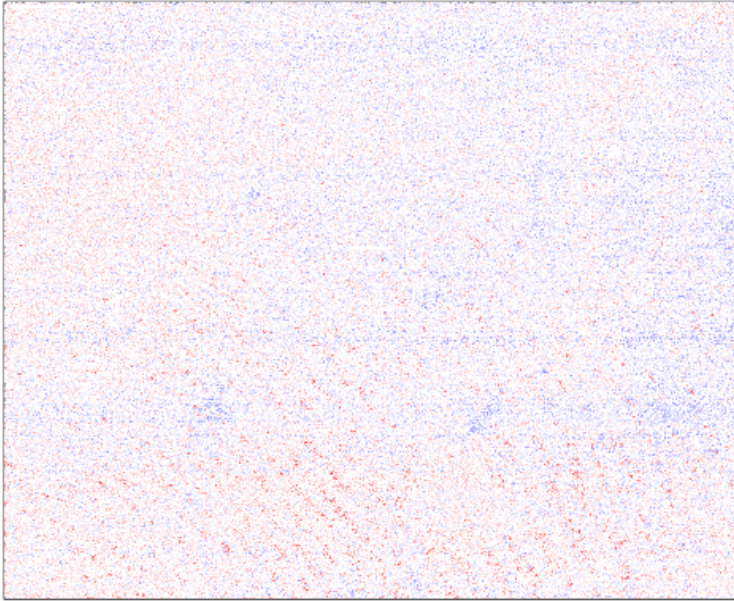

**Array7**

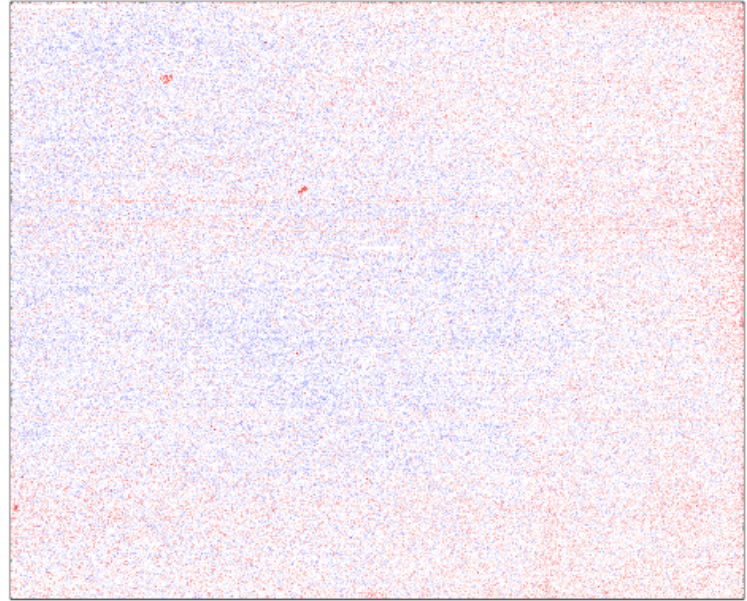

**Array11**

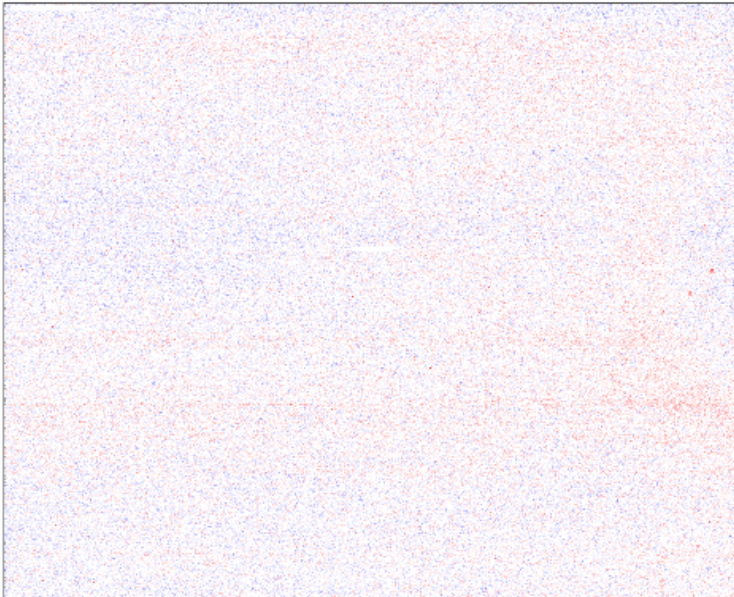

**Array8**

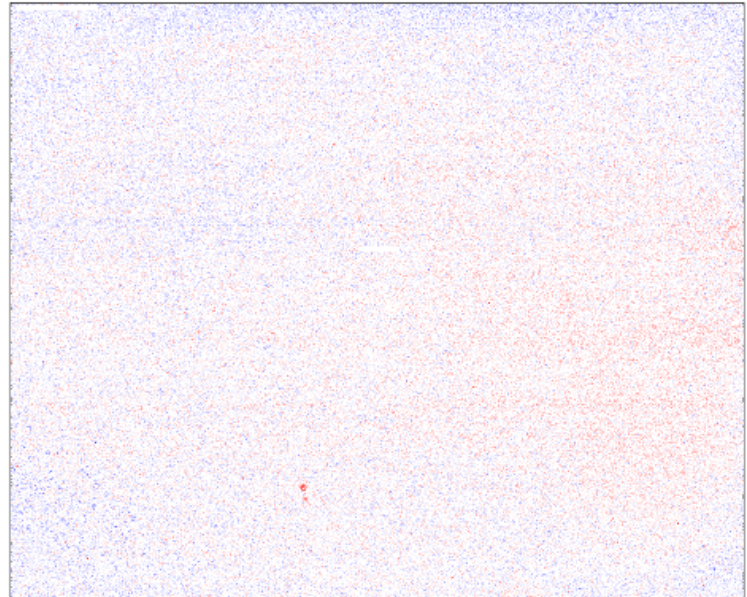

**Array9**

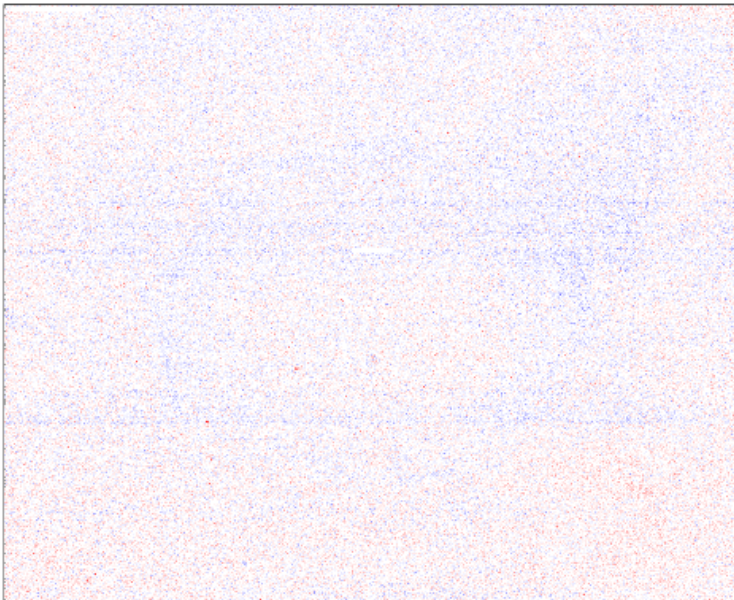

**Array10**

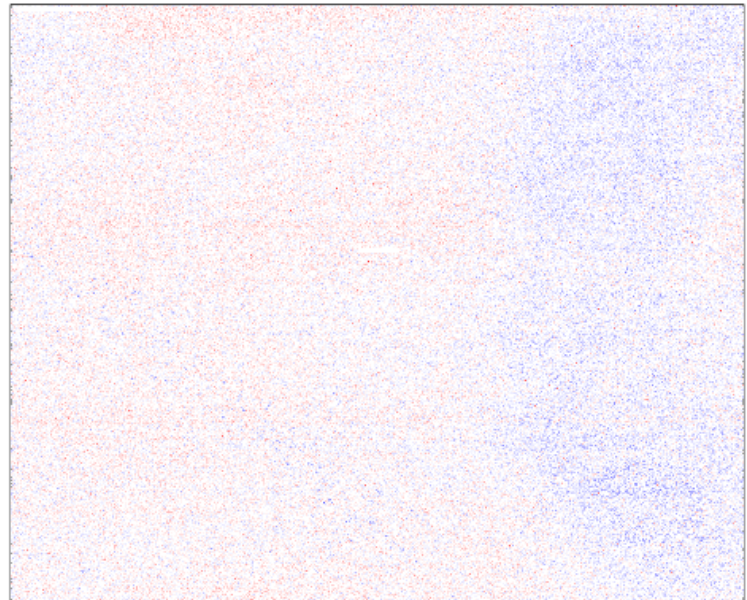



# Normalized Unscaled Standard Errors (NUSE)

NUSE median value should be < 1.1

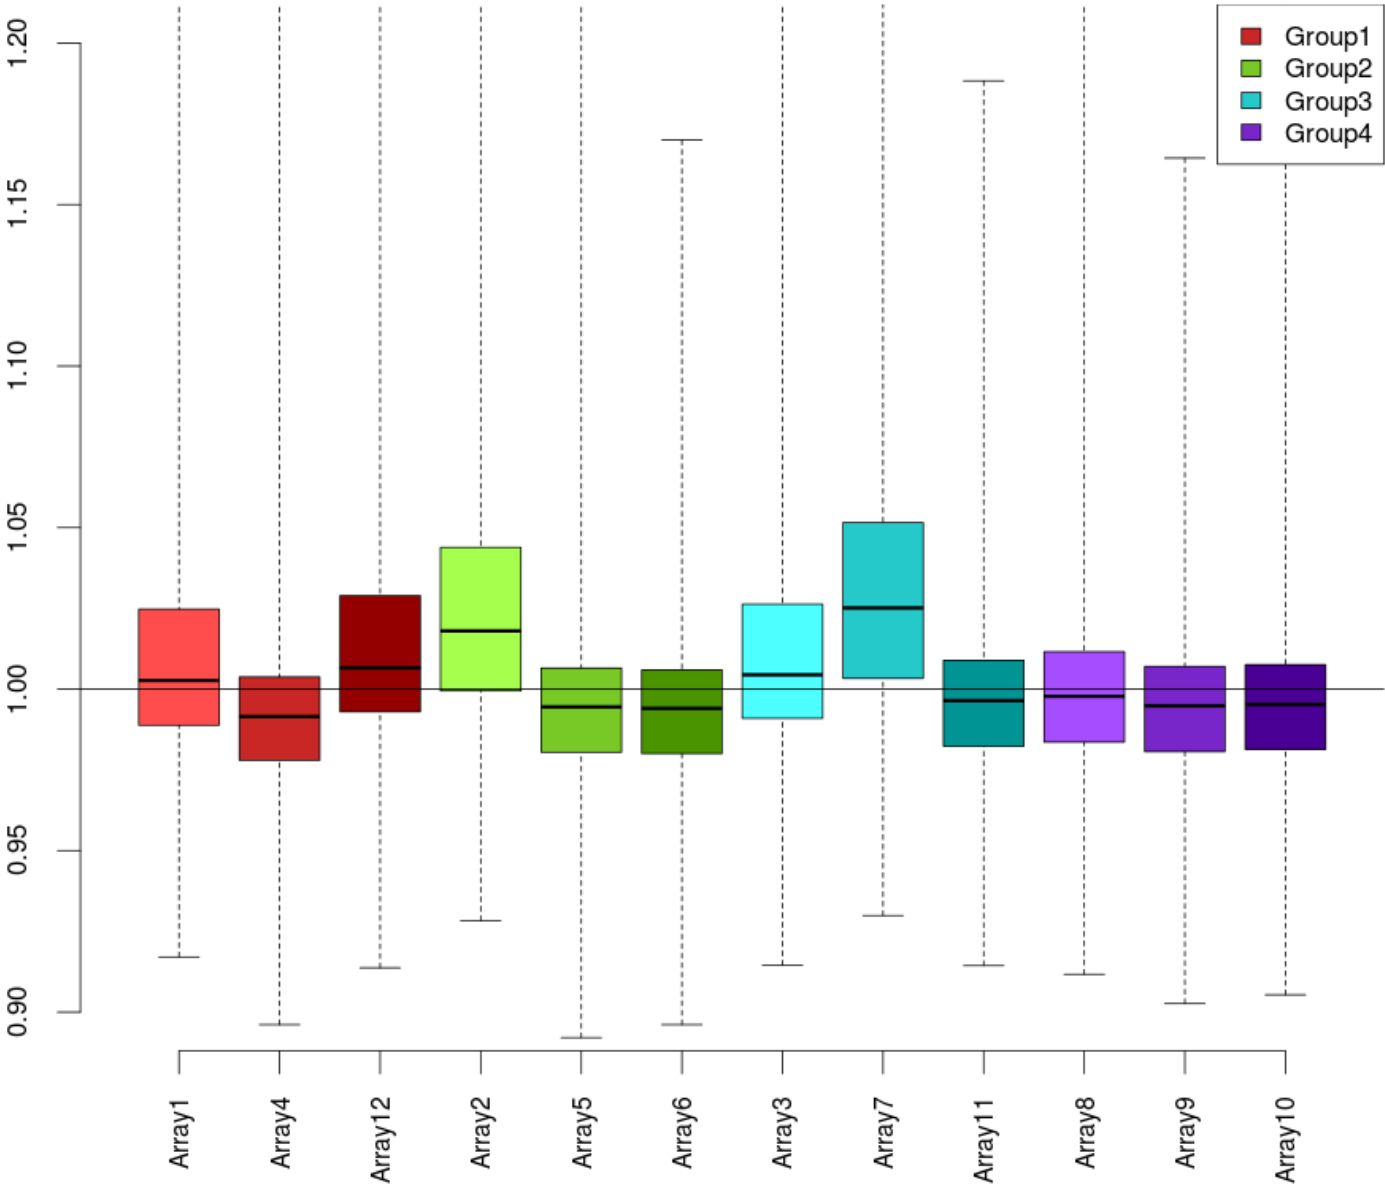

# Relative Log Expression (RLE)

RLE distributions should be centered around 0

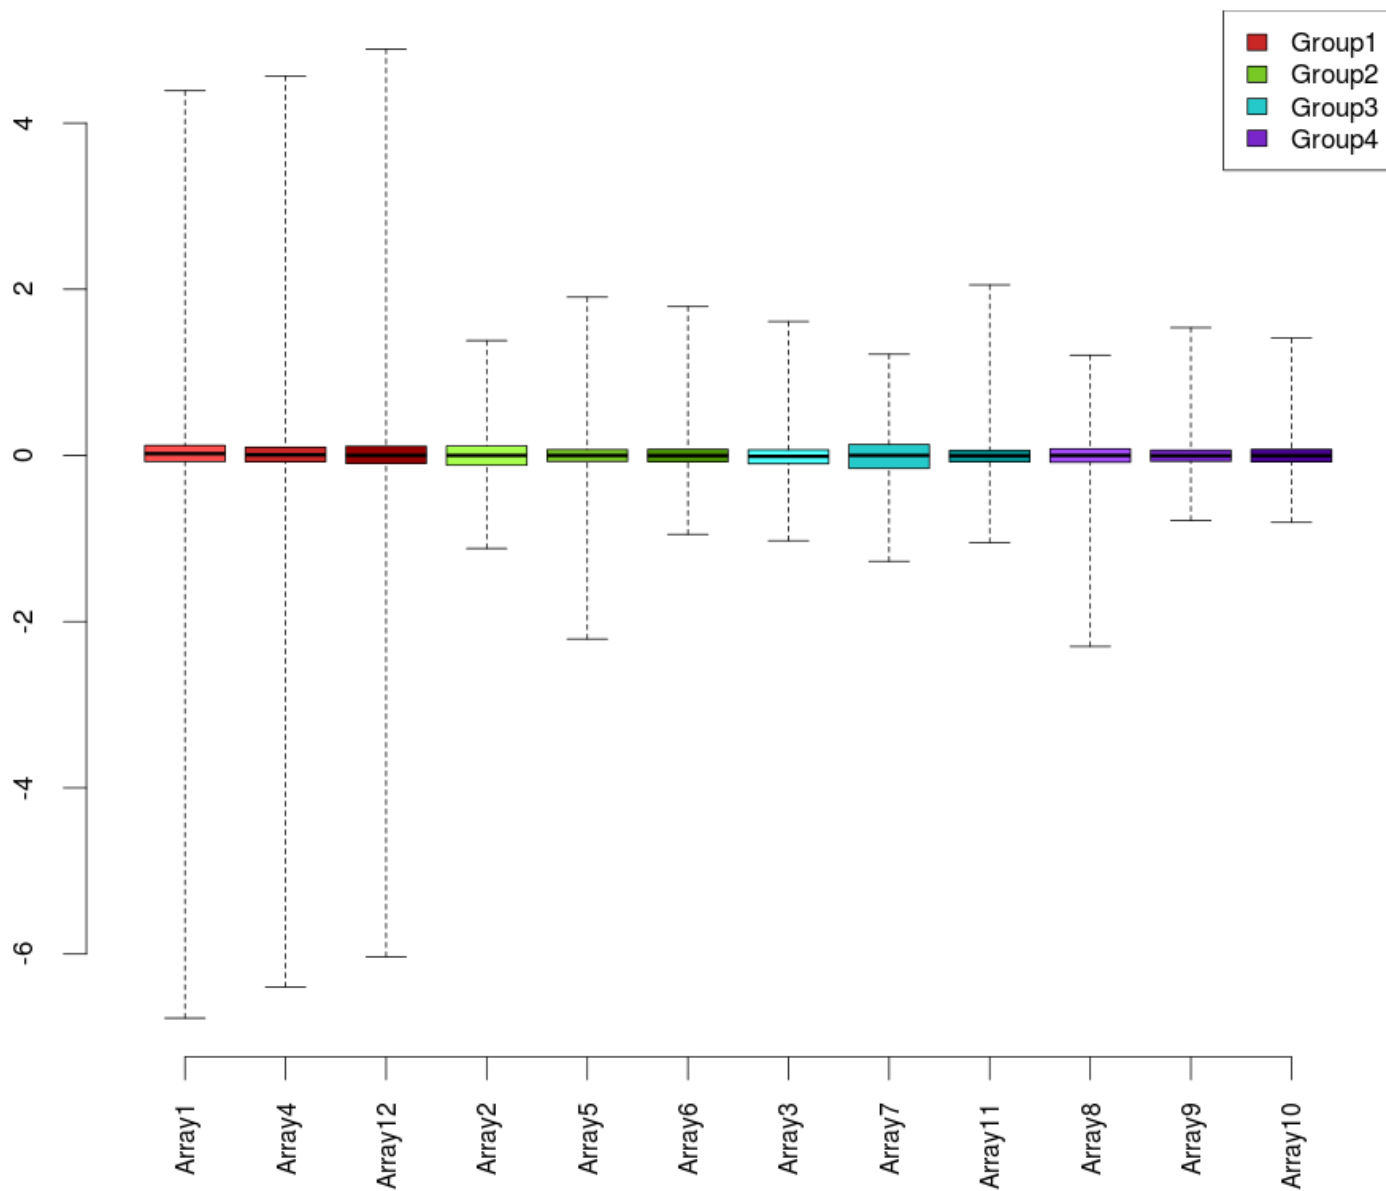

Color Key  
and Density Plot

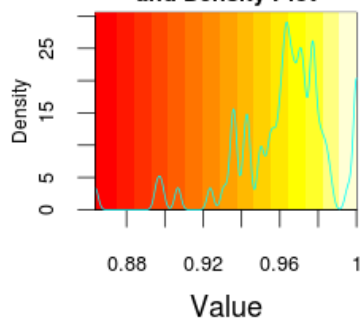

Raw data correlation plot  
correlation method: pearson  
cluster method: ward

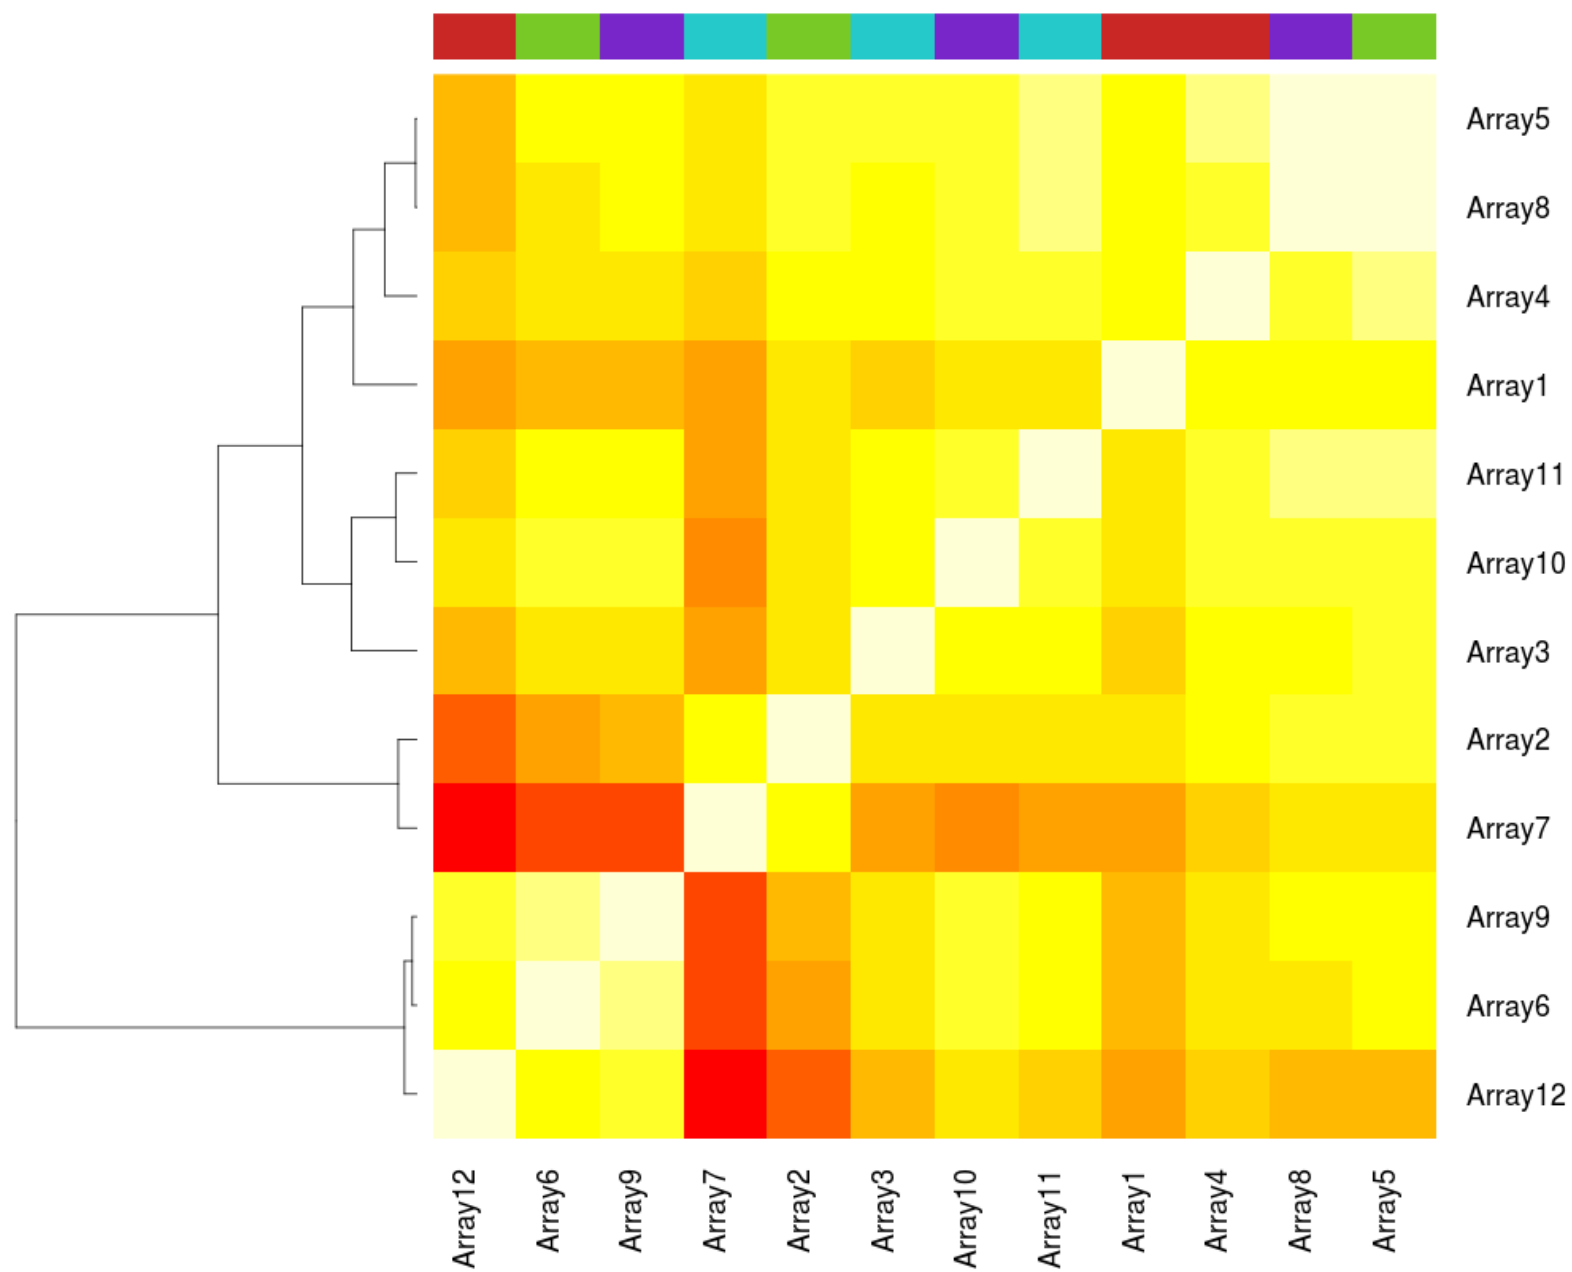

# PCA analysis of Raw data

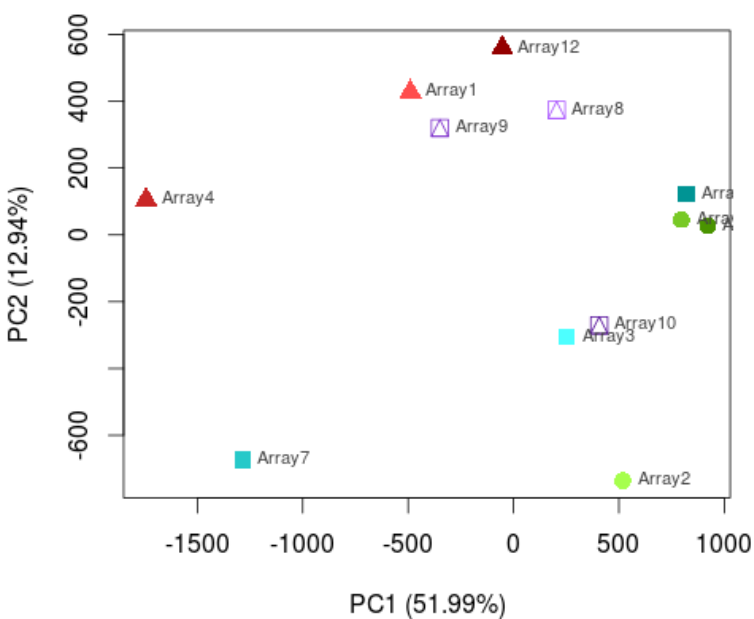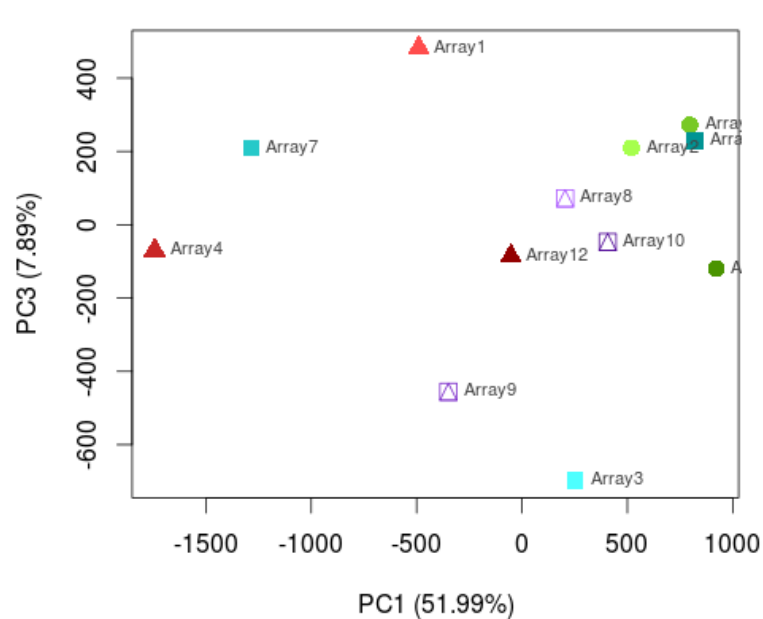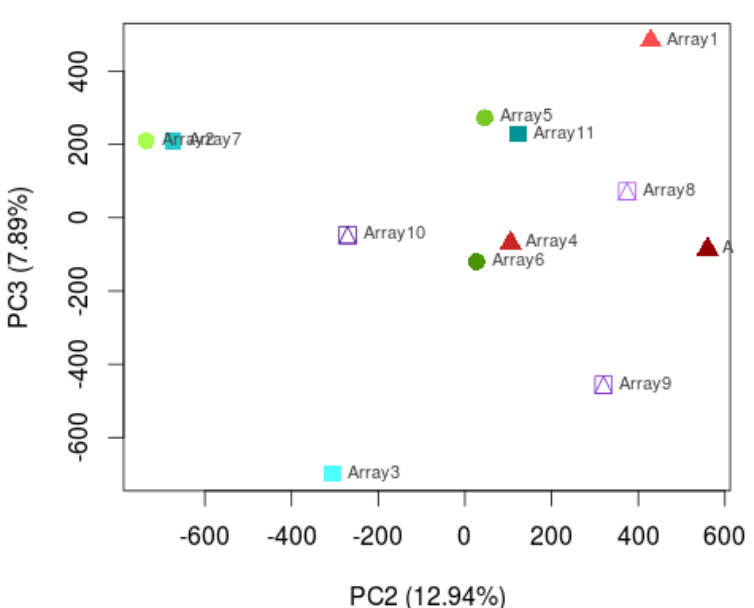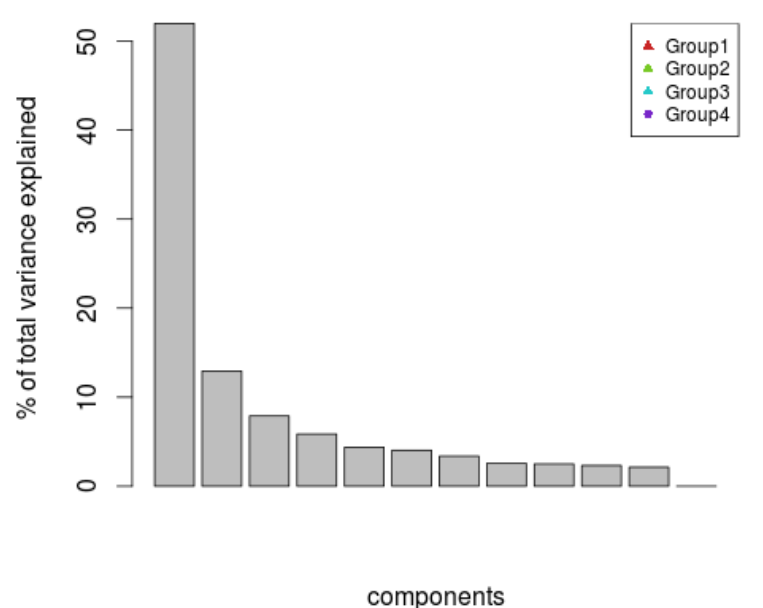

Cluster dendrogram of raw data

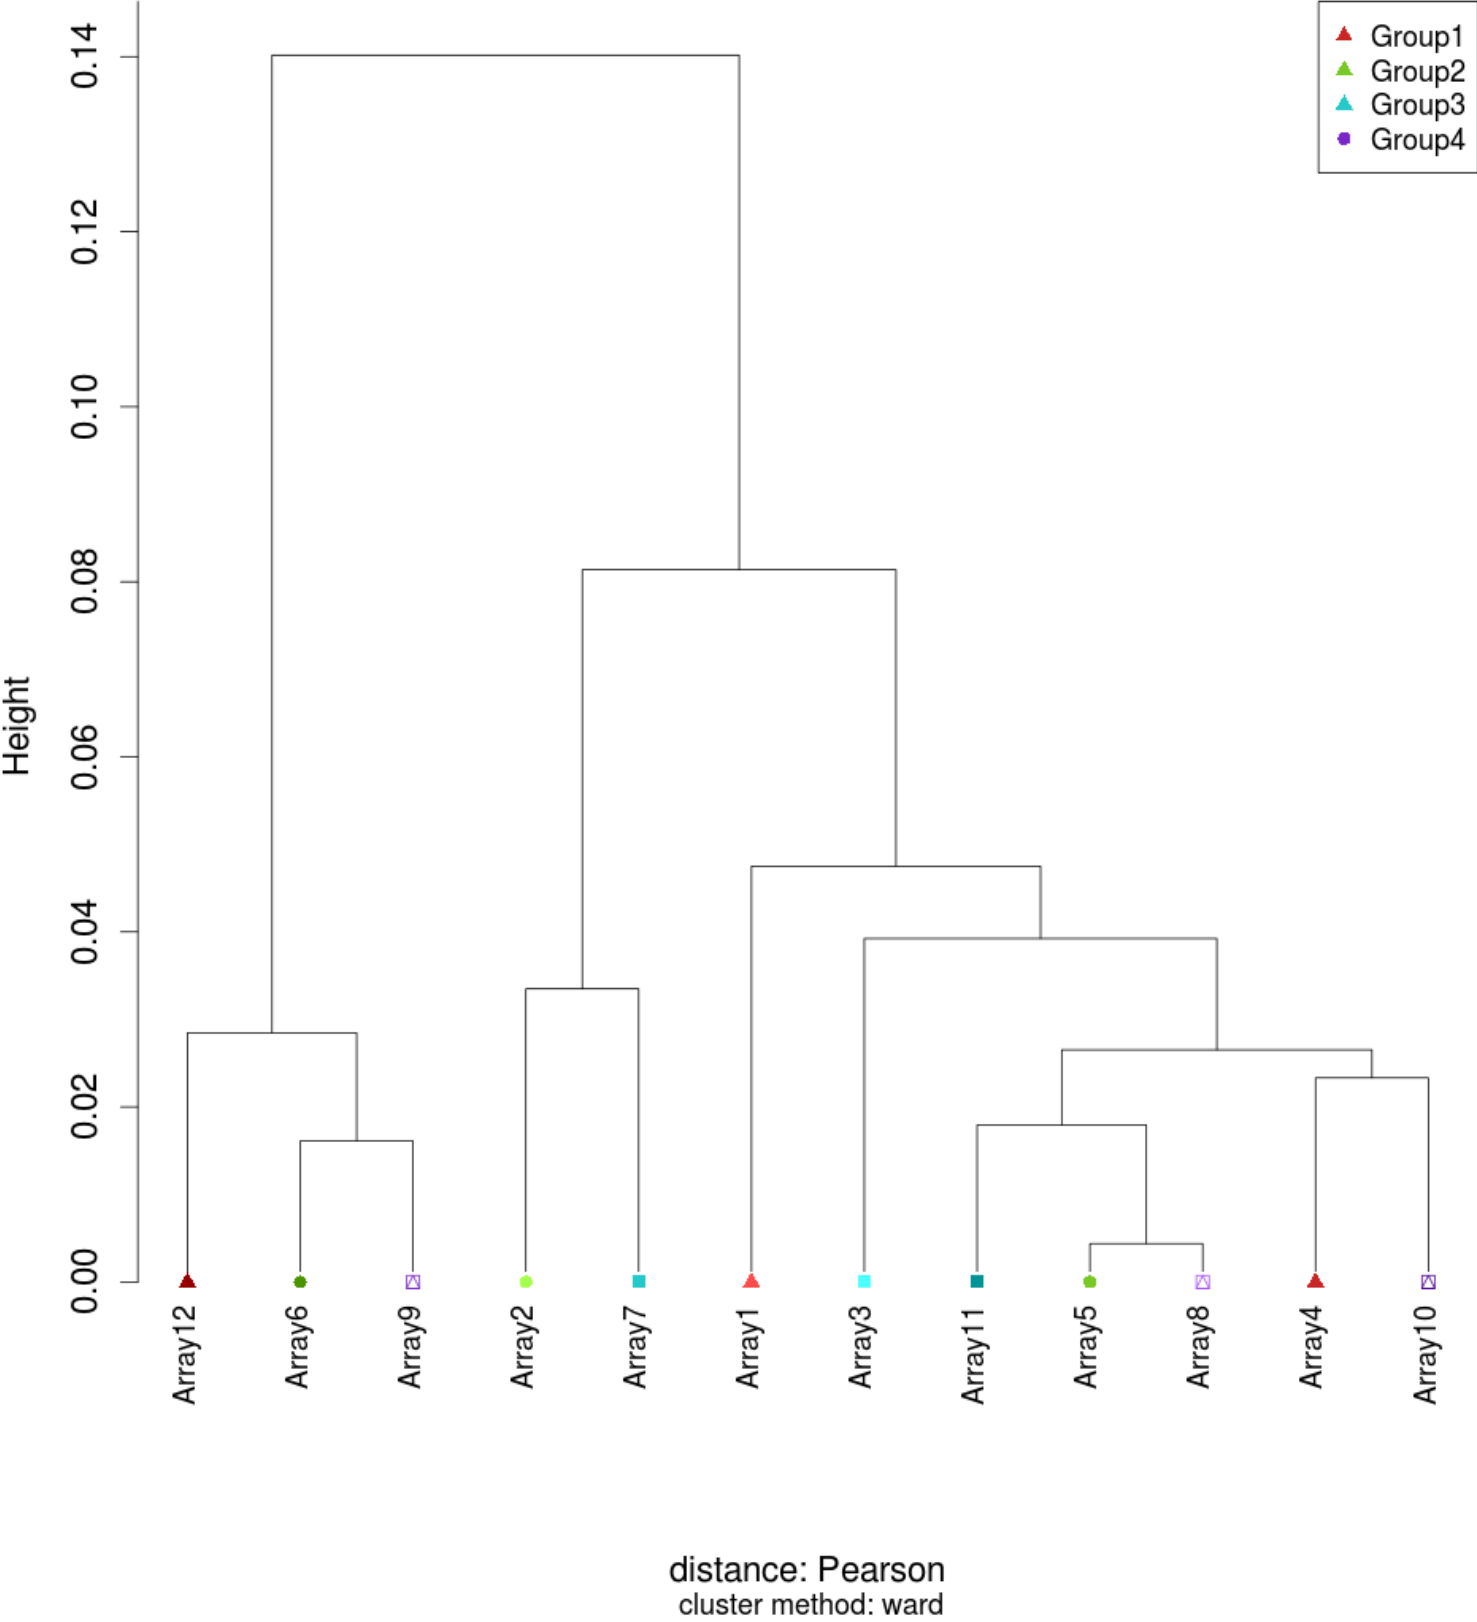

## Pre-processing of Raw Data

Method: GCRMA

Annotation: hgu133plus2\_Hs\_ENSG



# Boxplot after GCRMA

Distributions should be comparable between arrays

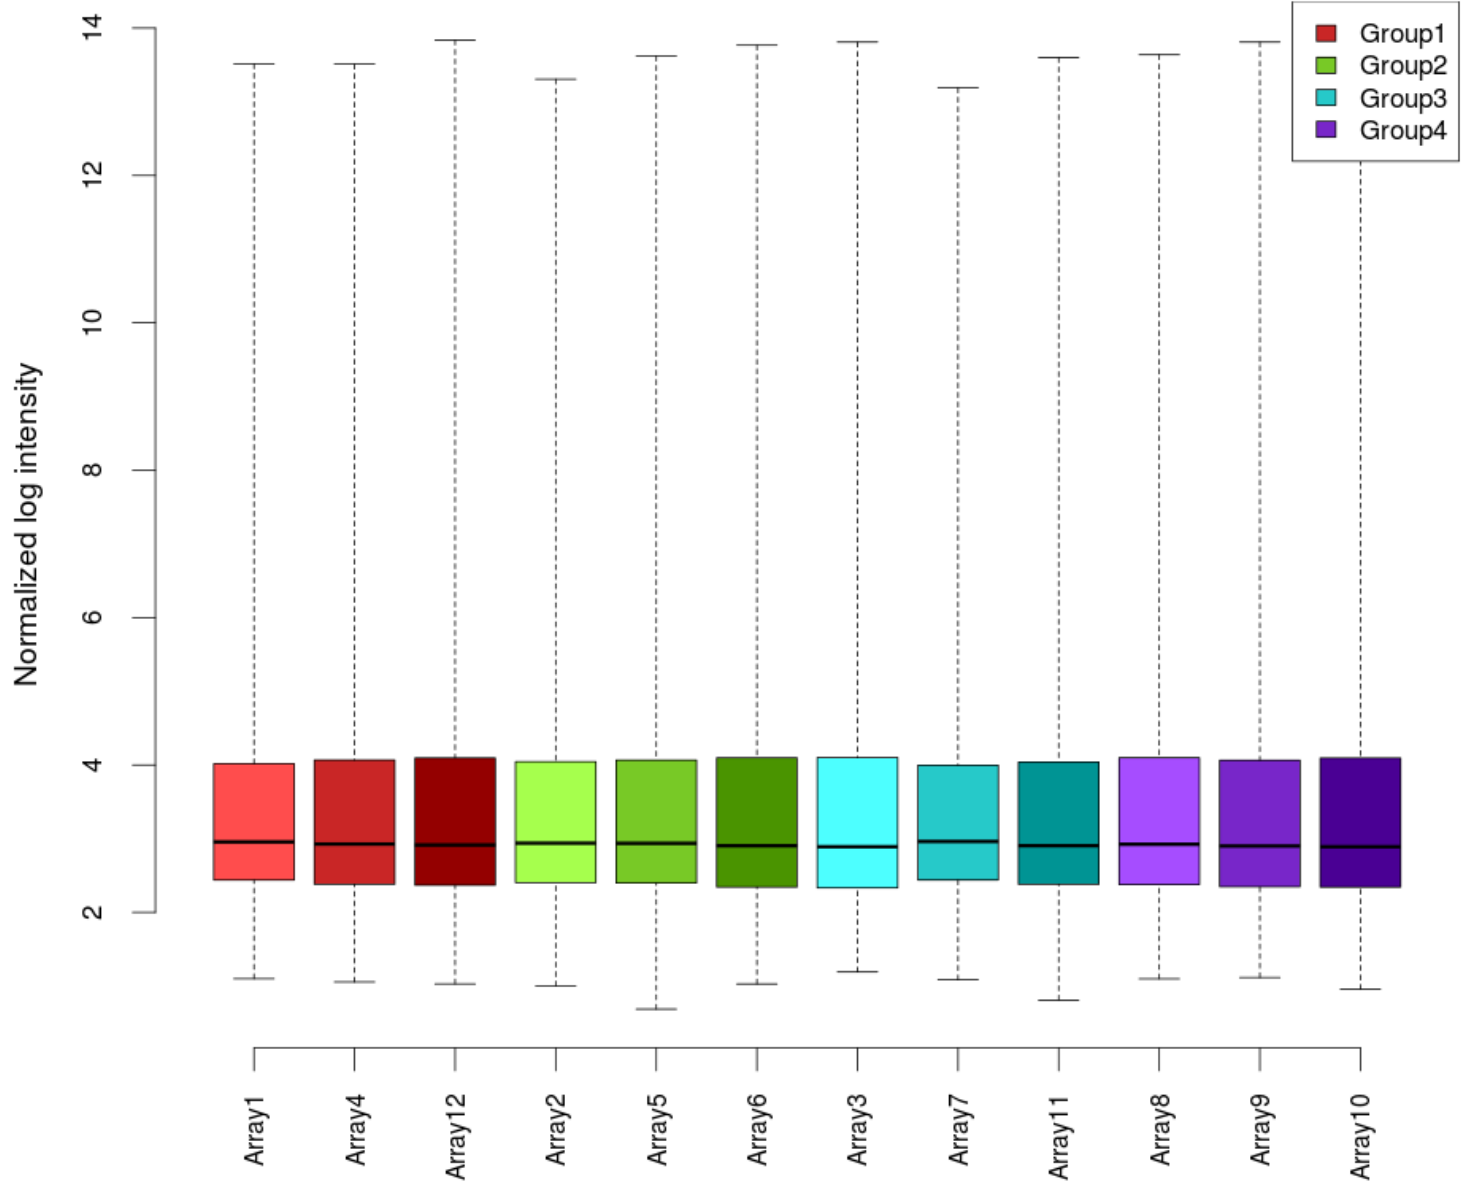

# Density histogram after GCRMA

Curves should be comparable between arrays

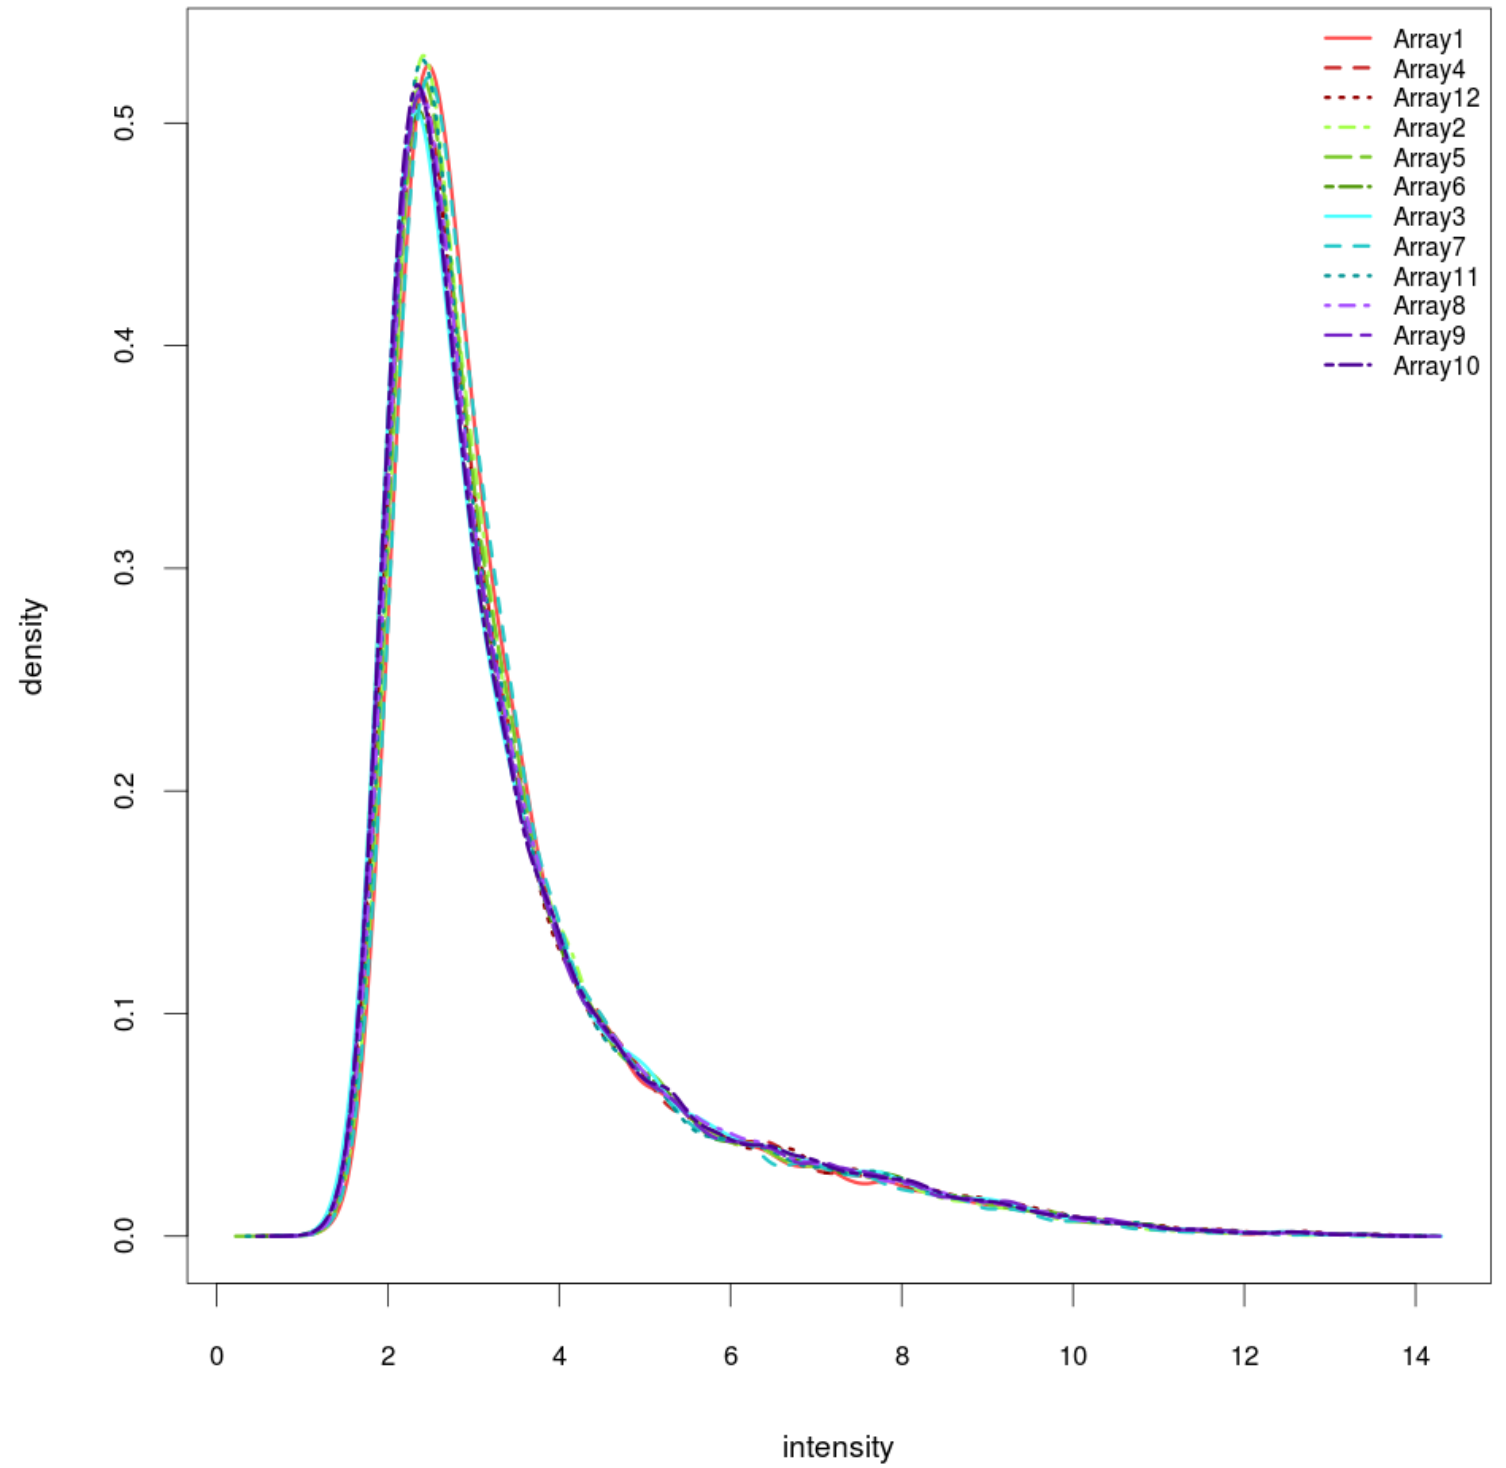

# MA plots after GCRMA normalization 1 / 2

Array1 vs pseudo-median reference chip

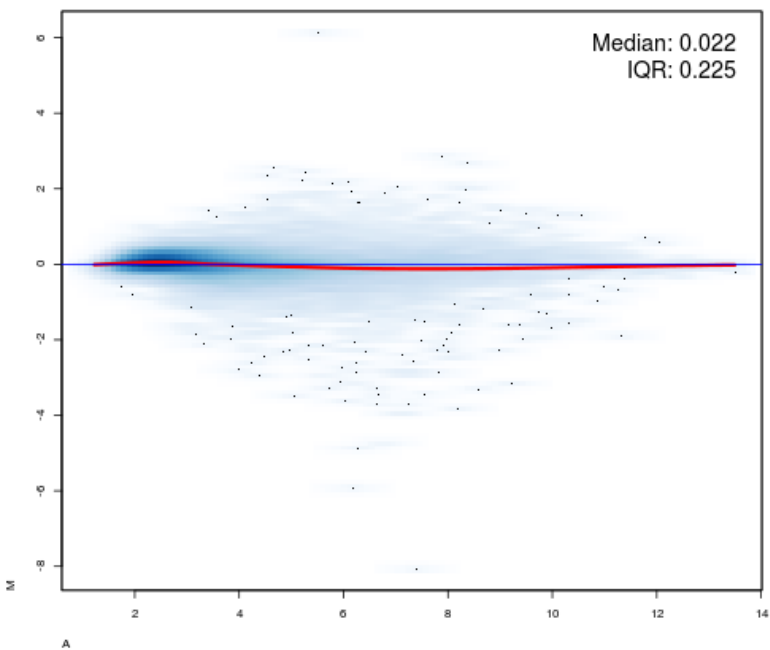

Array4 vs pseudo-median reference chip

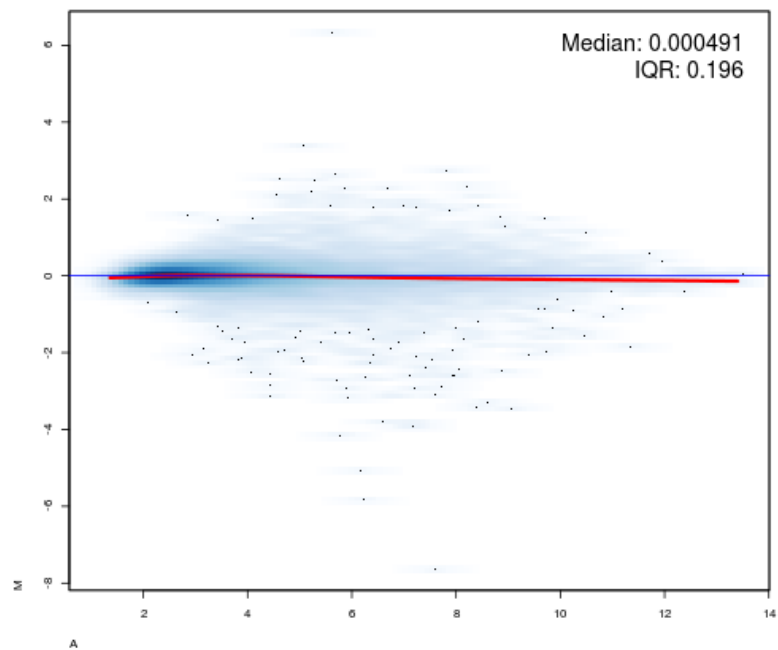

Array12 vs pseudo-median reference chip

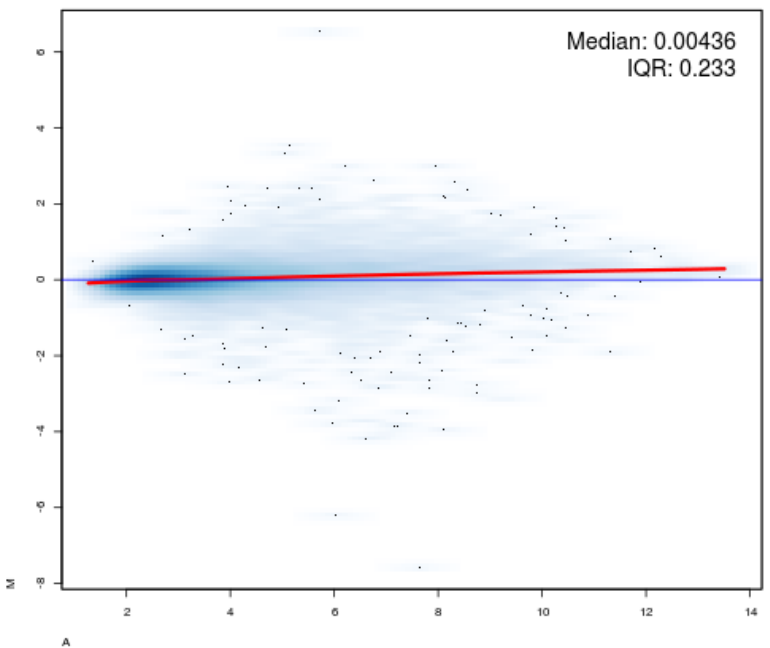

Array2 vs pseudo-median reference chip

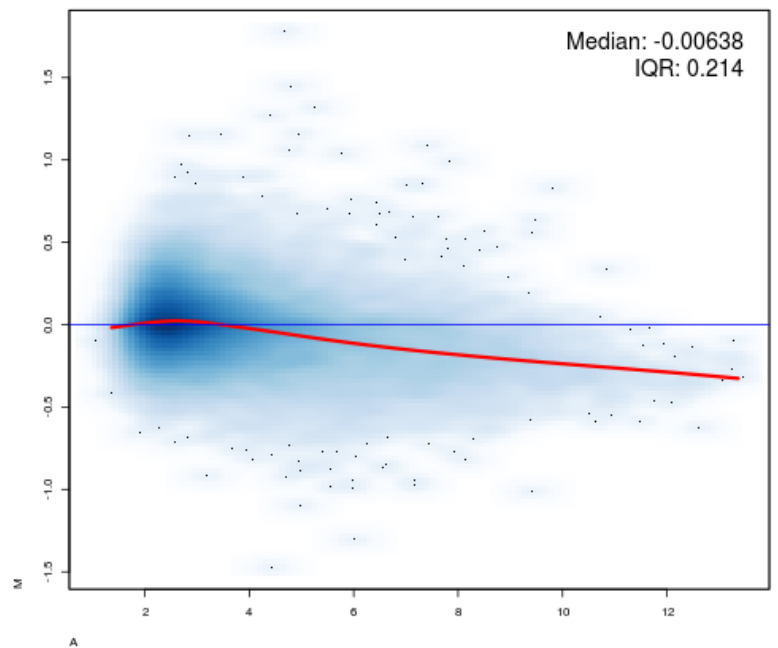

Array5 vs pseudo-median reference chip

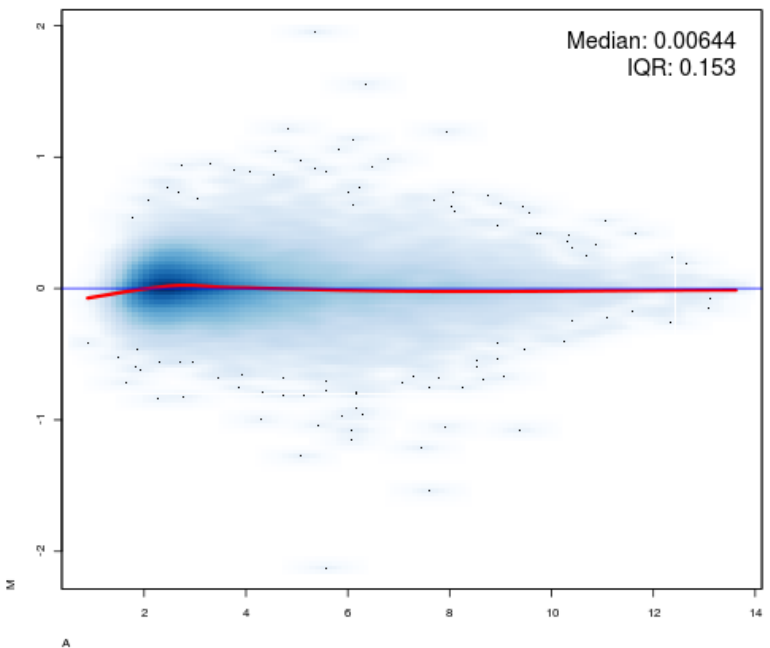

Array6 vs pseudo-median reference chip

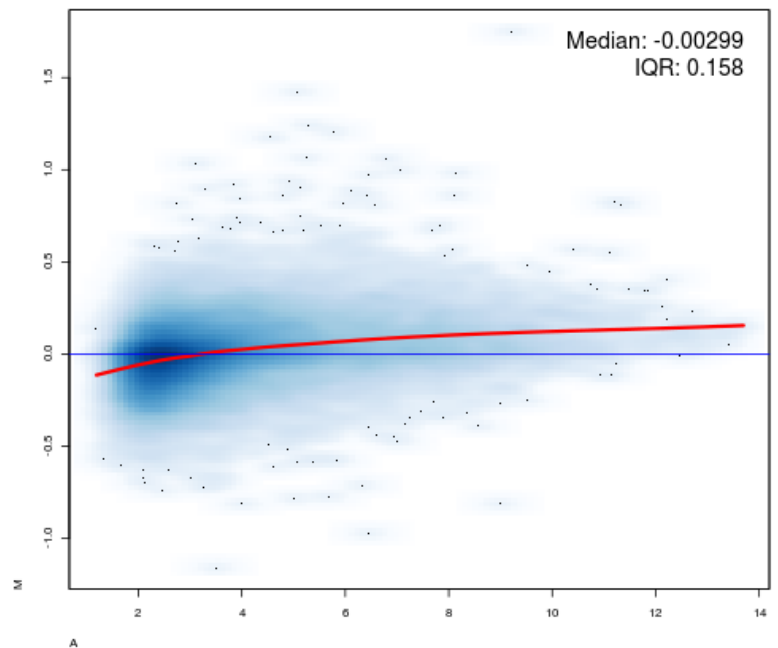

## MA plots after GCRMA normalization 2 / 2

Array3 vs pseudo-median reference chip

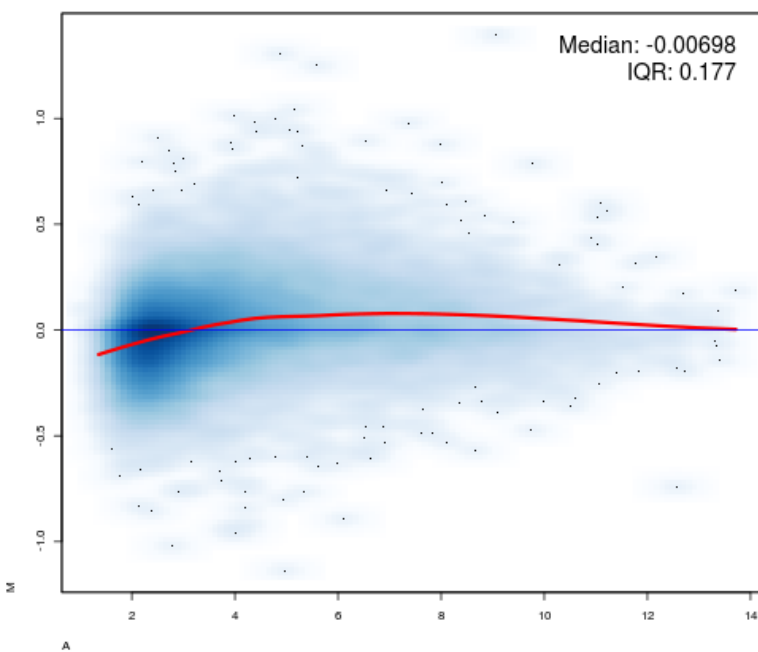

Array7 vs pseudo-median reference chip

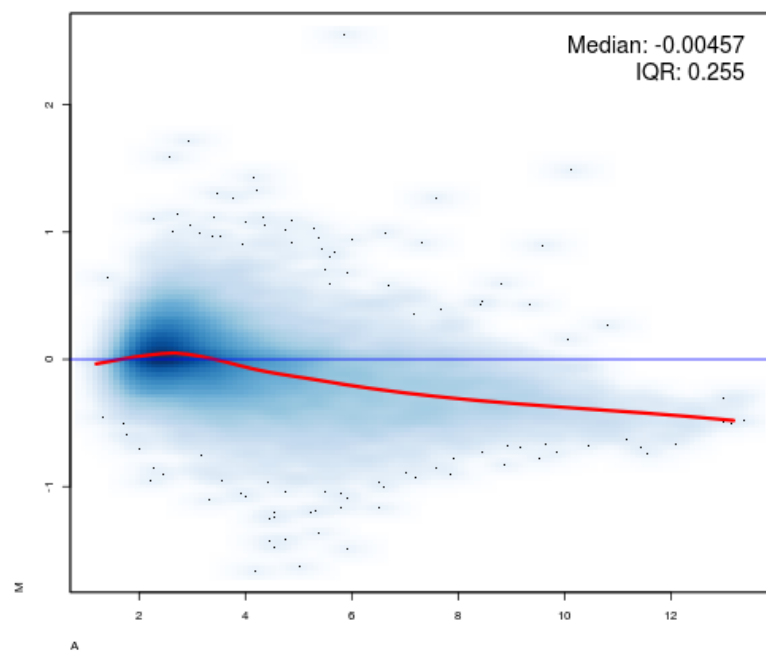

Array11 vs pseudo-median reference chip

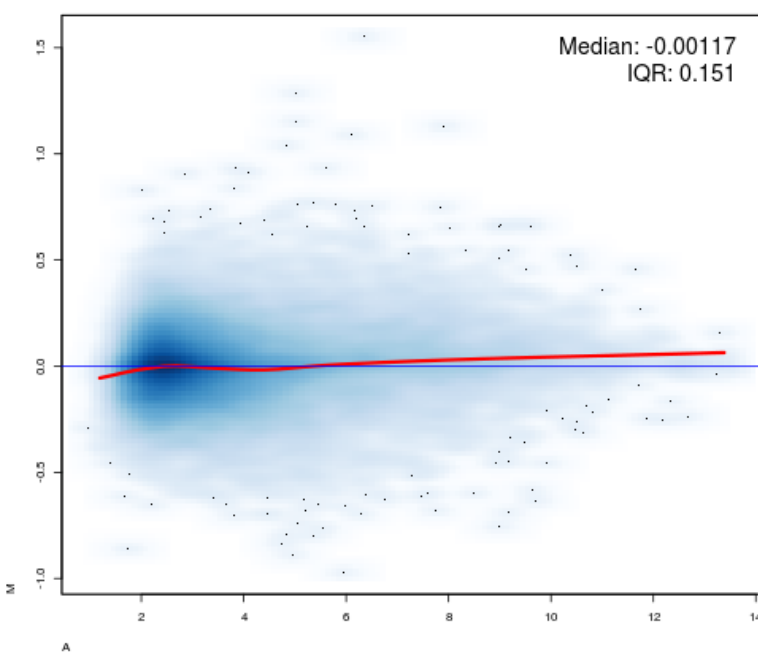

Array8 vs pseudo-median reference chip

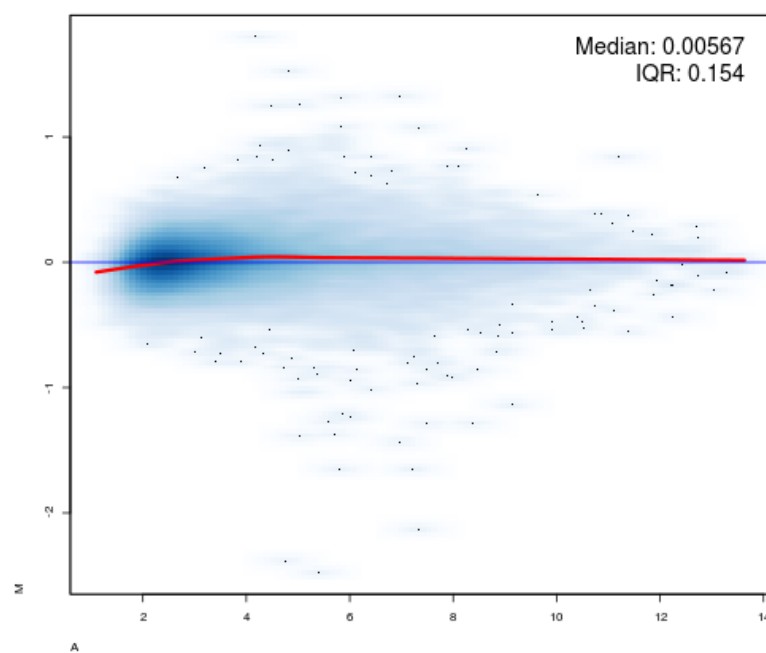

Array9 vs pseudo-median reference chip

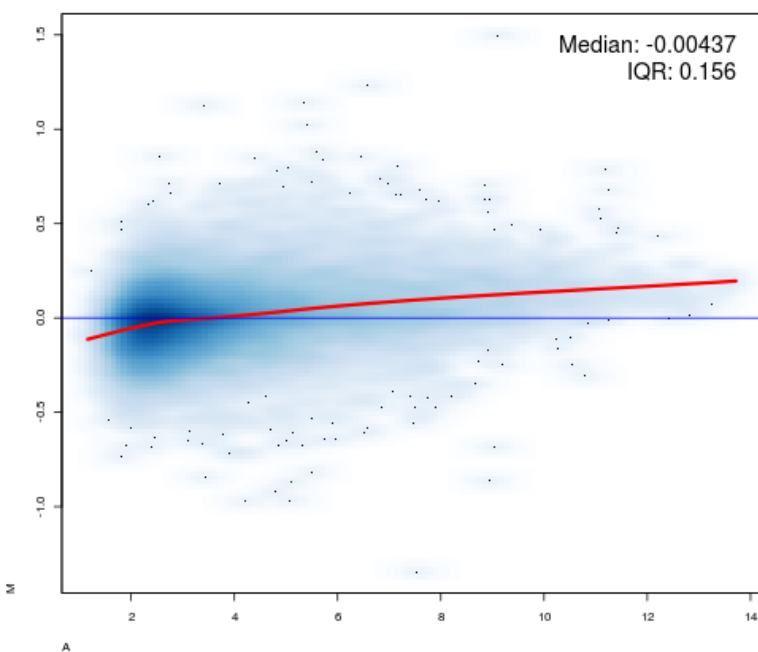

Array10 vs pseudo-median reference chip

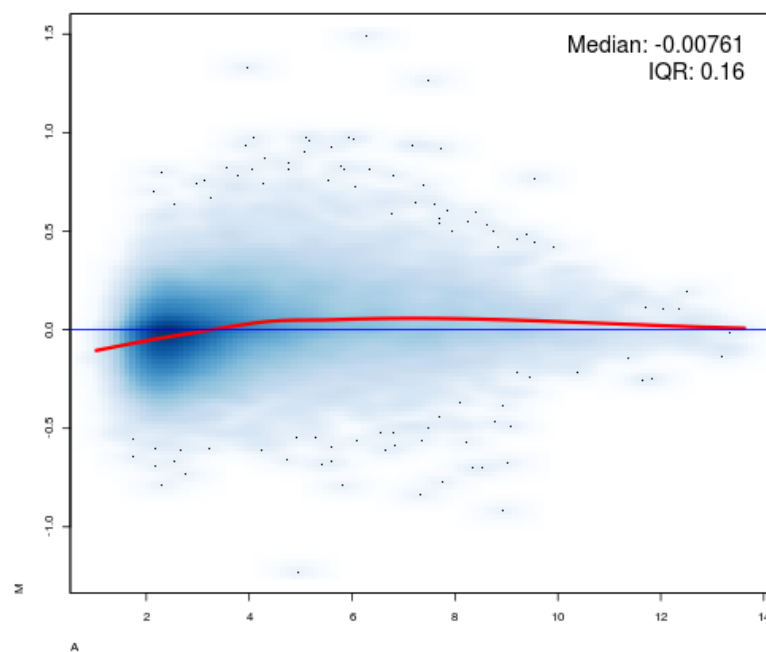

Color Key  
and Density Plot

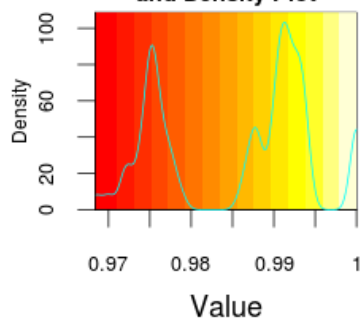

Array correlation plot  
after GCRMA normalization  
correlation method: pearson  
cluster method: ward

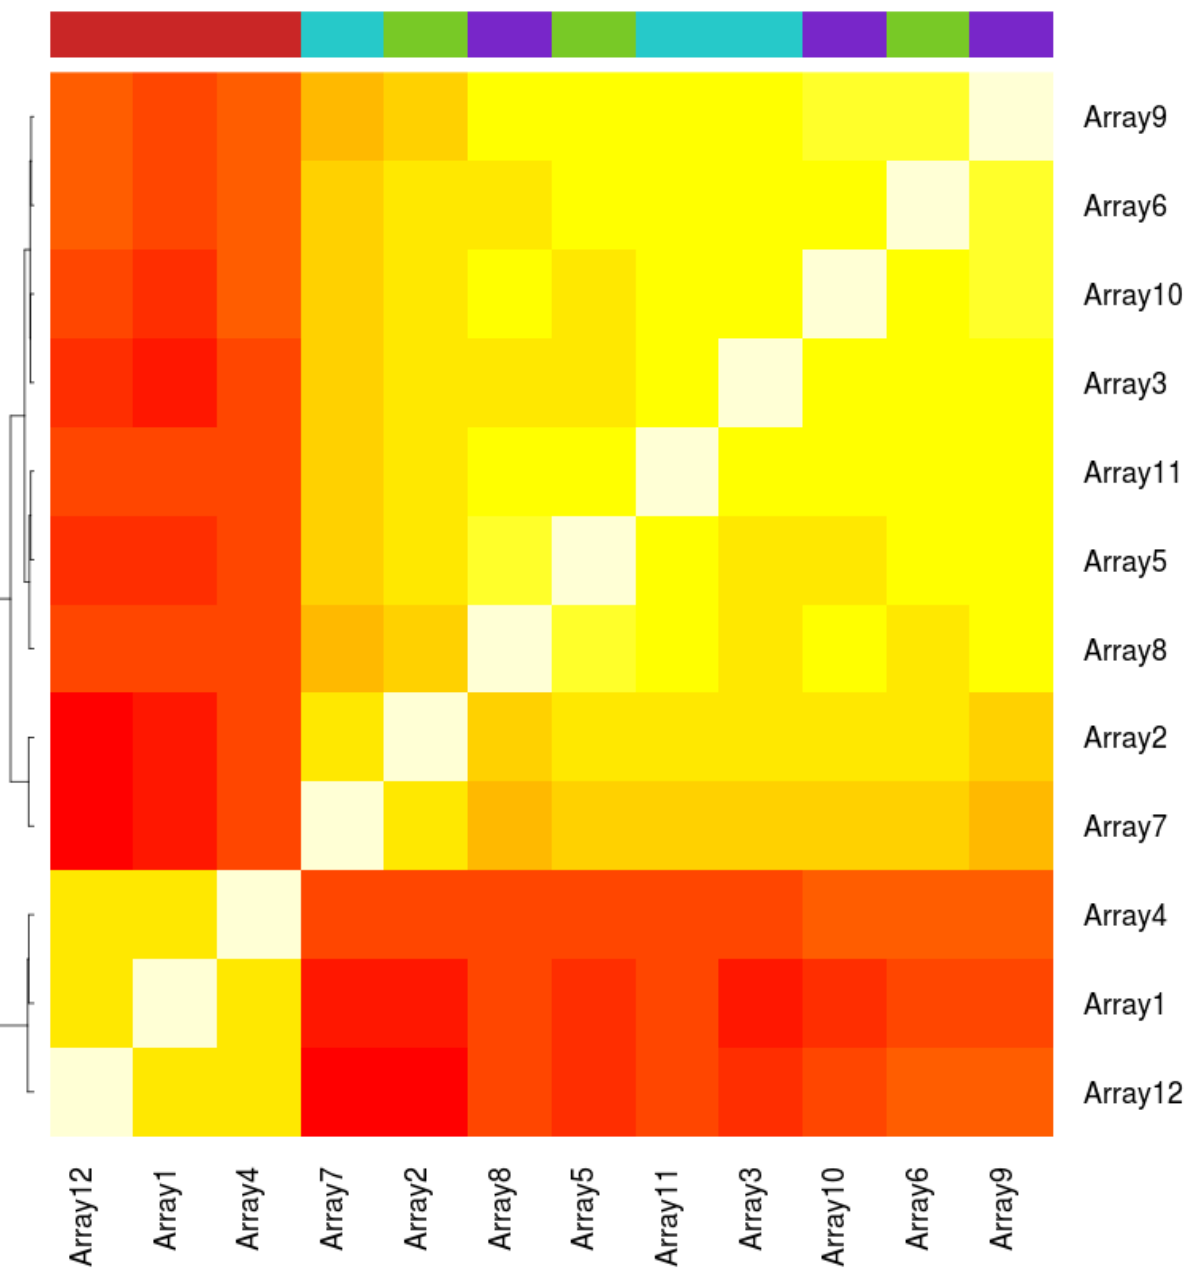

# PCA analysis after GCRMA normalization

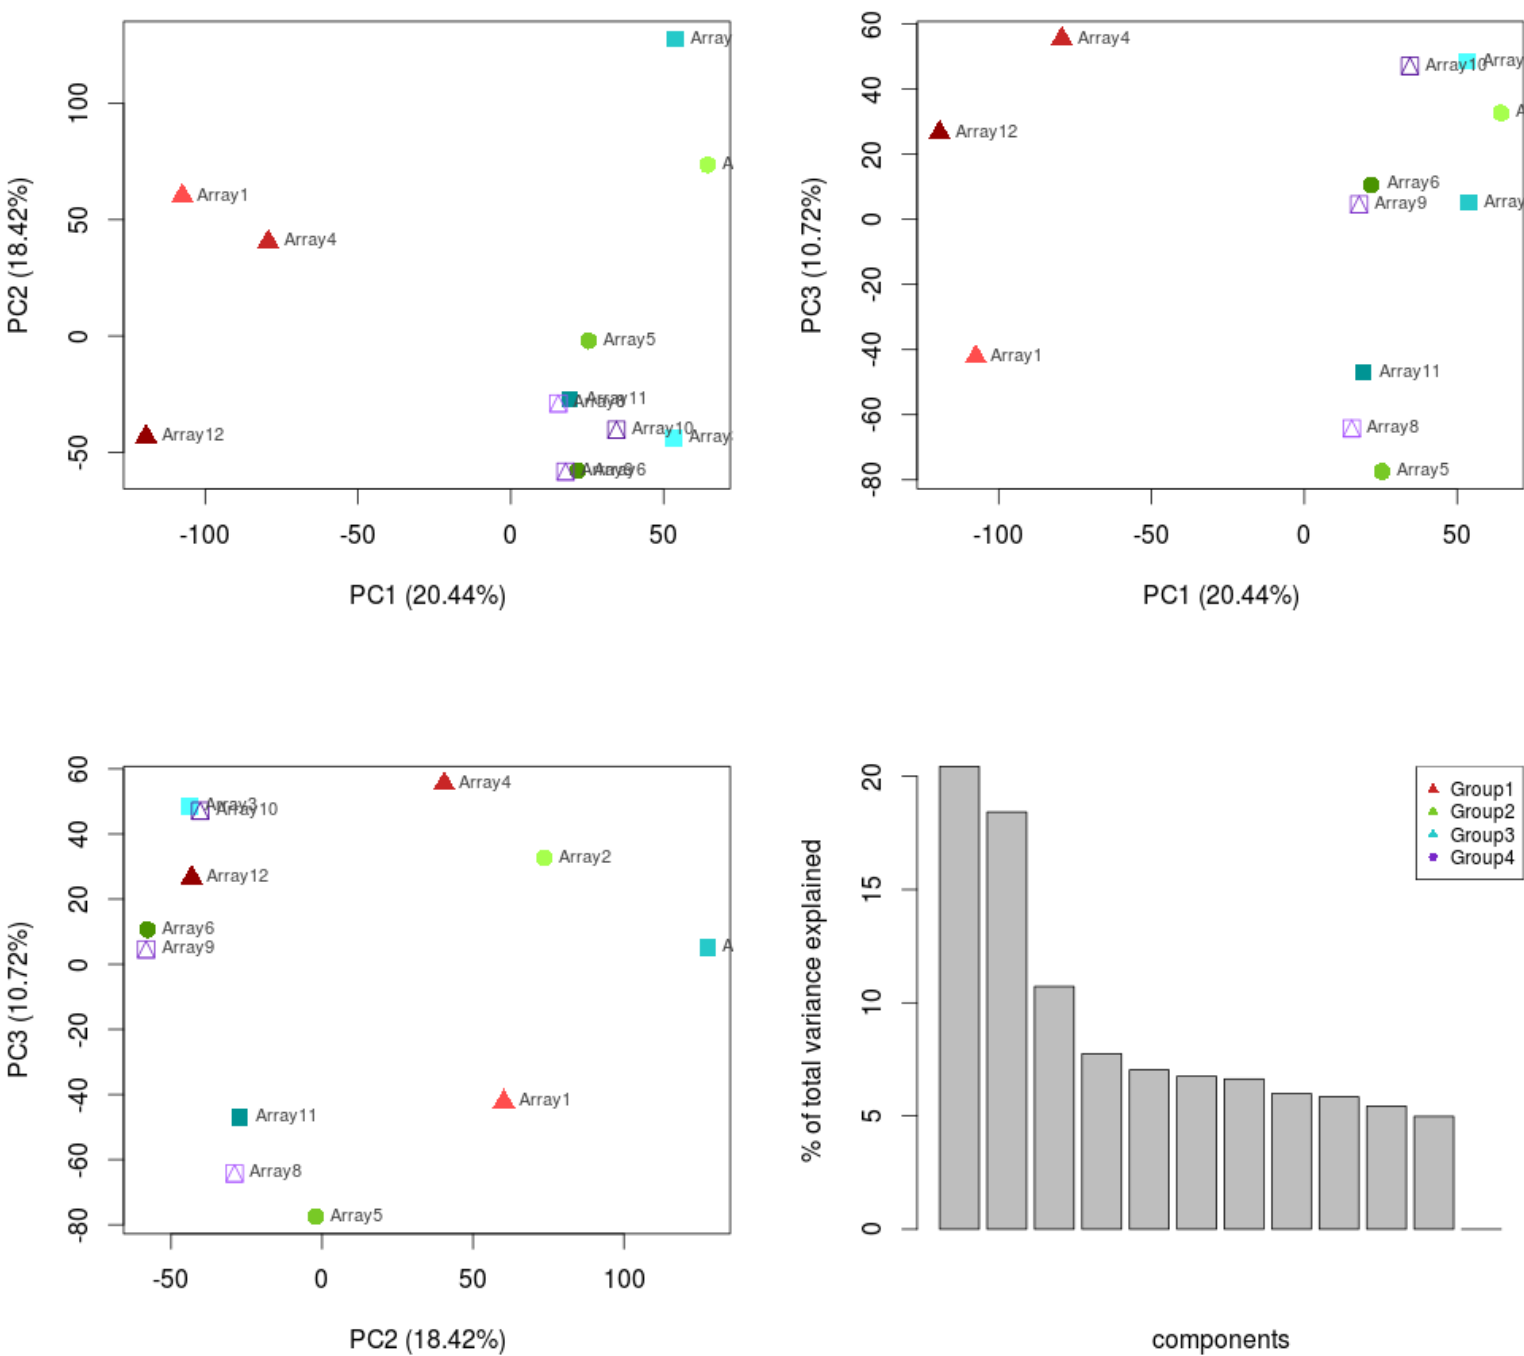

Cluster dendrogram of GCRMA normalized data

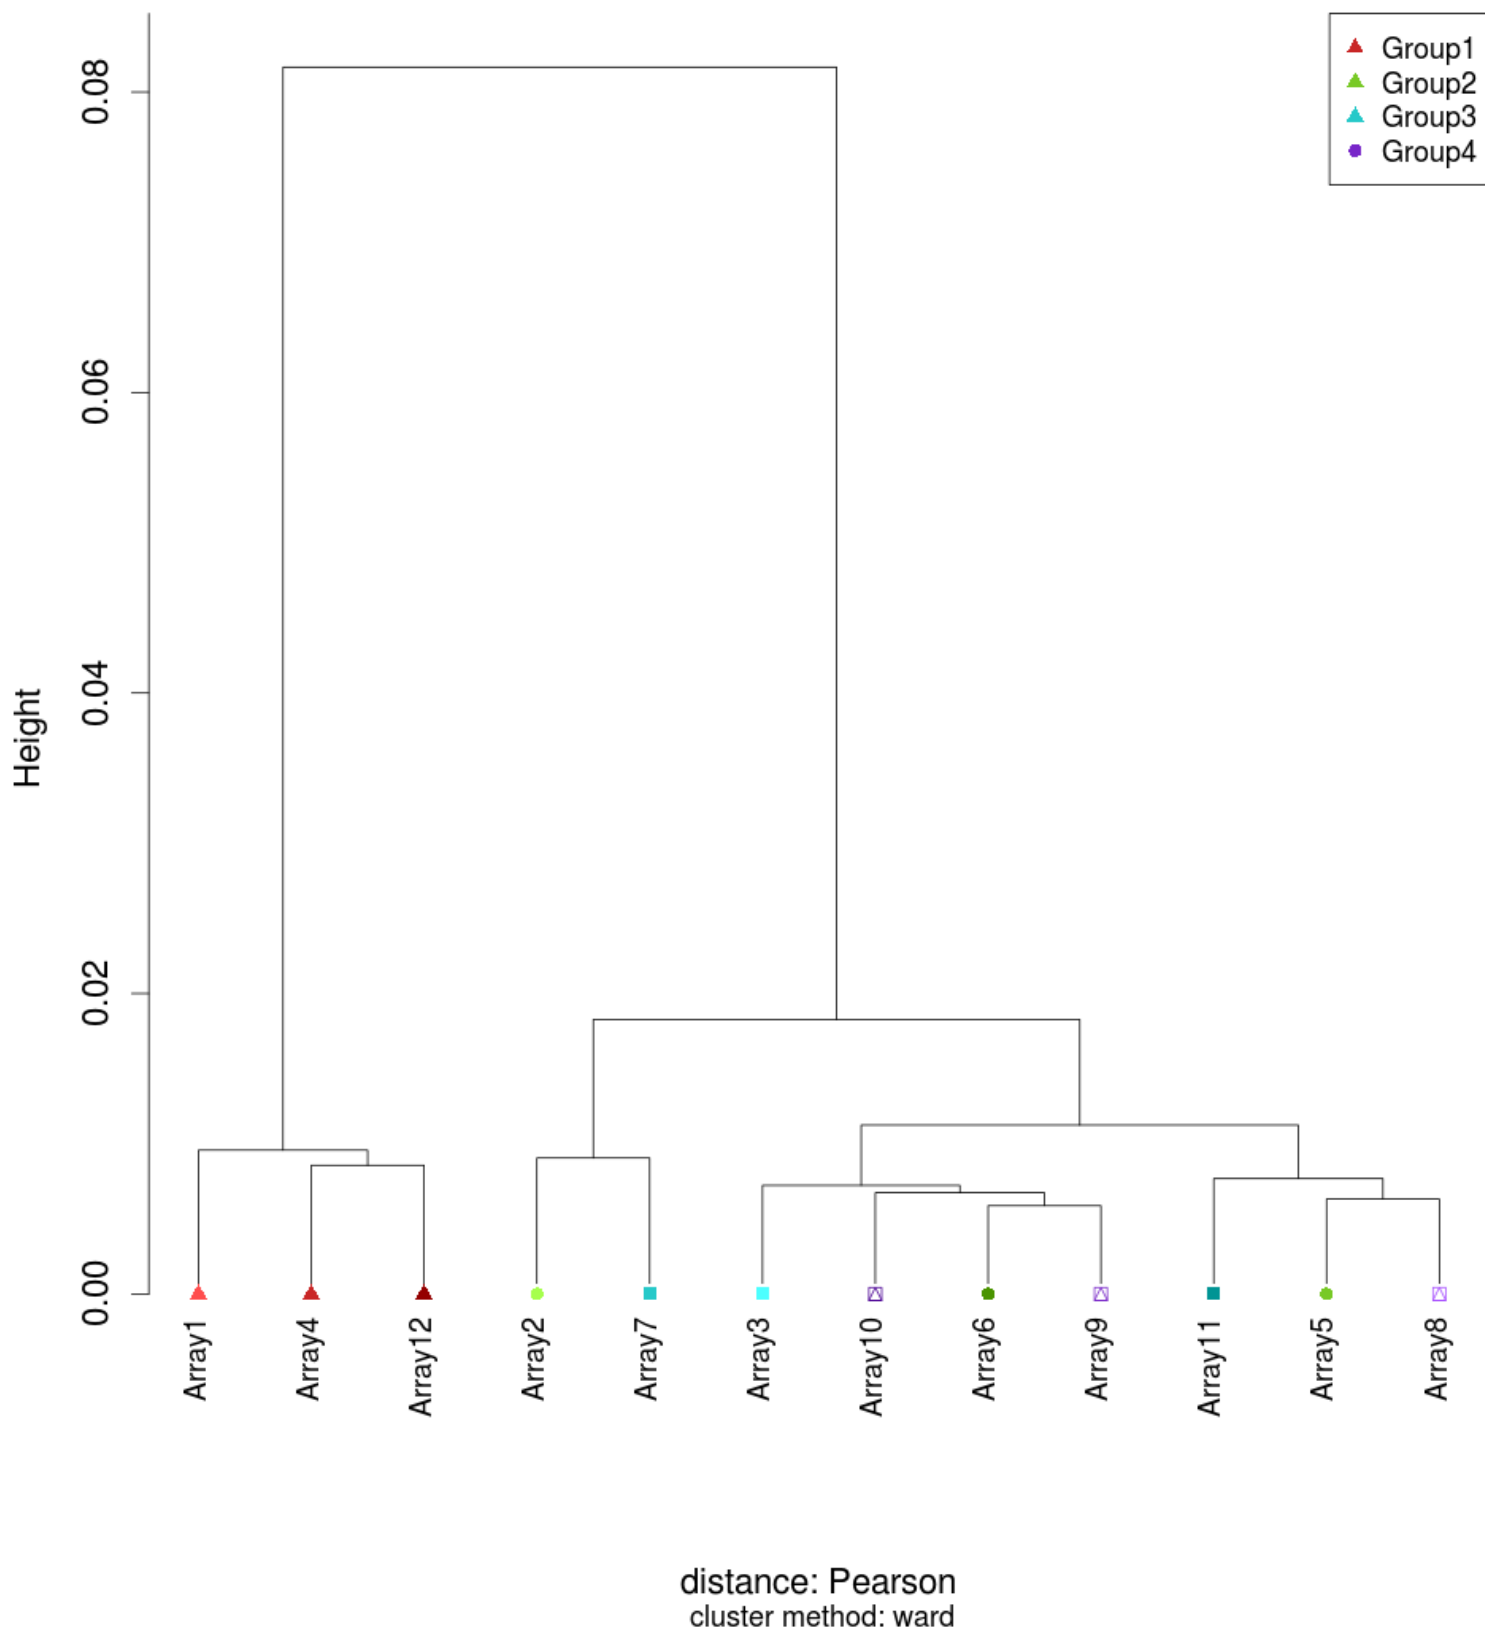

Supplement: Supplementary file 5 [file 2]
