# Supplementary material
Source: publisher figshare collection journal article supplement (https://tandf.figshare.com/articles/dataset/_/7886671)
Supplement: Supplementary file 2 [file 2]

Quality Control & Pre-processing Evaluation  
of  
E-GEOD-6955.raw.1\_0  
**REPORT**

Array names and grouping

| ArrayDataFile | SourceName | FactorValue |
|---------------|------------|-------------|
| GSM160311.CEL | Array1     | Group1      |
| GSM160306.CEL | Array2     | Group1      |
| GSM160309.CEL | Array3     | Group1      |
| GSM160310.CEL | Array4     | Group1      |
| GSM160307.CEL | Array5     | Group1      |
| GSM160308.CEL | Array6     | Group1      |

# Summary of raw data quality indicators

blue = "within" / red = "out of" recommended cut-off

|        | 3'/5' beta-actin<br>(cutoff=3) | 3'/5' GAPDH<br>(cutoff= 1.25) | Hybridization<br>BioB<BioC<BioD<CreX | Hybridization<br>BioB=Present | Percent Present<br>spread<= 10% | Background<br>spread<=20% | Log Scale Factor<br>spread<=3 |
|--------|--------------------------------|-------------------------------|--------------------------------------|-------------------------------|---------------------------------|---------------------------|-------------------------------|
| Array1 | 1.01                           | 0.98                          | T                                    | P                             | 47 %                            | 77                        | -0.86                         |
| Array2 | 1.04                           | 1.01                          | T                                    | P                             | 48 %                            | 67                        | -0.64                         |
| Array3 | 1.04                           | 1.04                          | T                                    | P                             | 47 %                            | 46                        | 0.36                          |
| Array4 | 1.02                           | 1.02                          | T                                    | P                             | 45 %                            | 63                        | -0.33                         |
| Array5 | 1.02                           | 1.03                          | T                                    | P                             | 44 %                            | 82                        | -0.76                         |
| Array6 | 1.04                           | 1.05                          | T                                    | P                             | 41 %                            | 44                        | 0.52                          |

# RNA degradation of beta-actin

3'/5' and 3'/M ratios

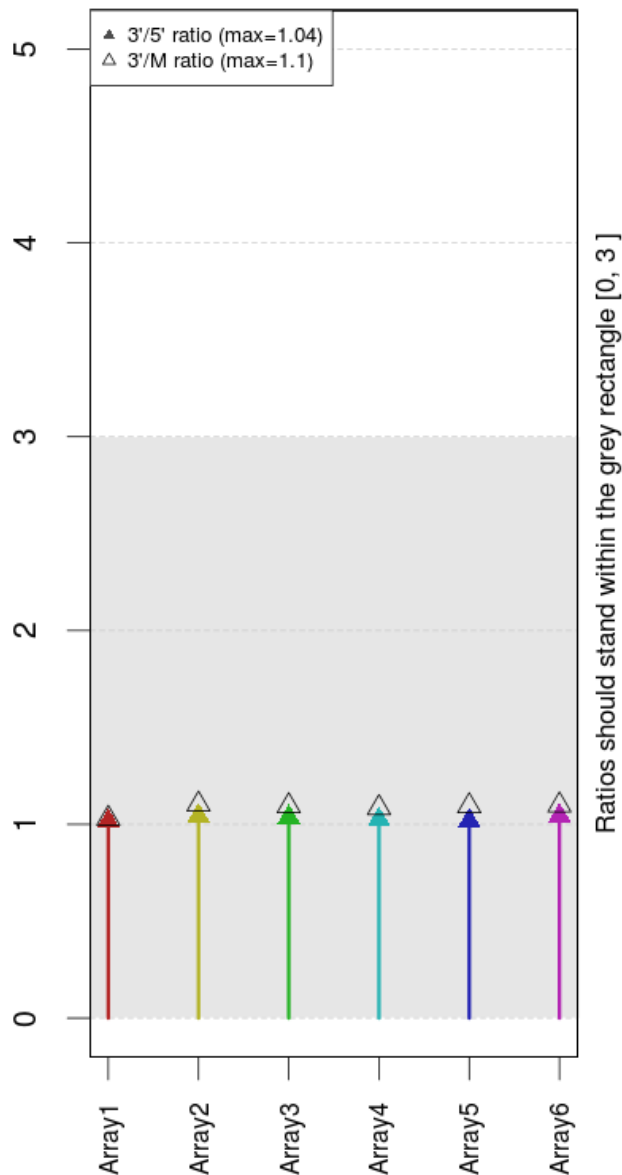

# Boxplot of beta-actin ratios

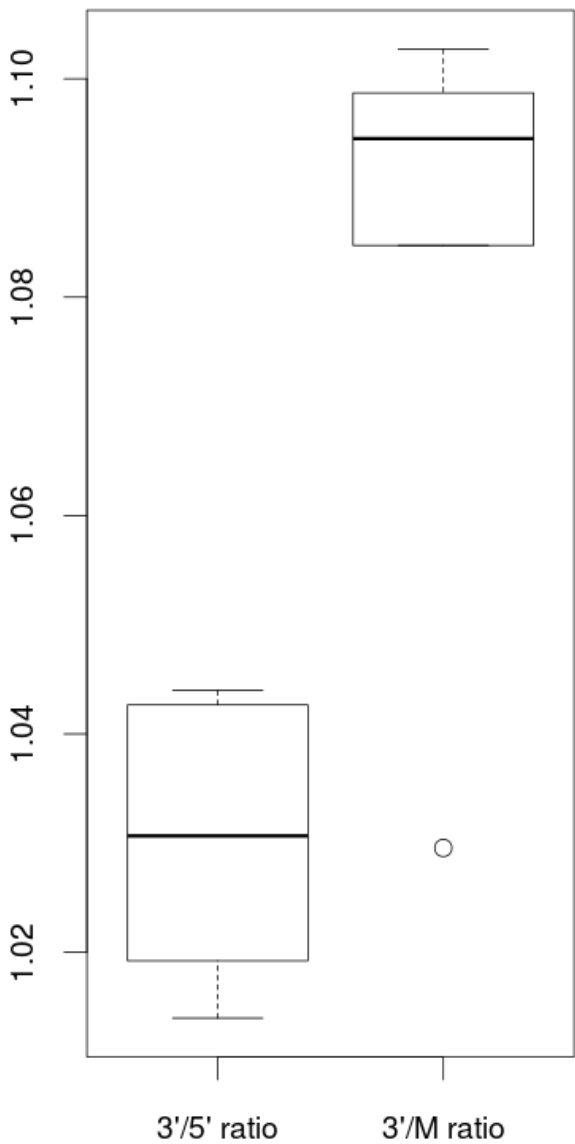

beta-actin QC: OK (all 3'/5' ratios < 3)

# RNA degradation of GAPDH

3'/5' and 3'/M ratios

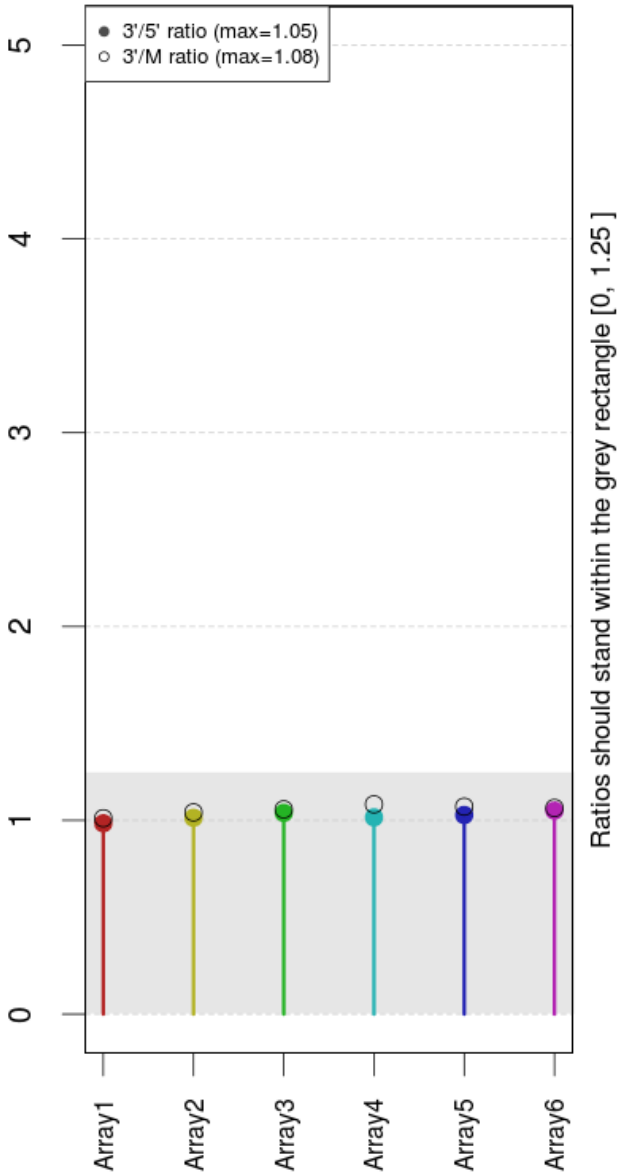

# Boxplot of GAPDH ratios

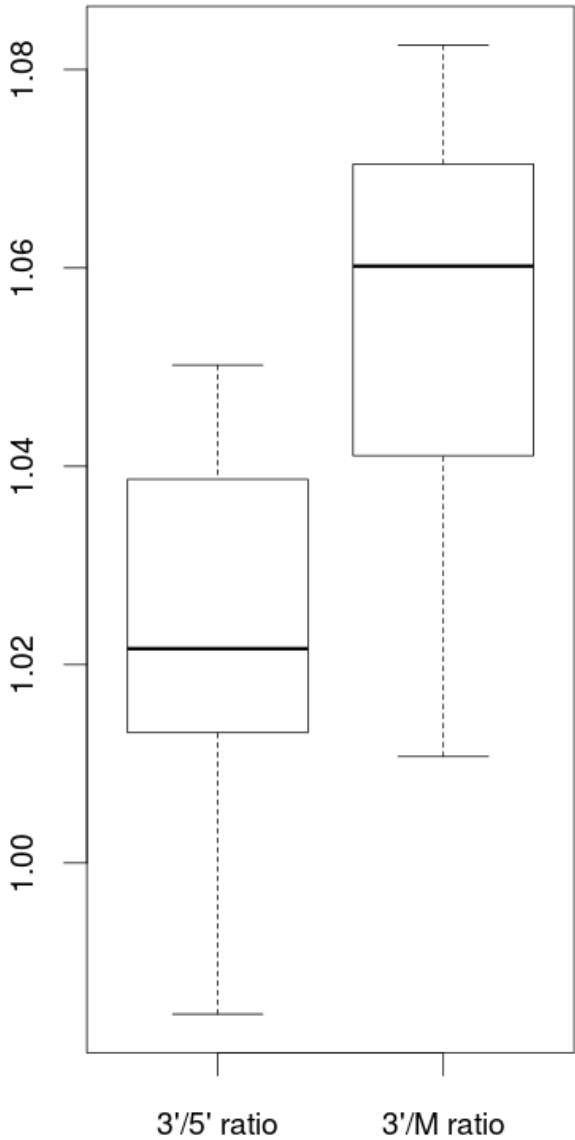

GAPDH QC: OK (all 3'/5' ratios < 1.25)

# RNA degradation plot

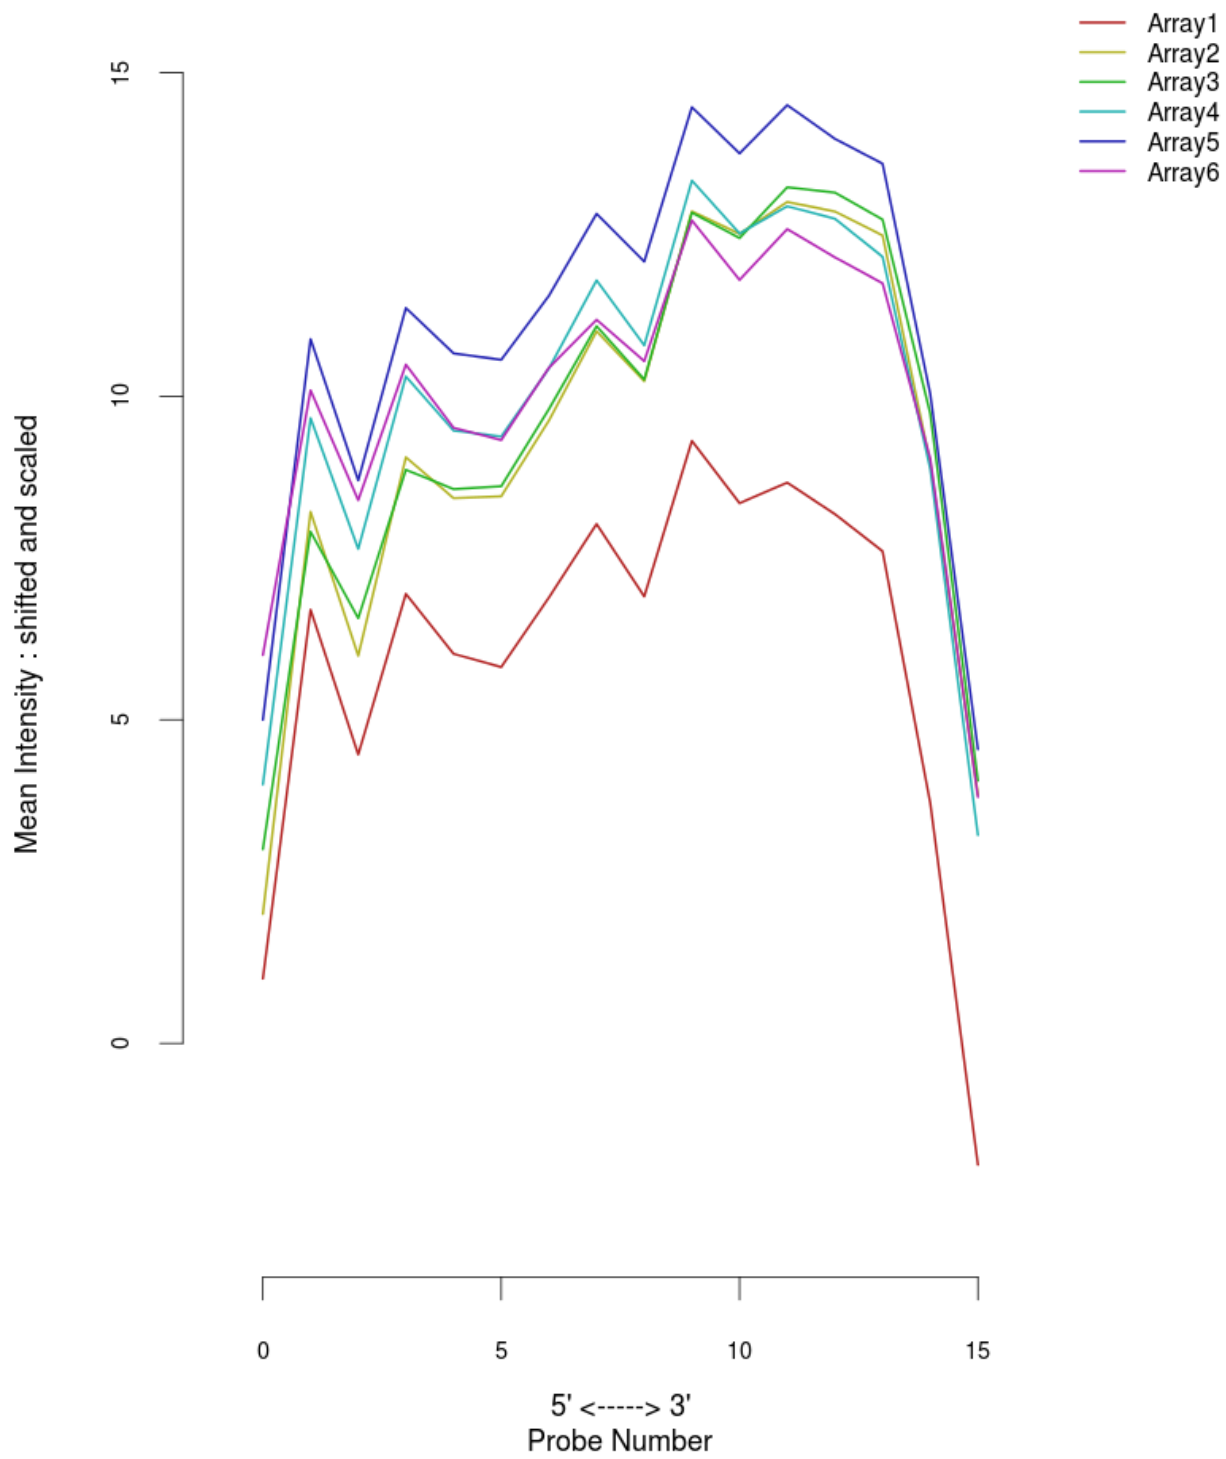

# Spike-in Hybridization controls intensities and calls

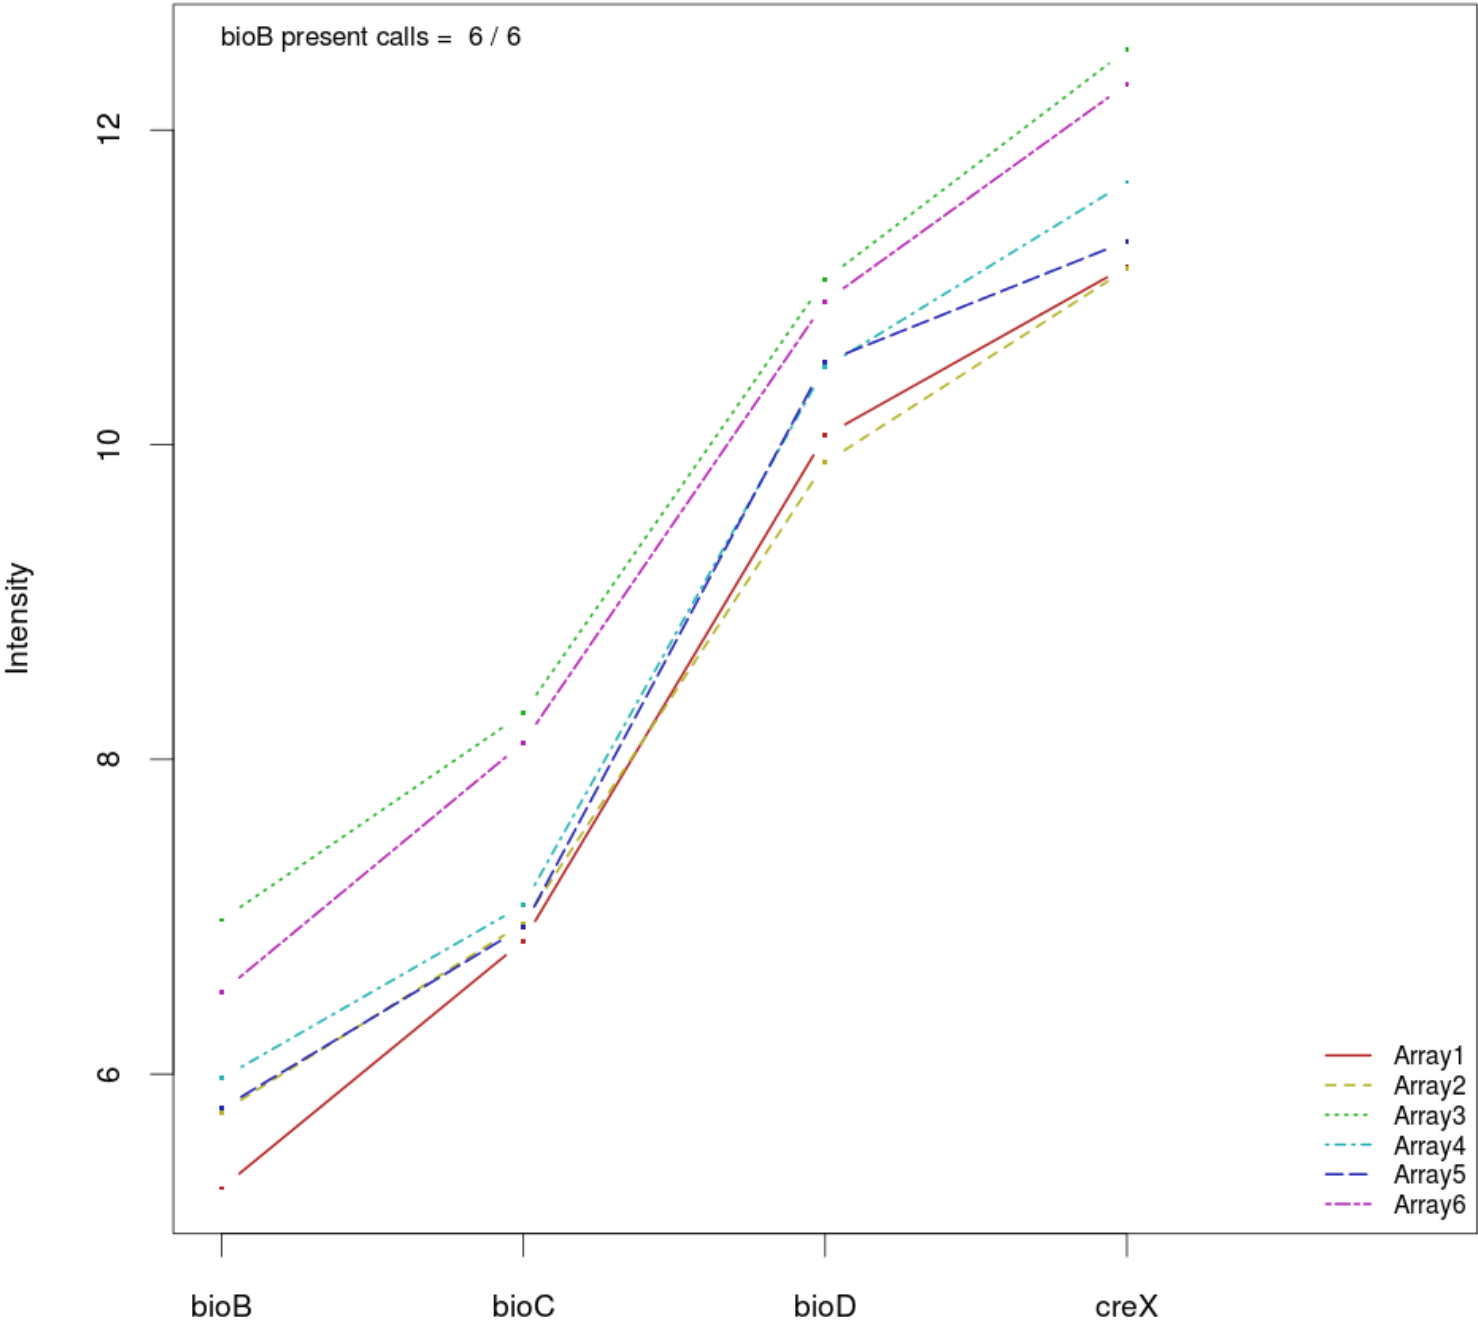

Intensities: OK (bioB < bioC < bioD < creX for all arrays)  
BioB Present calls: OK (indeed all bioB are called present)

Plot of background intensity

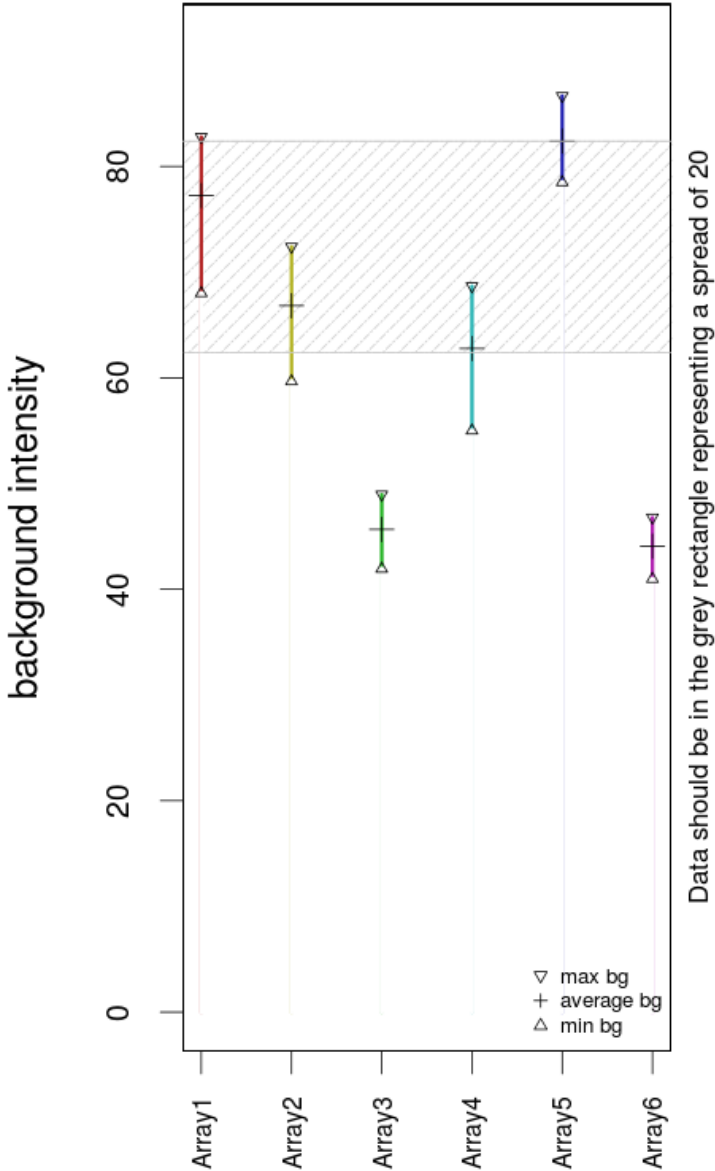

Average background intensity

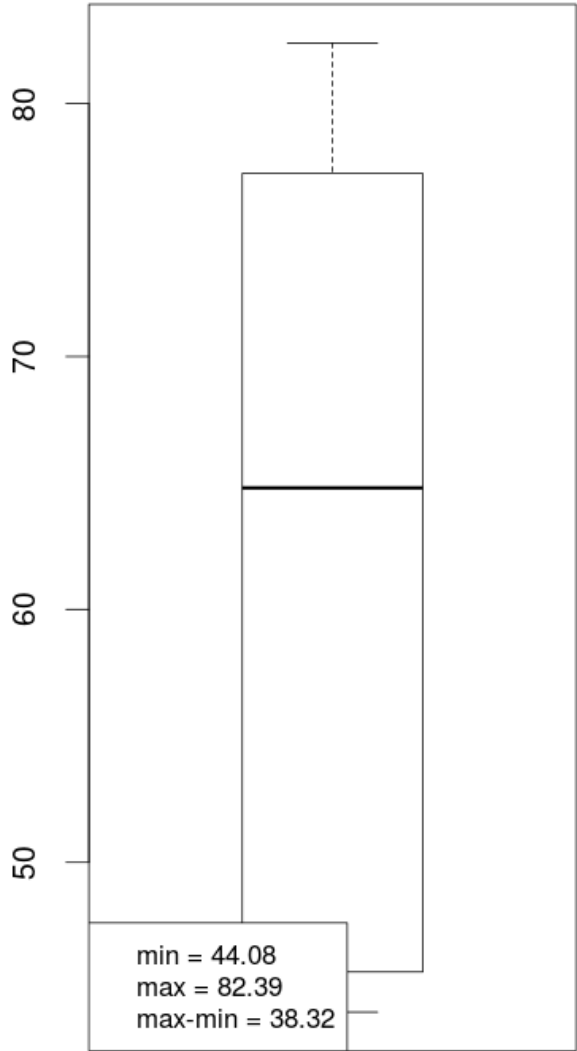

Background QC: not OK (spread > 20)



Plot of percent present

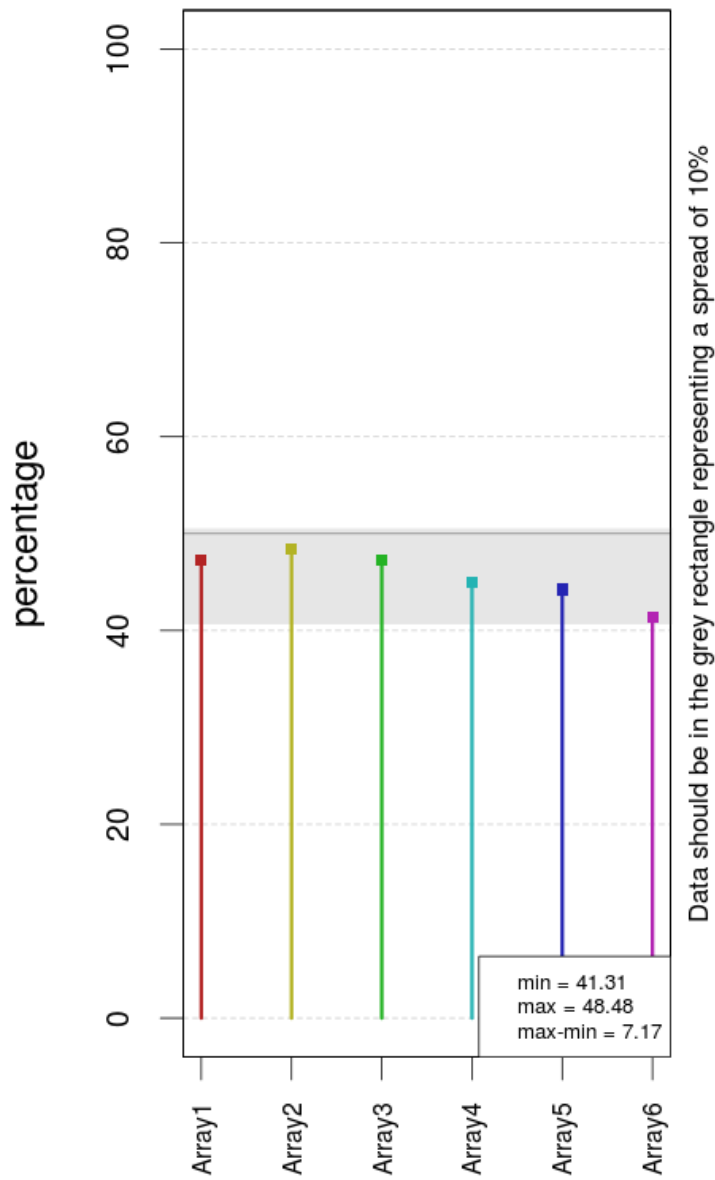

Boxplot of percent present

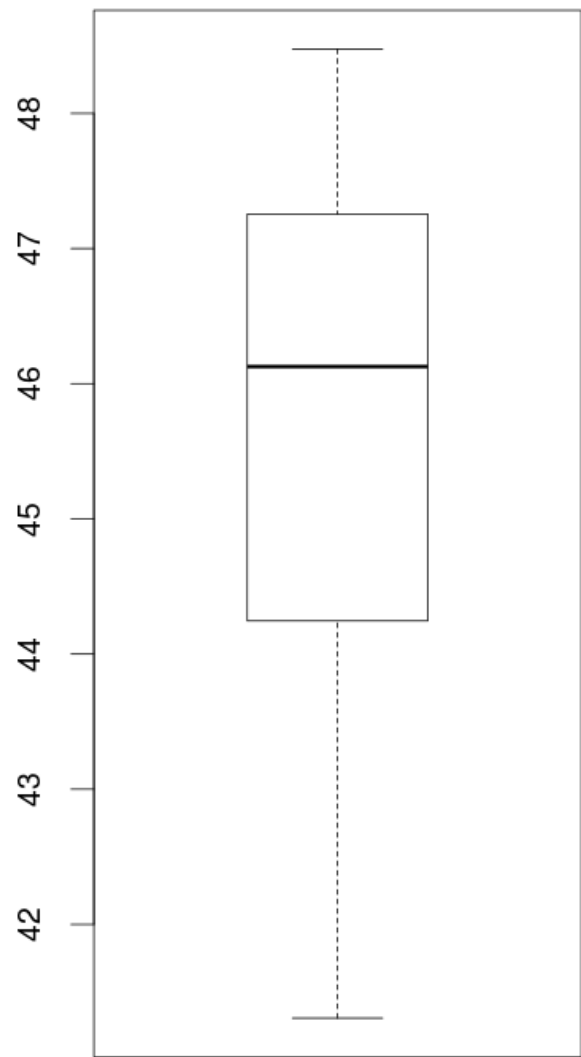

Percent present QC: OK (spread <= 10%)

# affx control profiles

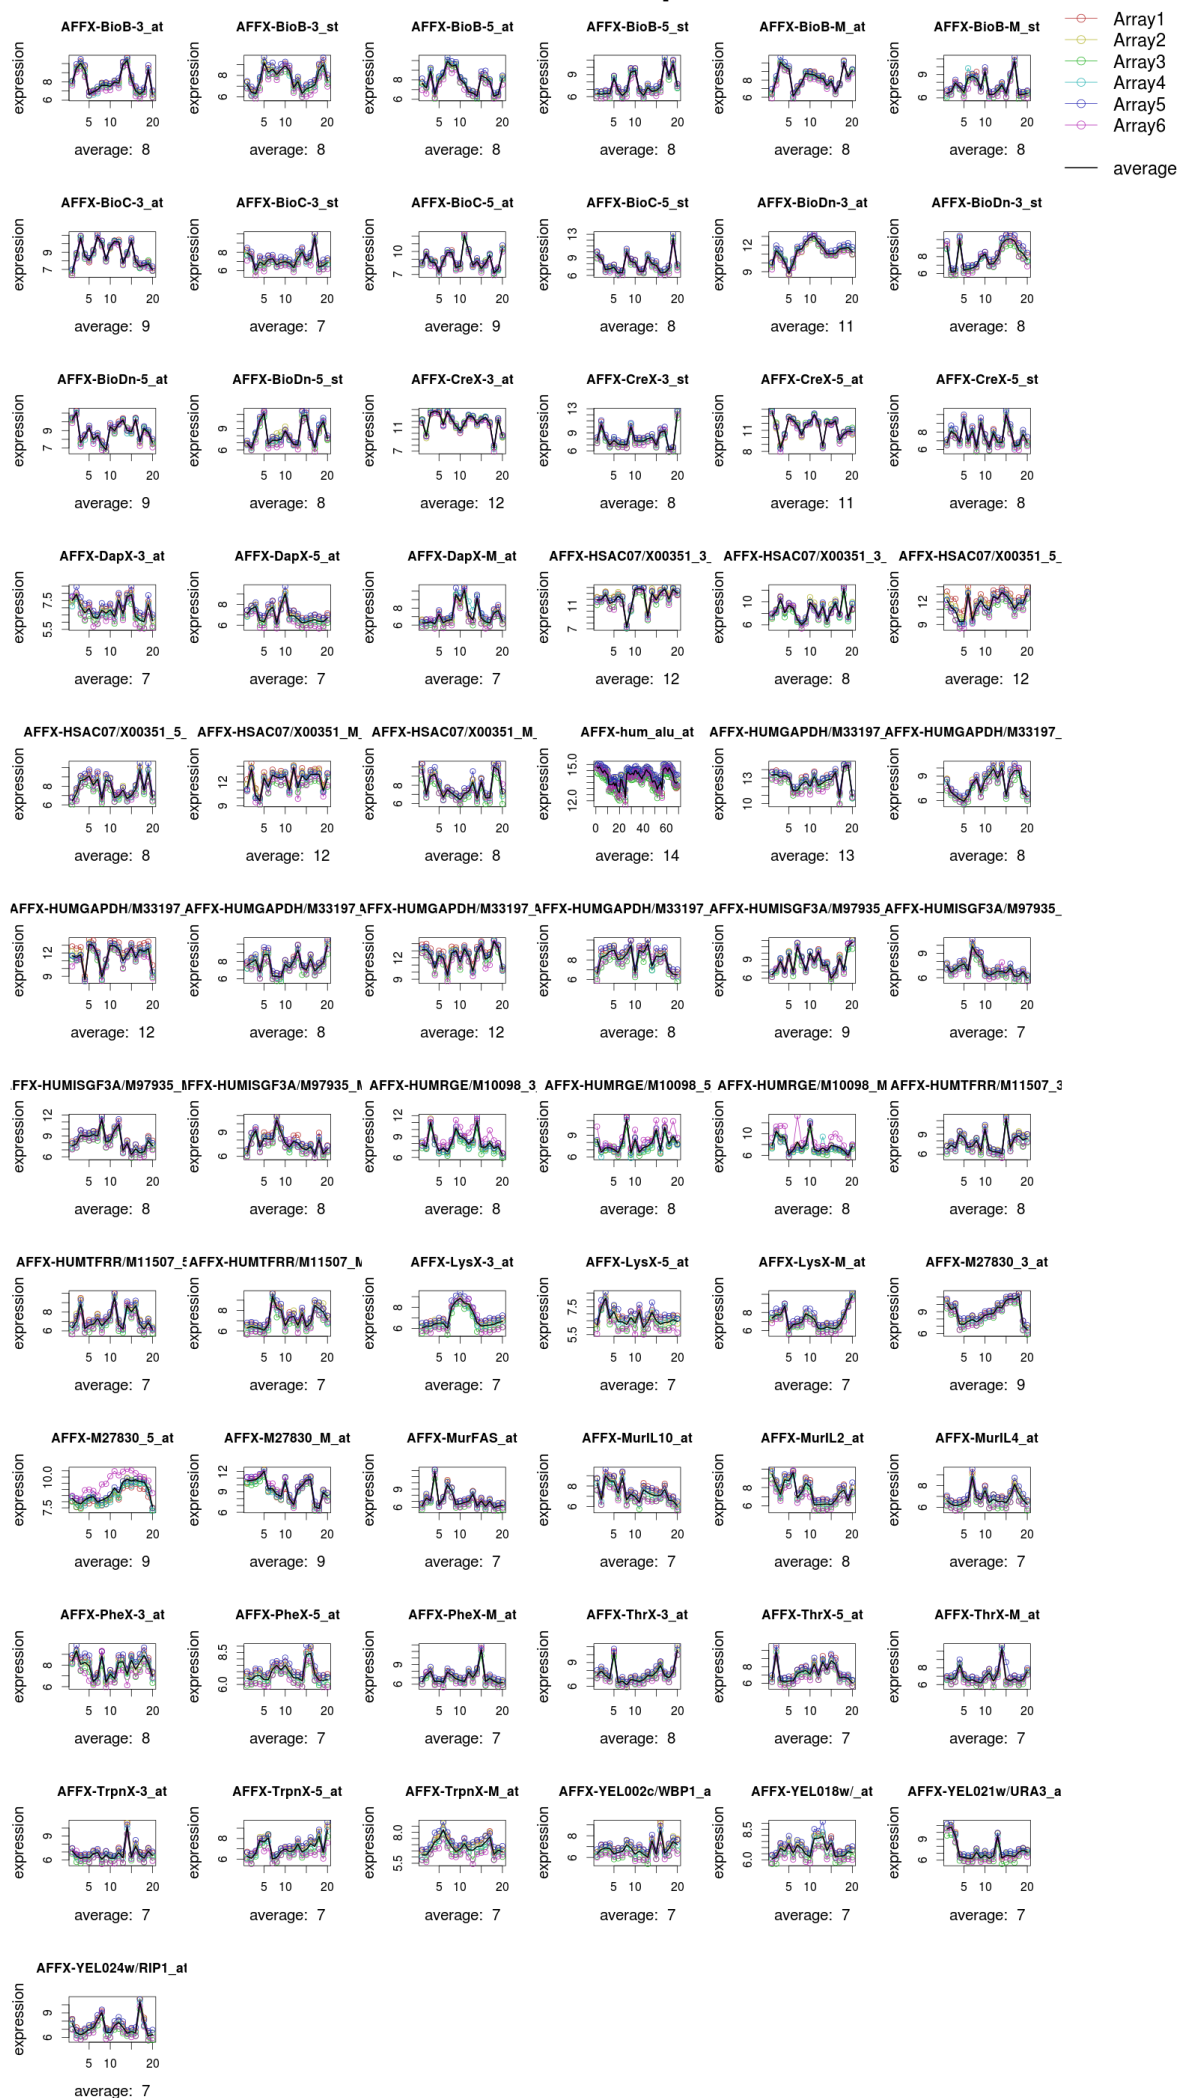

# affx controls

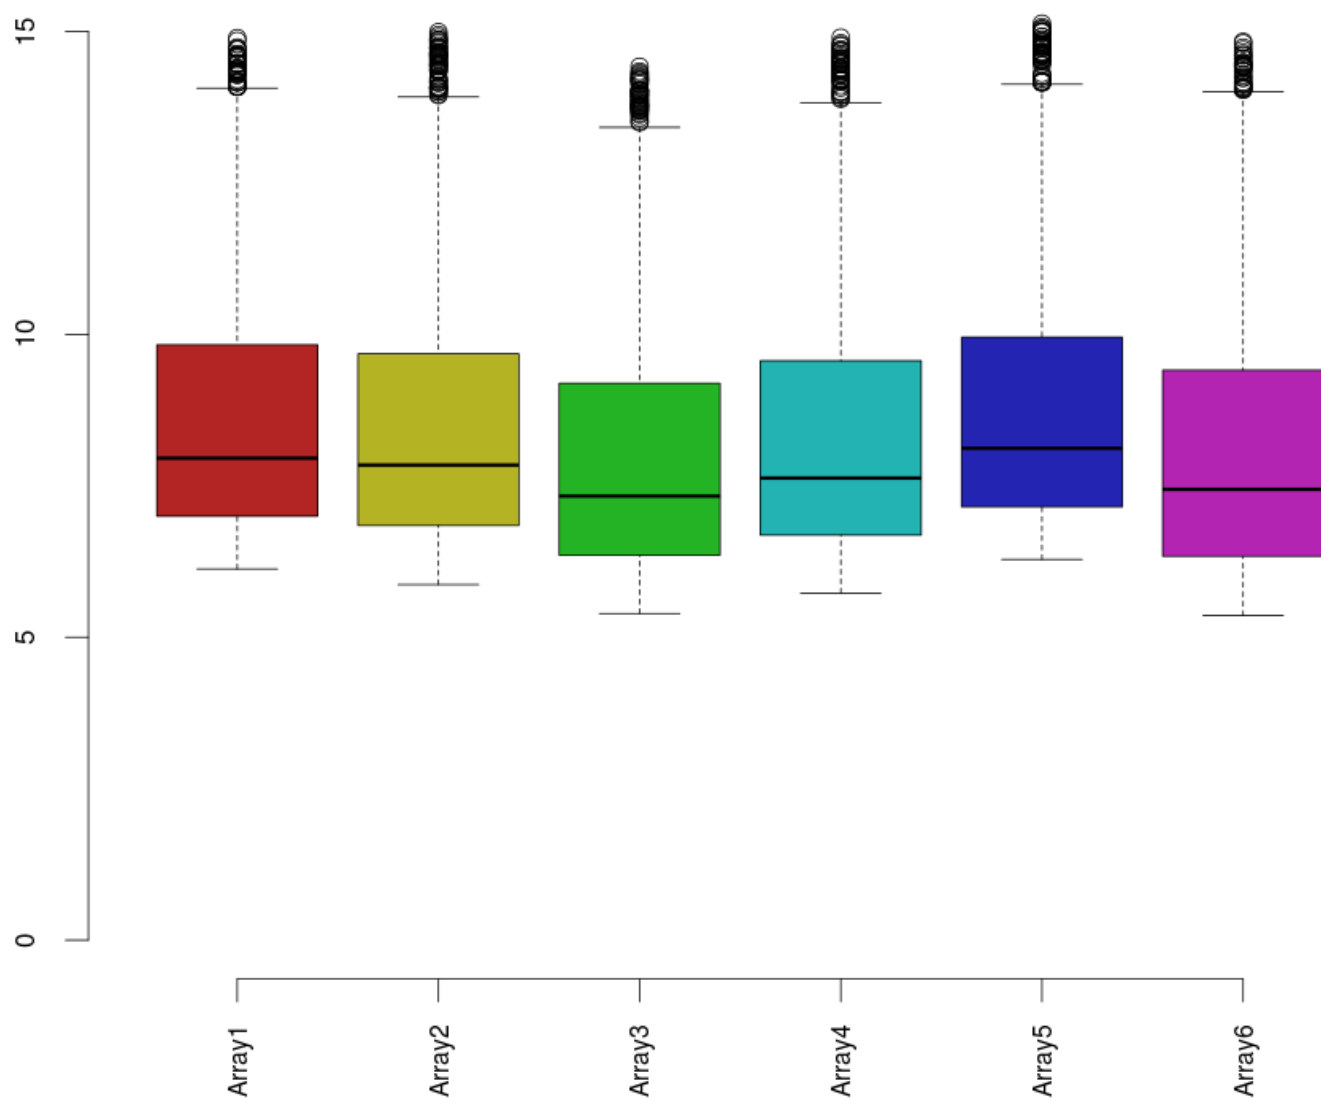

Plot of Log scale factors

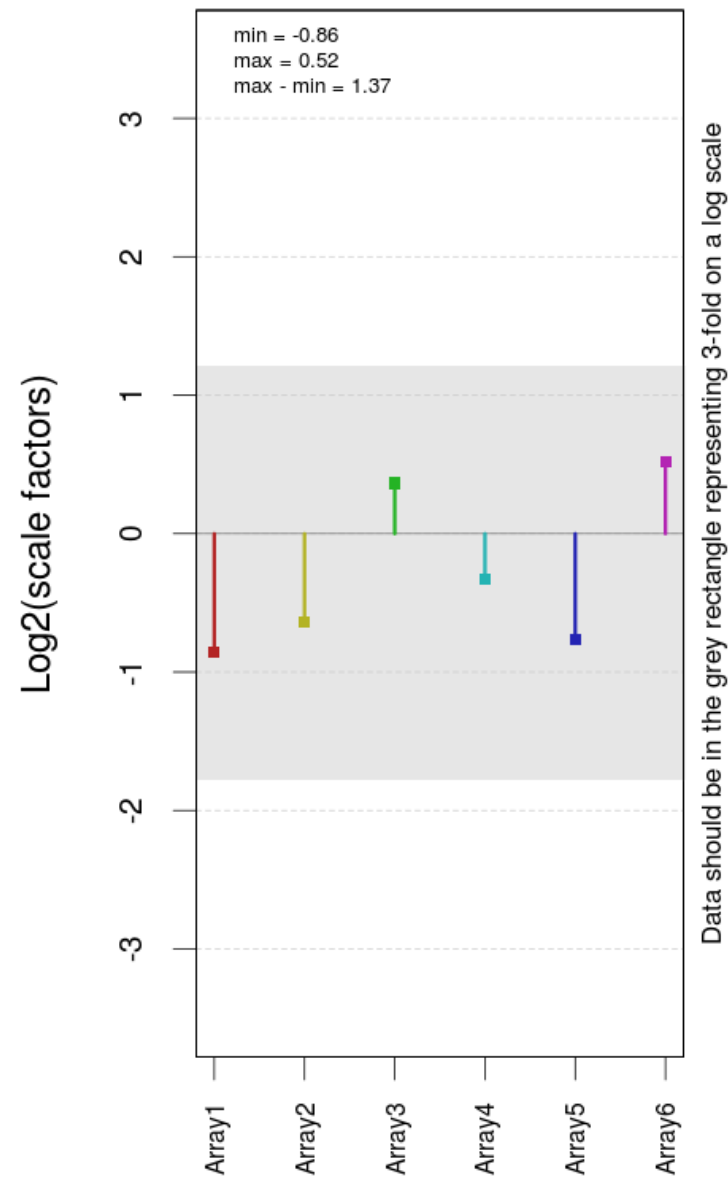

Boxplot of scale factors  
(natural scale)

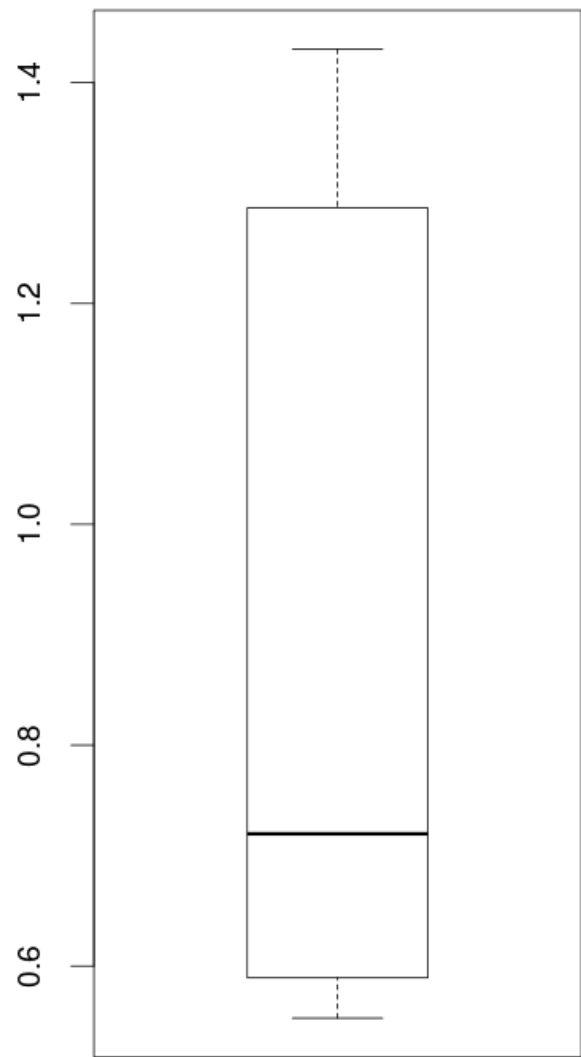

Scale factors QC: OK (spread < 3-fold)

# Boxplot of raw intensities

Distributions should be comparable between arrays

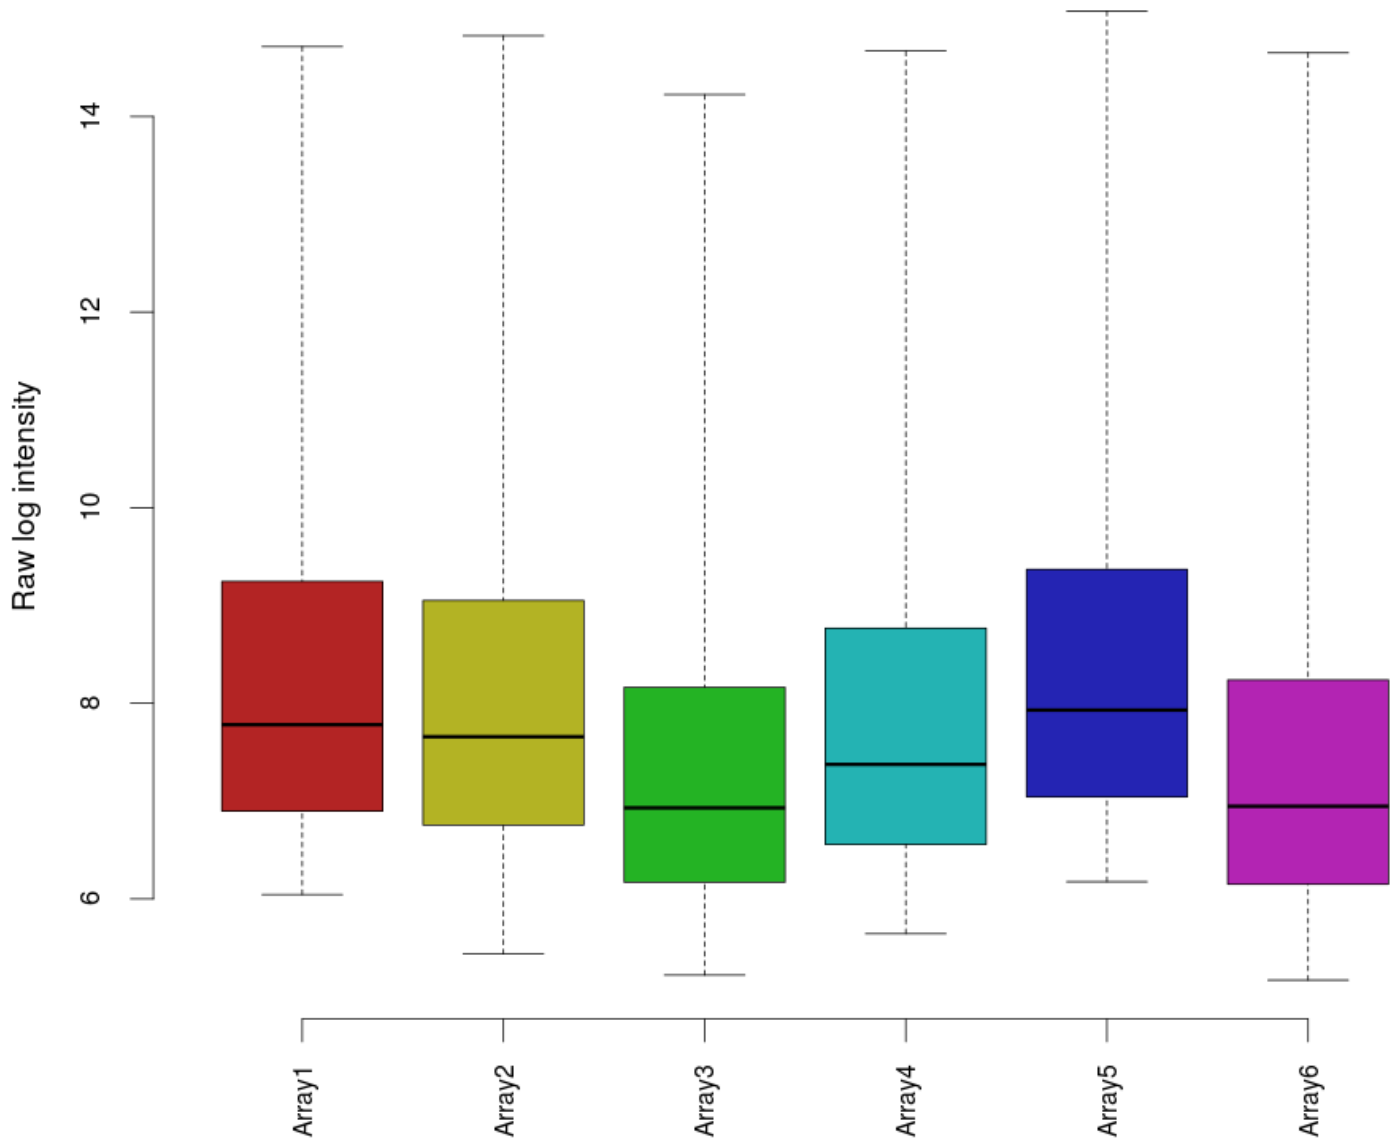

# Density histogram of raw intensities

Curves should be comparable between arrays

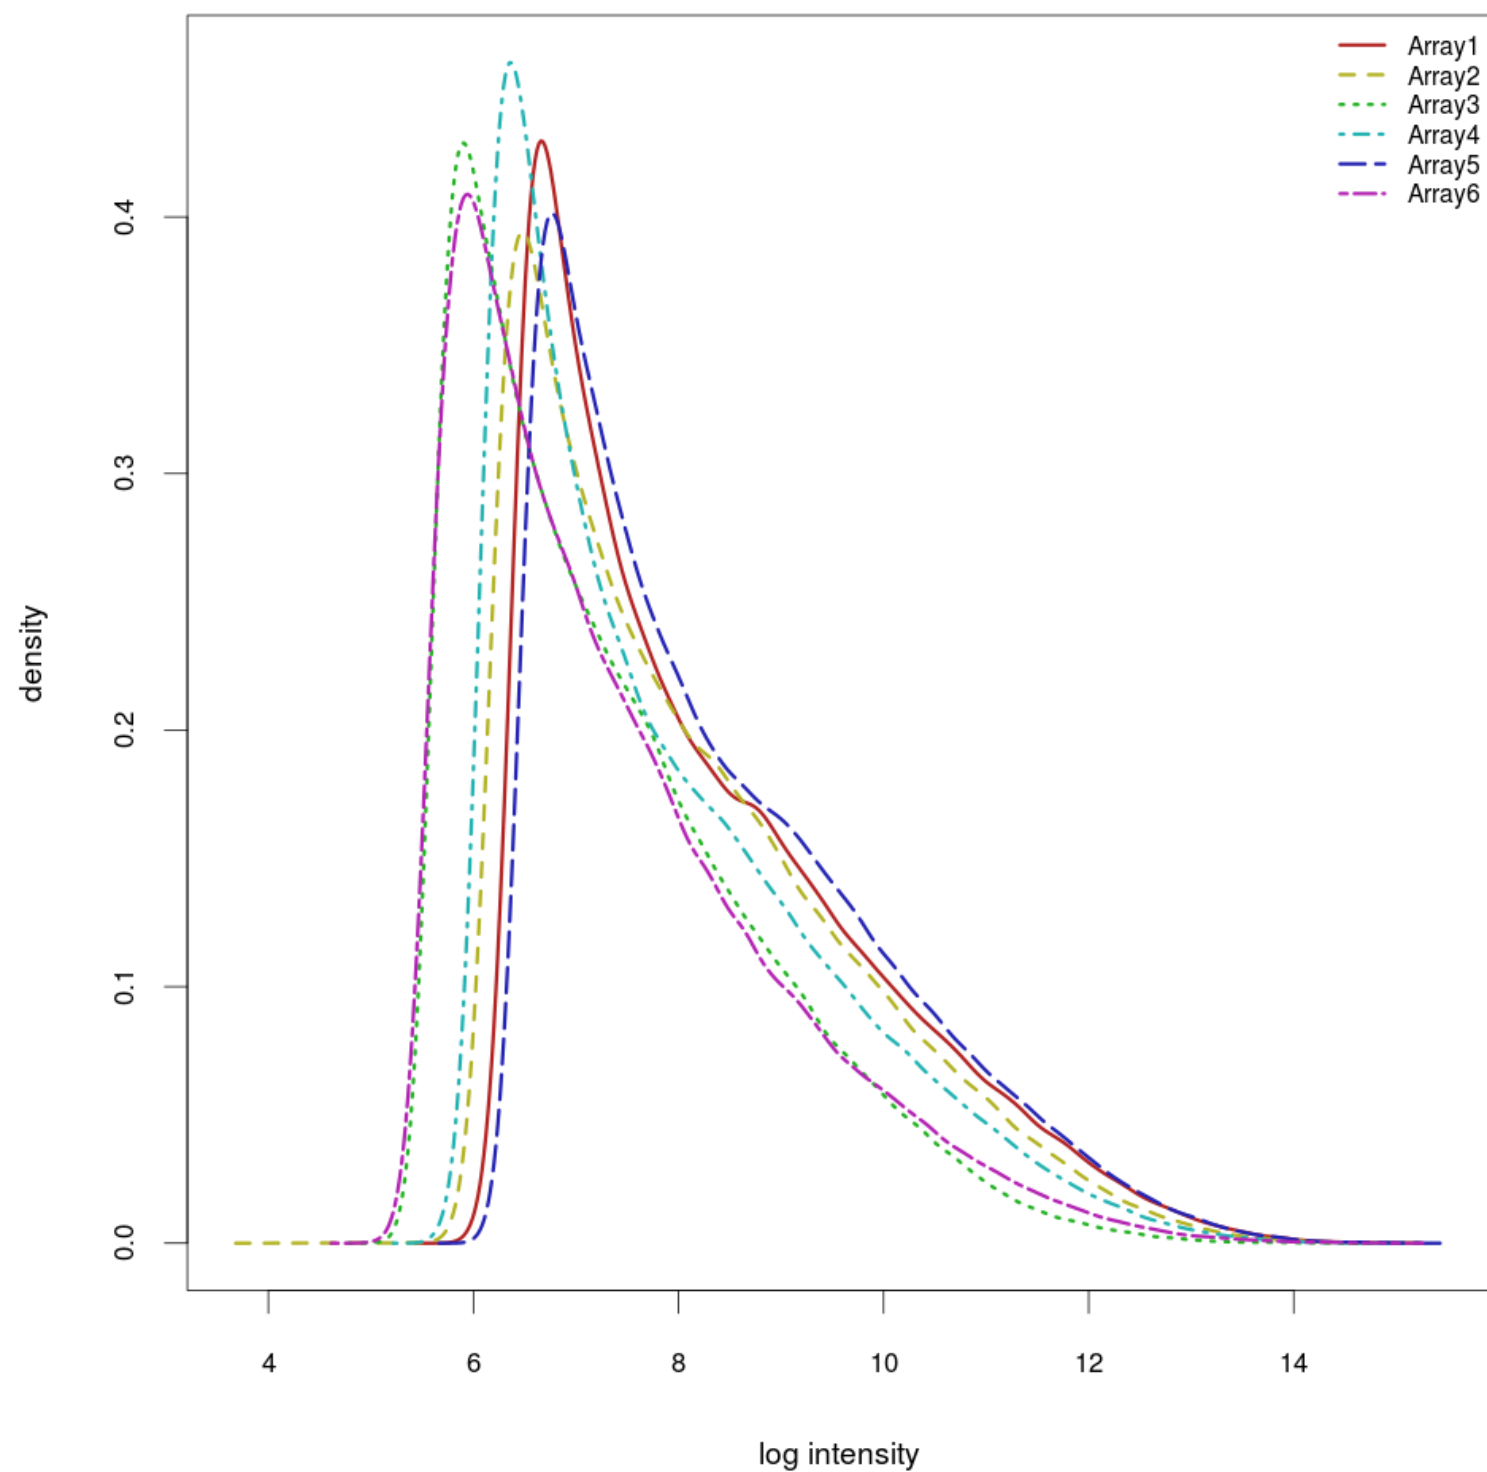

# MA plots of raw data

Array1 vs pseudo-median reference chip

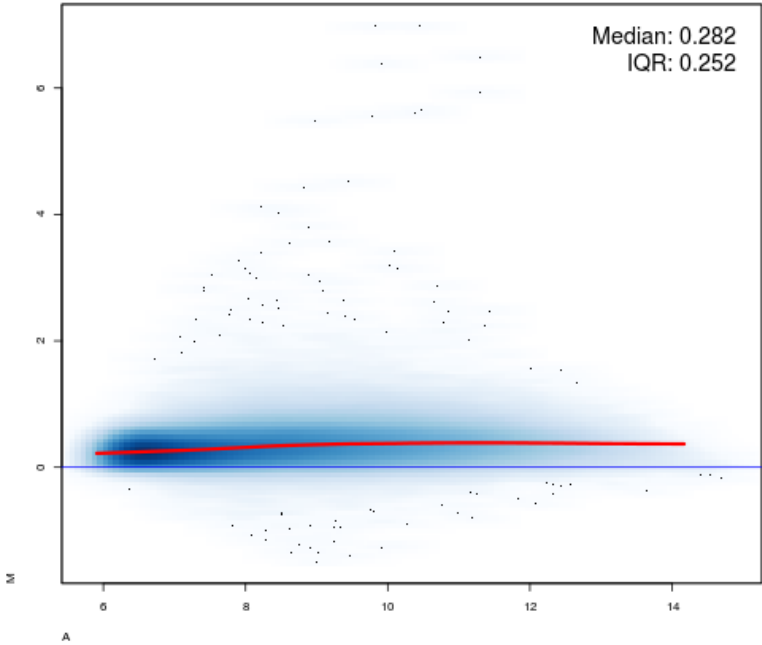

Array2 vs pseudo-median reference chip

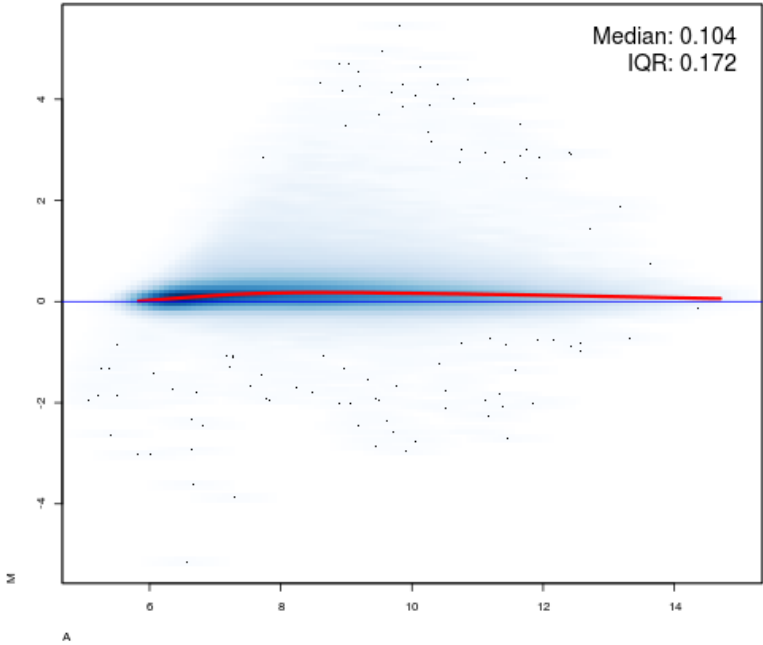

Array3 vs pseudo-median reference chip

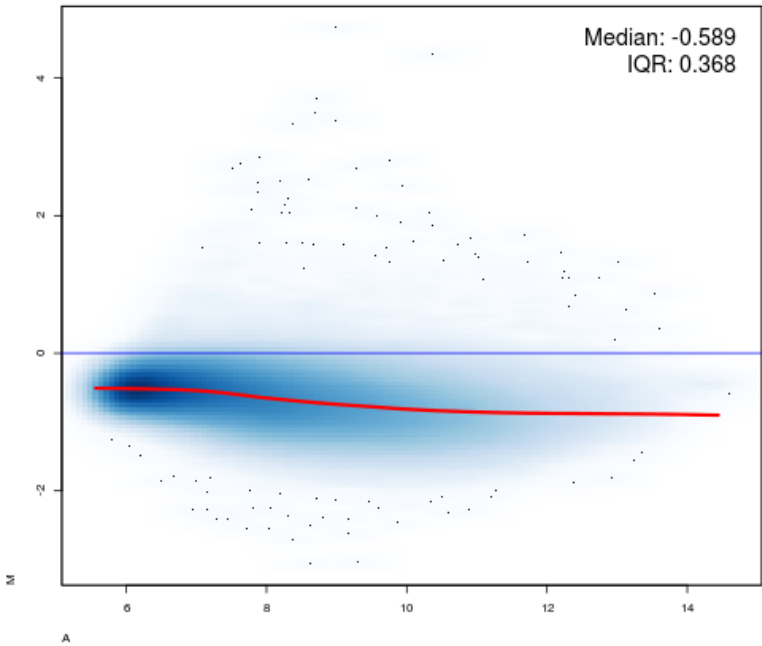

Array4 vs pseudo-median reference chip

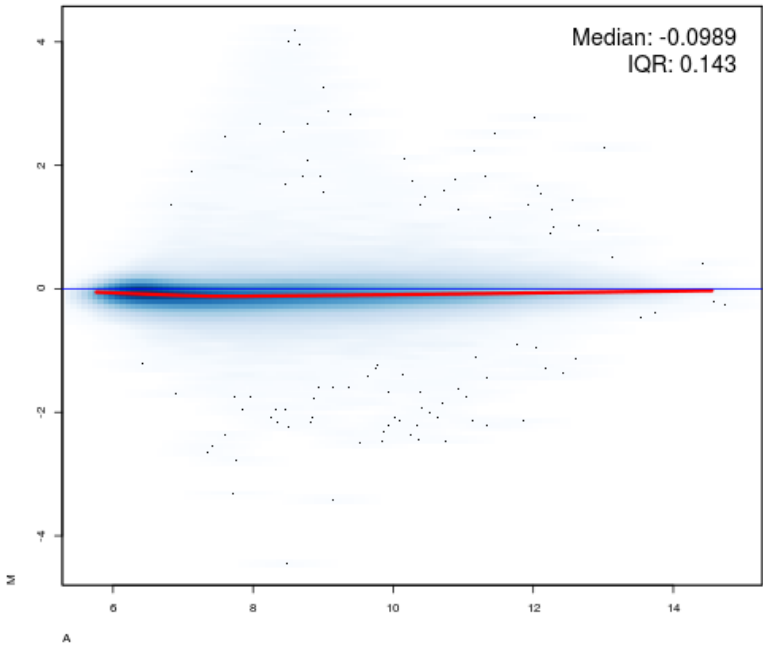

Array5 vs pseudo-median reference chip

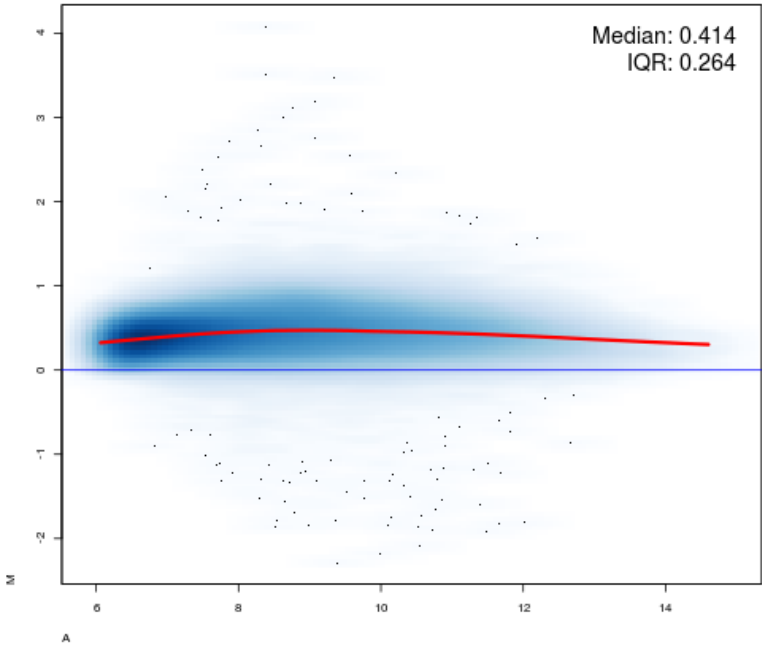

Array6 vs pseudo-median reference chip

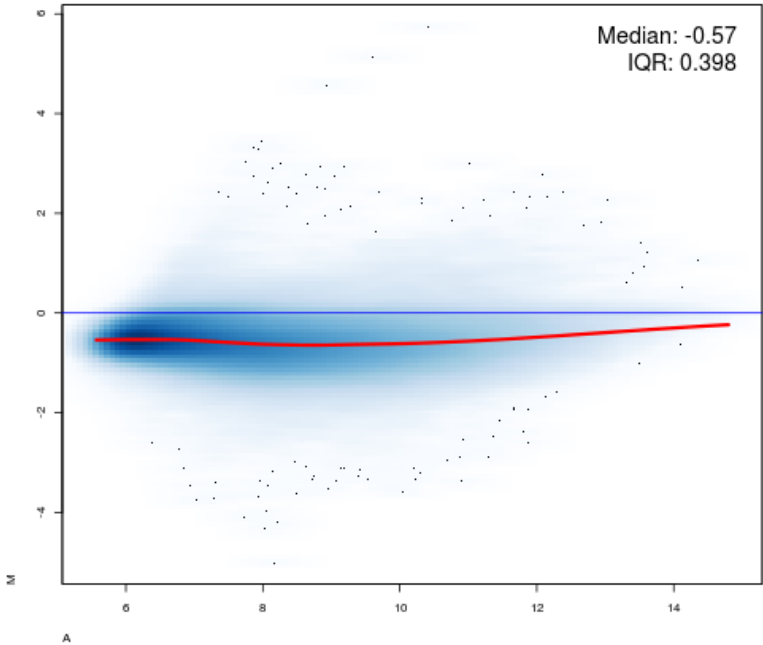



## 2D virtual PLM image for model characteristic: resids

Array1

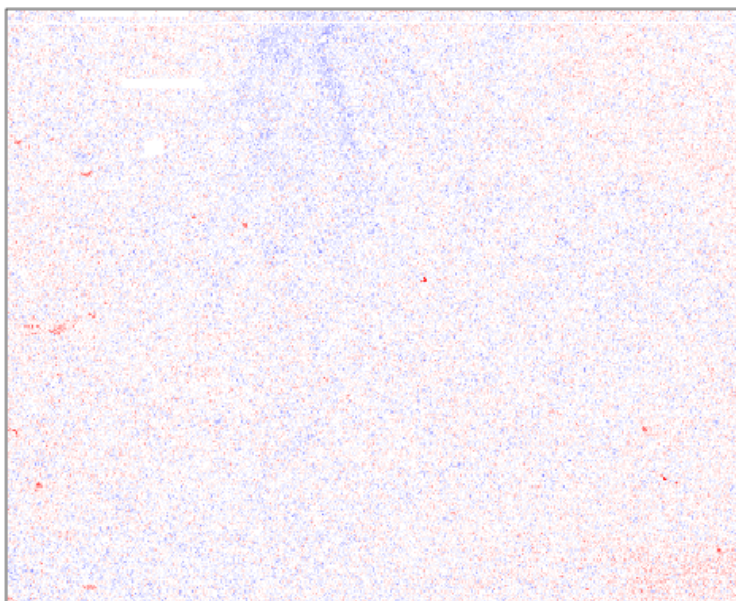

Array2

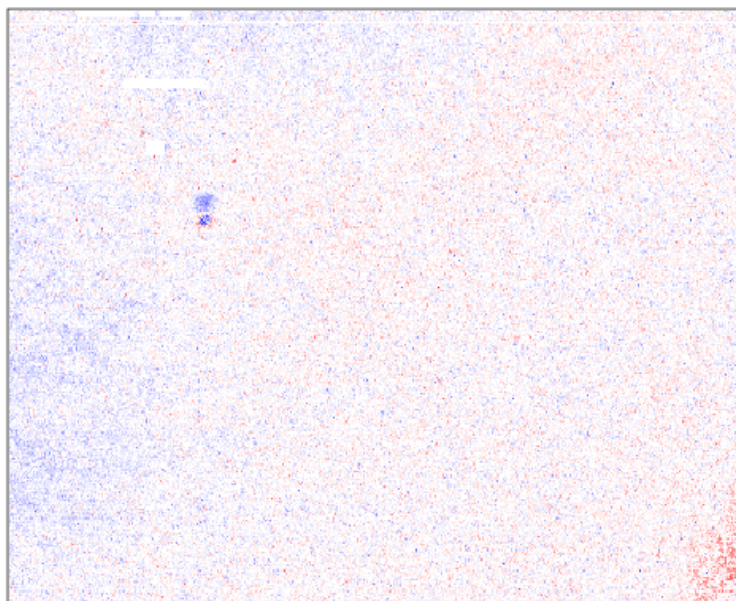

Array3

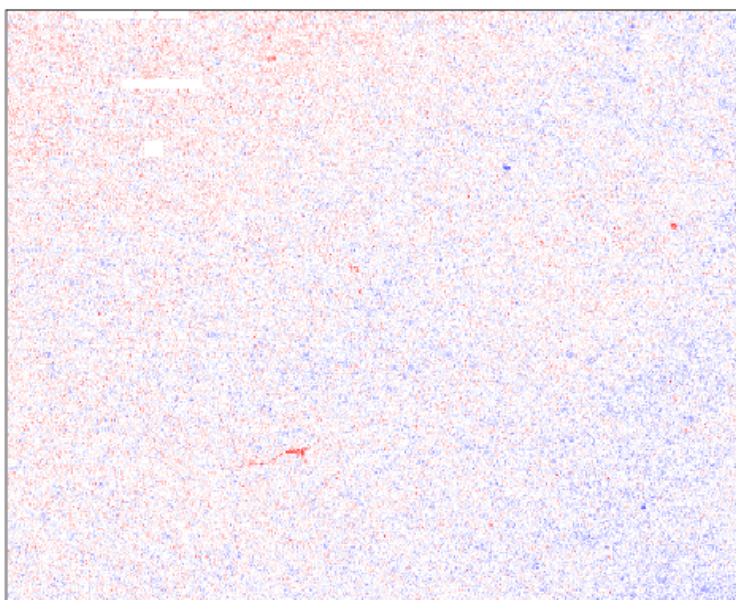

Array4

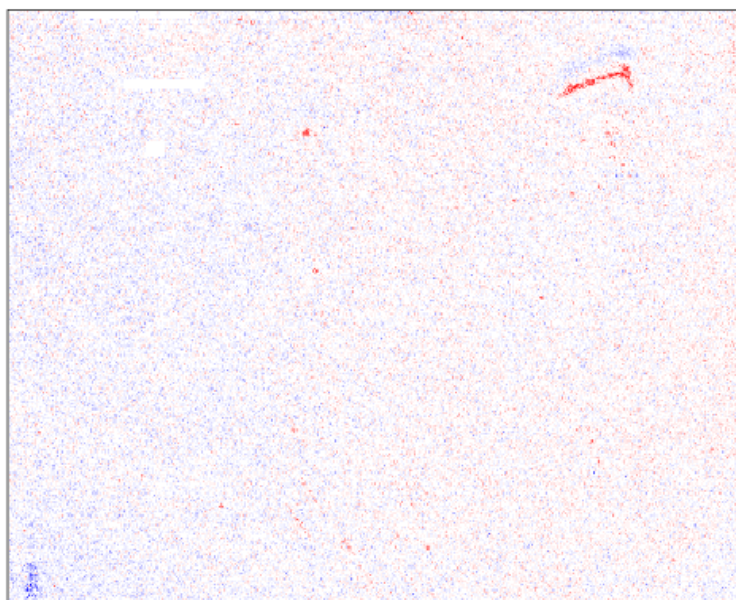

Array5

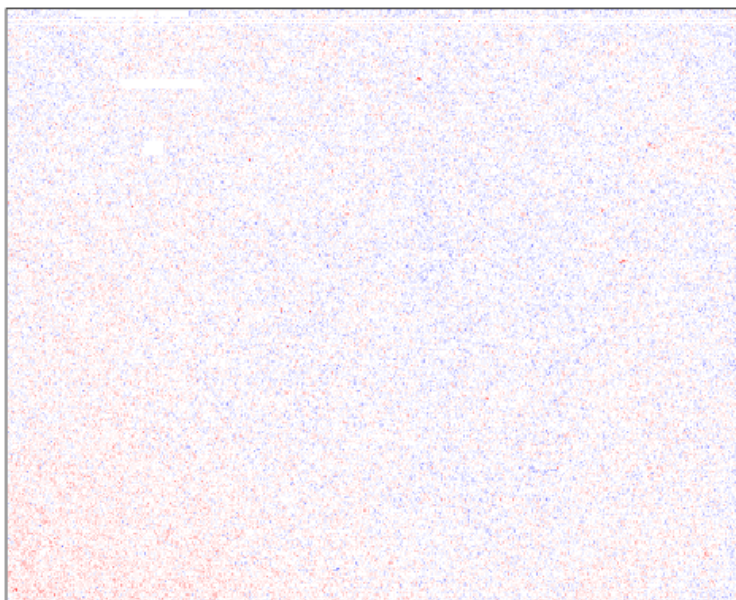

Array6

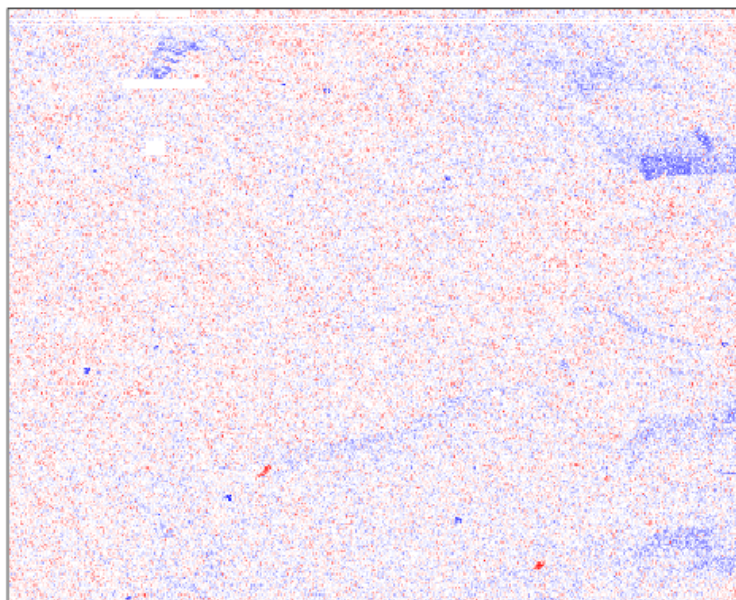



# Normalized Unscaled Standard Errors (NUSE)

NUSE median value should be < 1.1

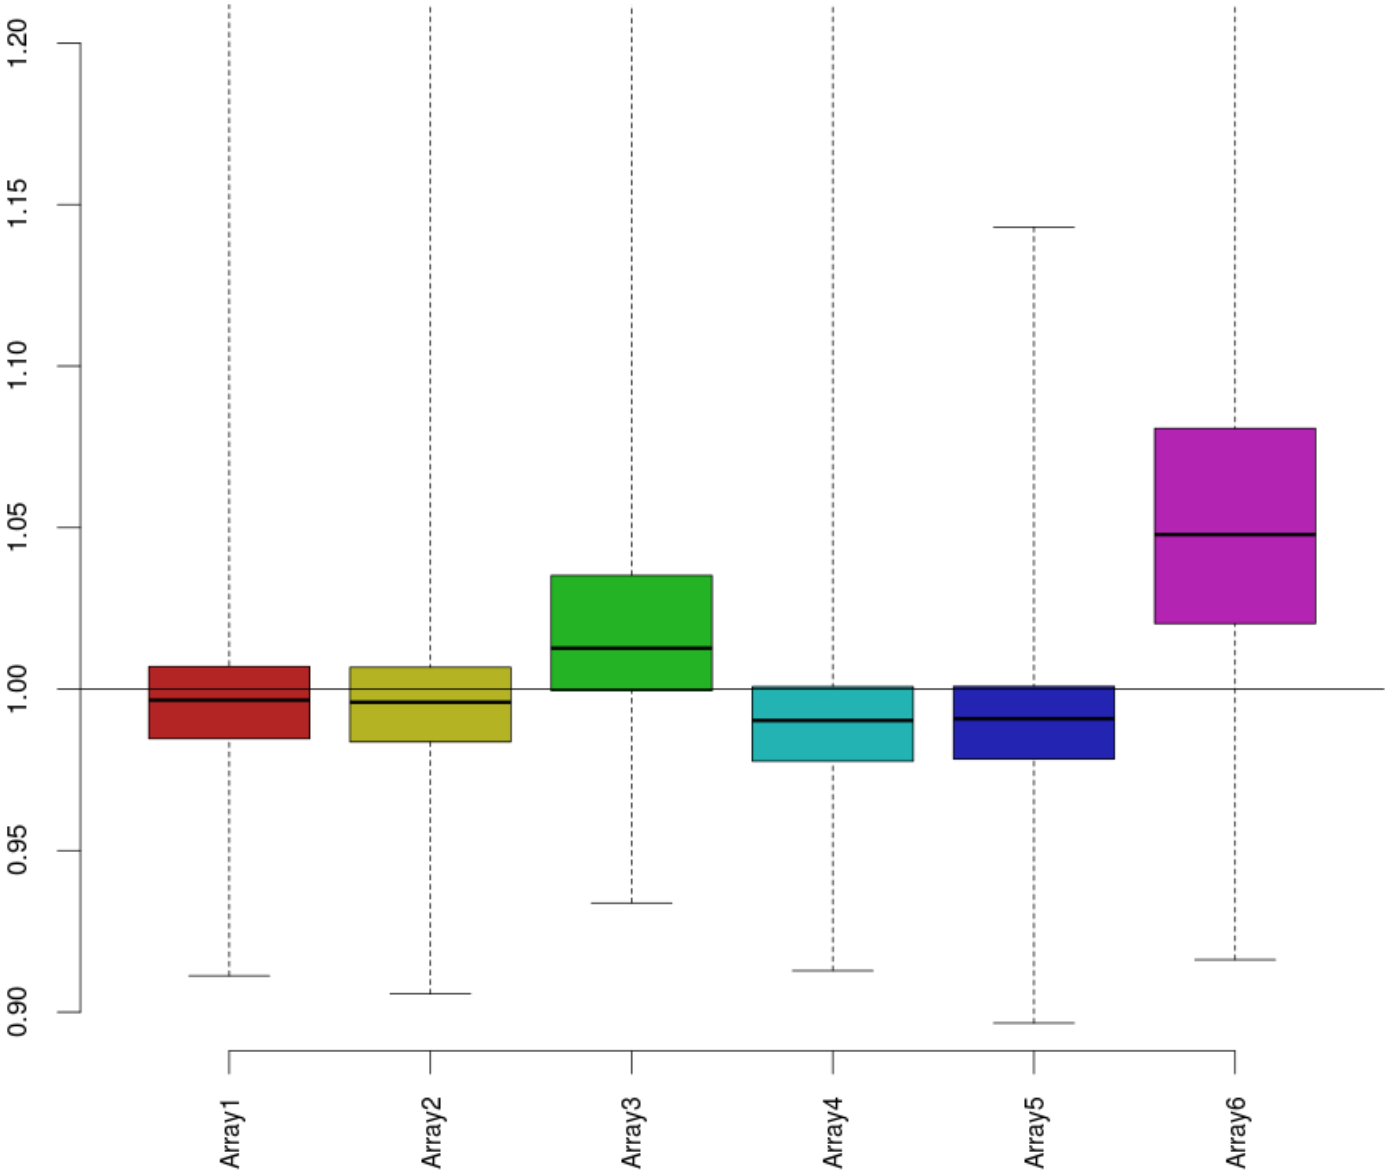

# Relative Log Expression (RLE)

RLE distributions should be centered around 0

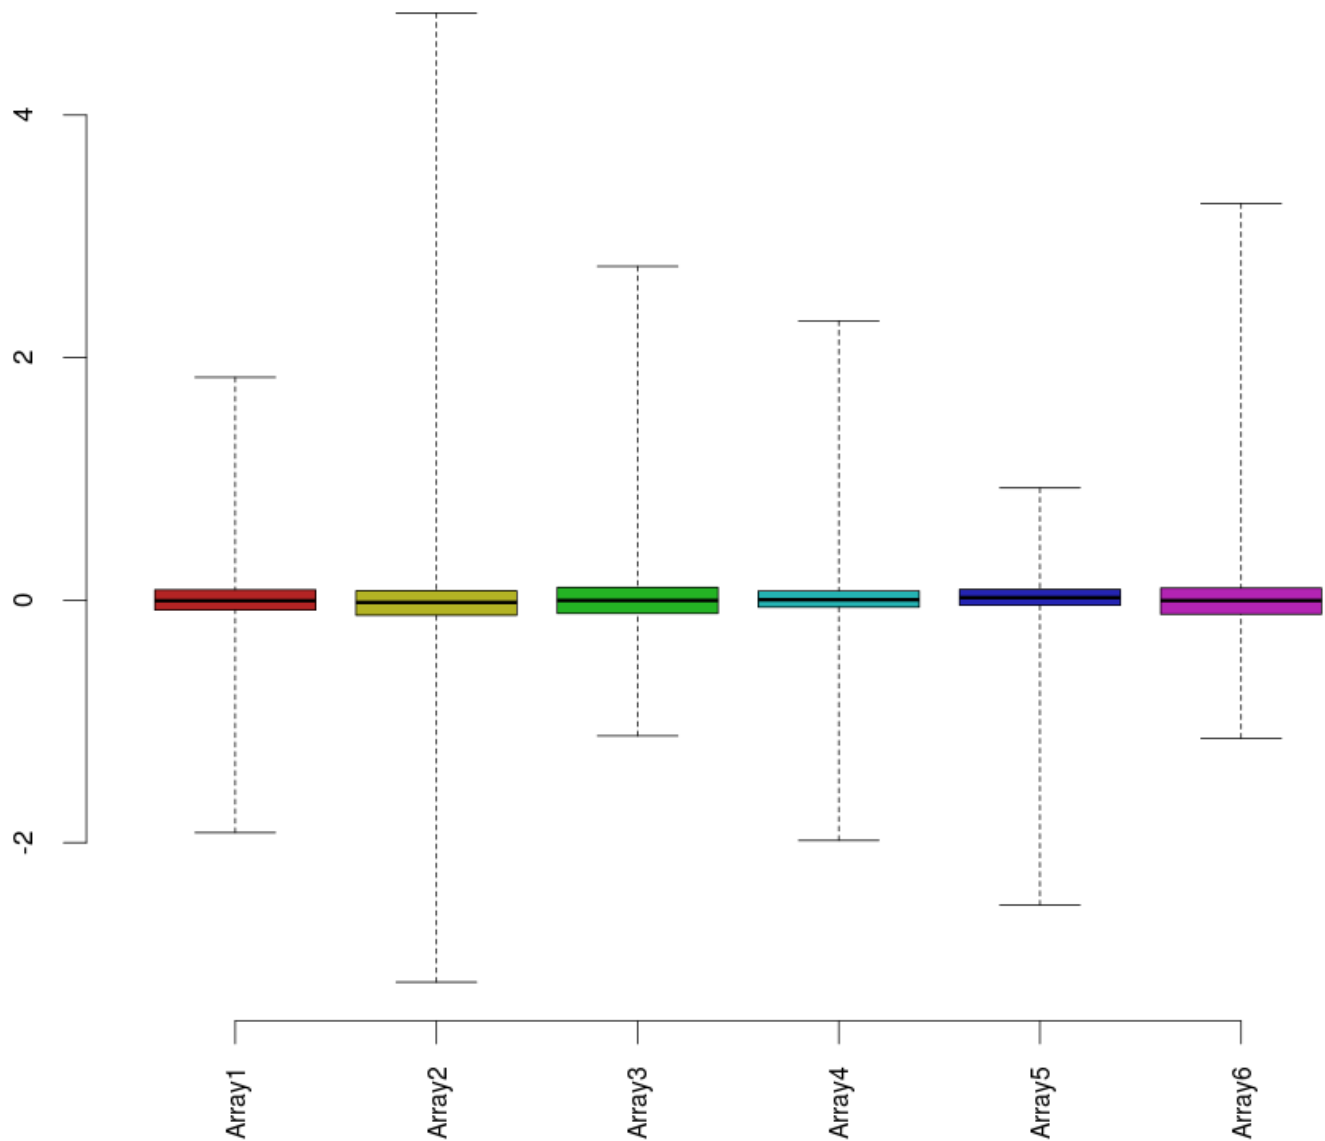

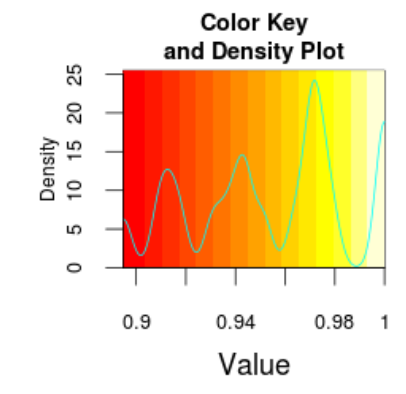

Raw data correlation plot  
correlation method: pearson  
cluster method: ward

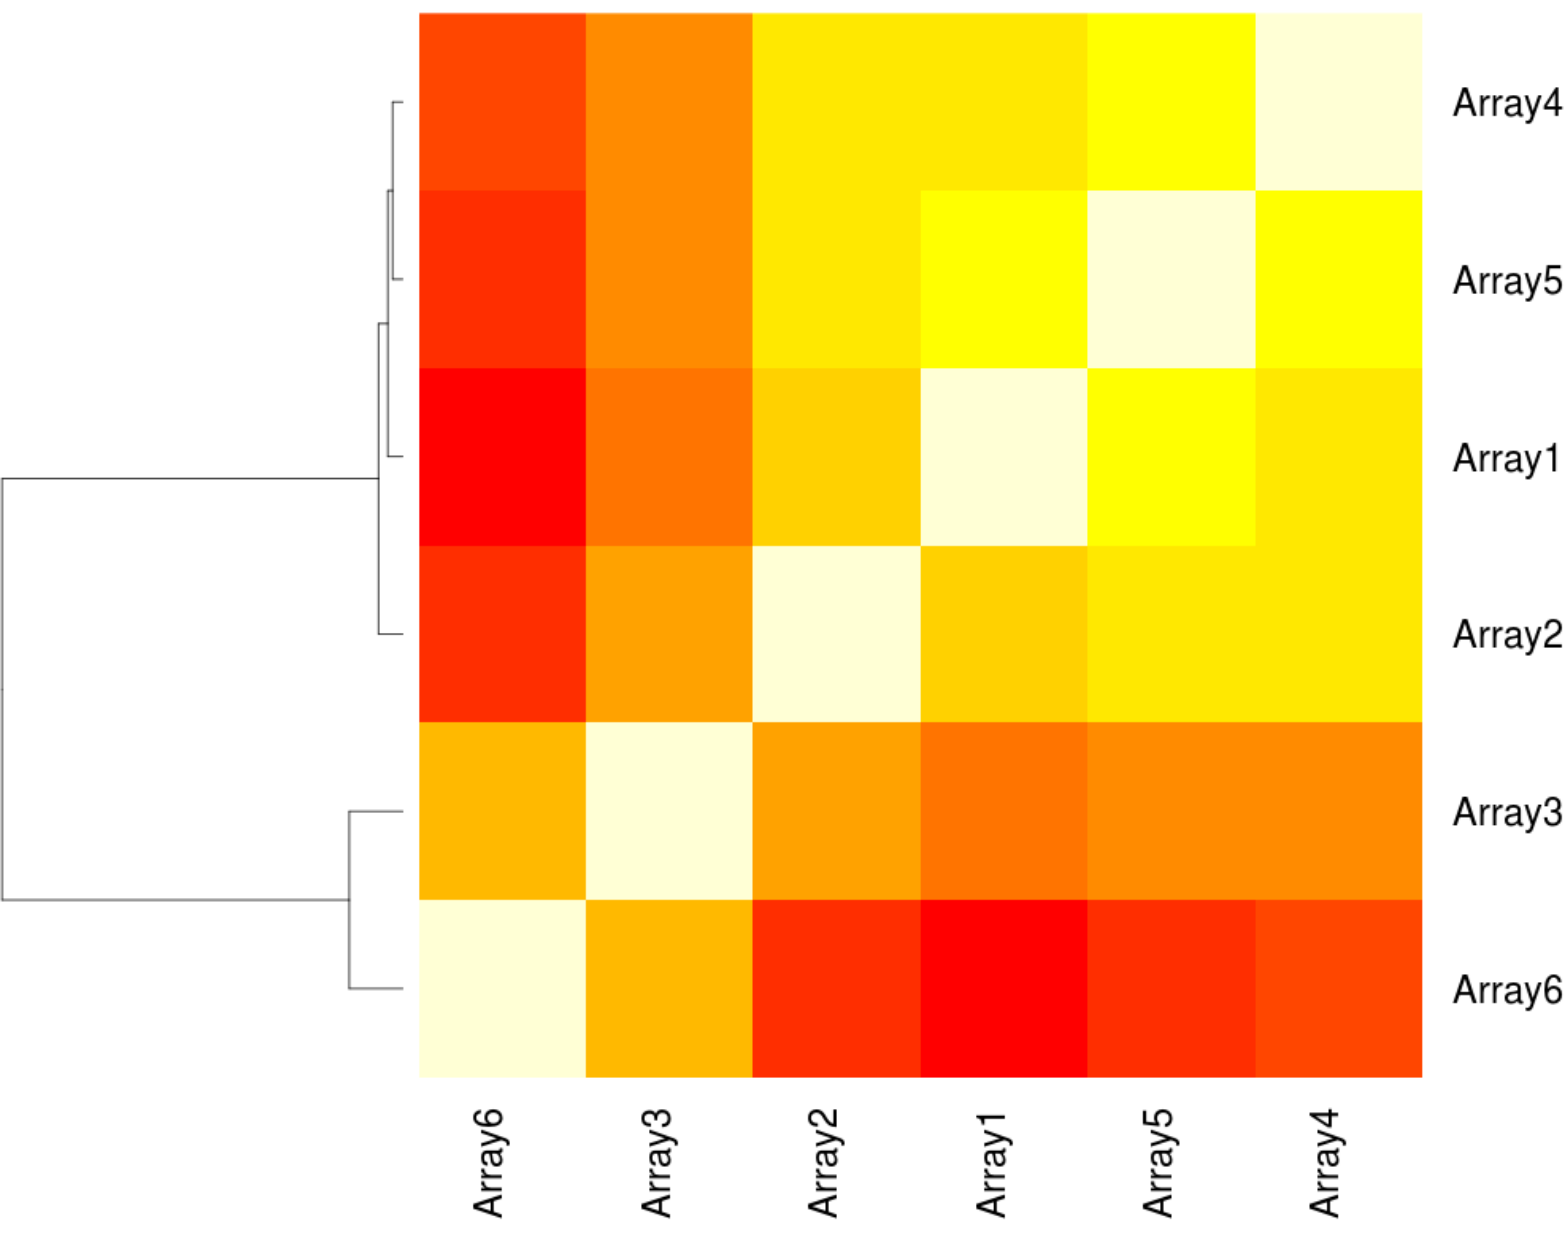

# PCA analysis of Raw data

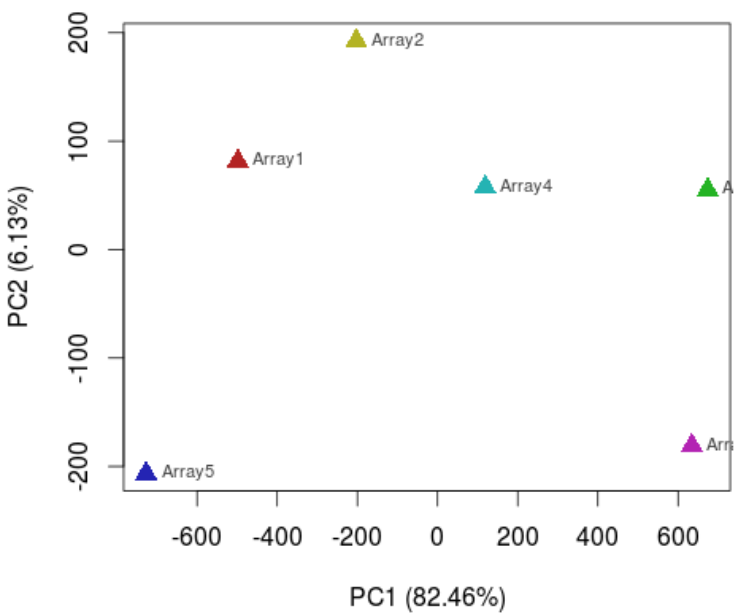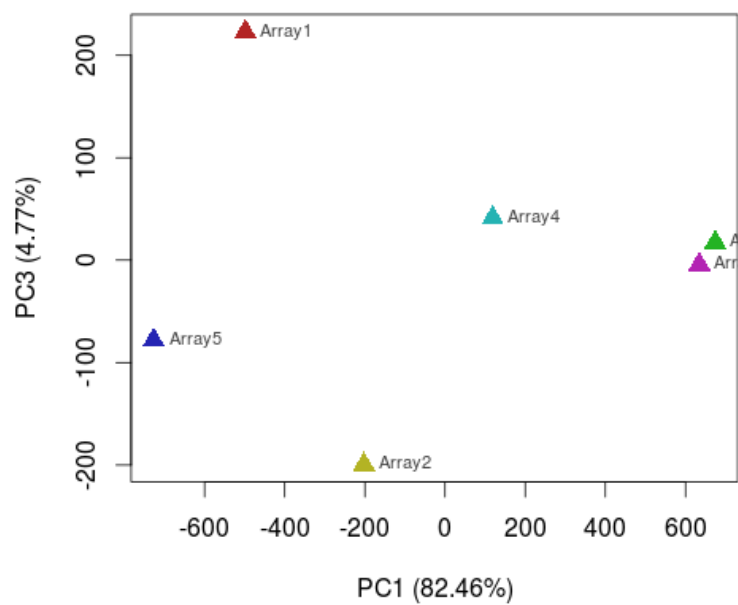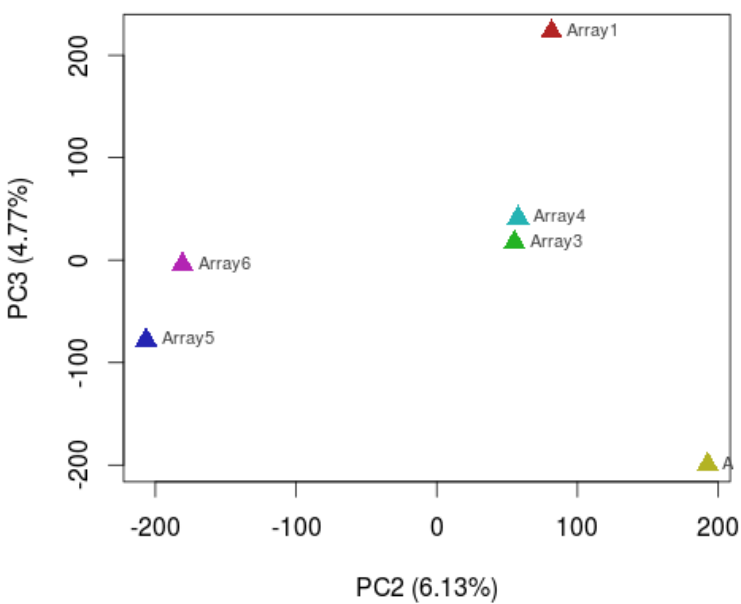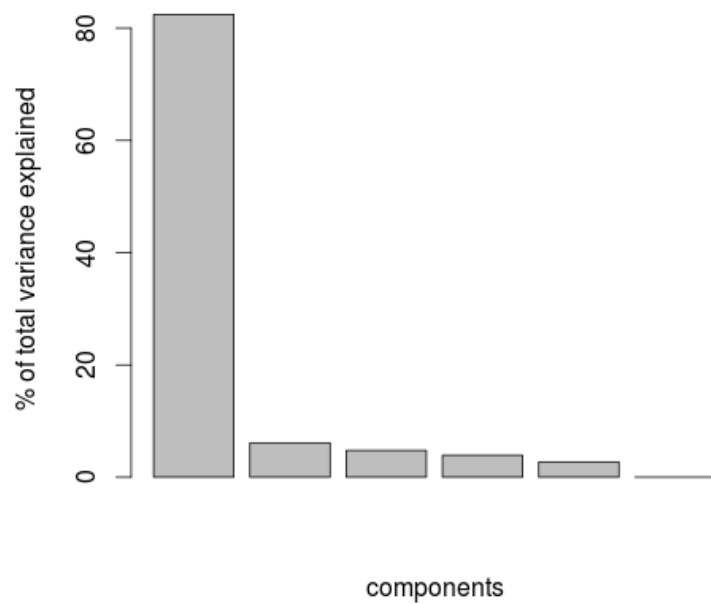

Cluster dendrogram of raw data

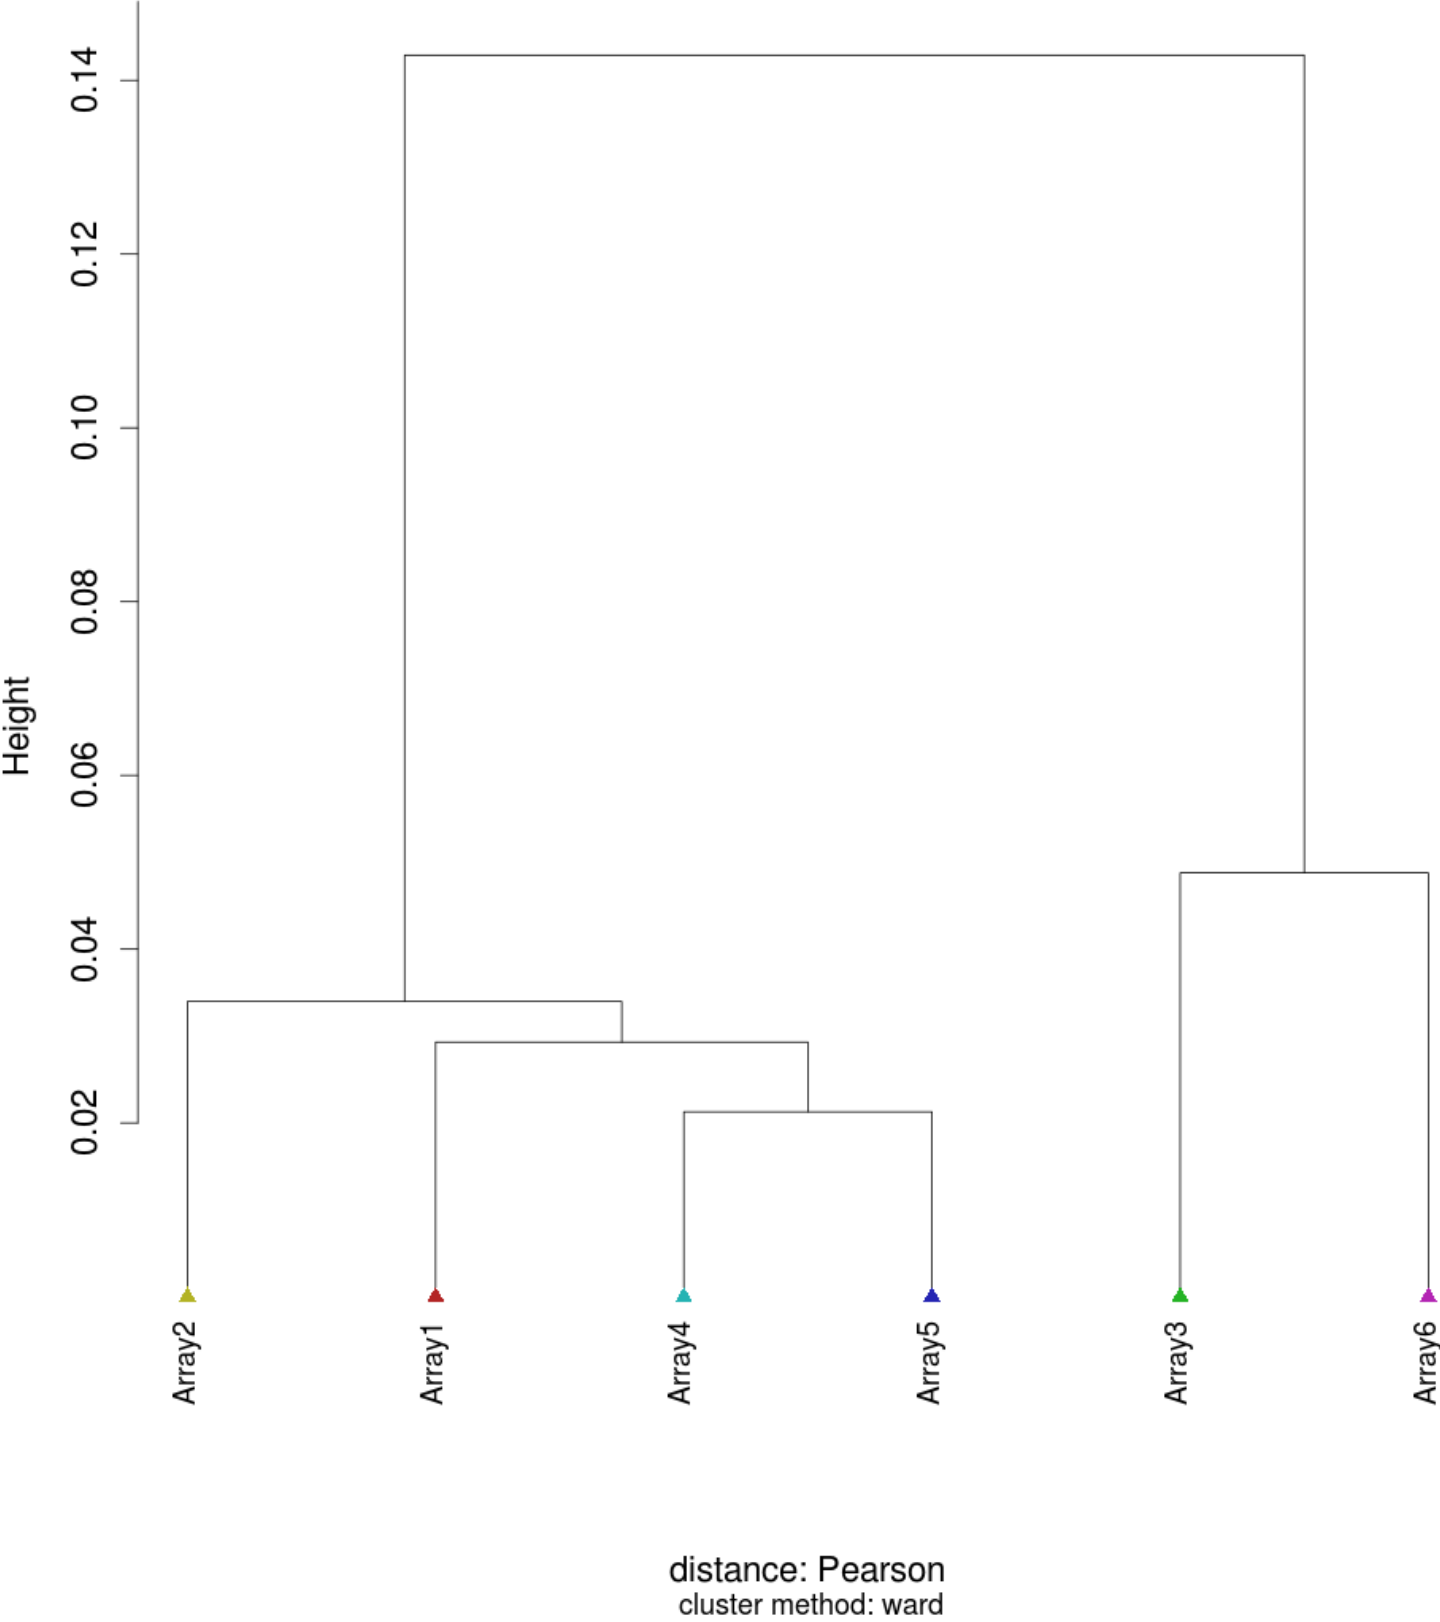

## Pre-processing of Raw Data

Method: GCRMA  
Annotation: HG\_U95Av2

# Boxplot after GCRMA

Distributions should be comparable between arrays

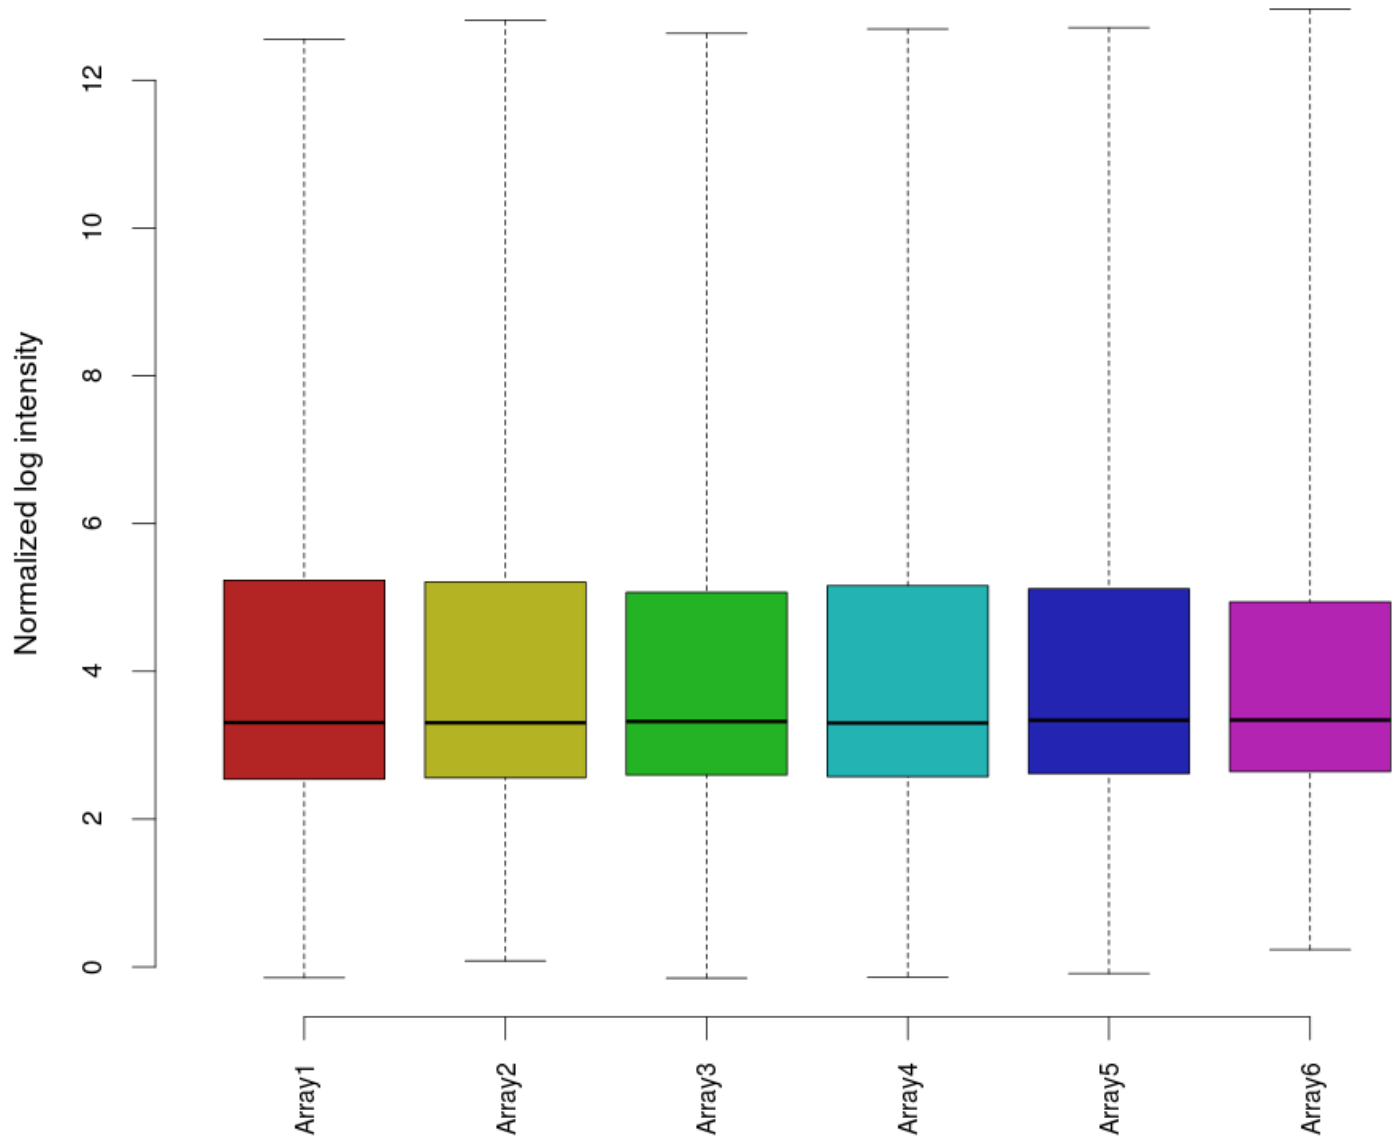

# Density histogram after GCRMA

Curves should be comparable between arrays

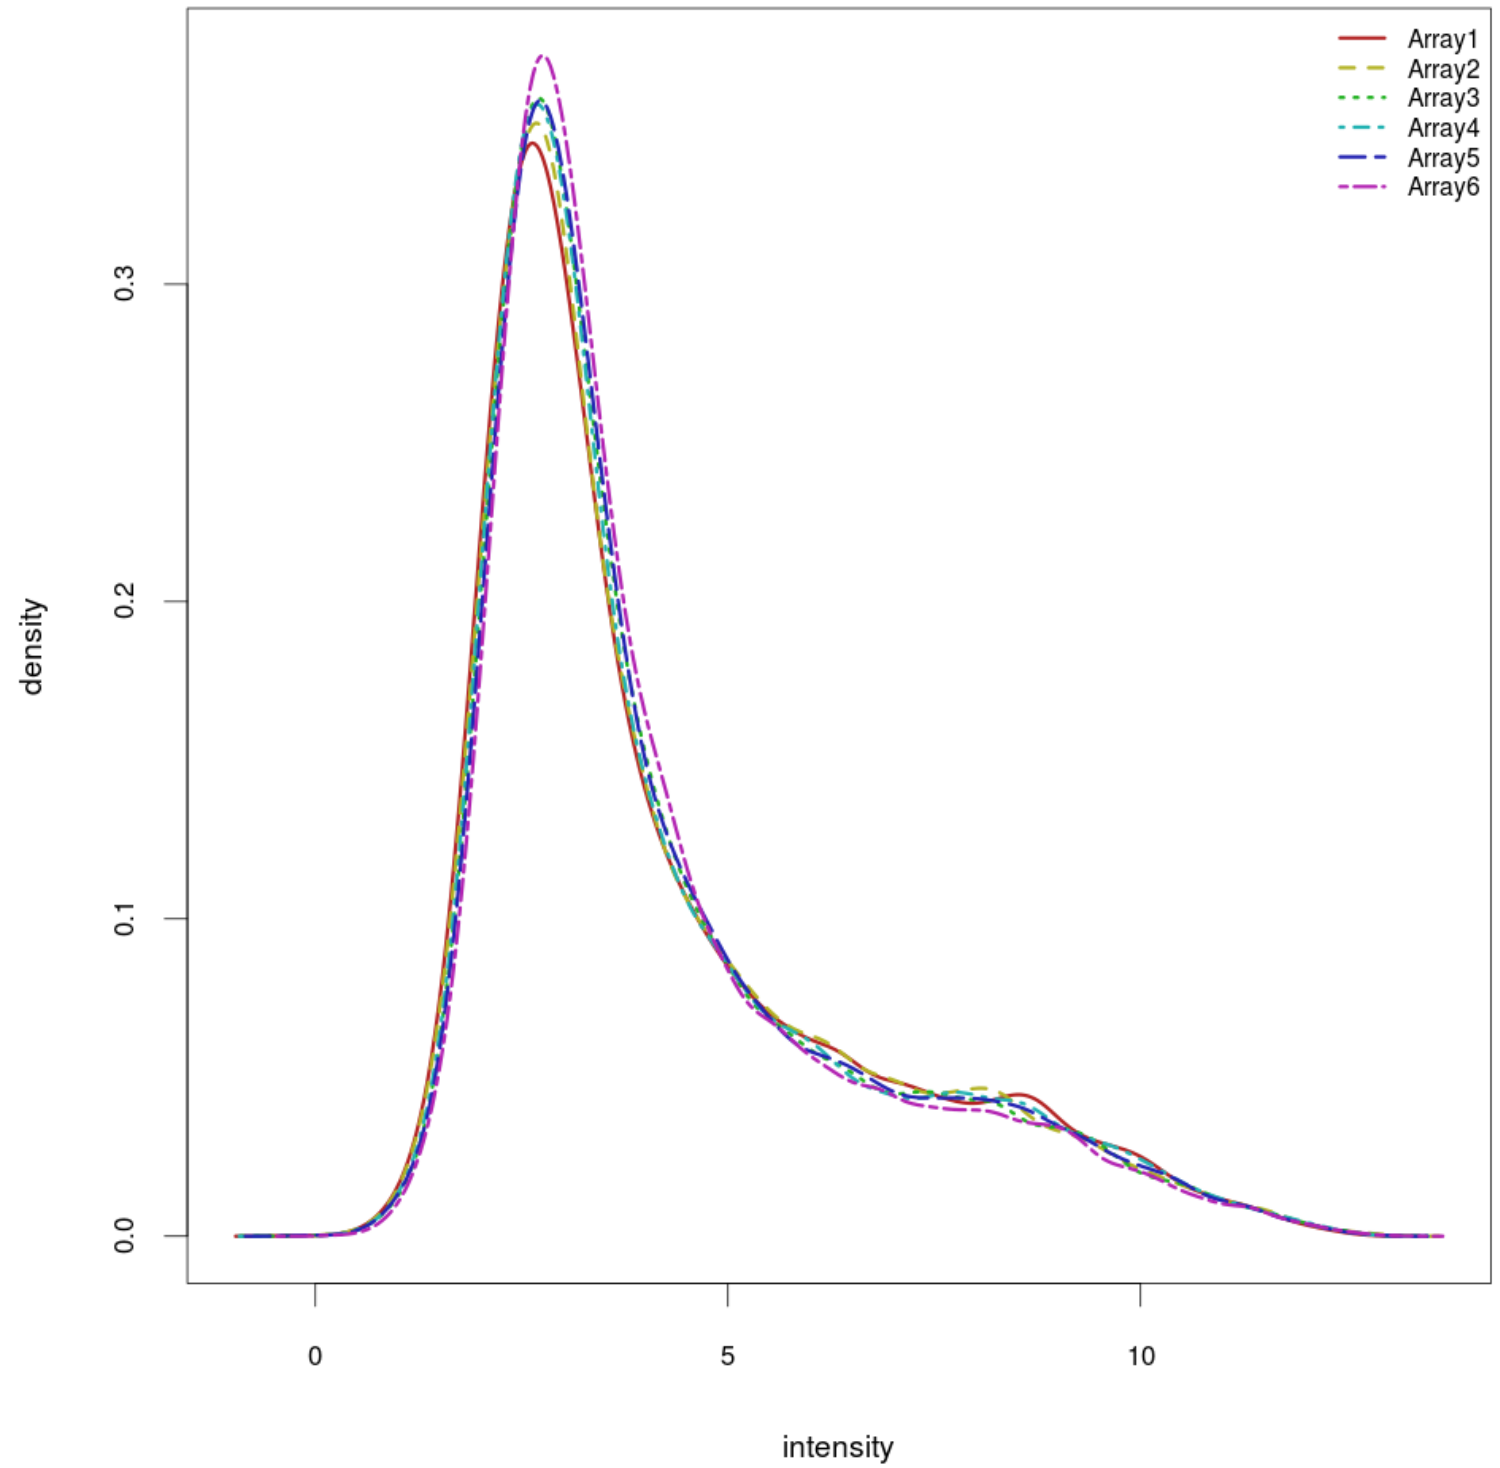



# MA plots afterGCRMANormalization

Array1 vs pseudo-median reference chip

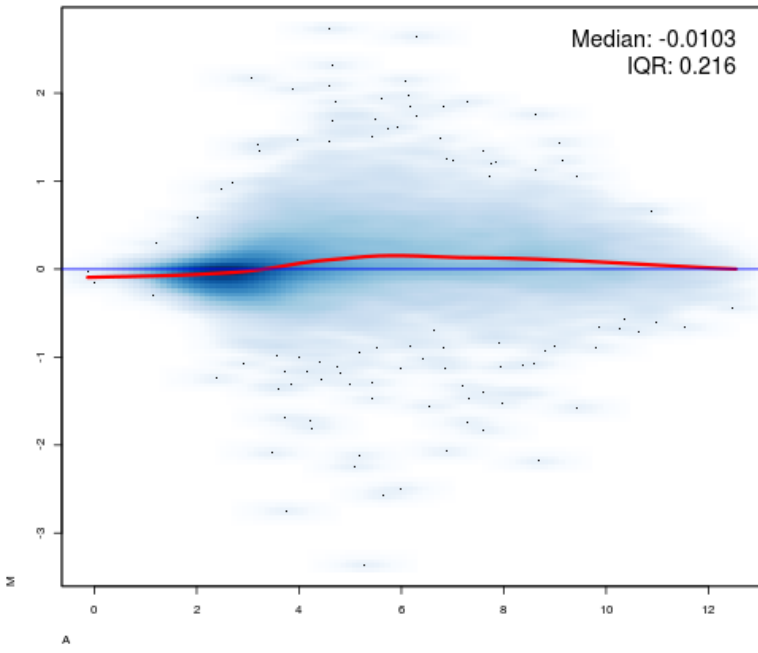

Array2 vs pseudo-median reference chip

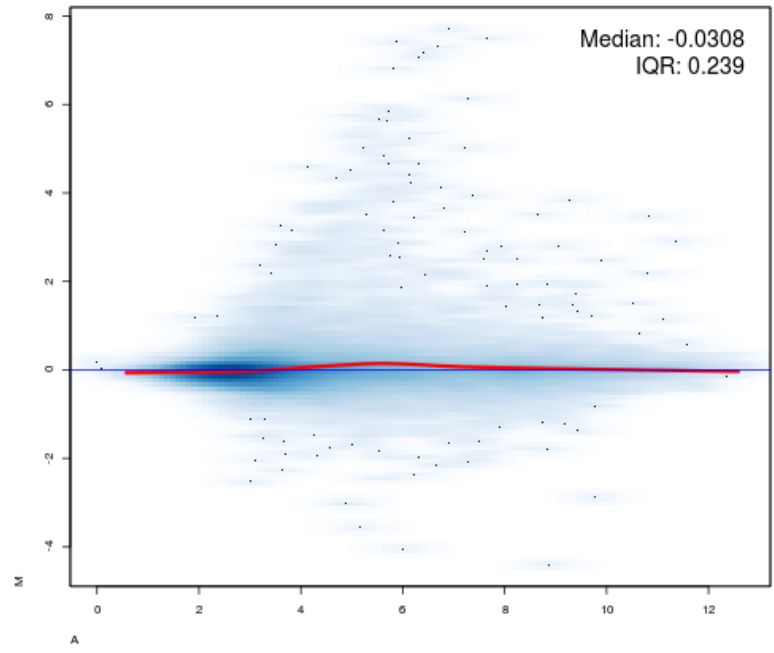

Array3 vs pseudo-median reference chip

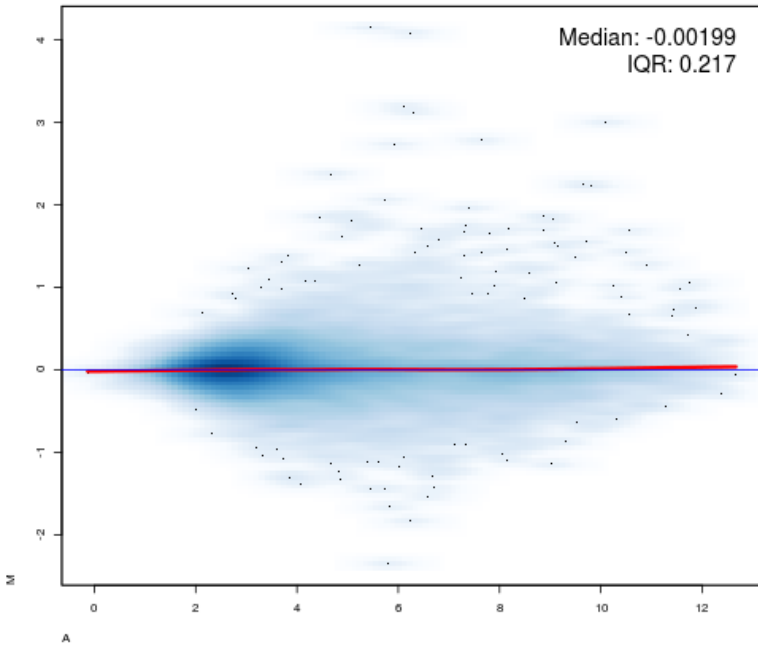

Array4 vs pseudo-median reference chip

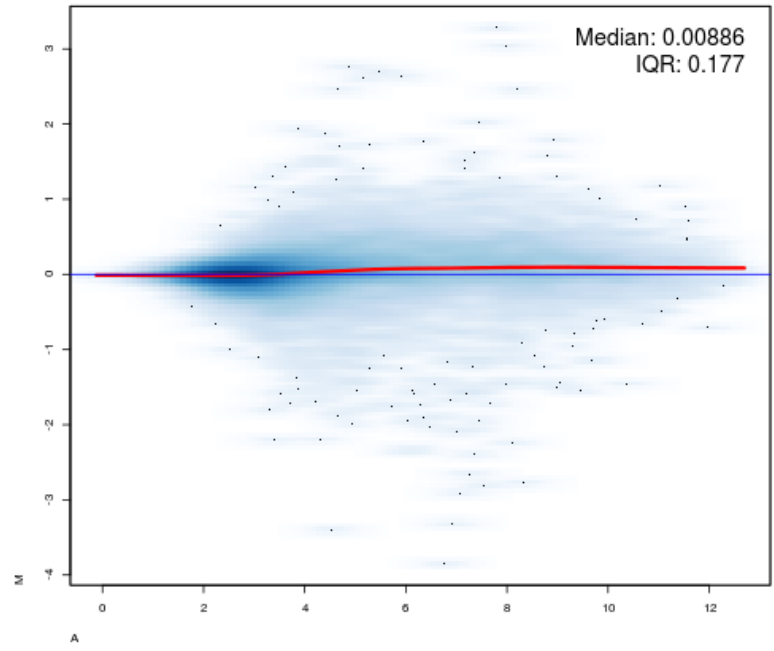

Array5 vs pseudo-median reference chip

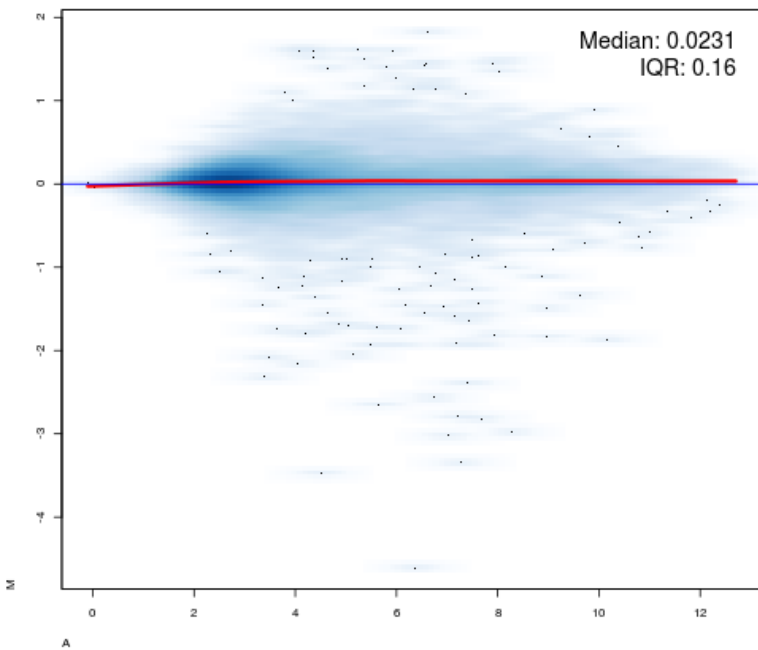

Array6 vs pseudo-median reference chip

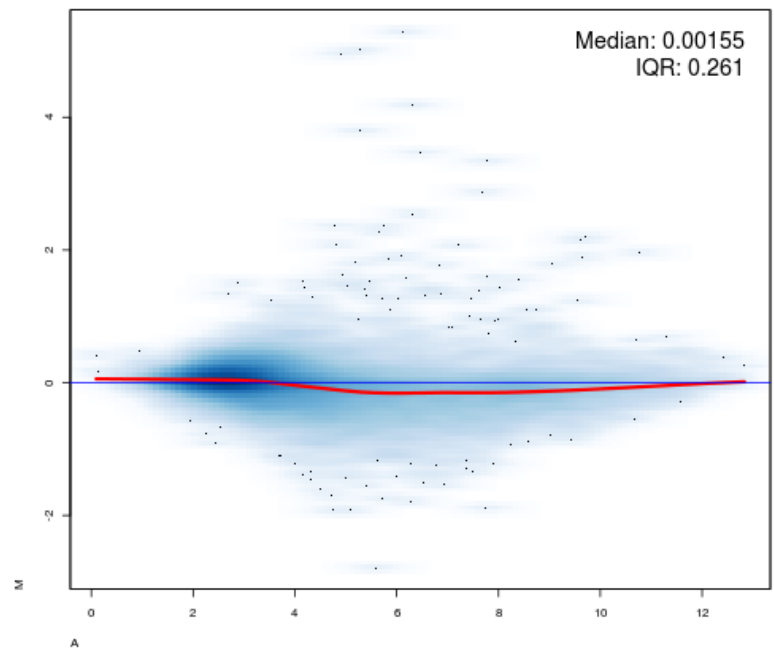

Color Key  
and Density Plot

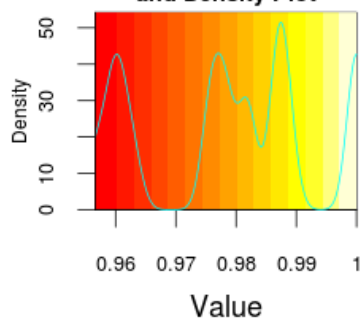

Array correlation plot  
after GCRMA normalization  
correlation method: pearson  
cluster method: ward

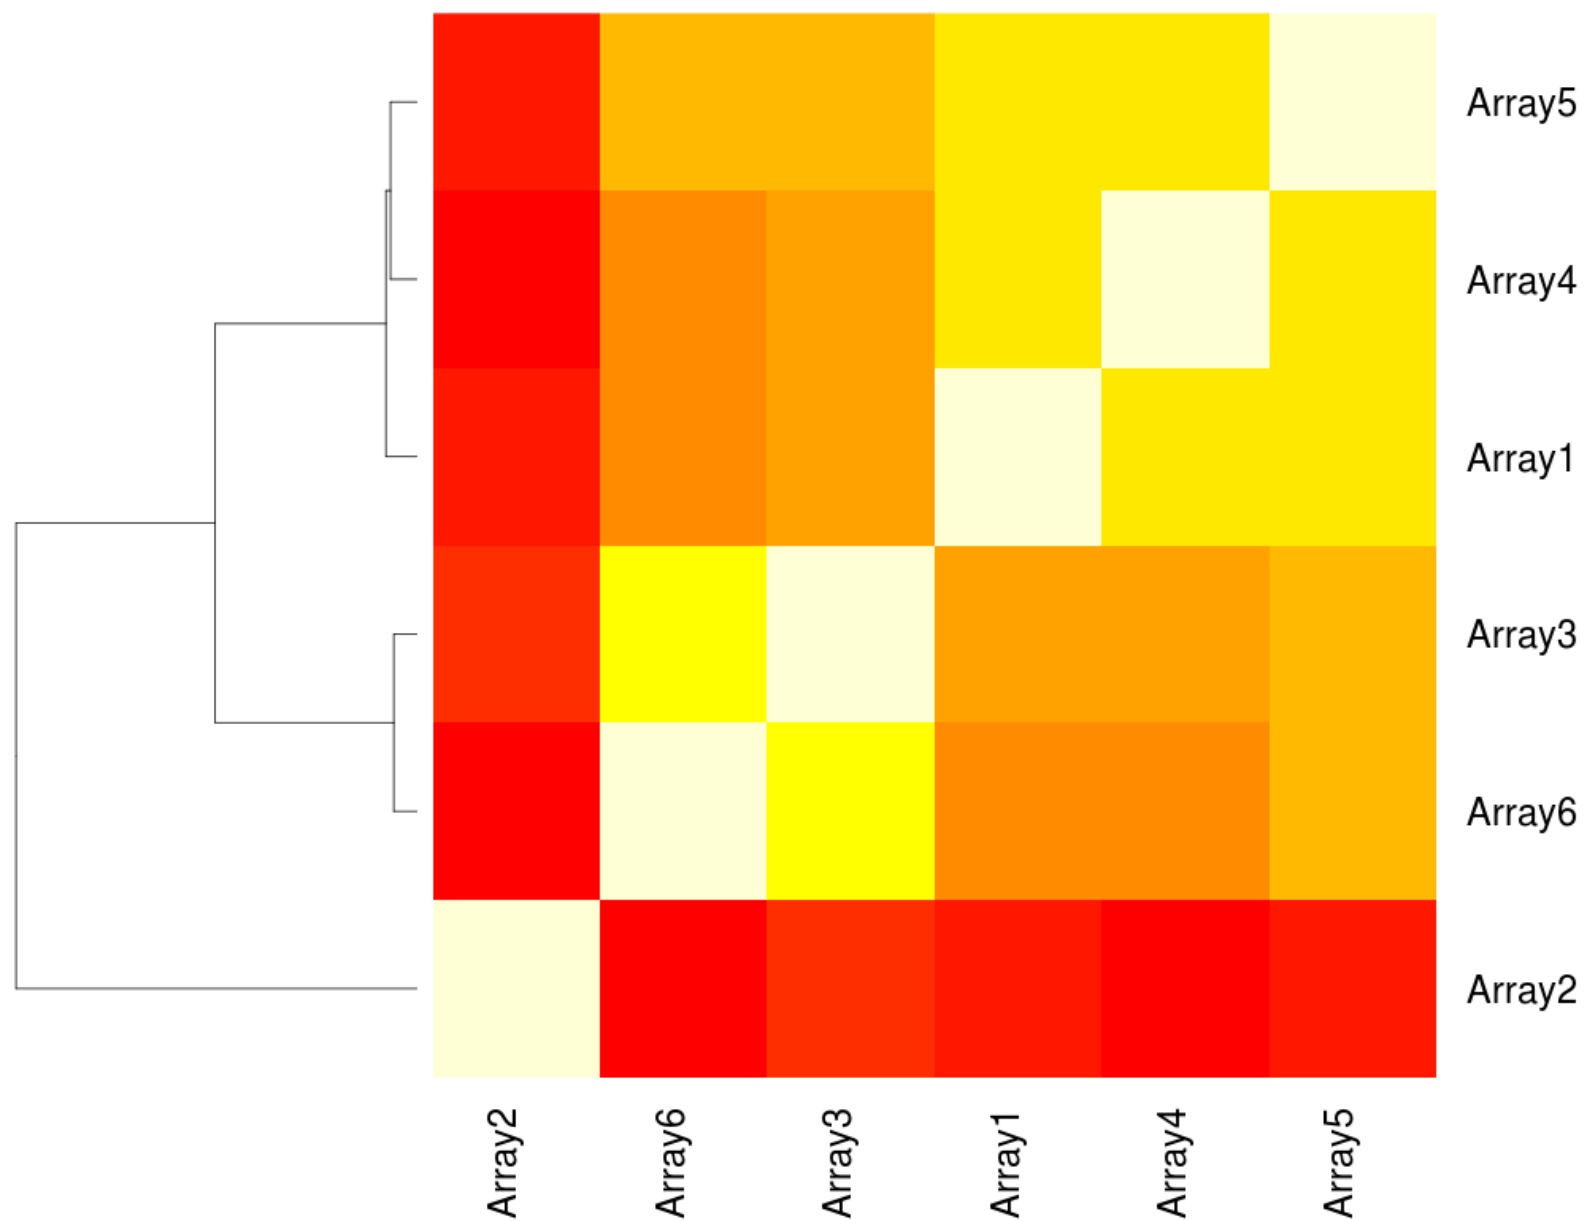

# PCA analysis after GCRMA normalization

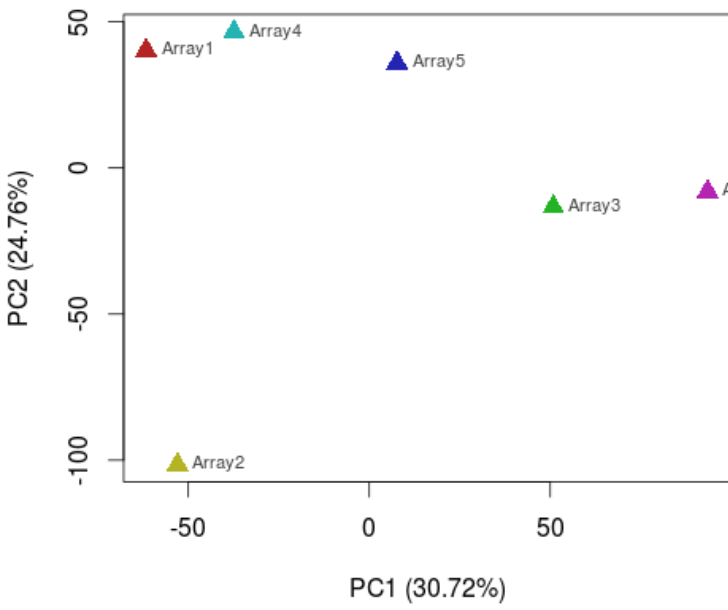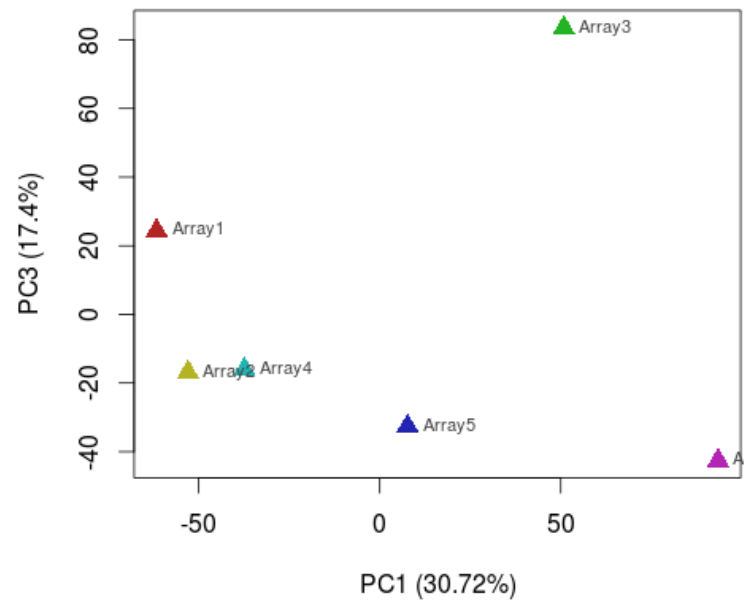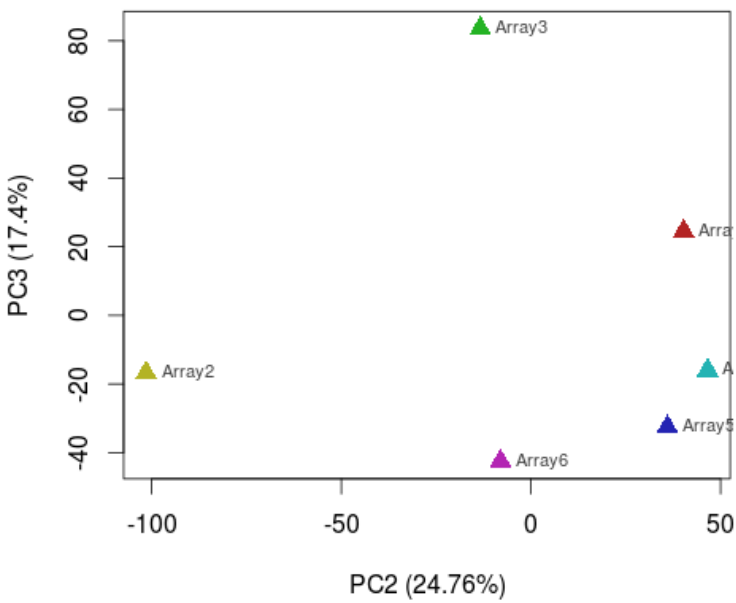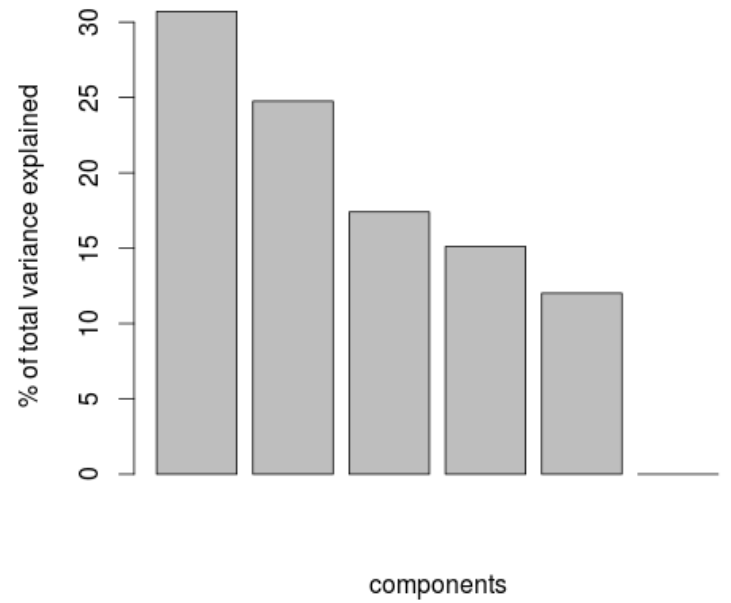

Cluster dendrogram of GCRMA normalized data

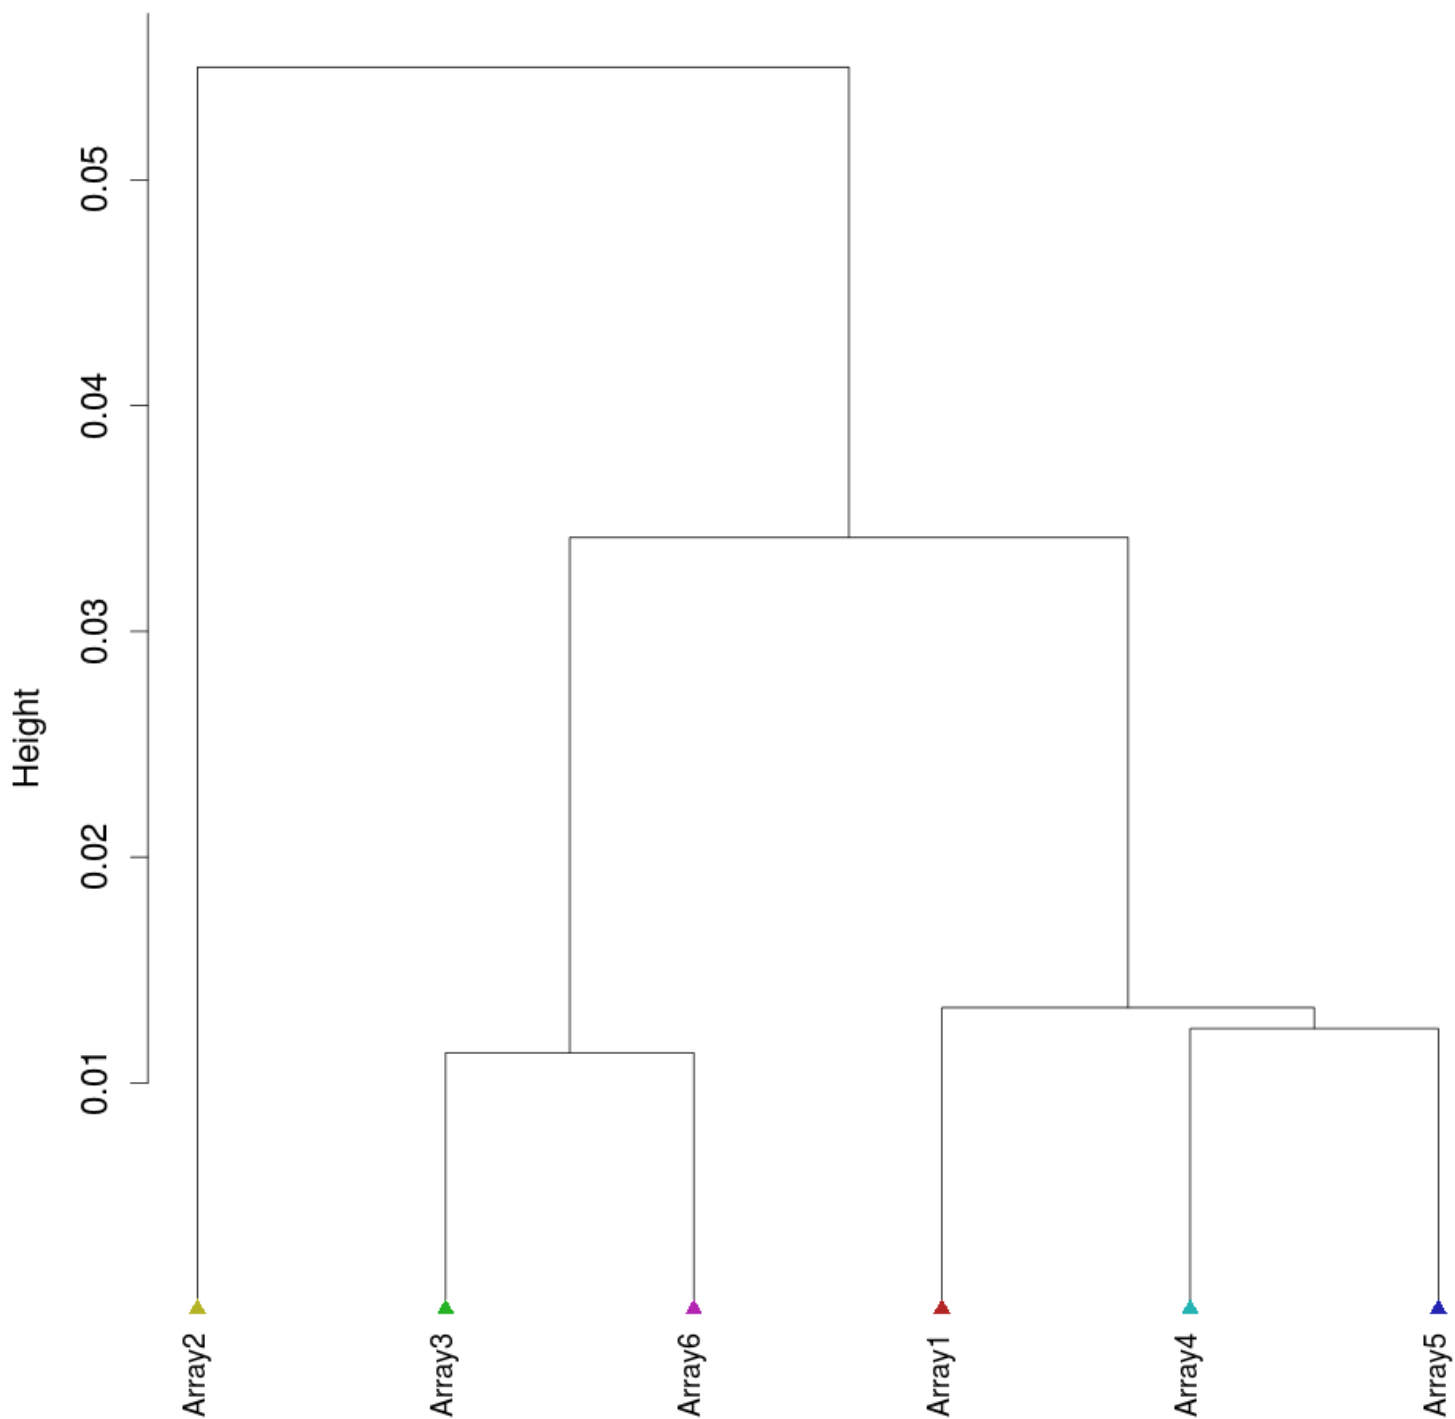

distance: Pearson  
cluster method: ward
